# Supplementary material
Source: MDPI journal article supplement (https://www.mdpi.com/2072-4292/13/2/327)

# INTENSITY IMAGES AND CORRESPONDING POWER SPECTRA

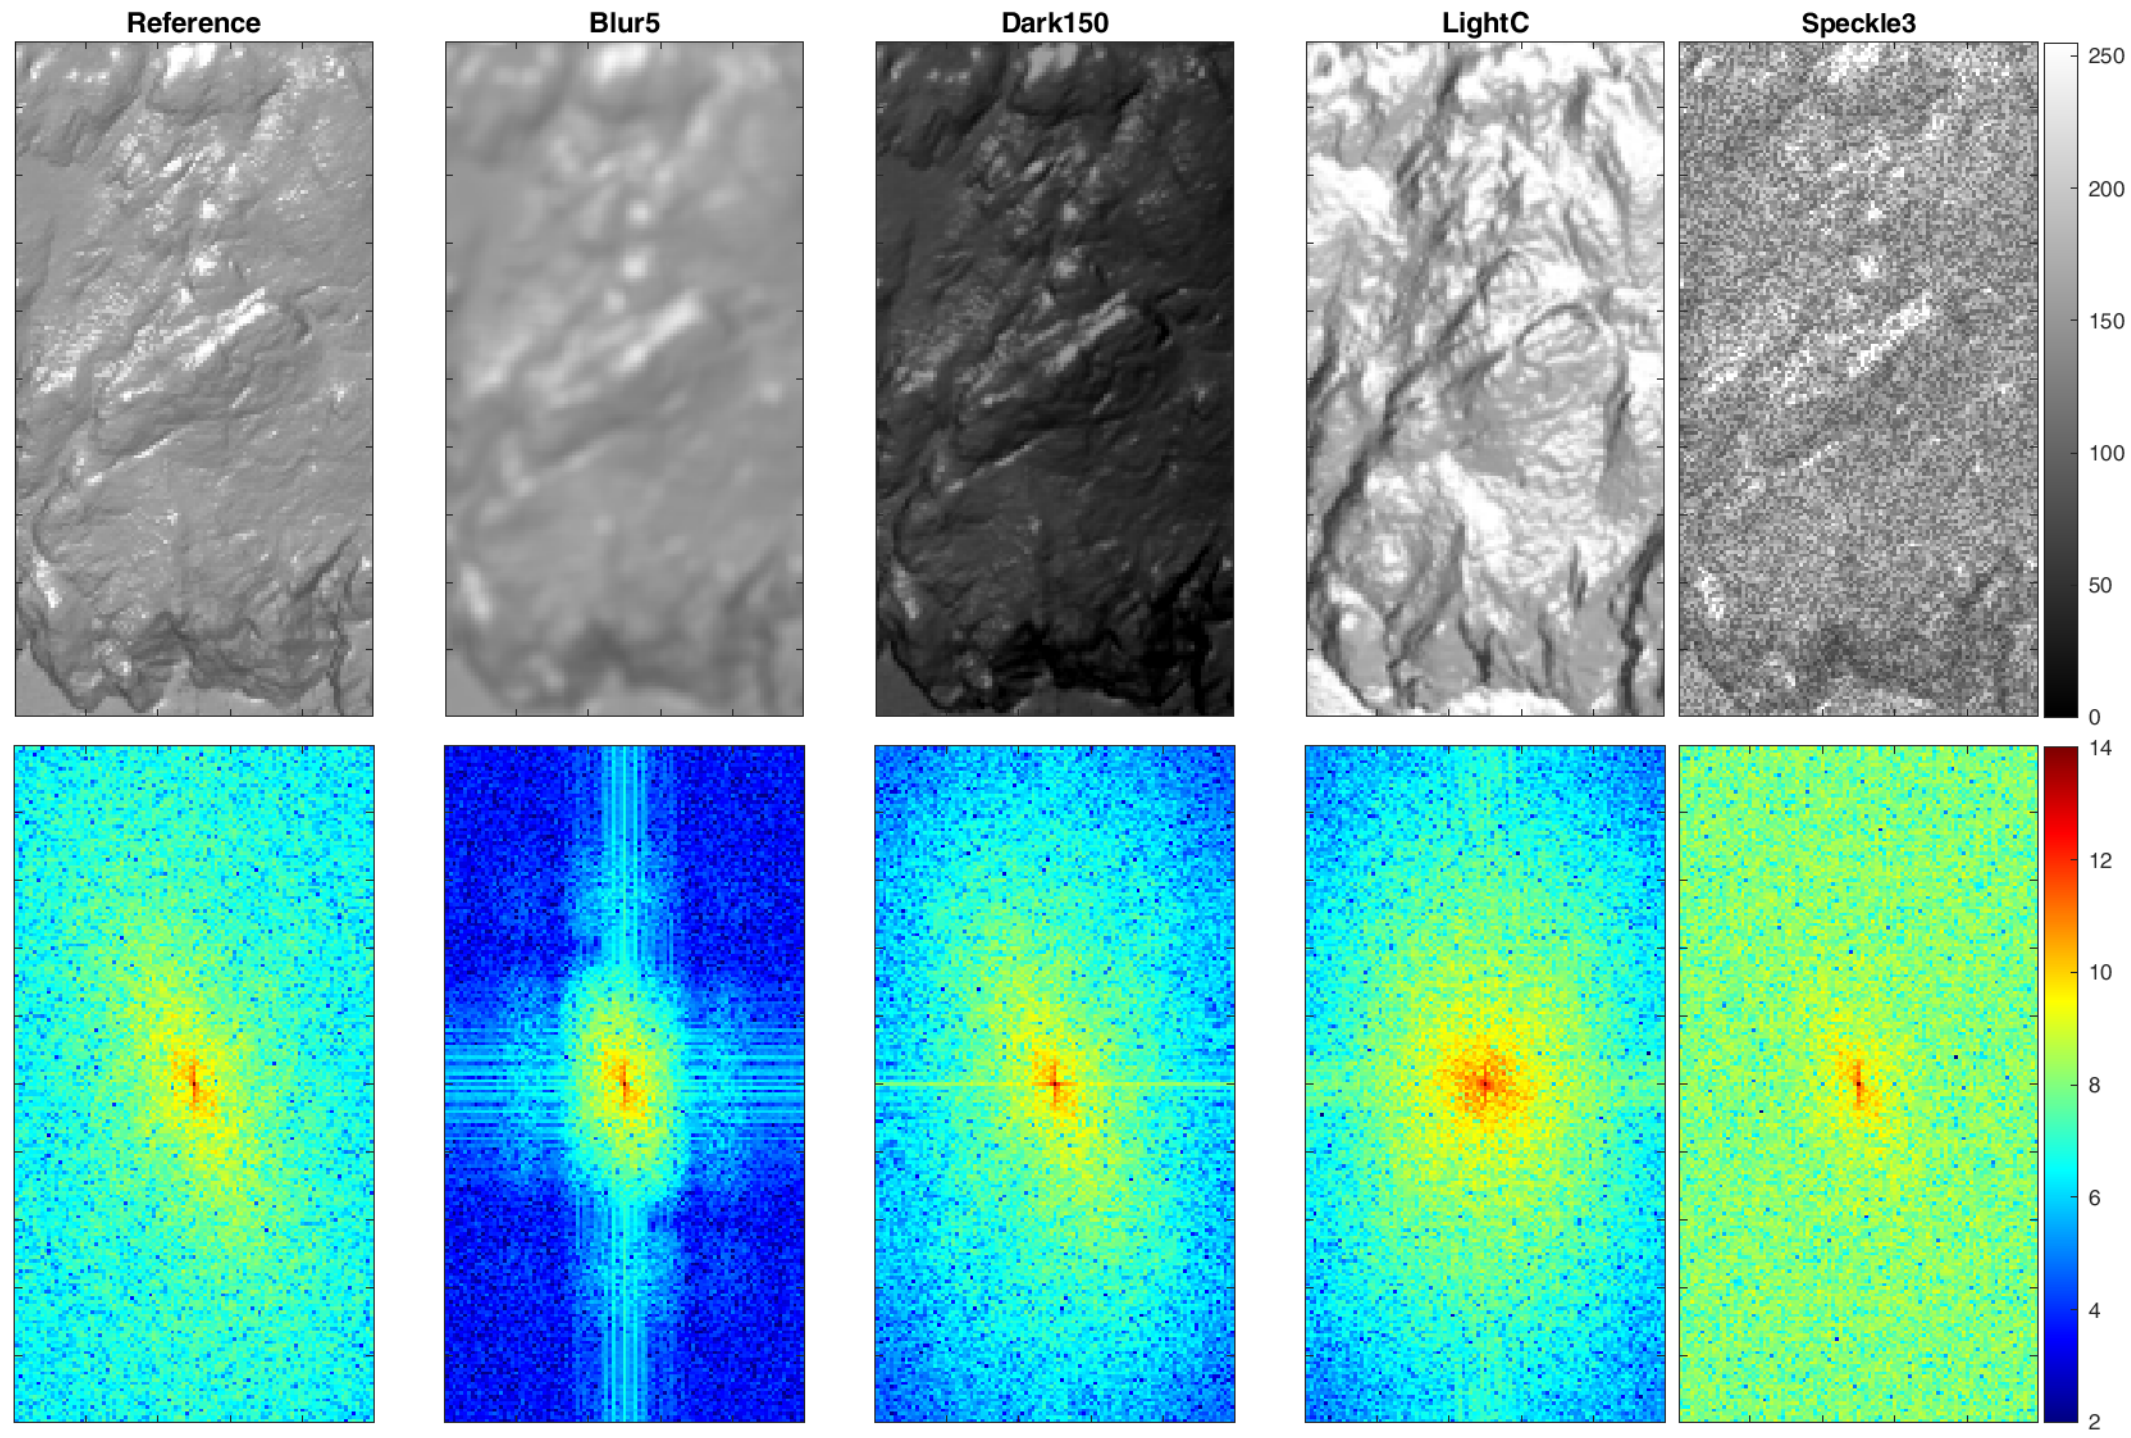

# GRADIENT IMAGES AND CORRESPONDING POWER SPECTRA

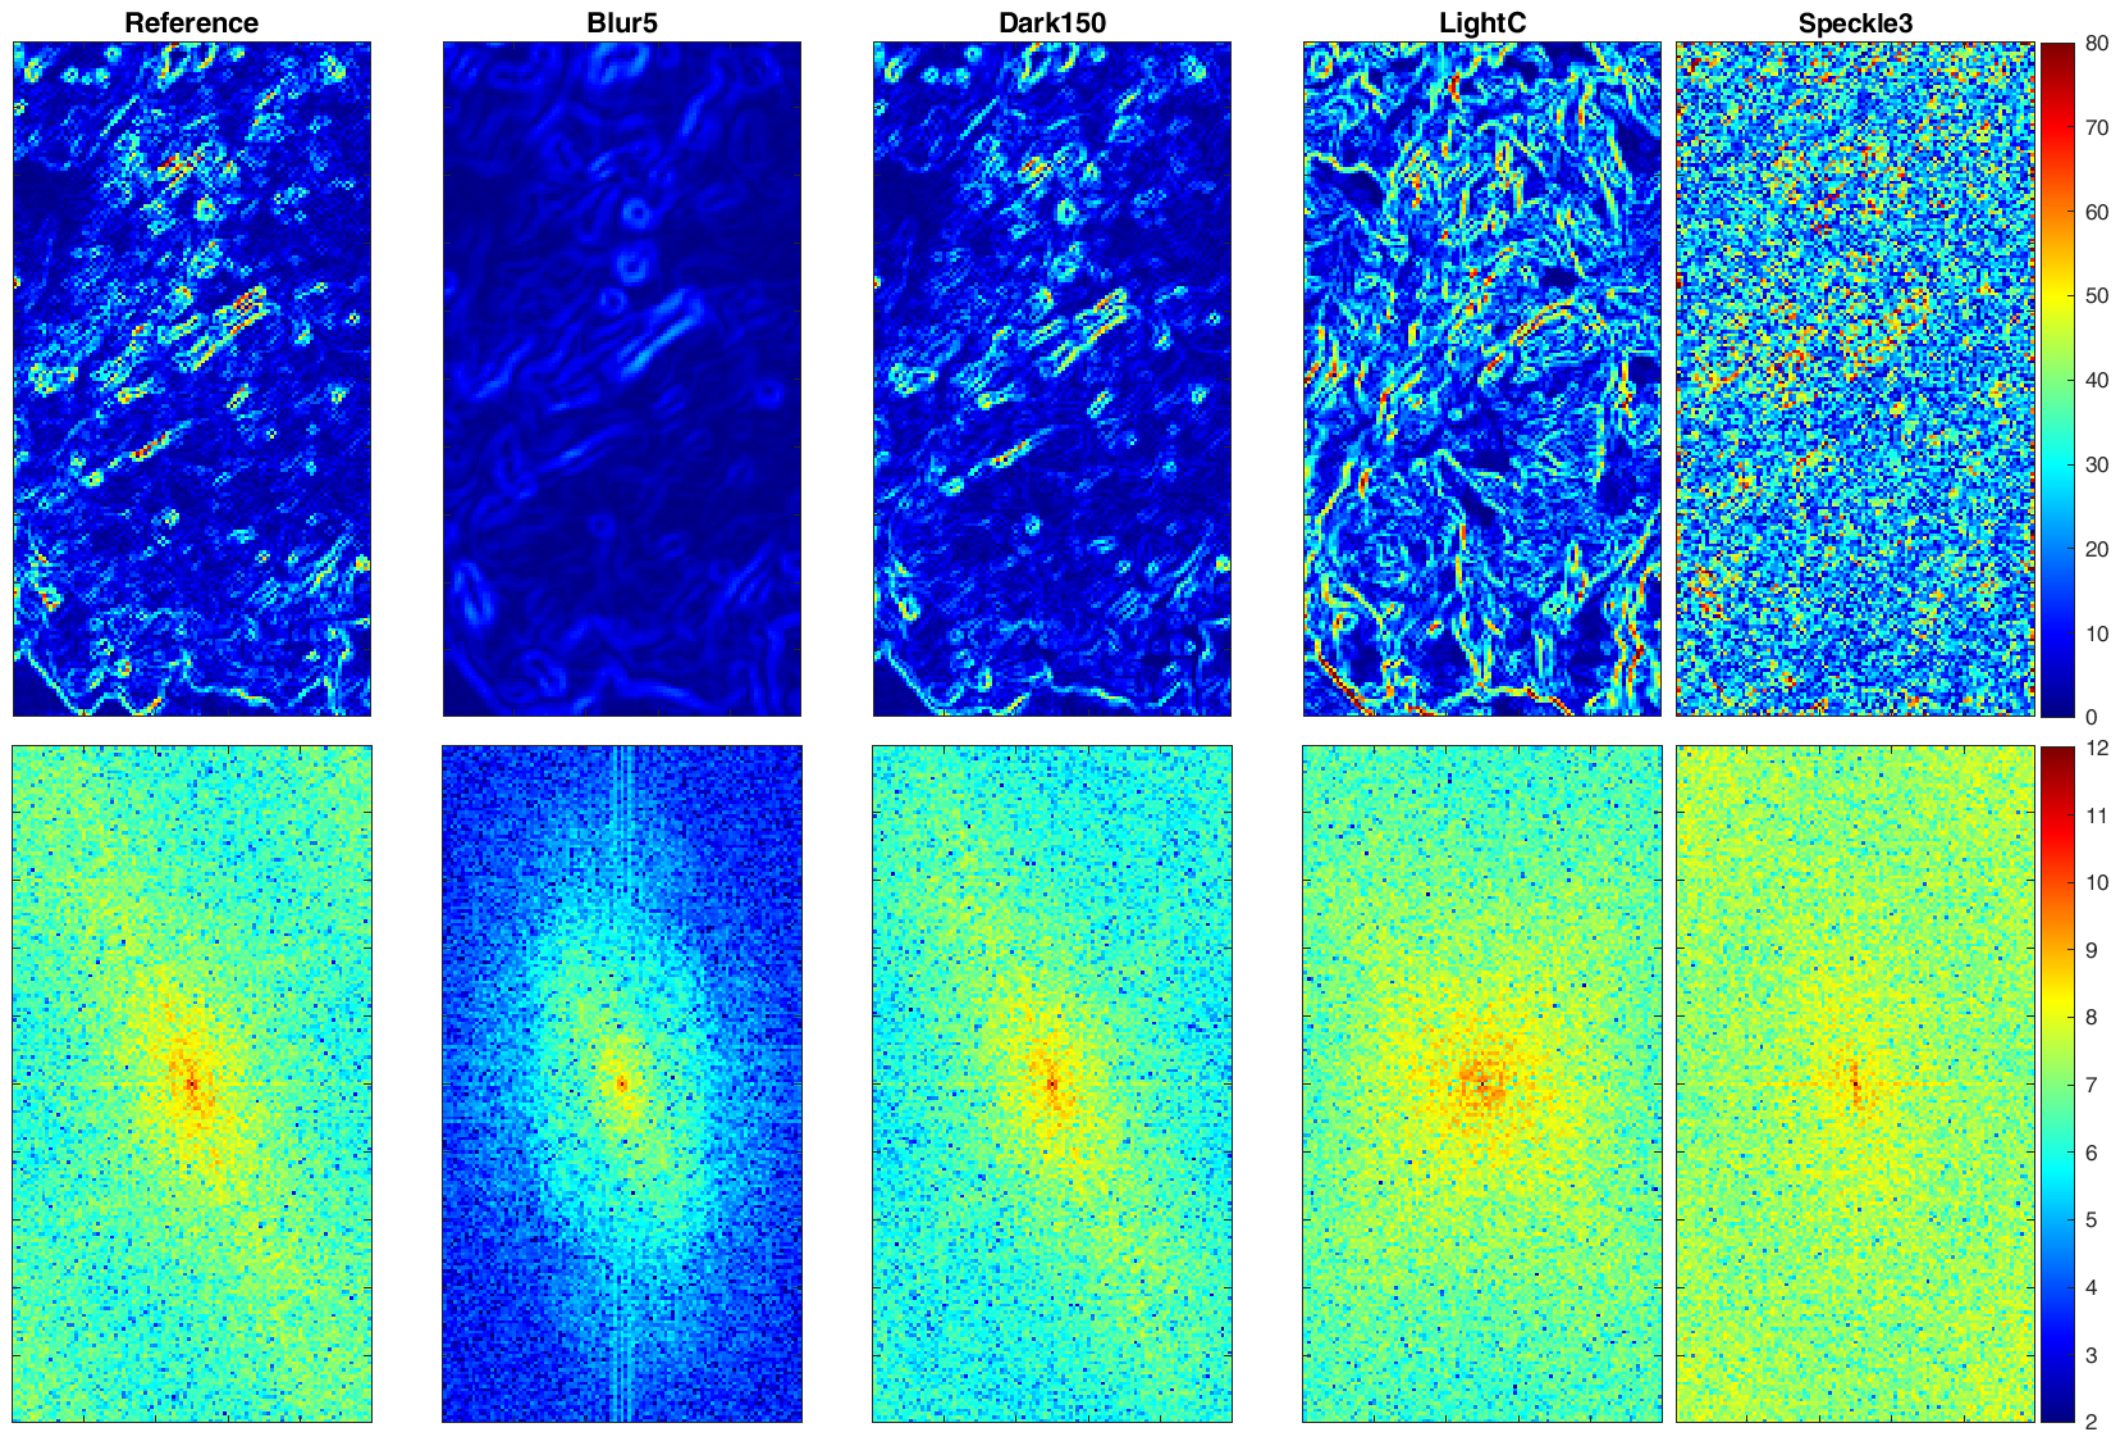

# ORIENTATION IMAGES AND CORRESPONDING POWER SPECTRA\*

\* Since the OR images are complex, they are represented as the angle (in radians) included between the real and imaginary components

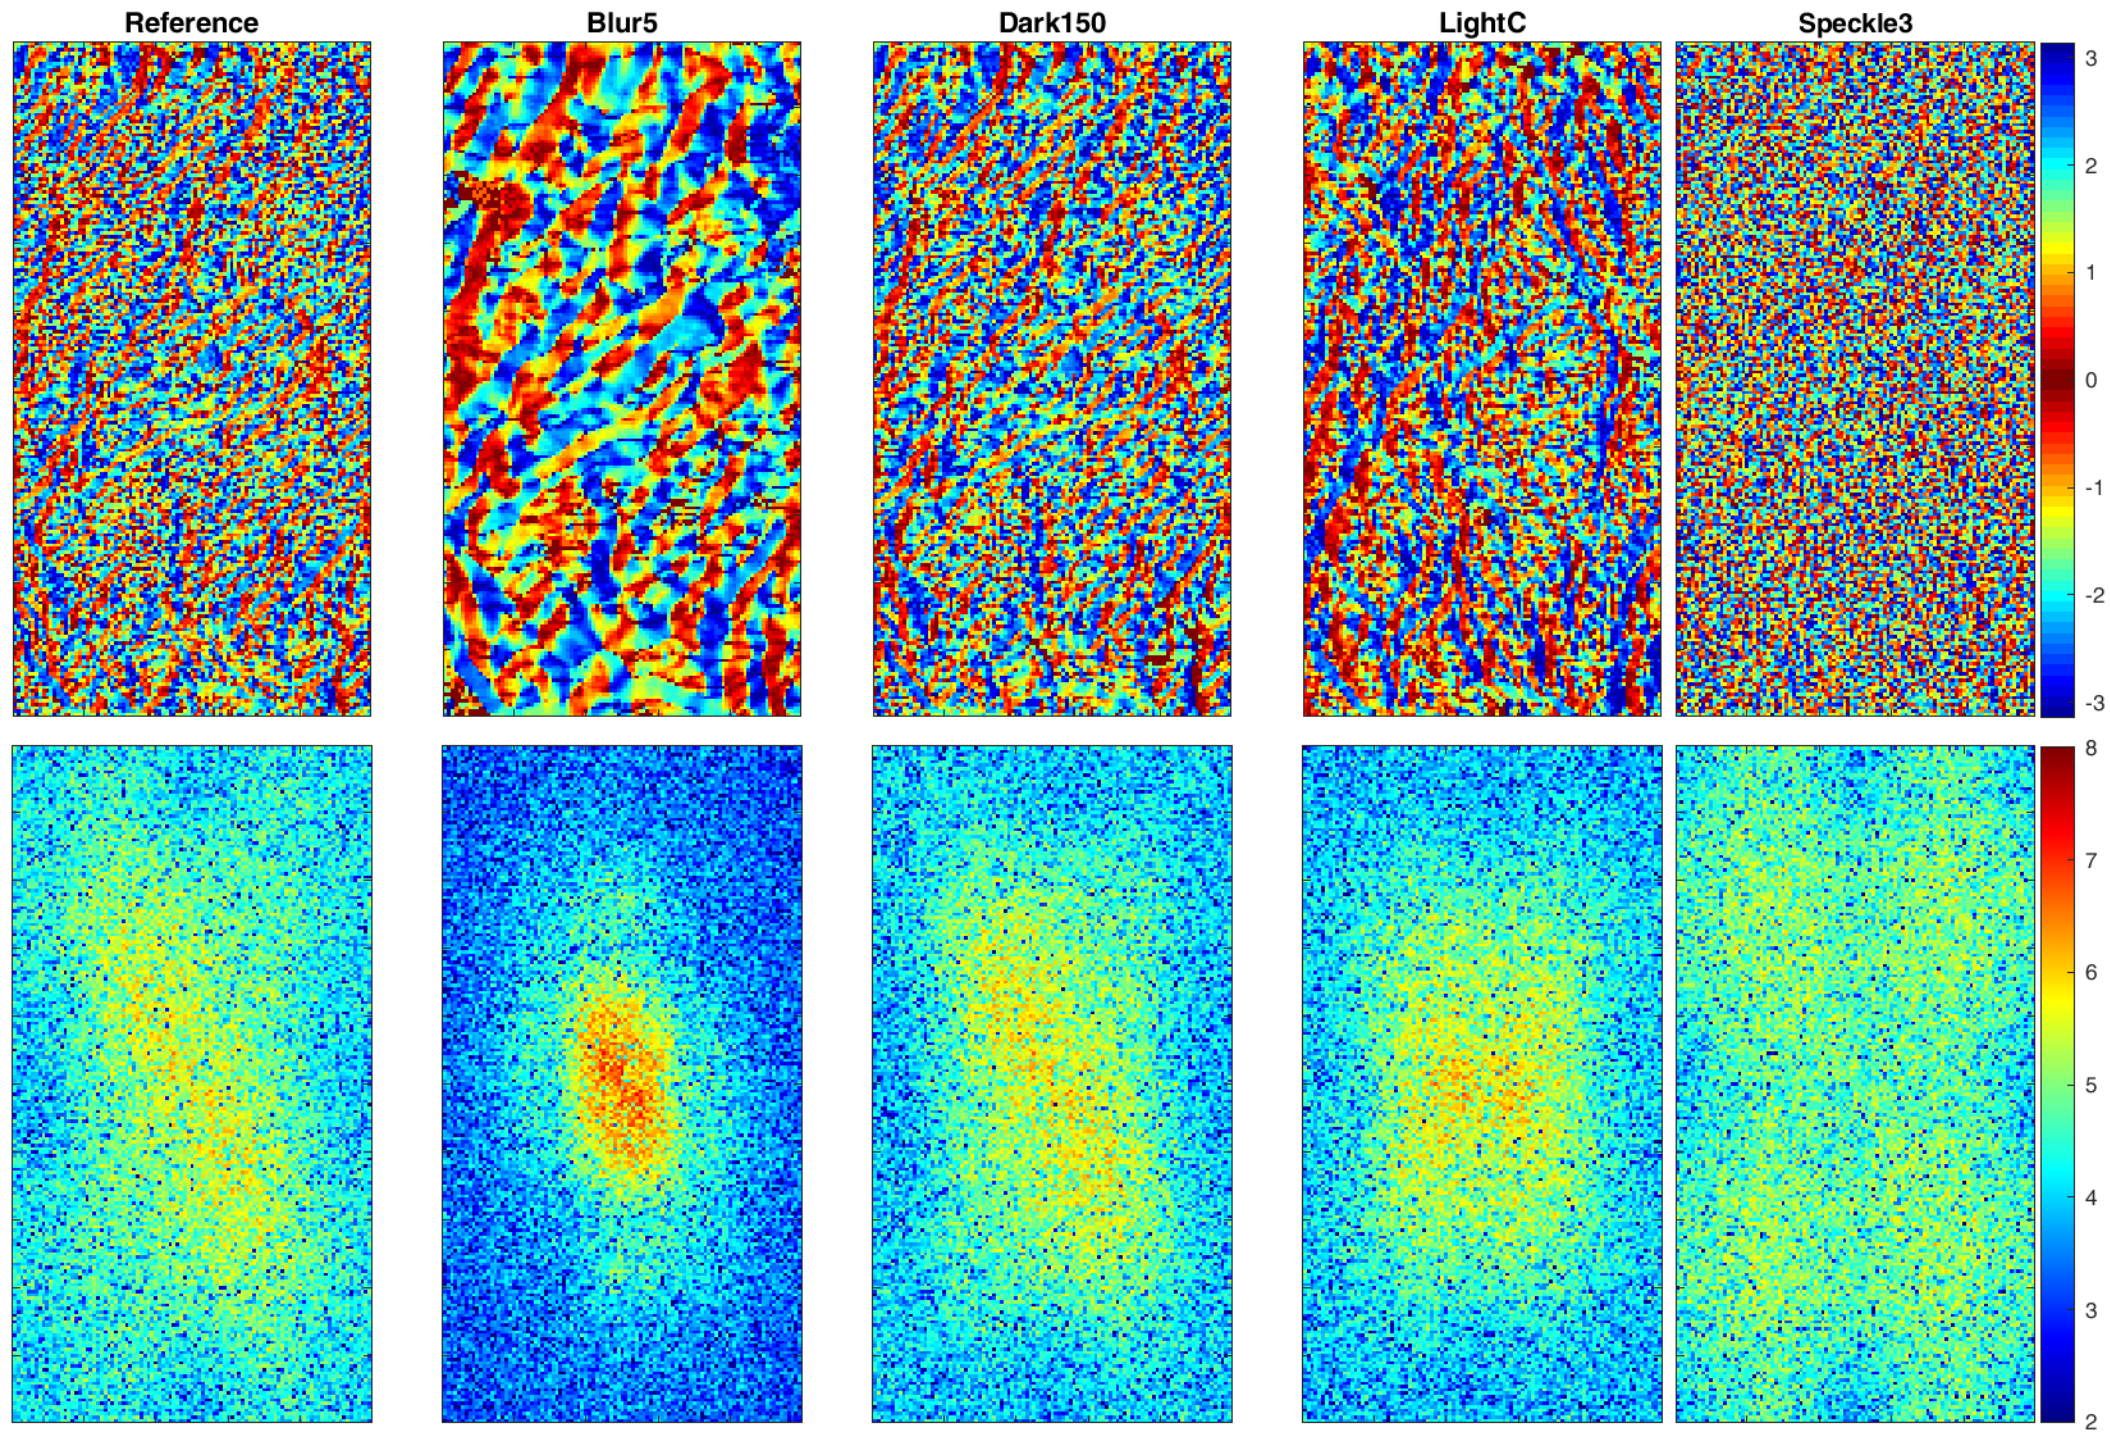

Supplement: s1 [file s1]
