# Supplementary material
Source: MDPI journal article supplement (https://www.mdpi.com/2072-4292/13/2/327)
Supplement: s1 [file s1]

Archive with 6 entries (6 files):
- S1 - area of study.pdf
- S2 - synthetic images.pdf
- S3 - displacement maps.pdf
- S4 - methods comparison.pdf
- S5 - spectra.pdf
- S6 - results of real images.pdf
