# Supplementary material
Source: MDPI journal article supplement (https://www.mdpi.com/2072-4292/13/2/327)
Supplement: s1 [file s1 › S1 - area of study.pdf]

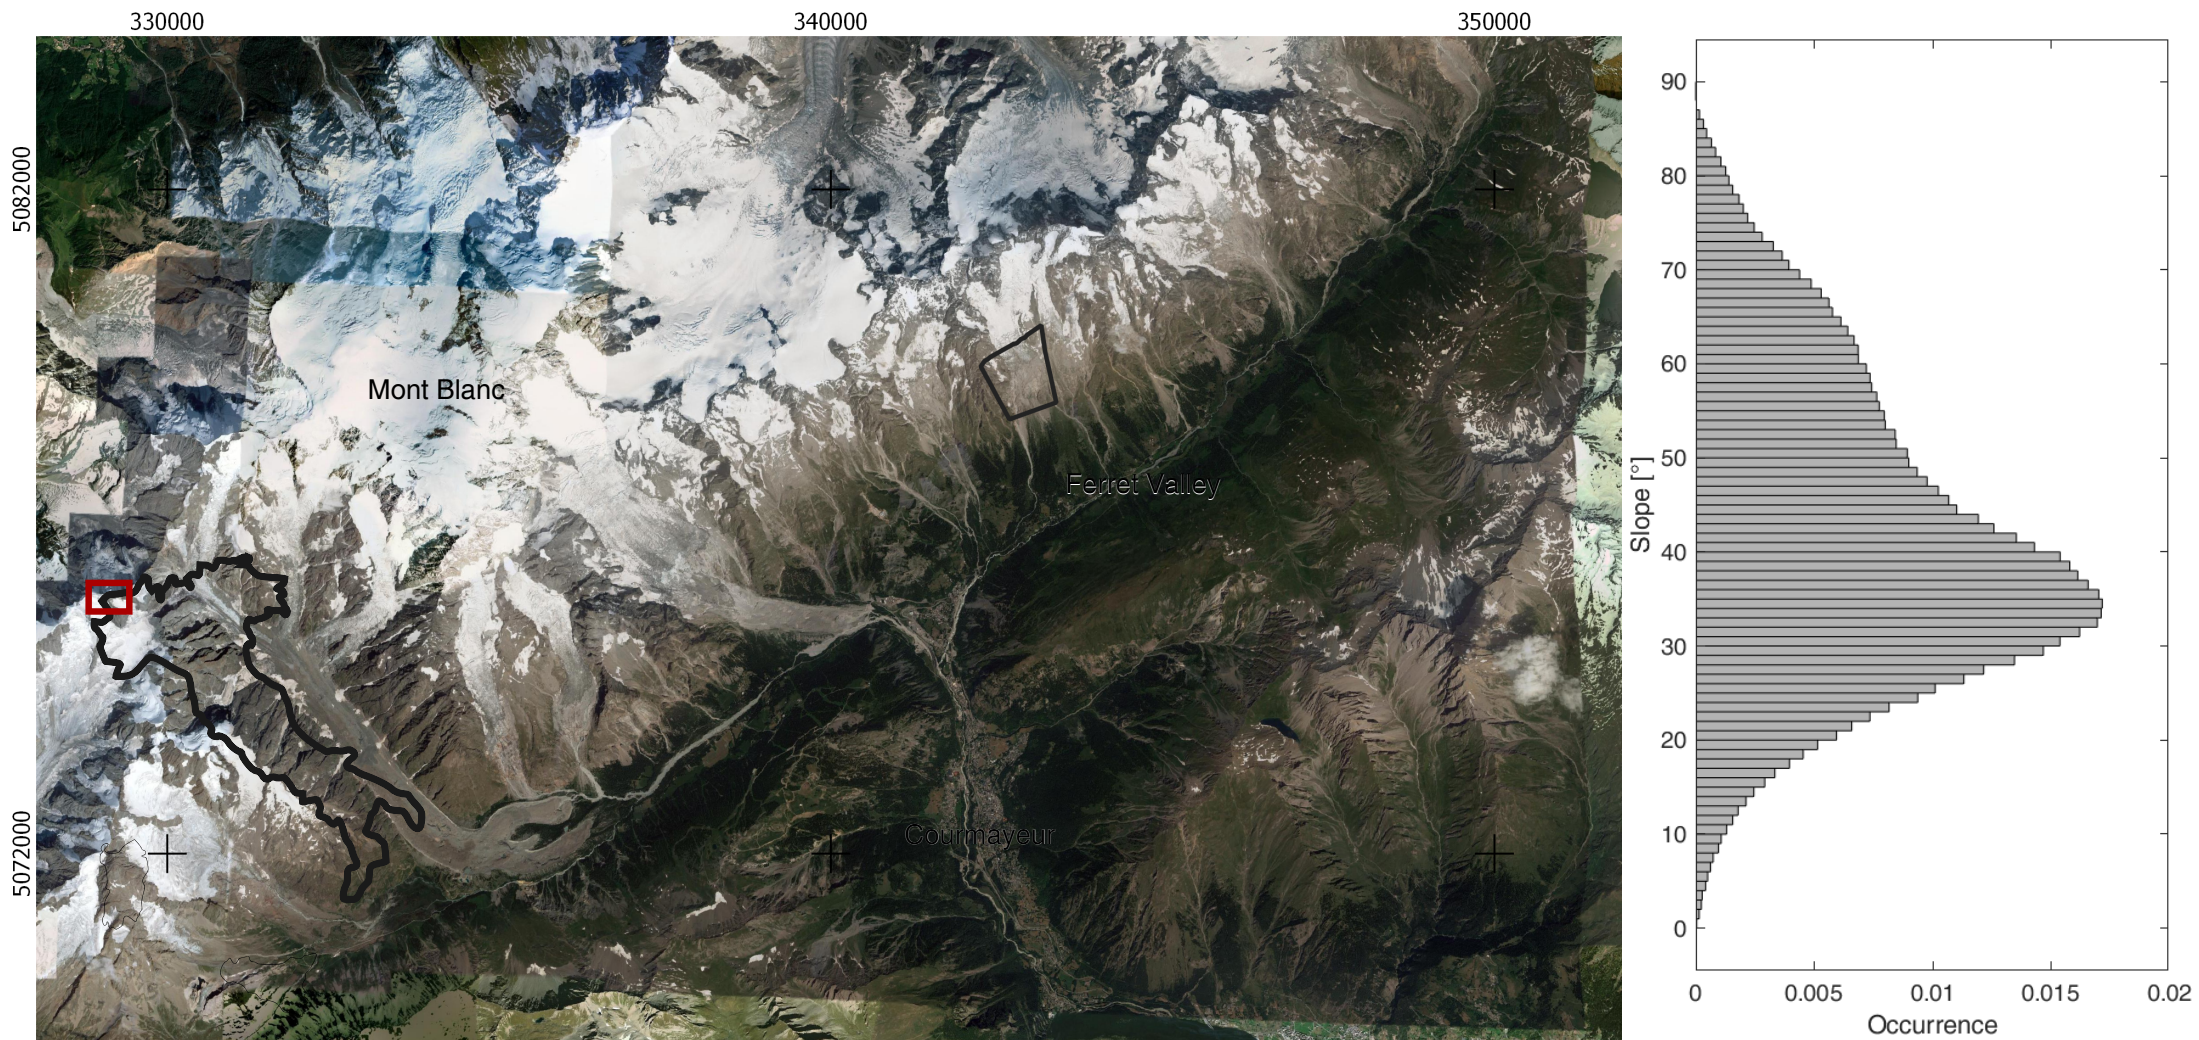

Area of study. The DTM used to create the synthetic images concerns a portion of the left side of the Ferret Valley (Italy), in the Mont Blanc area. The extension of the DTM is 1.6 km approximately and it has a resolution of 1 m. The slope distribution of the DTM is shown in the right panel. The area corresponding to the DTM is delimited in black in the map.
