# Supplementary material
Source: MDPI journal article supplement (https://www.mdpi.com/2072-4292/13/2/327)

# Outcomes of the DIC applied to the images of the Planpincieux Glacier

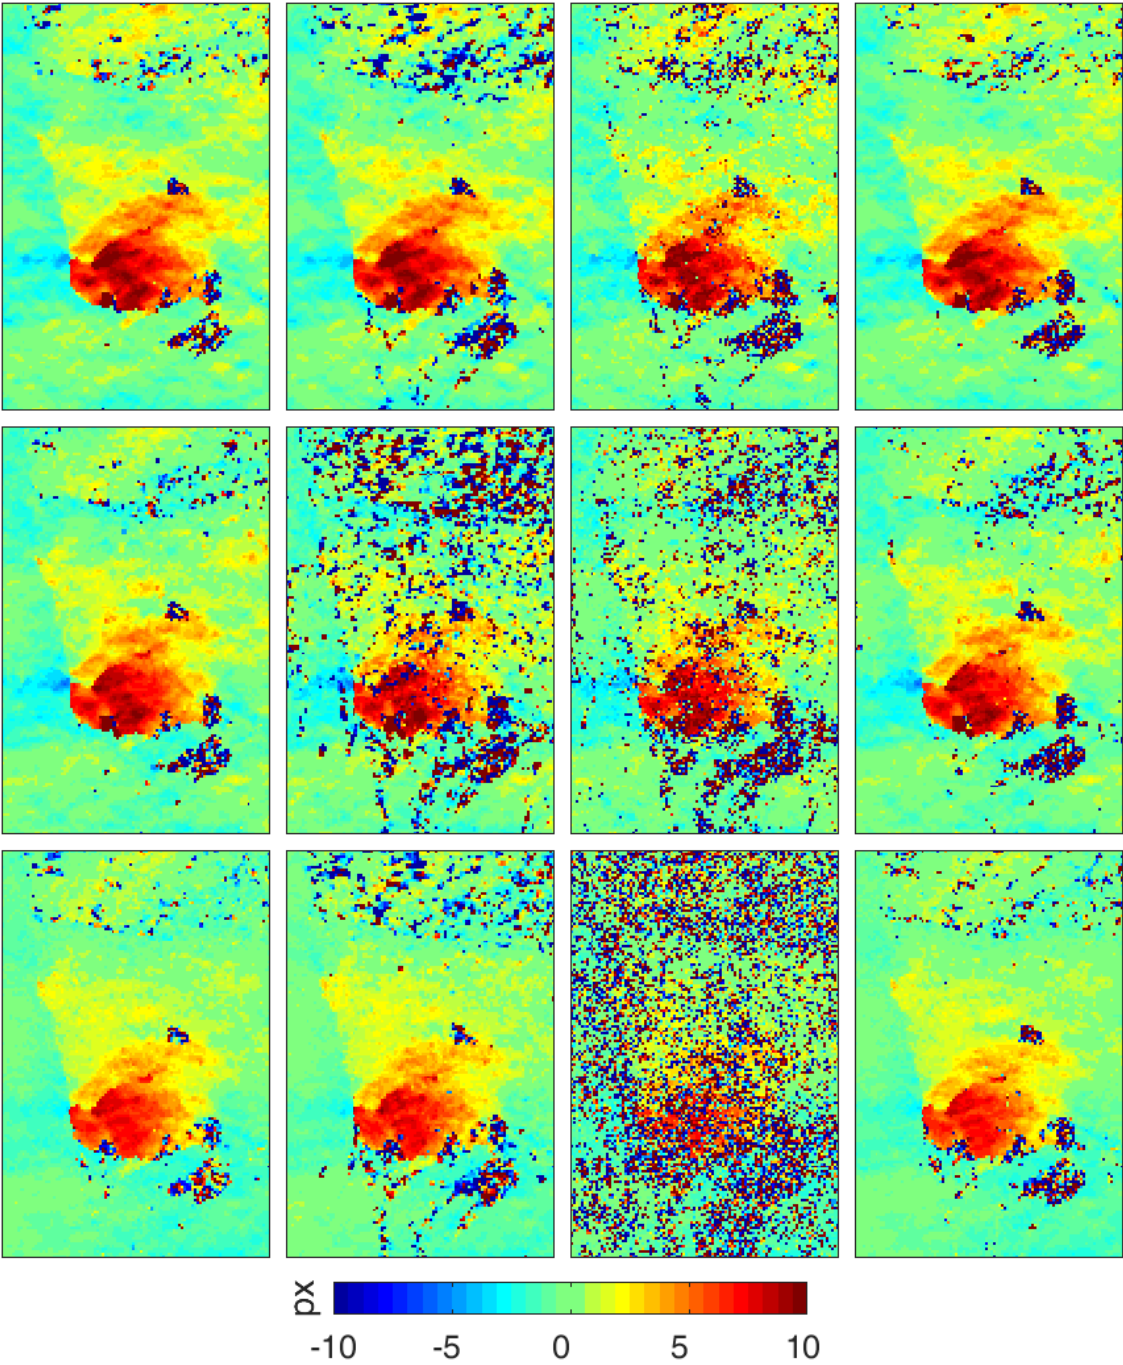

| VERTICAL COMPONENT |        |         |       |        |
|--------------------|--------|---------|-------|--------|
| Images             | Method |         |       |        |
| PGopt              | DOT-OR | ZNCC-IN | PC-GR | FFT-OR |
| PGlight            | DOT-OR | ZNCC-IN | PC-GR | FFT-OR |
| PGblur             | DOT-OR | ZNCC-IN | PC-GR | FFT-OR |

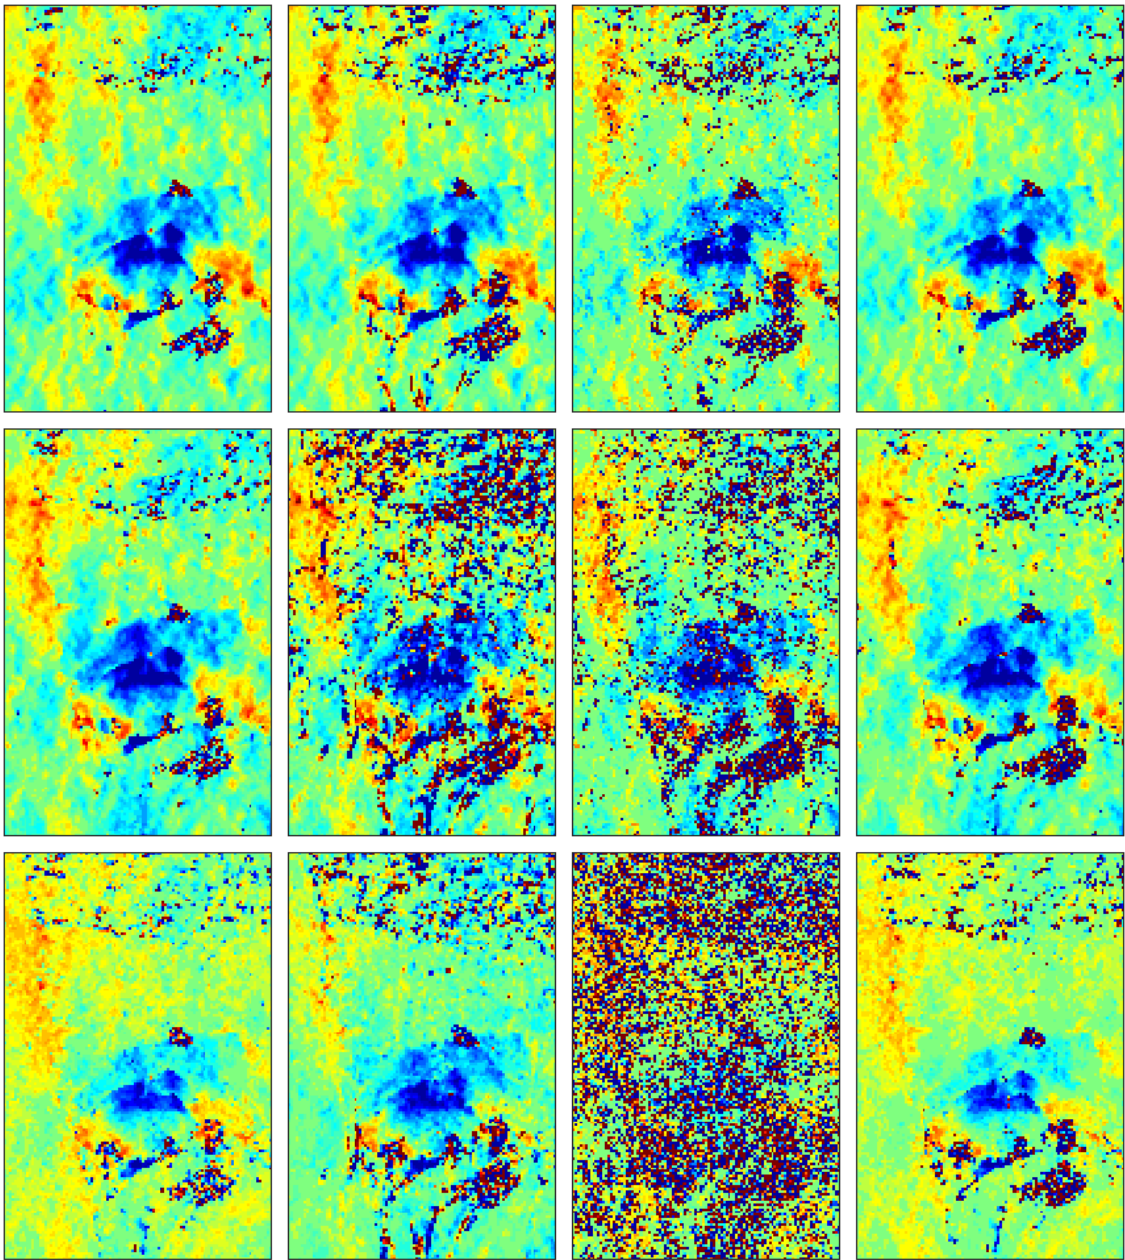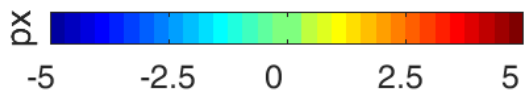

| HORIZONTAL COMPONENT |        |         |       |        |
|----------------------|--------|---------|-------|--------|
| Images               | Method |         |       |        |
| PGopt                | DOT-OR | ZNCC-IN | PC-GR | FFT-OR |
| PGlight              | DOT-OR | ZNCC-IN | PC-GR | FFT-OR |
| PGblur               | DOT-OR | ZNCC-IN | PC-GR | FFT-OR |

# Outcomes of the DIC applied to the images of the Bodélé Depression

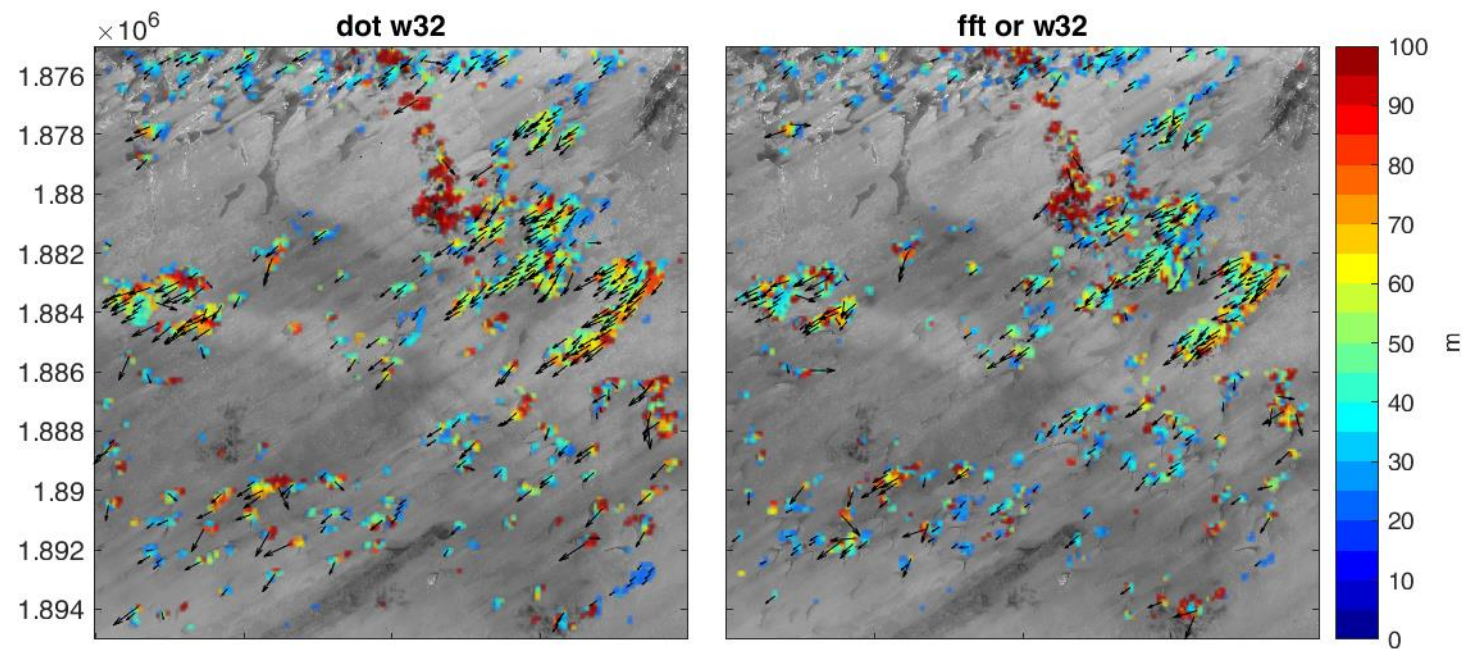

Template size 32x32

|         |        |
|---------|--------|
| DOT-OR  | FFT-OR |
| ZNCC-IN | PC-GR  |

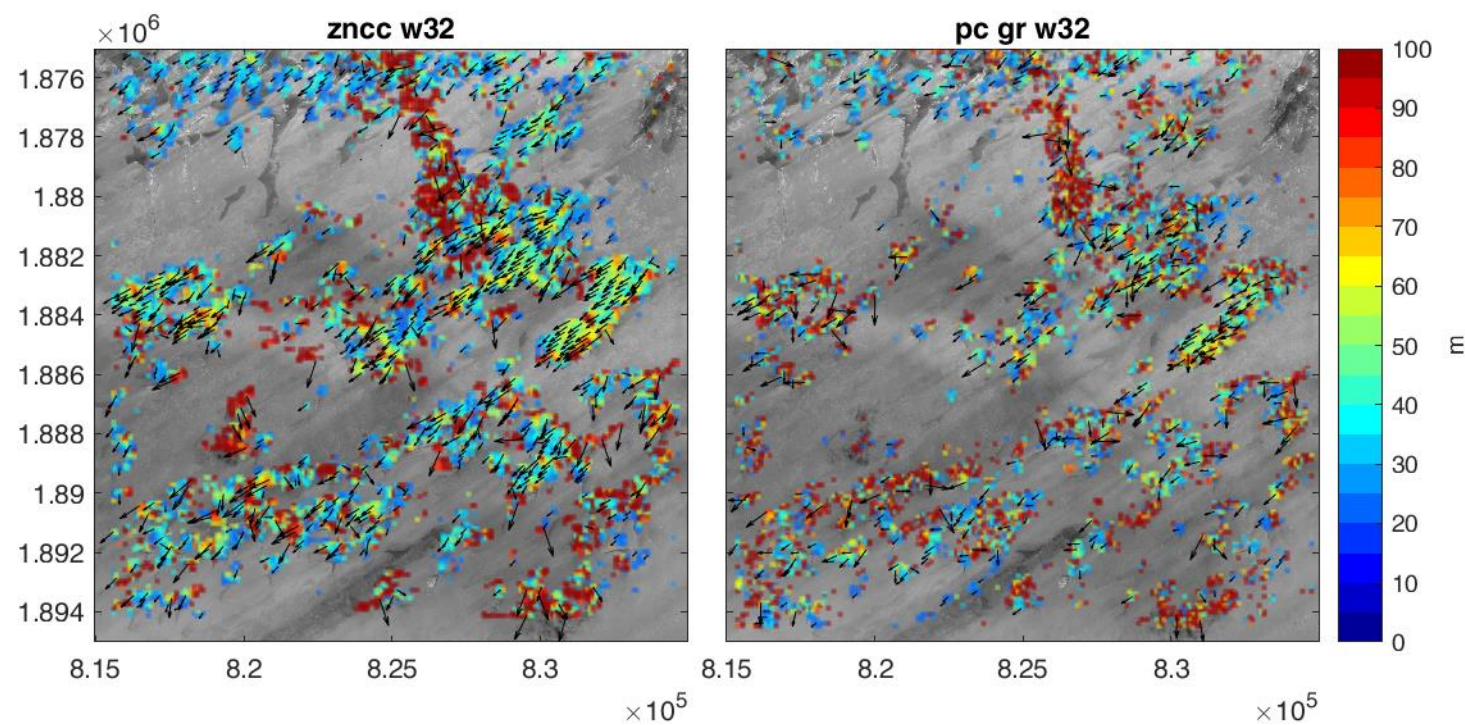

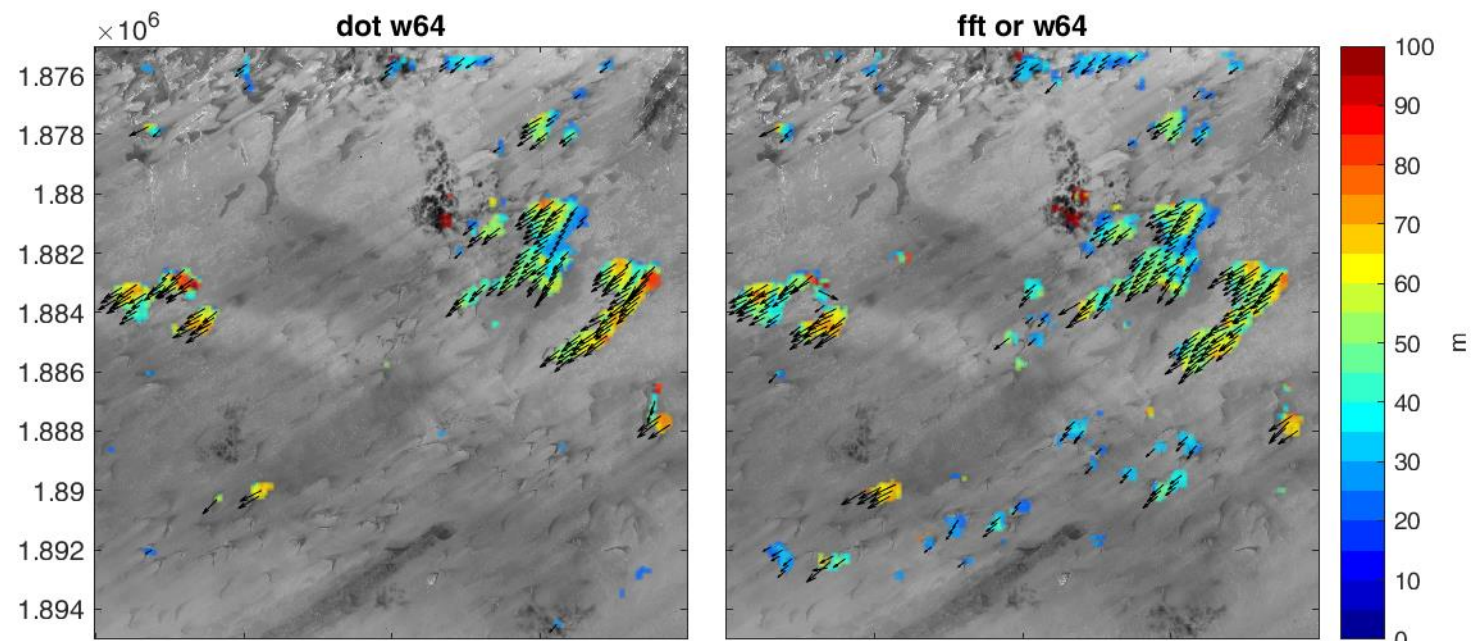

Template size 64x64

|         |        |
|---------|--------|
| DOT-OR  | FFT-OR |
| ZNCC-IN | PC-GR  |

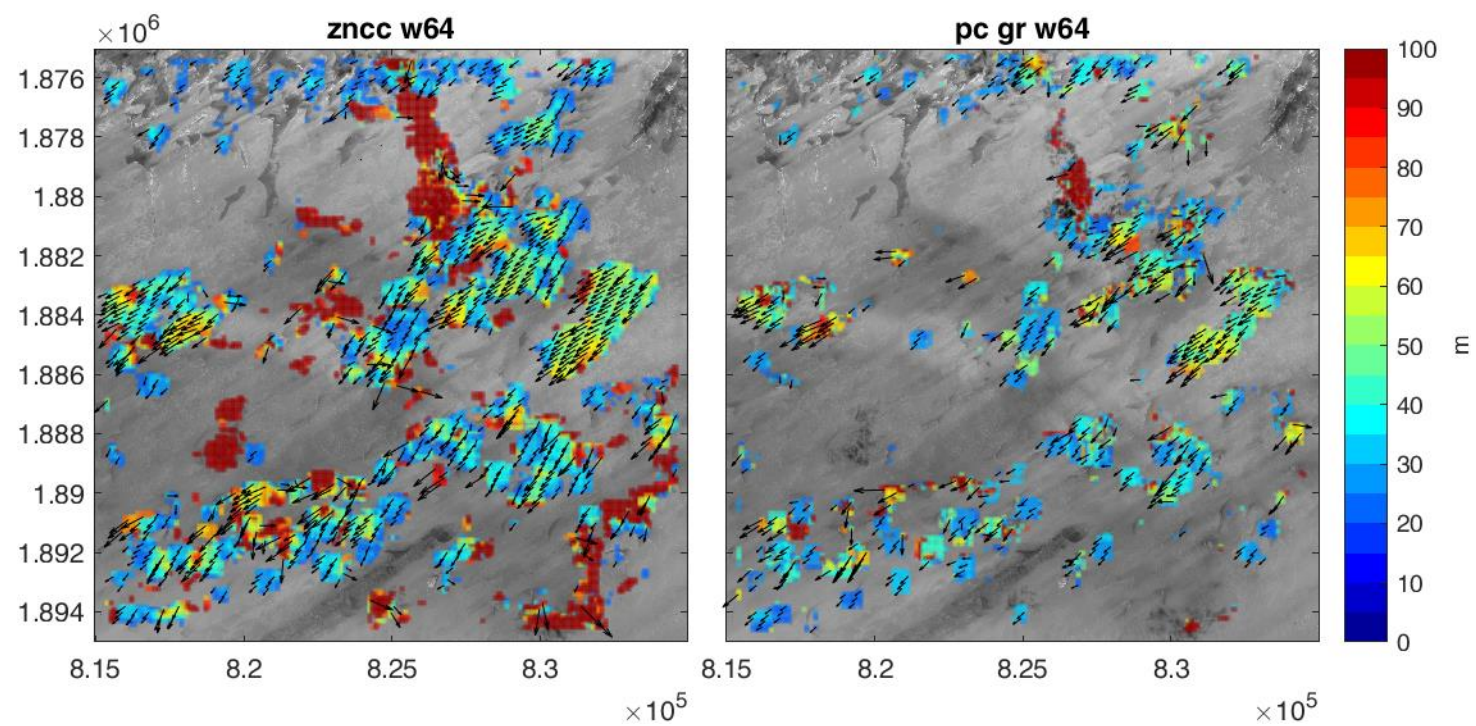

Supplement: s1 [file s1 › S6 - results of real images.pdf]
