# Supplementary material
Source: MDPI journal article supplement (https://www.mdpi.com/2072-4292/13/2/327)

Template size 8x8

# motlm

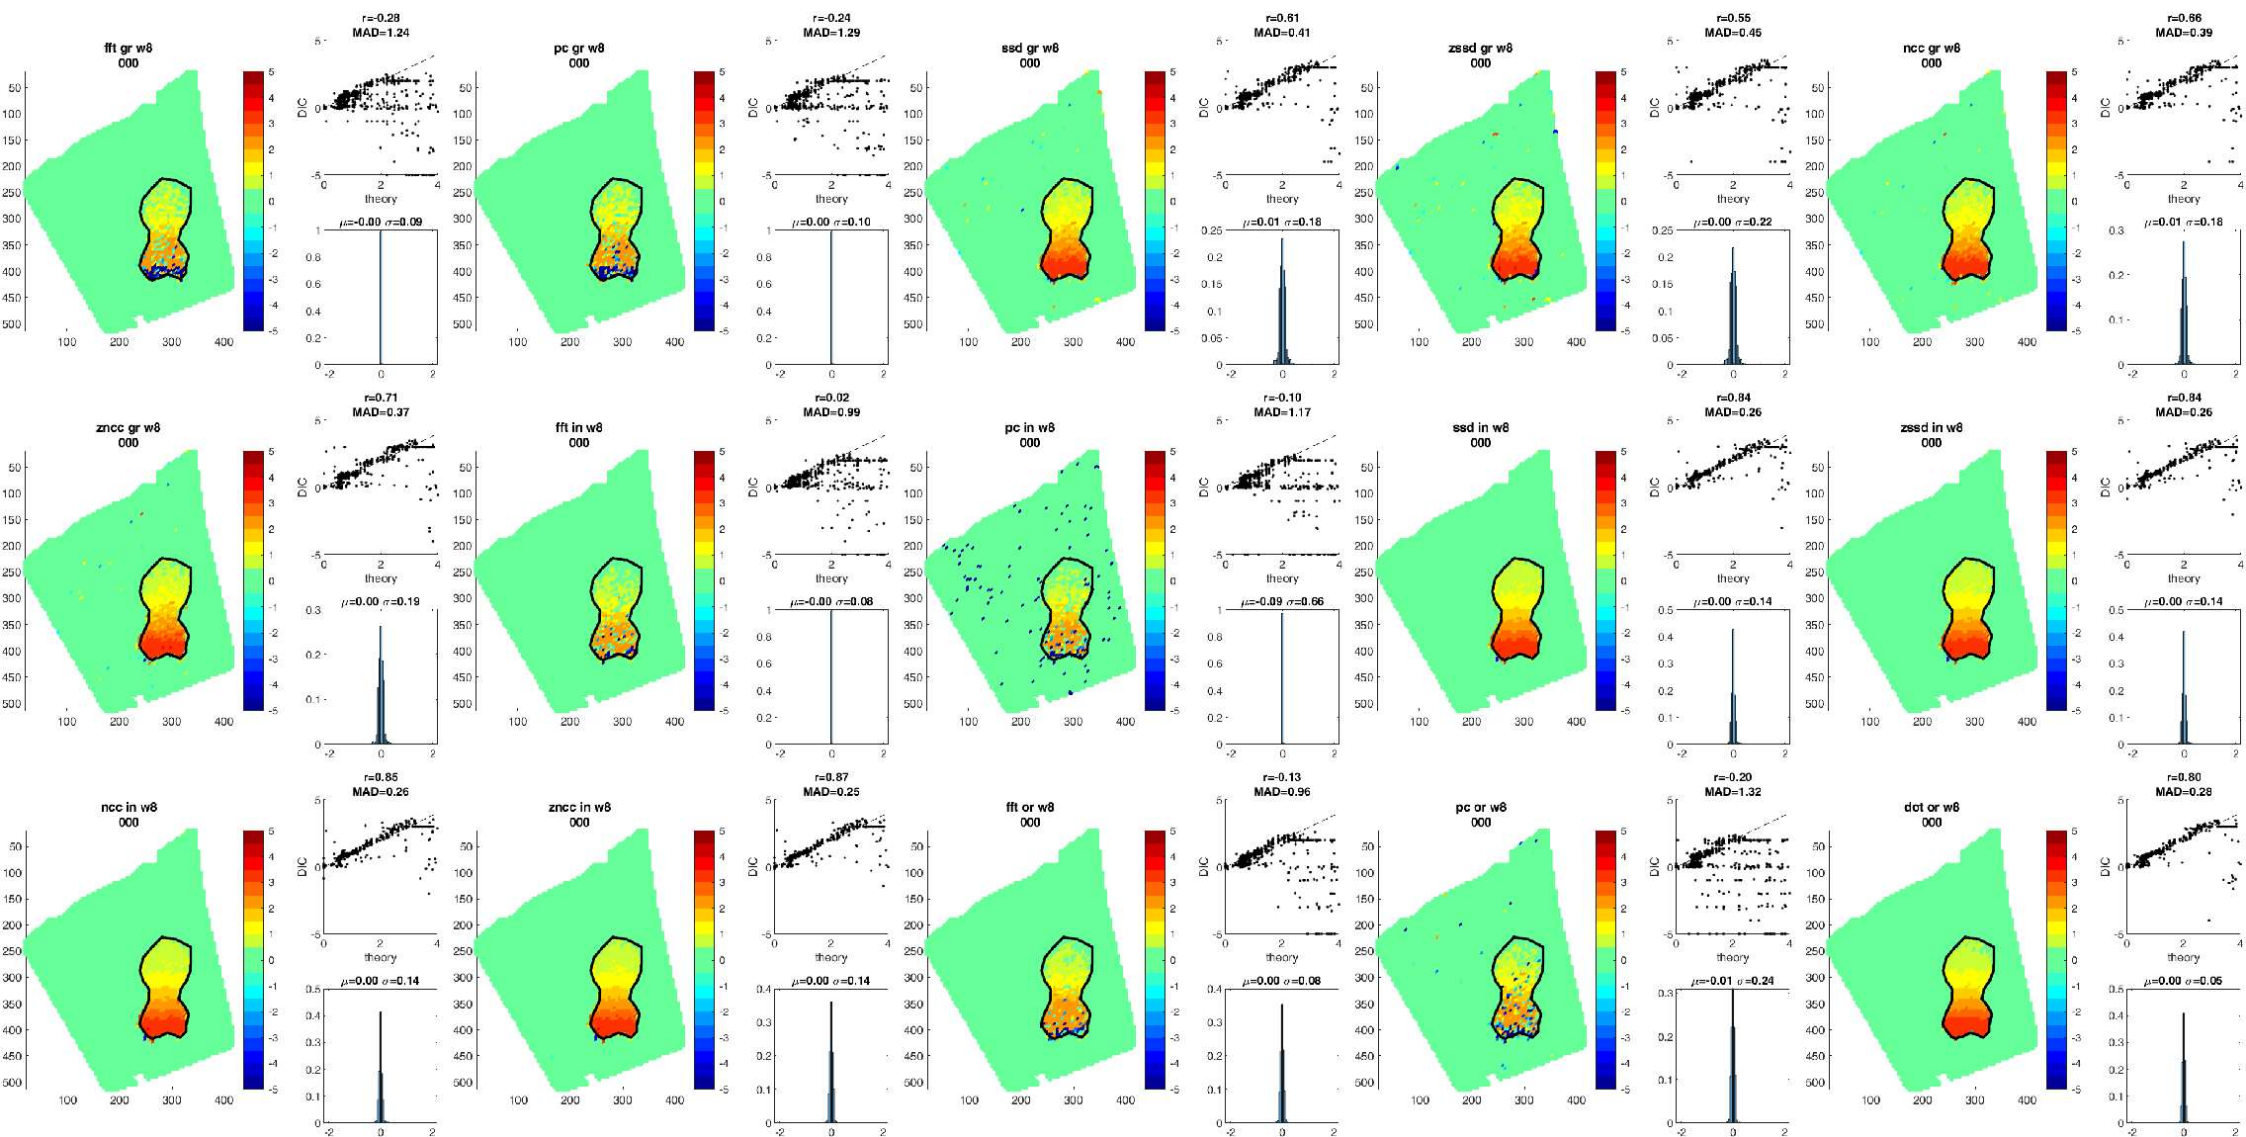

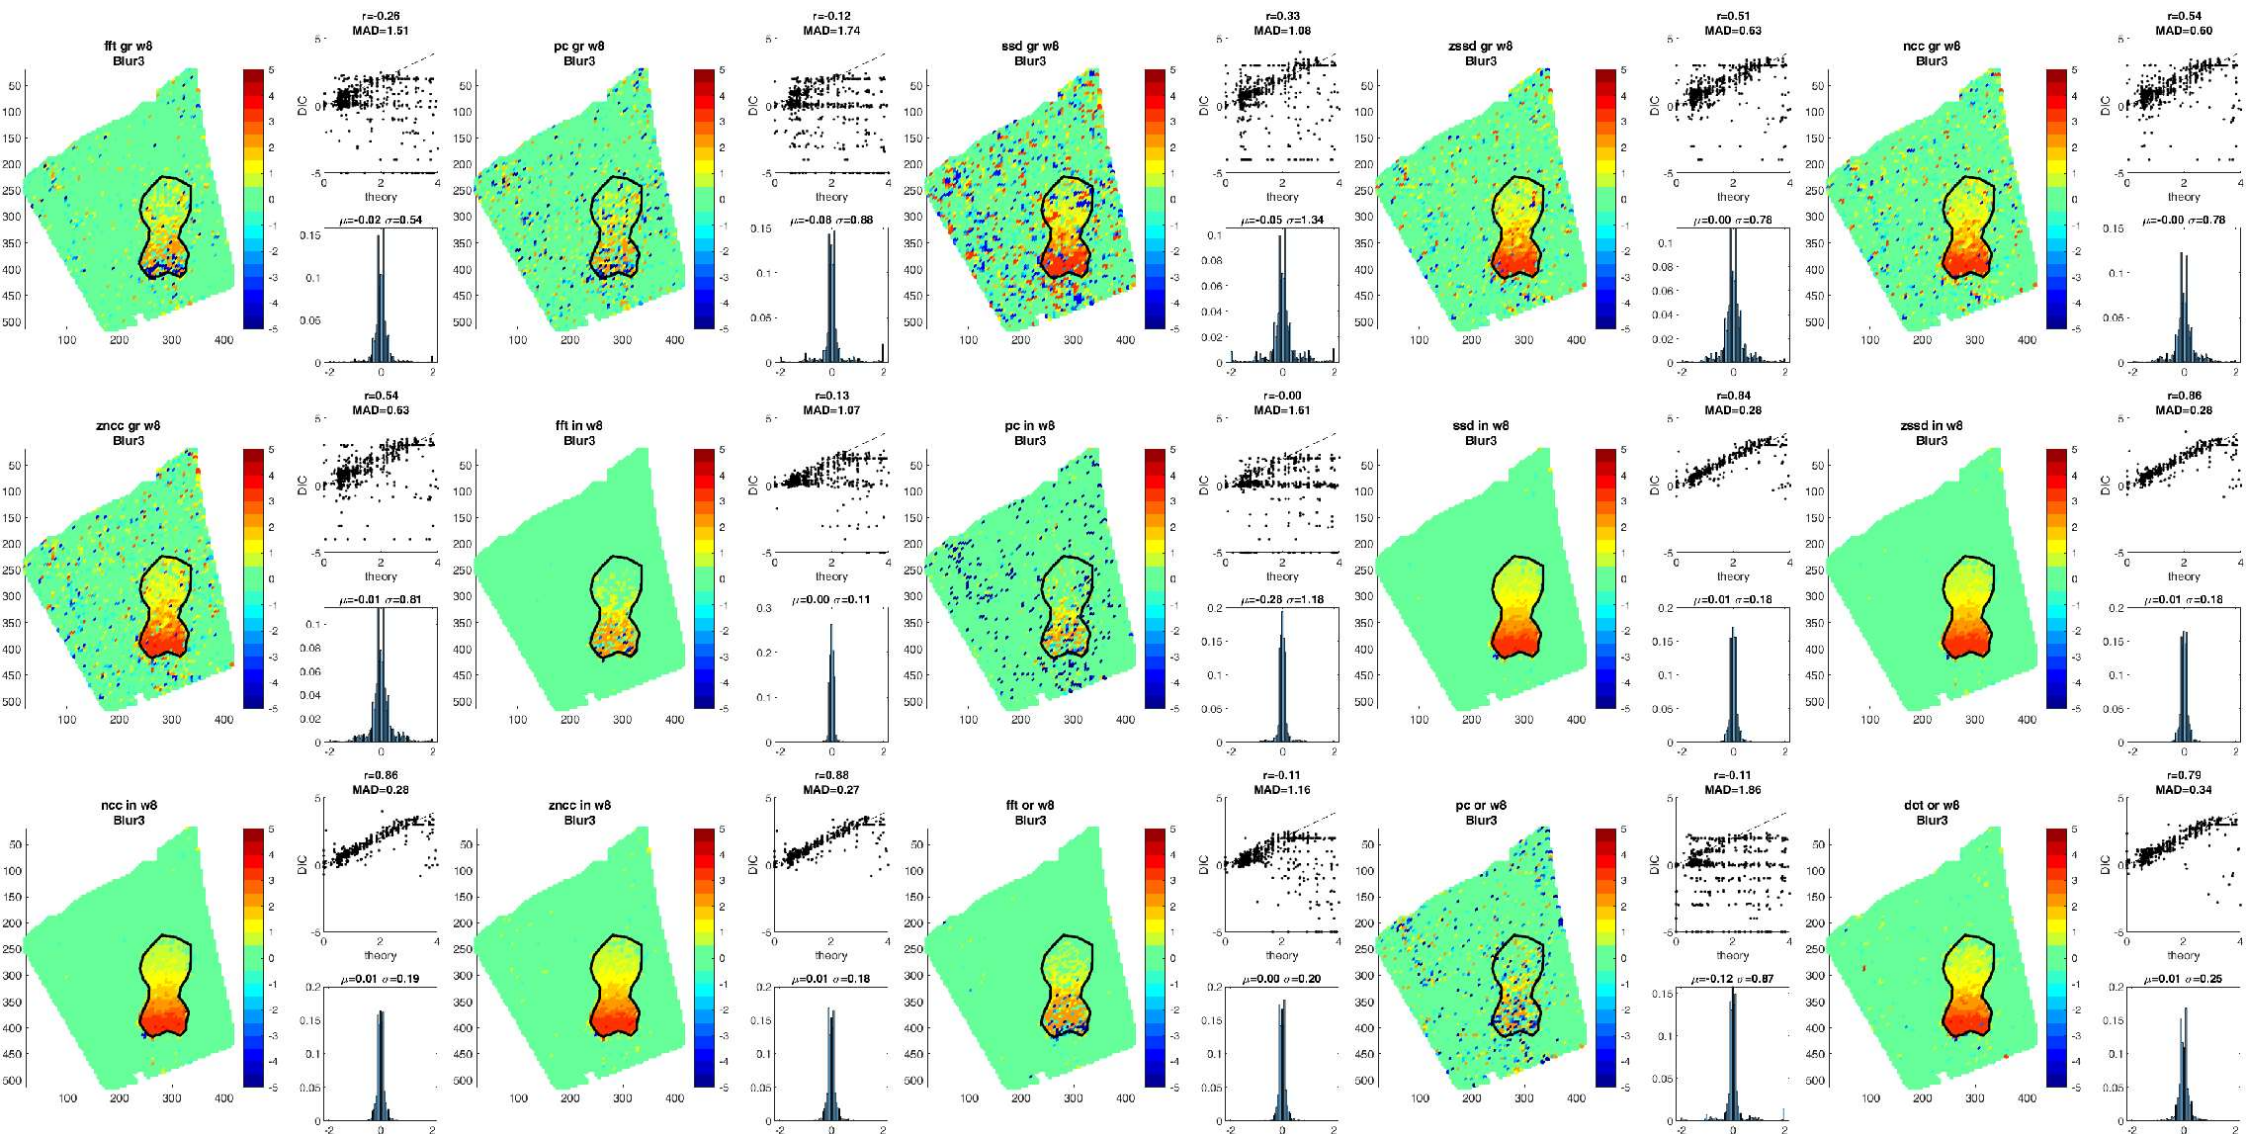



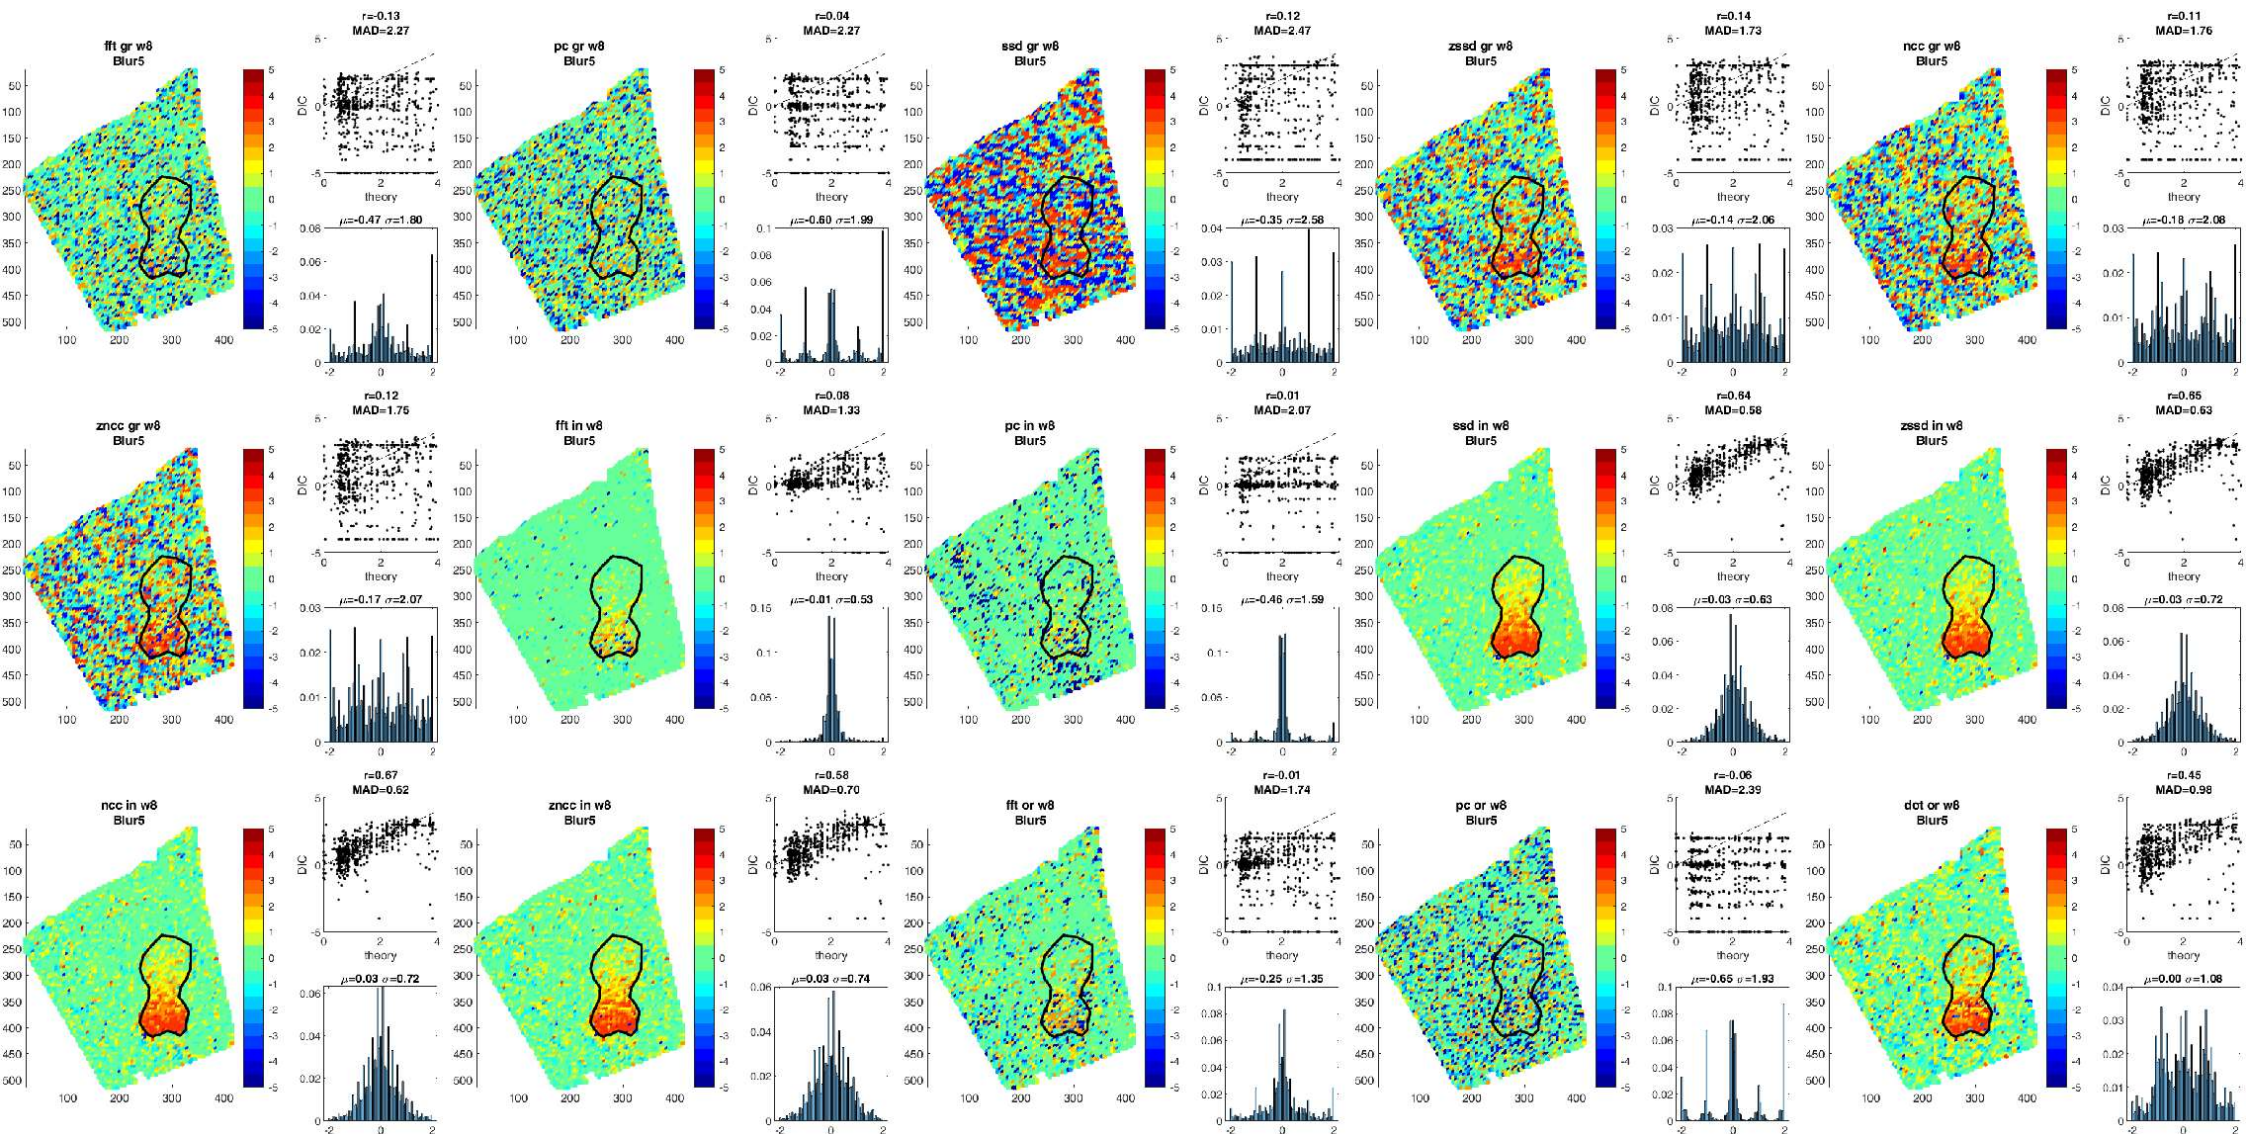



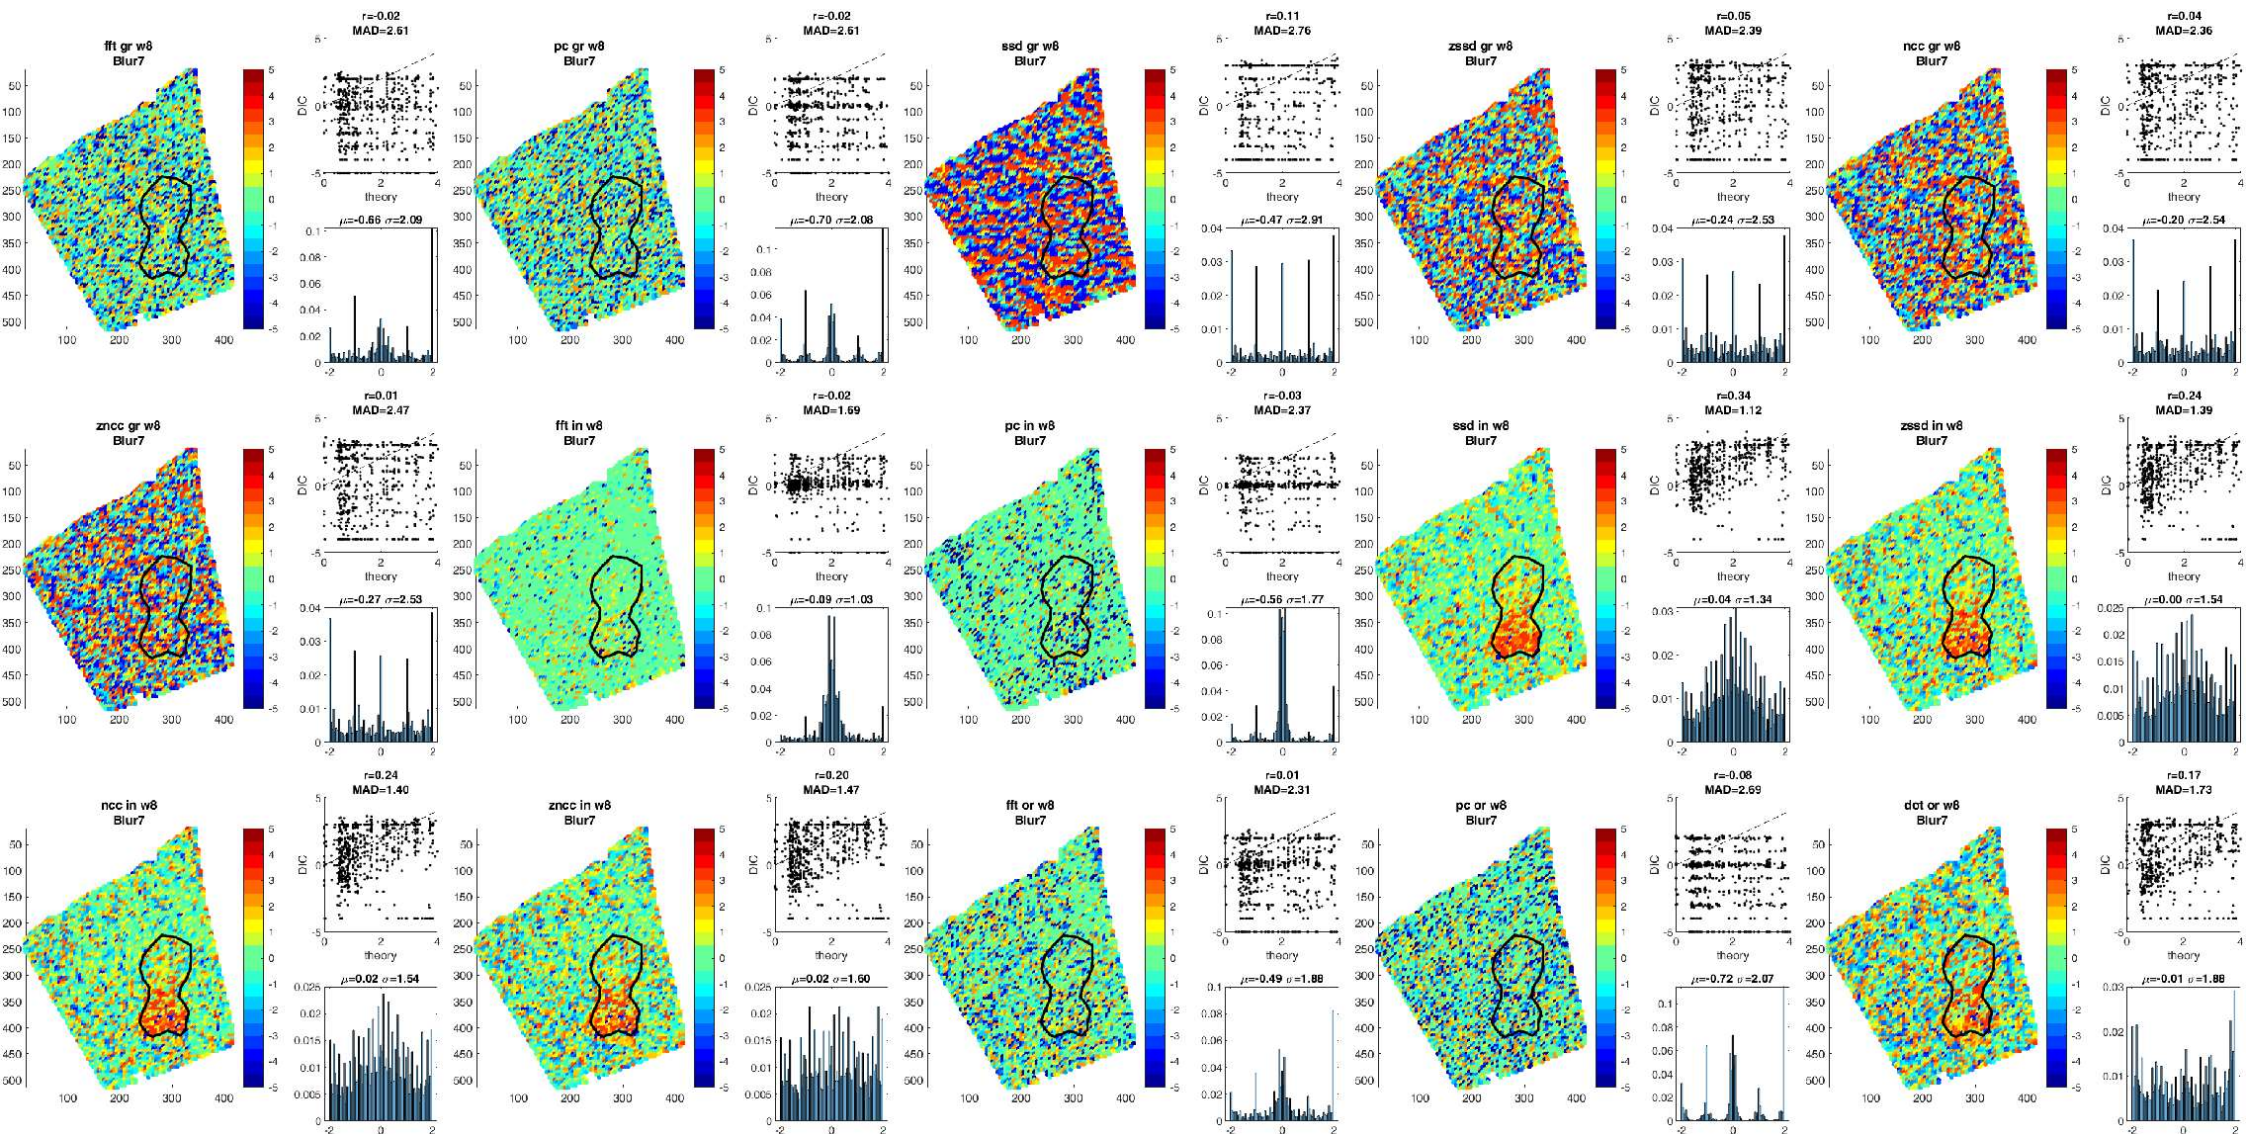



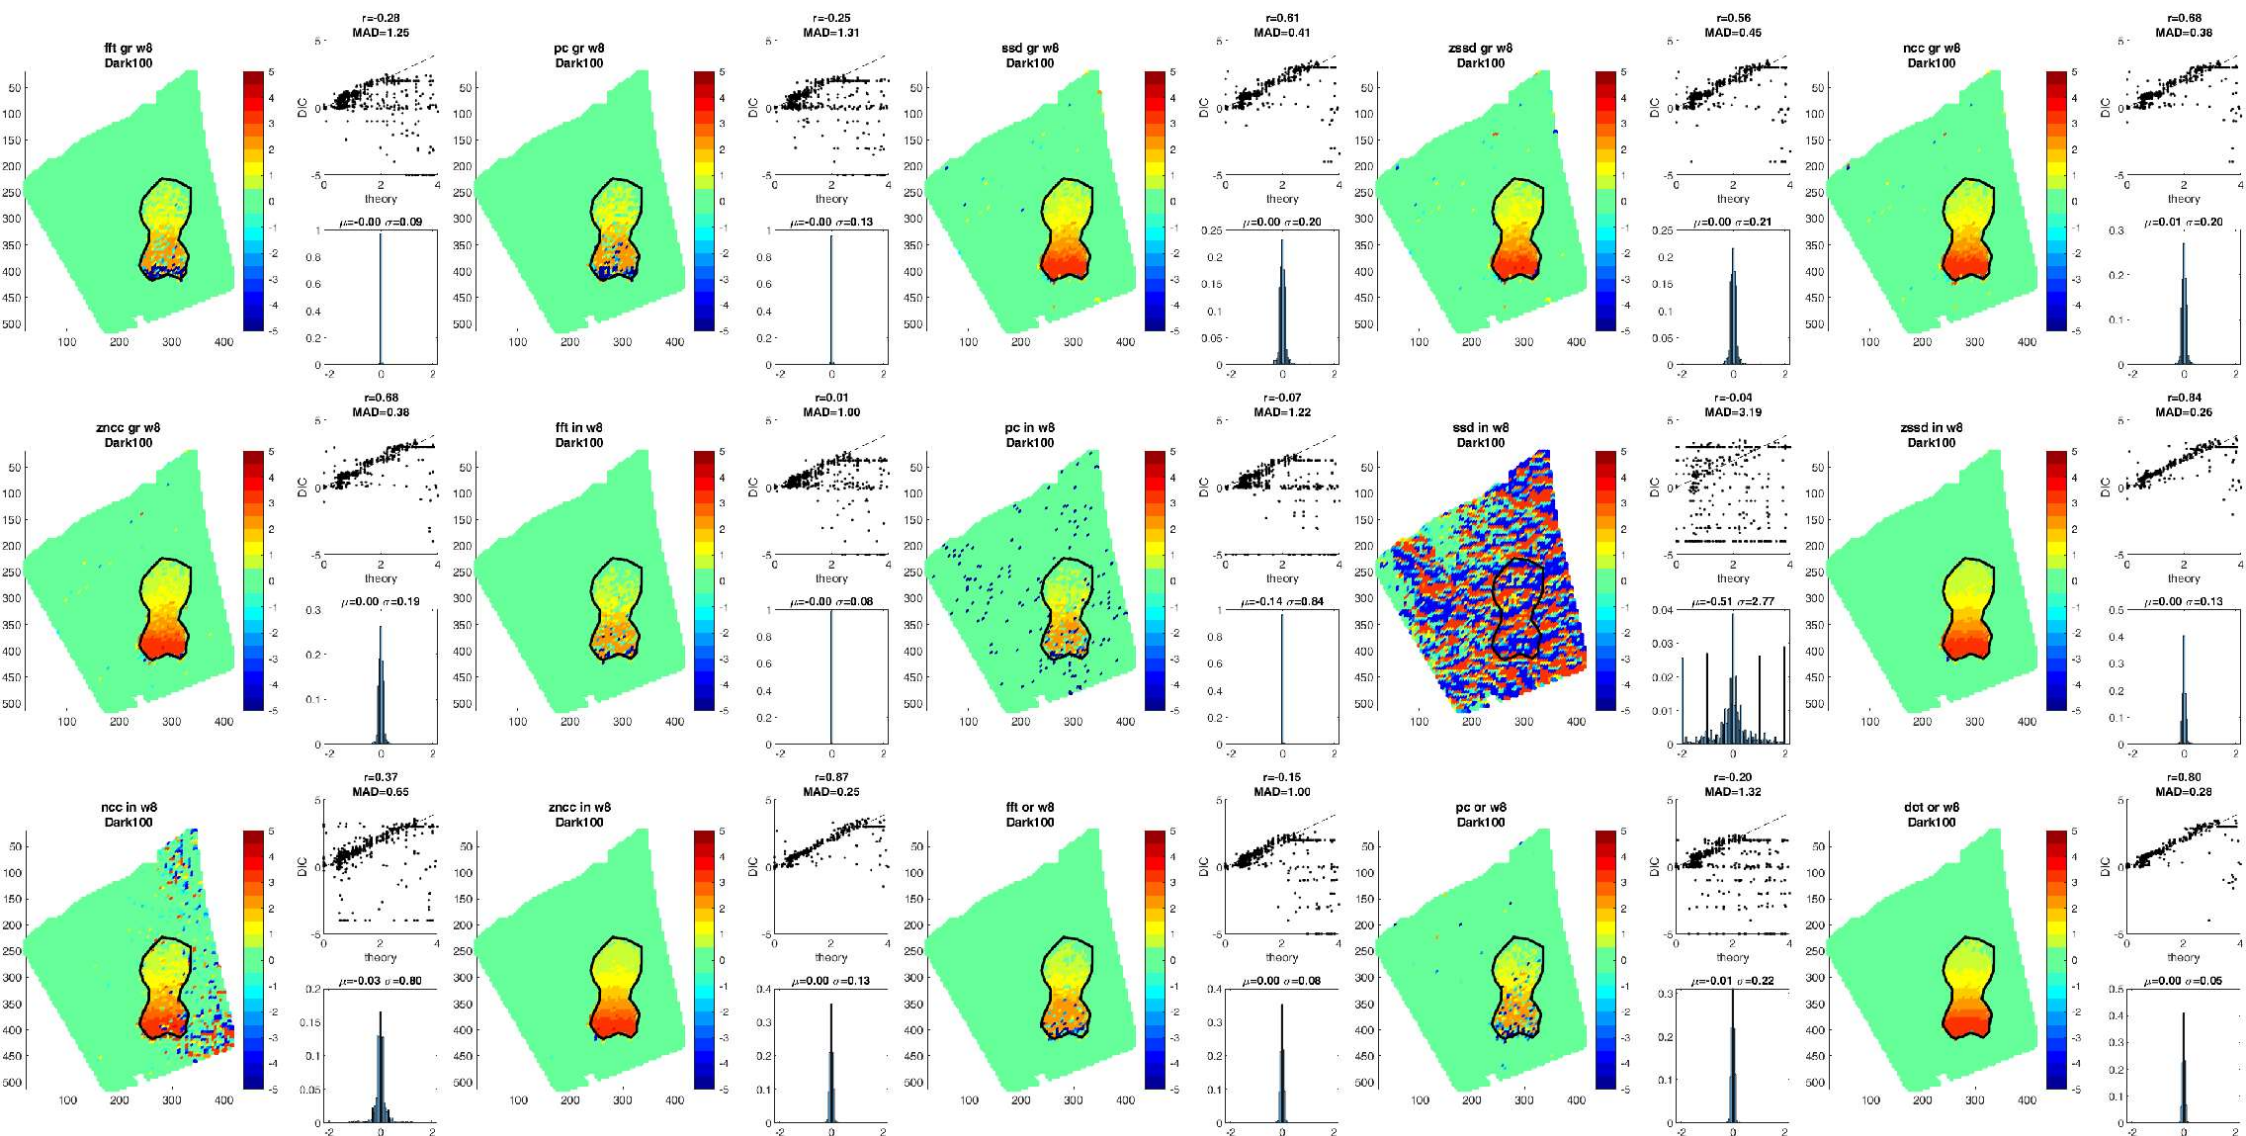



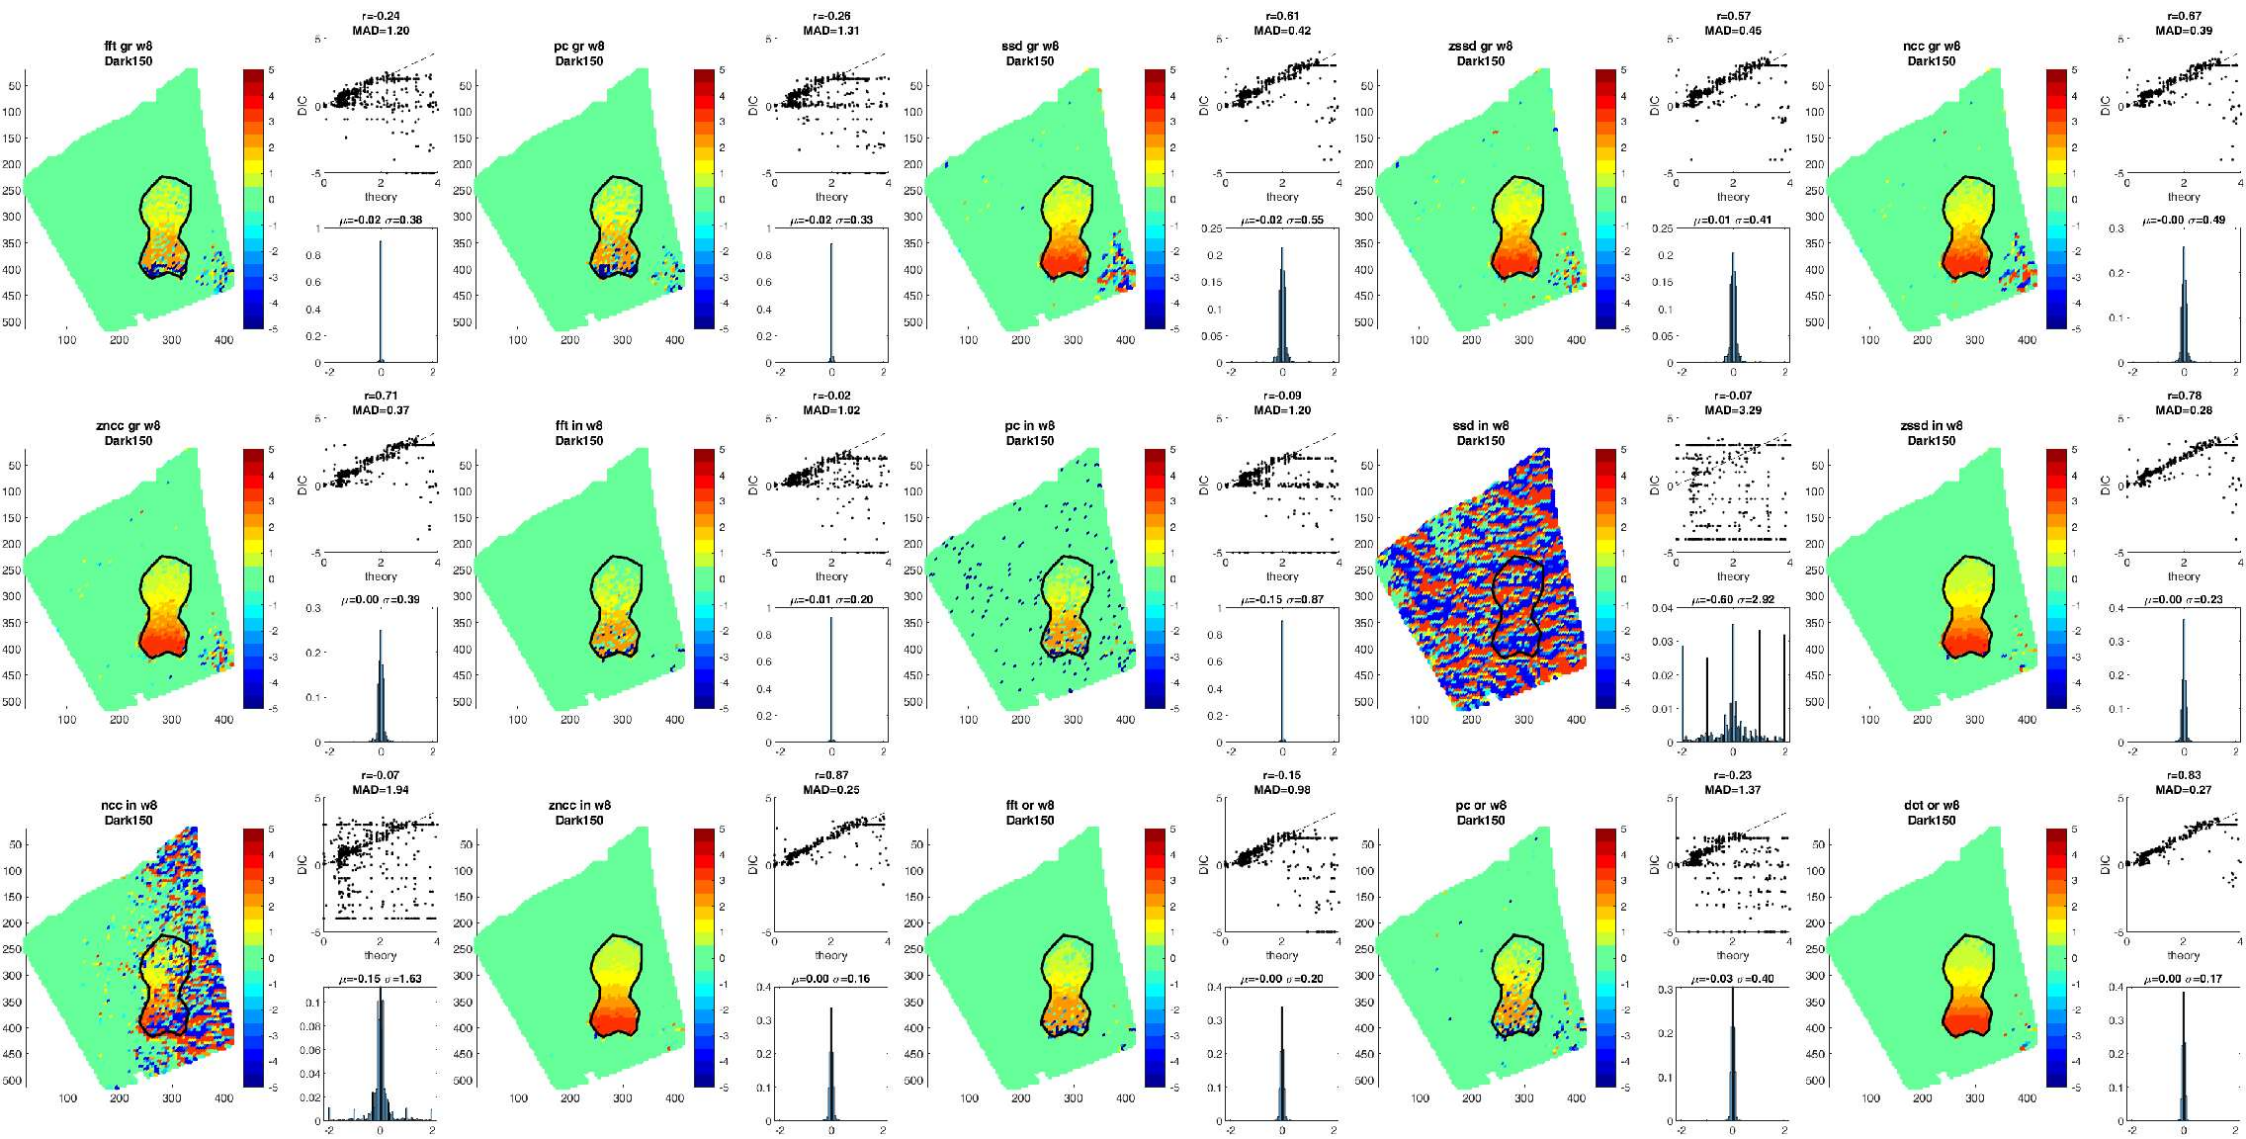

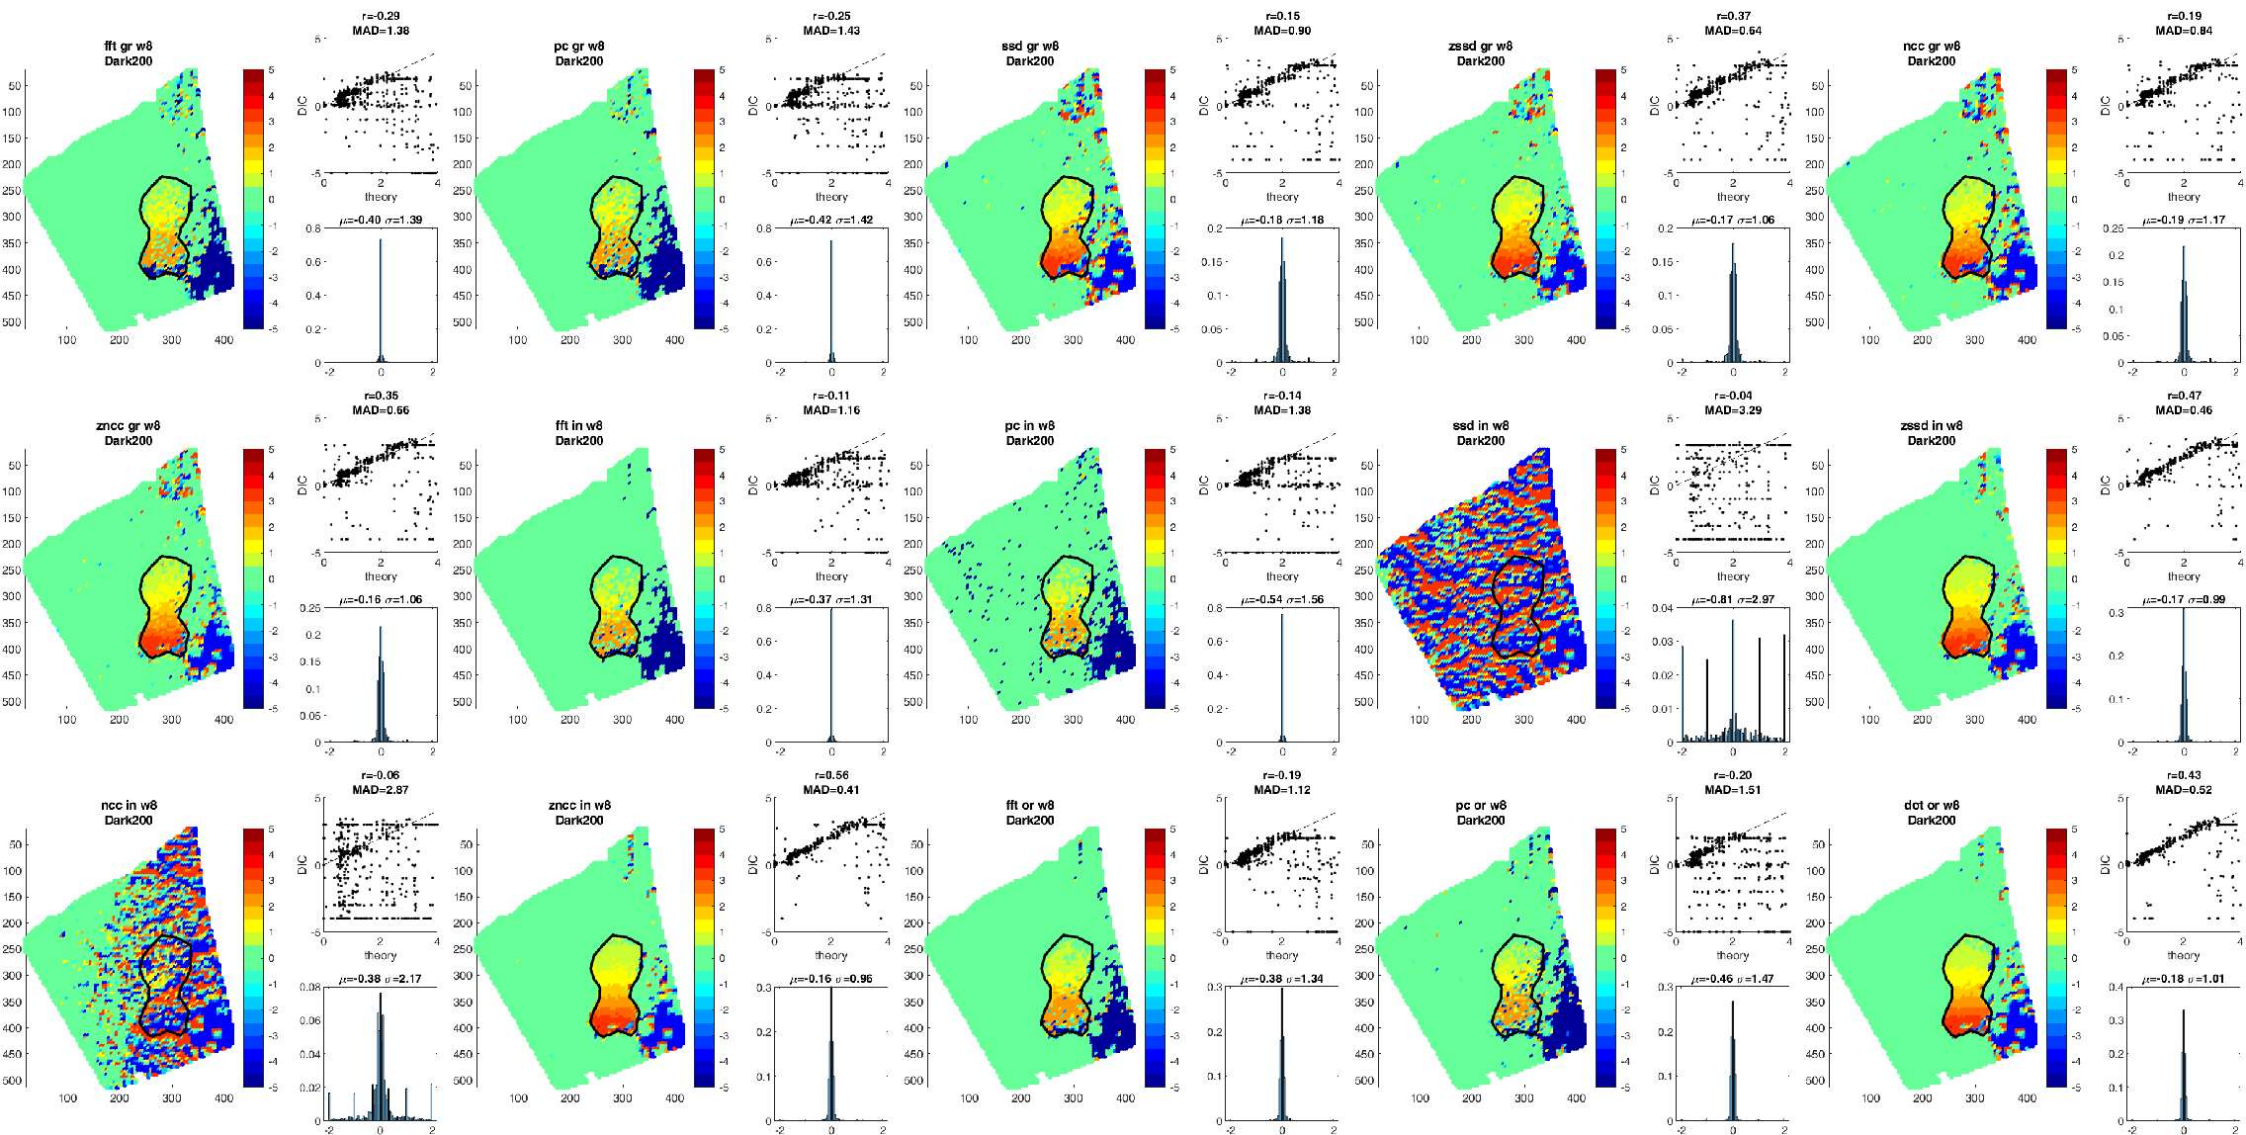



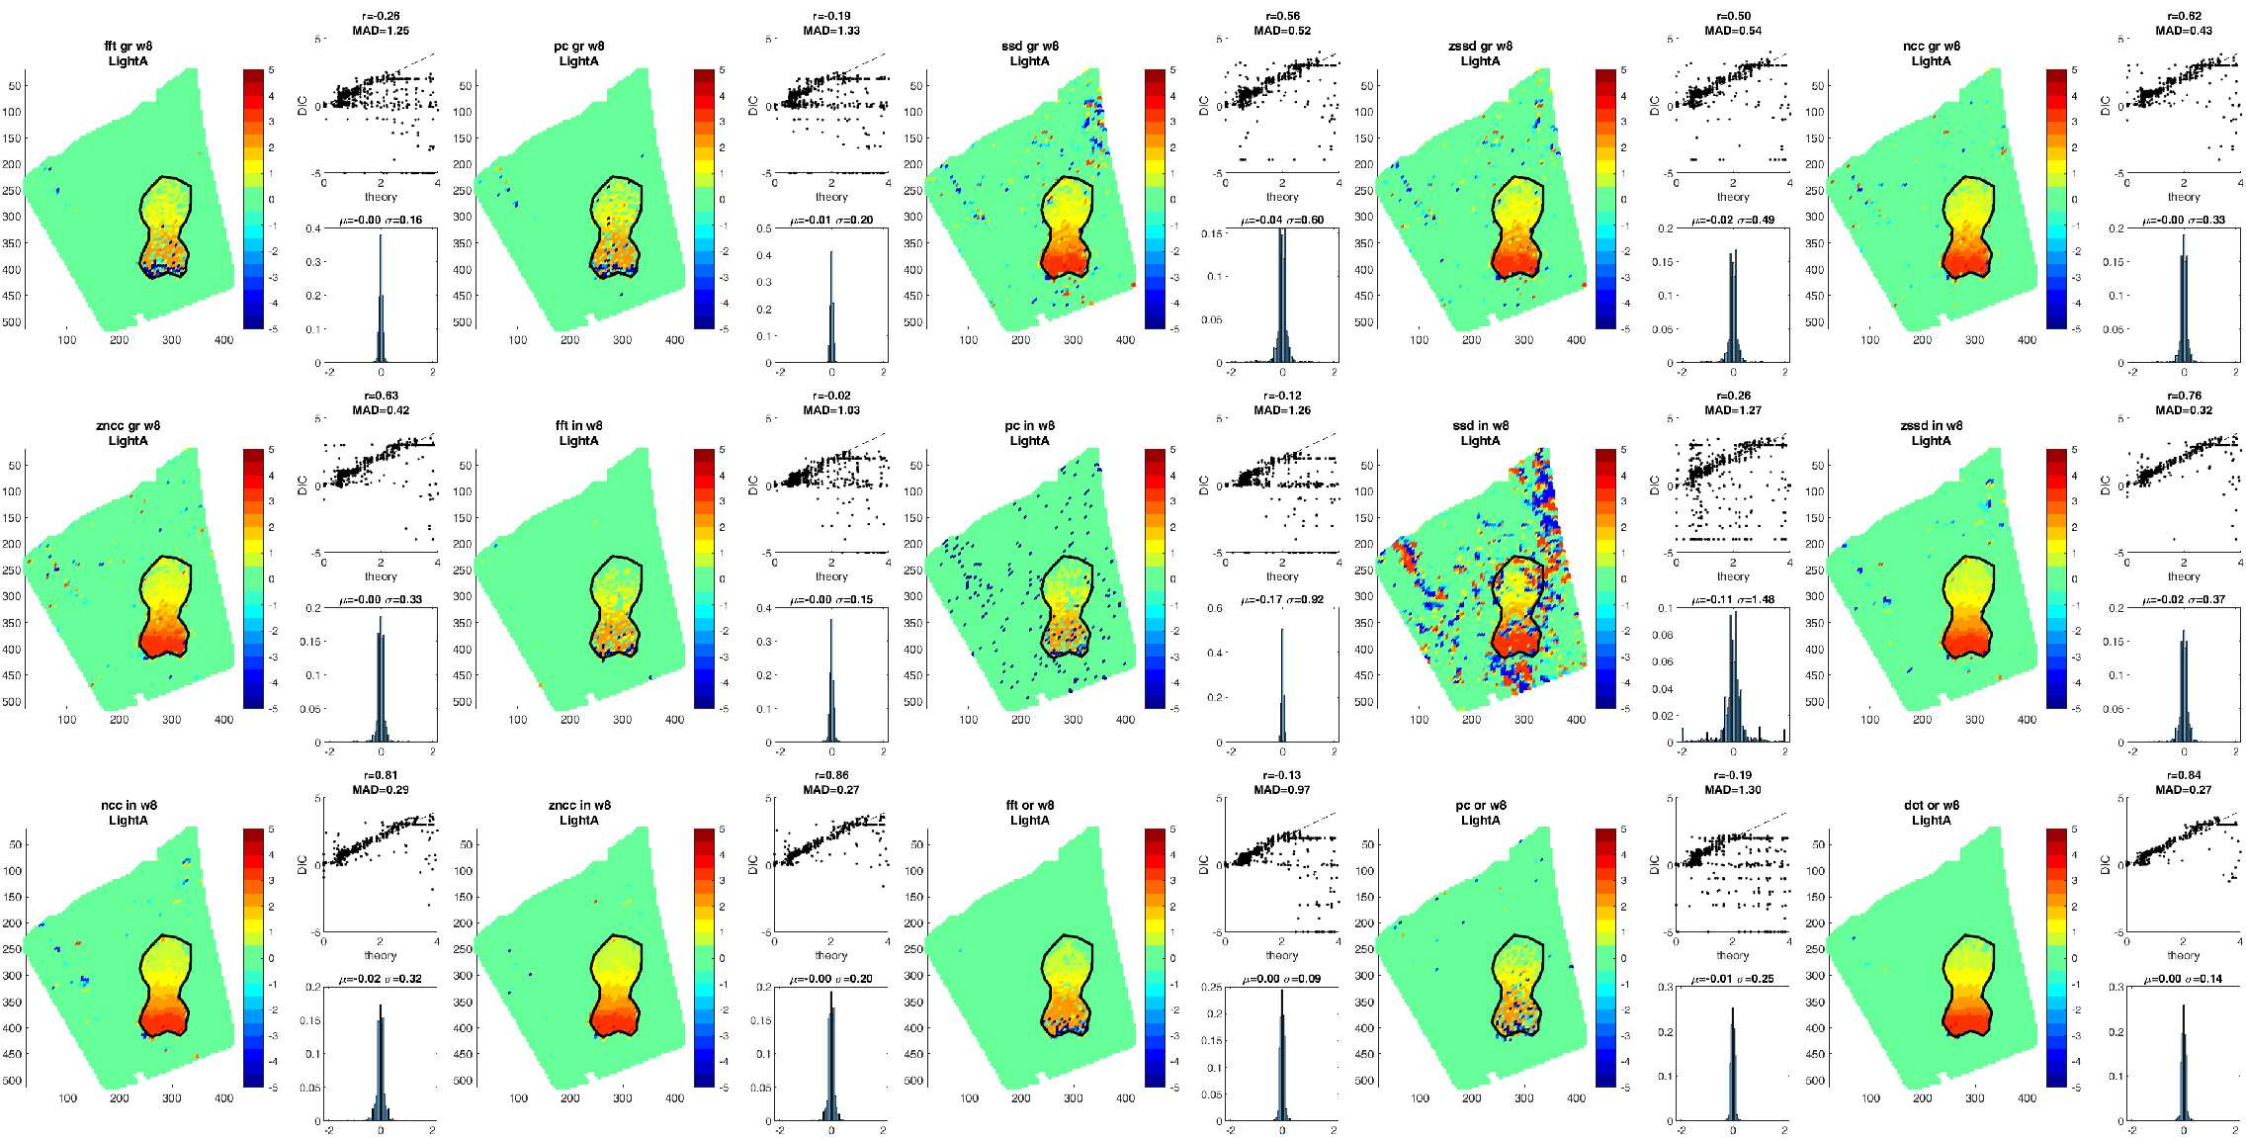



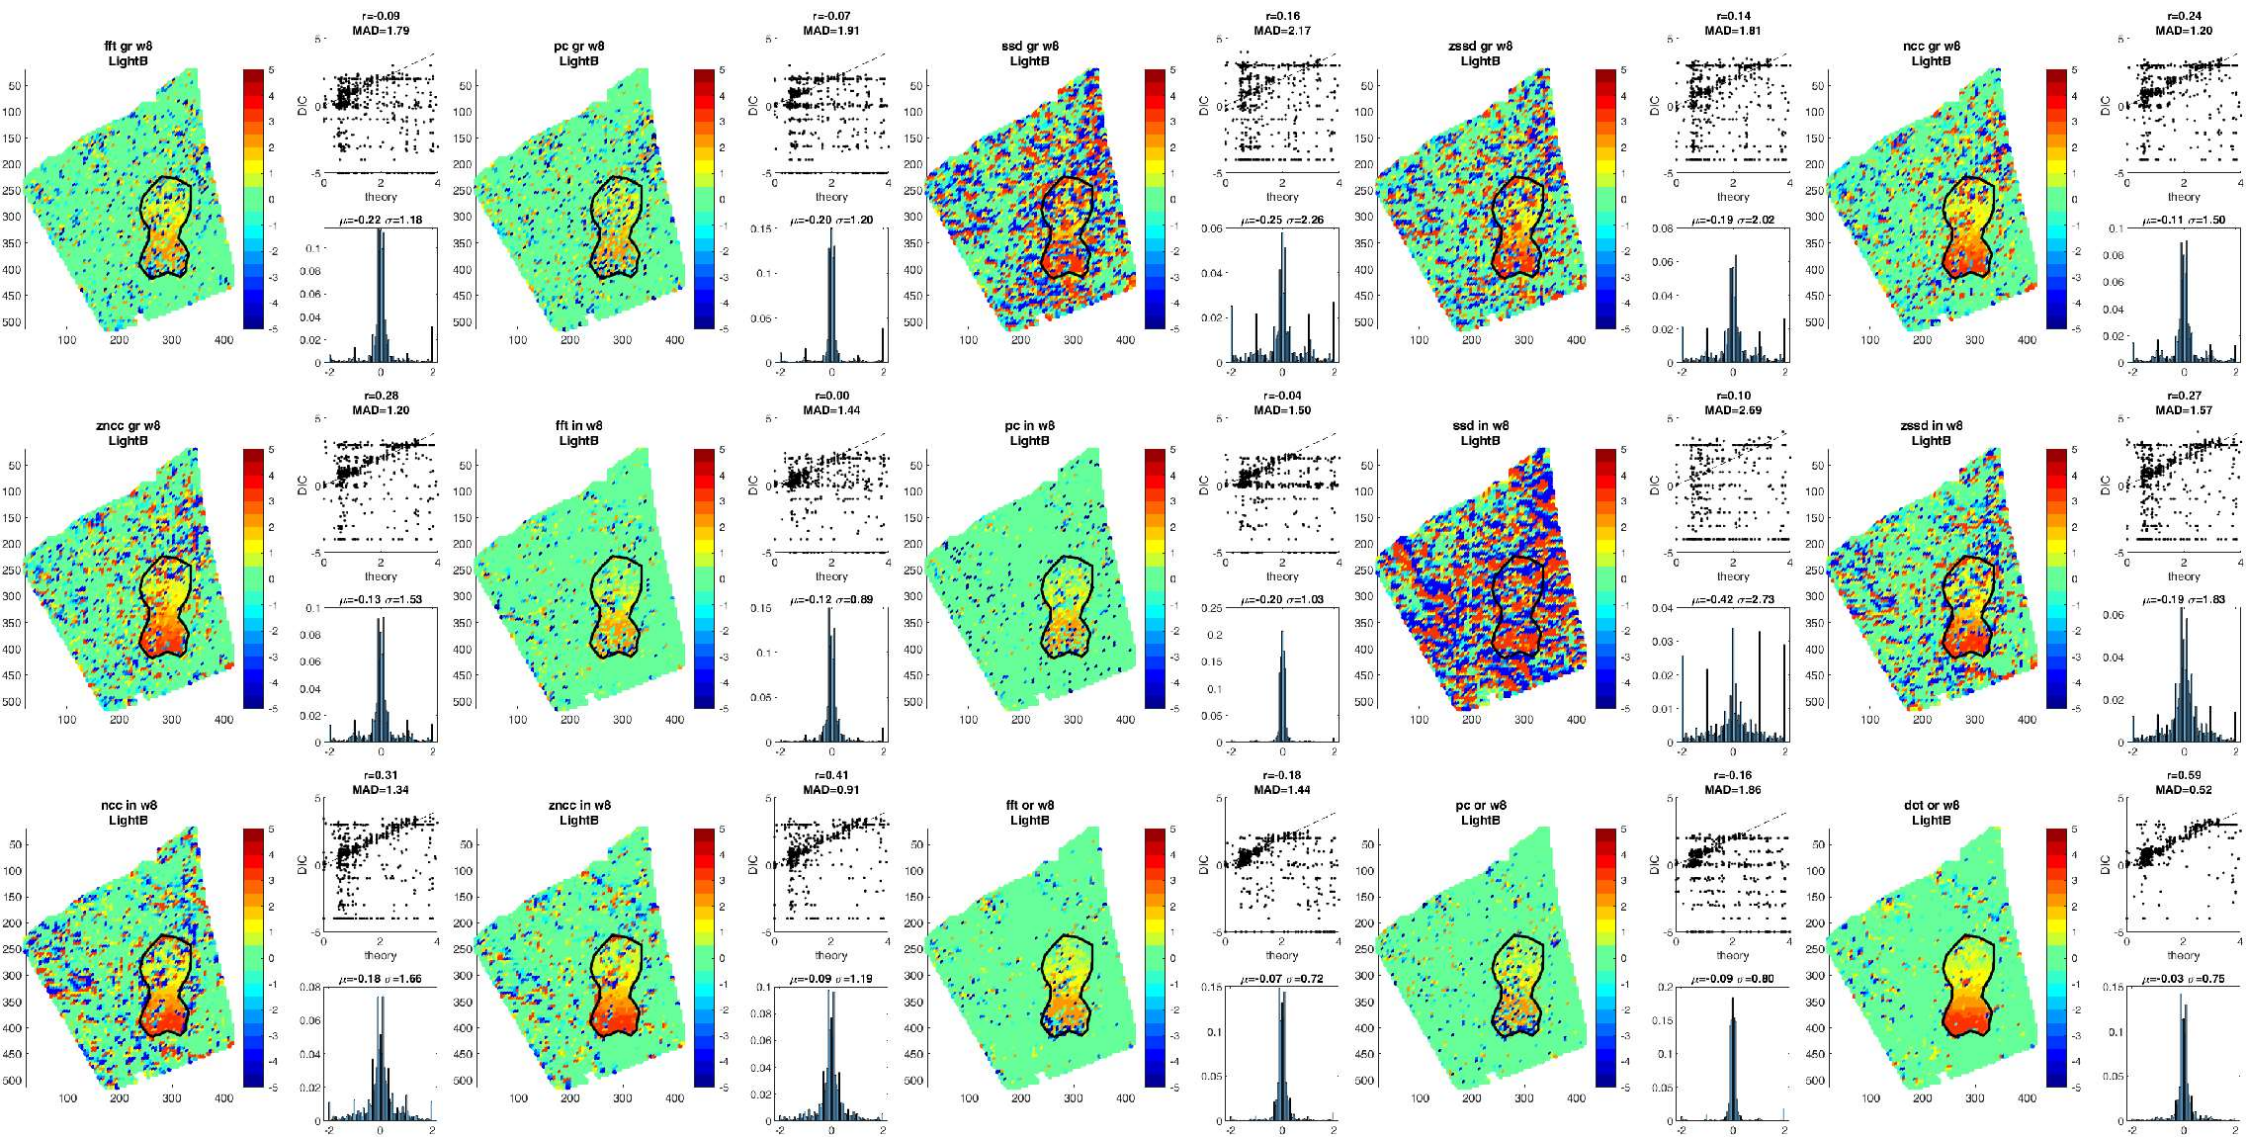



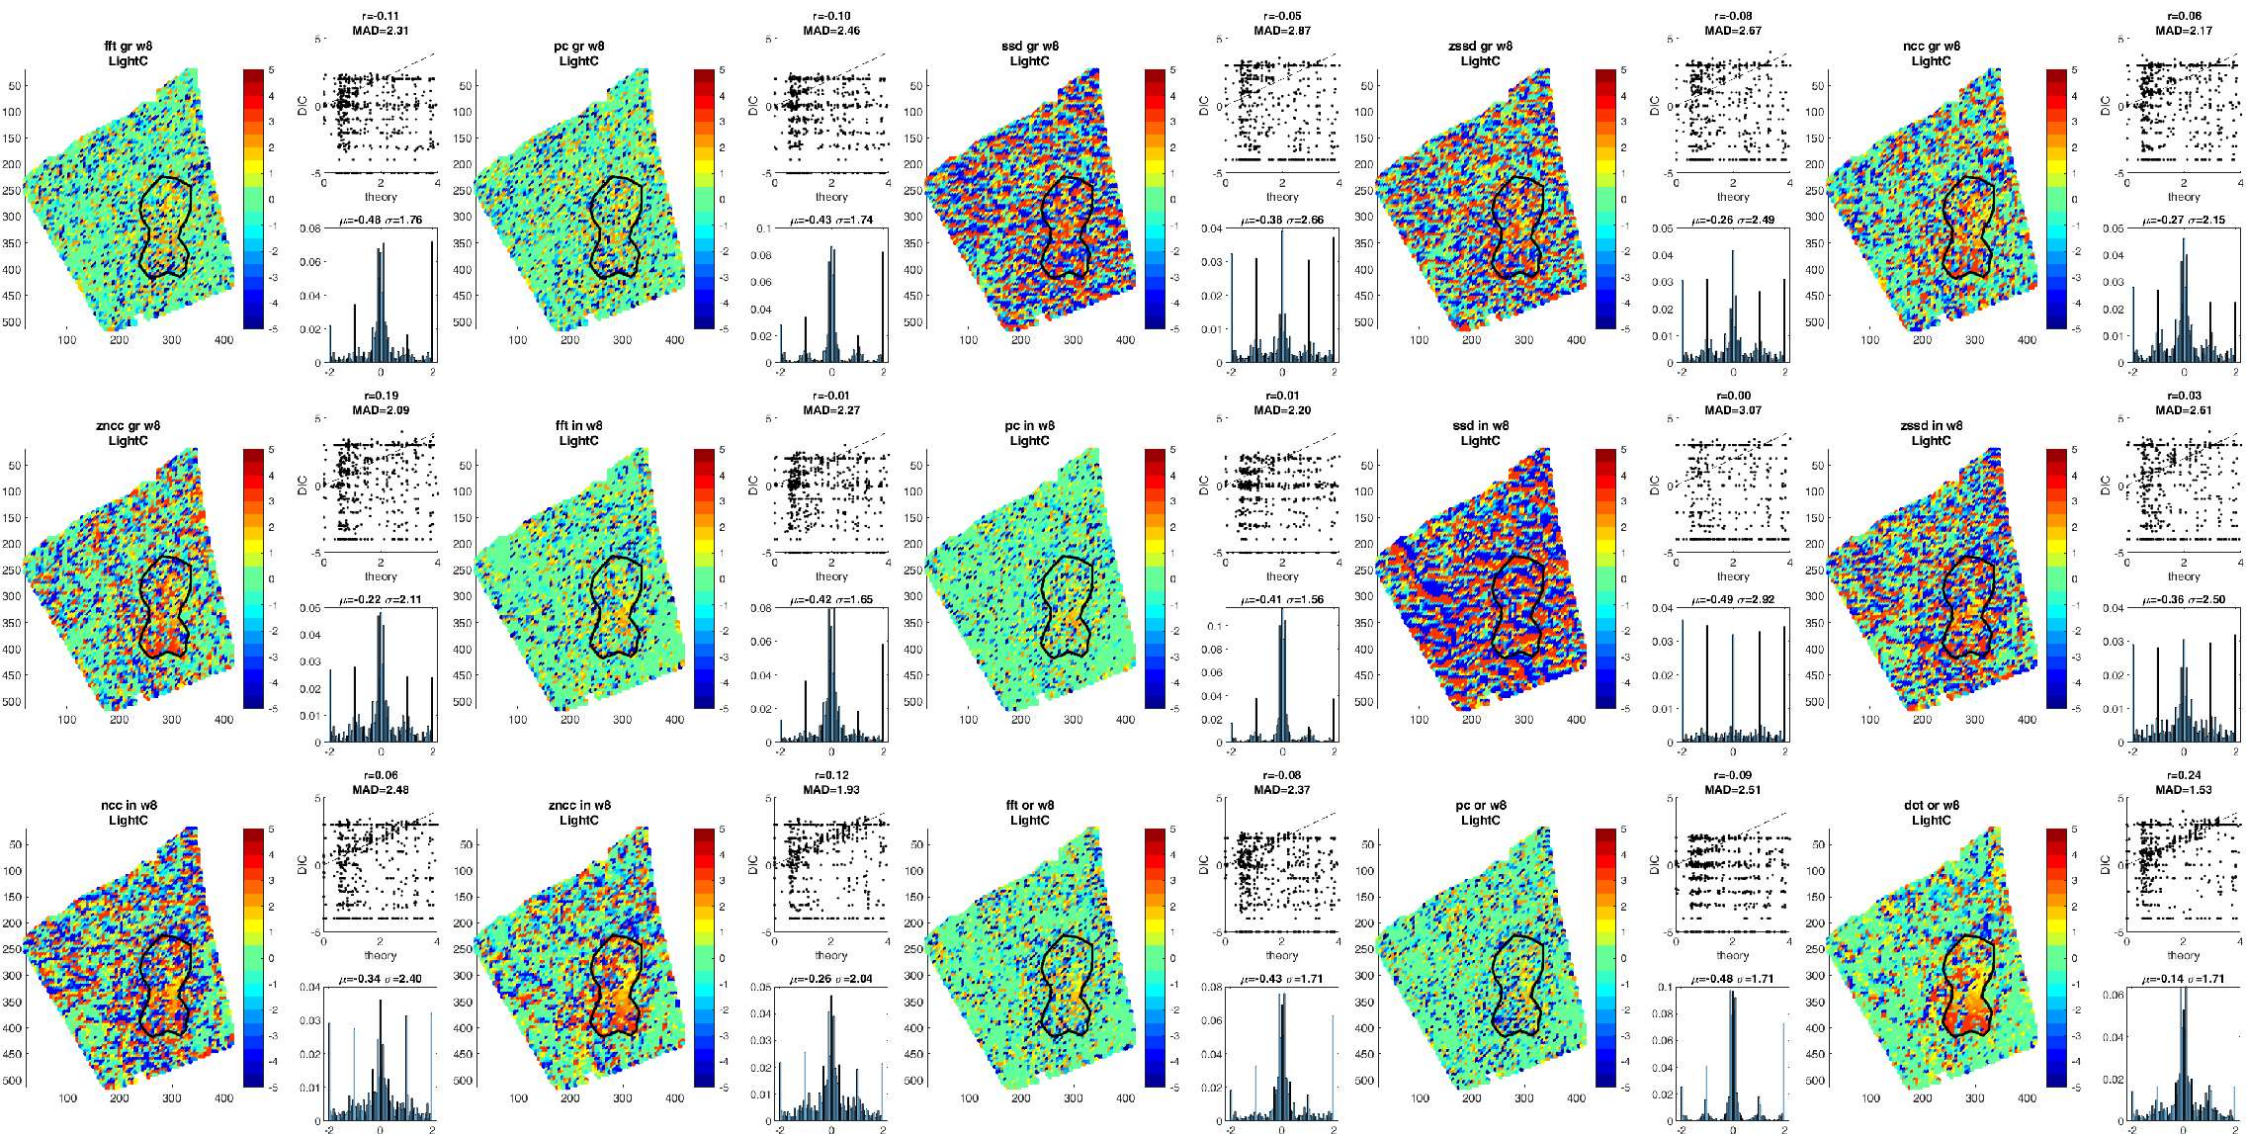



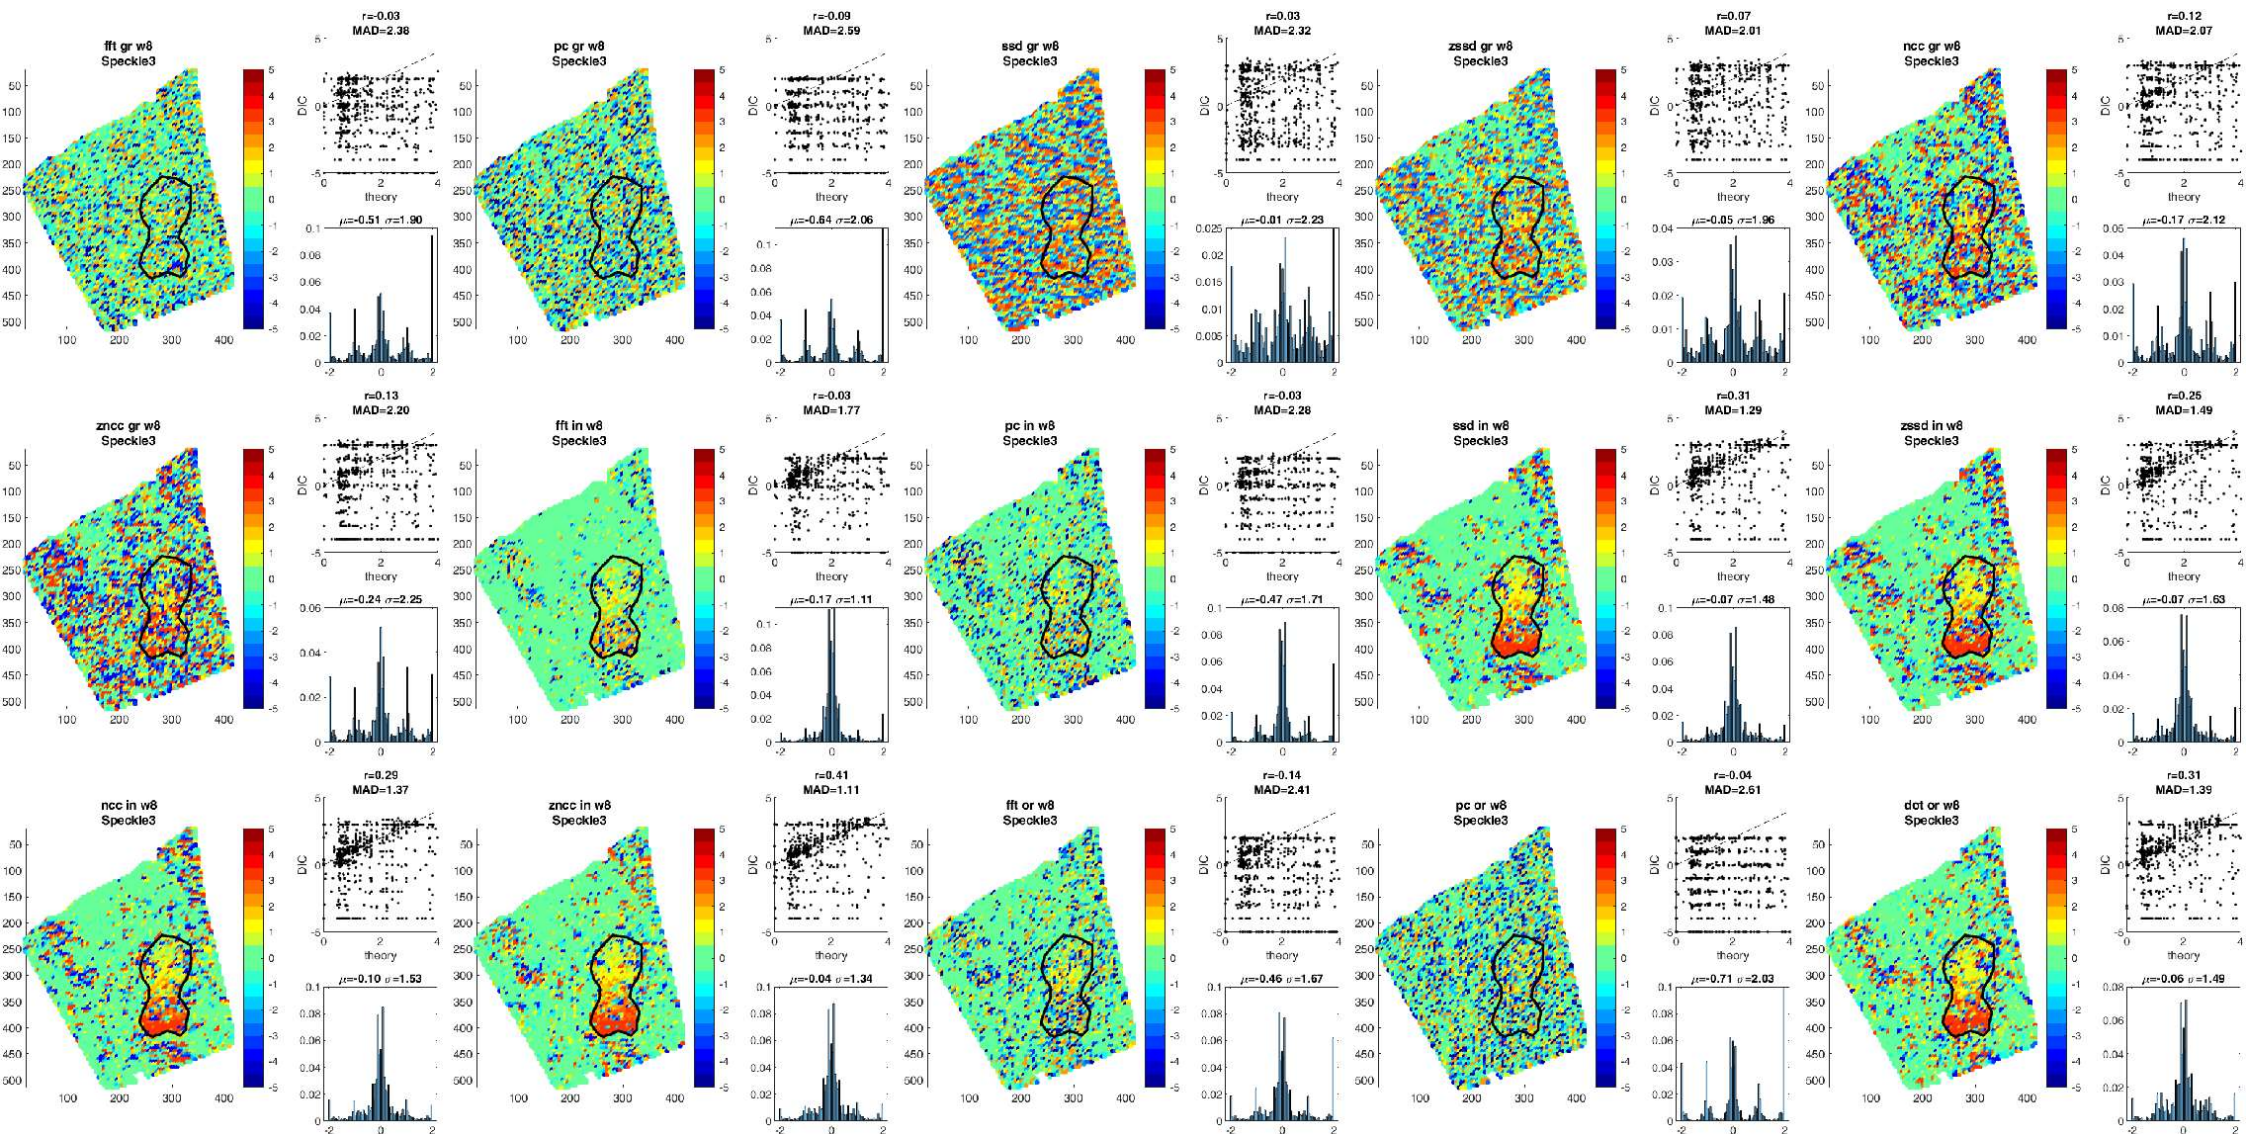



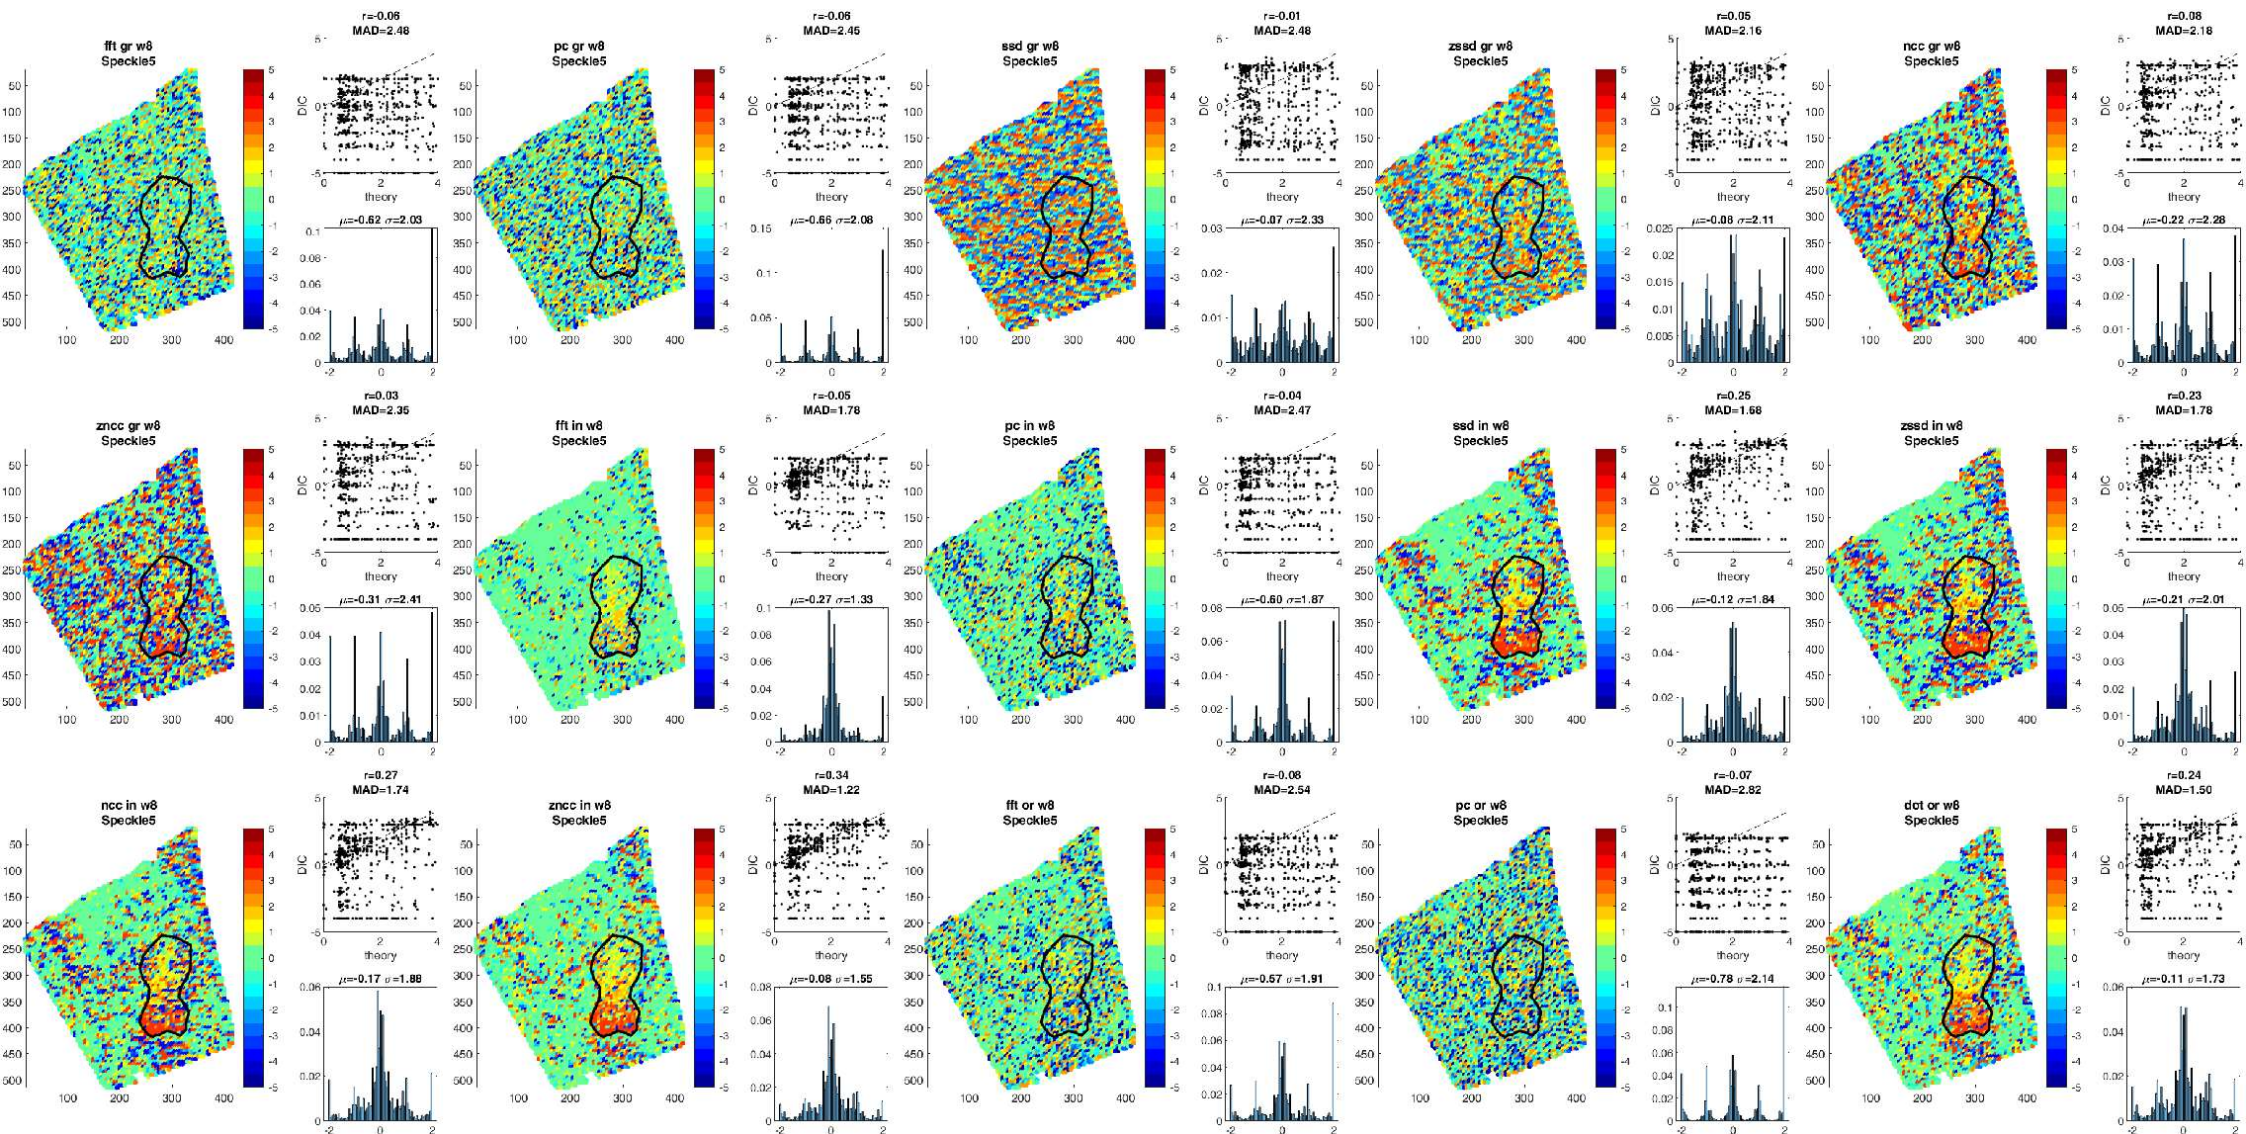



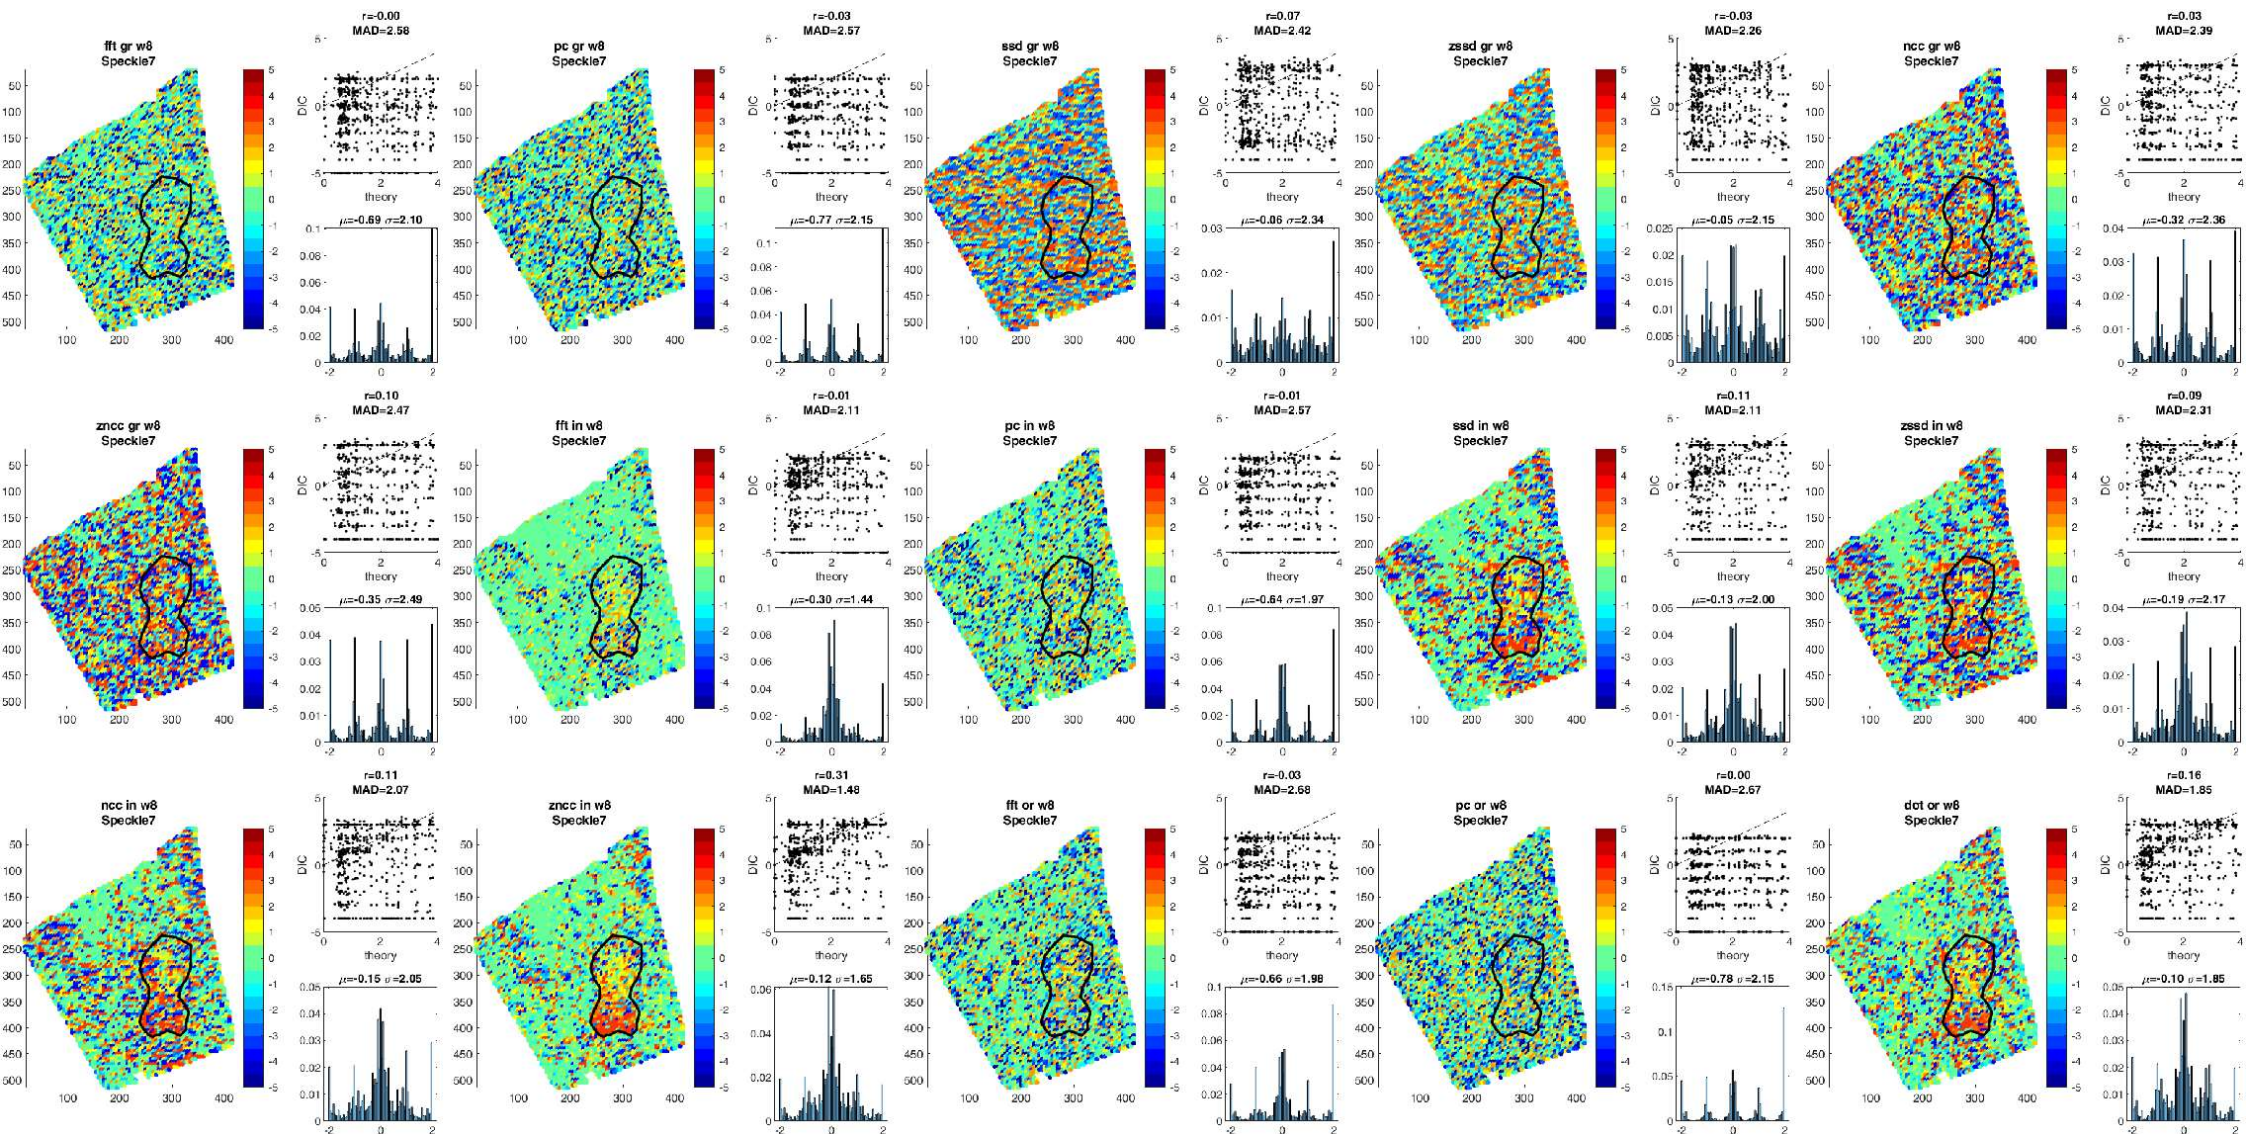



Template size 16x16

# motlm

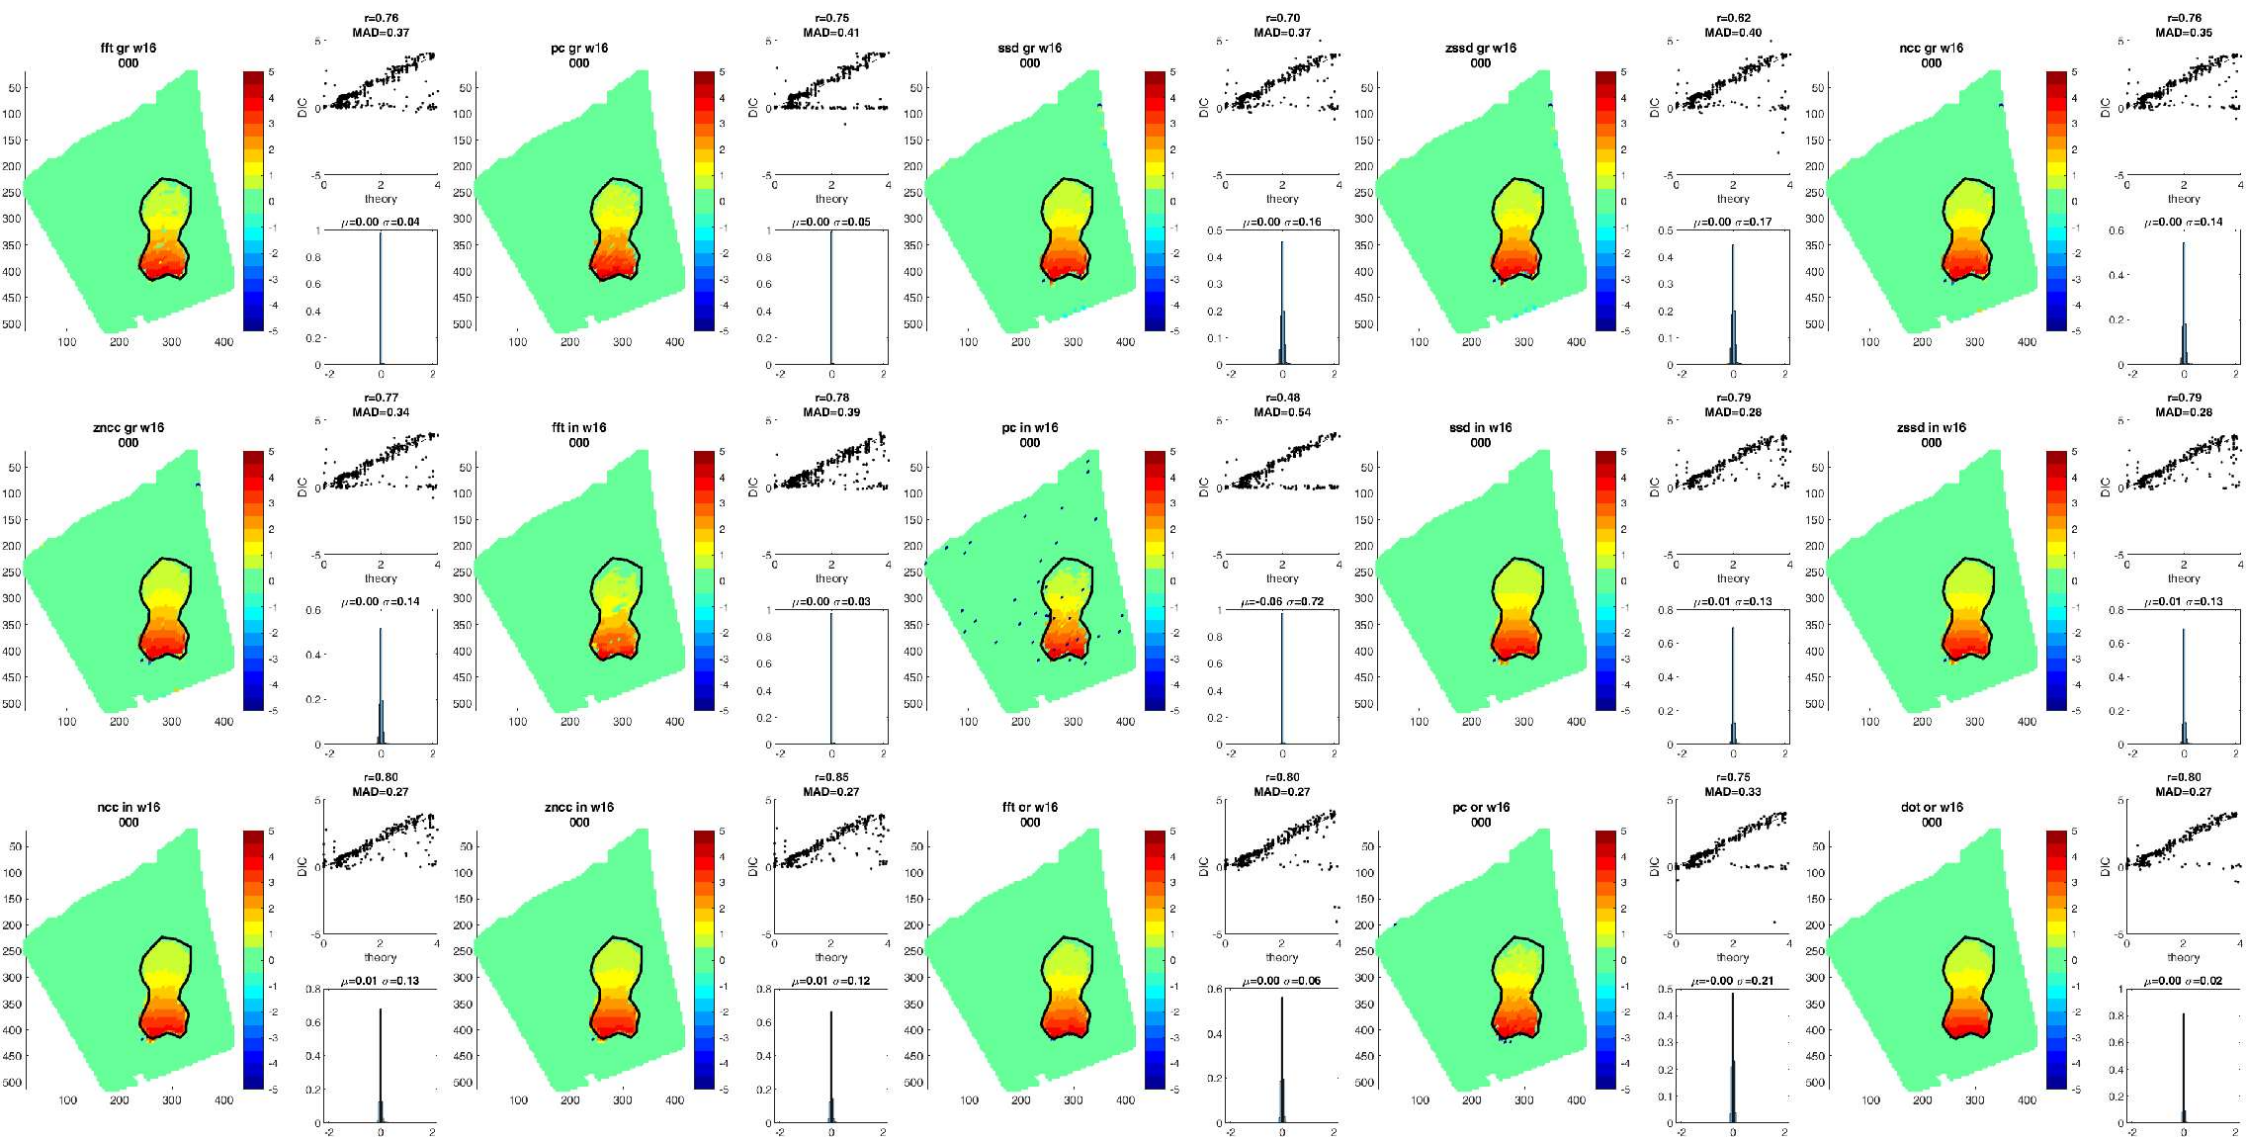



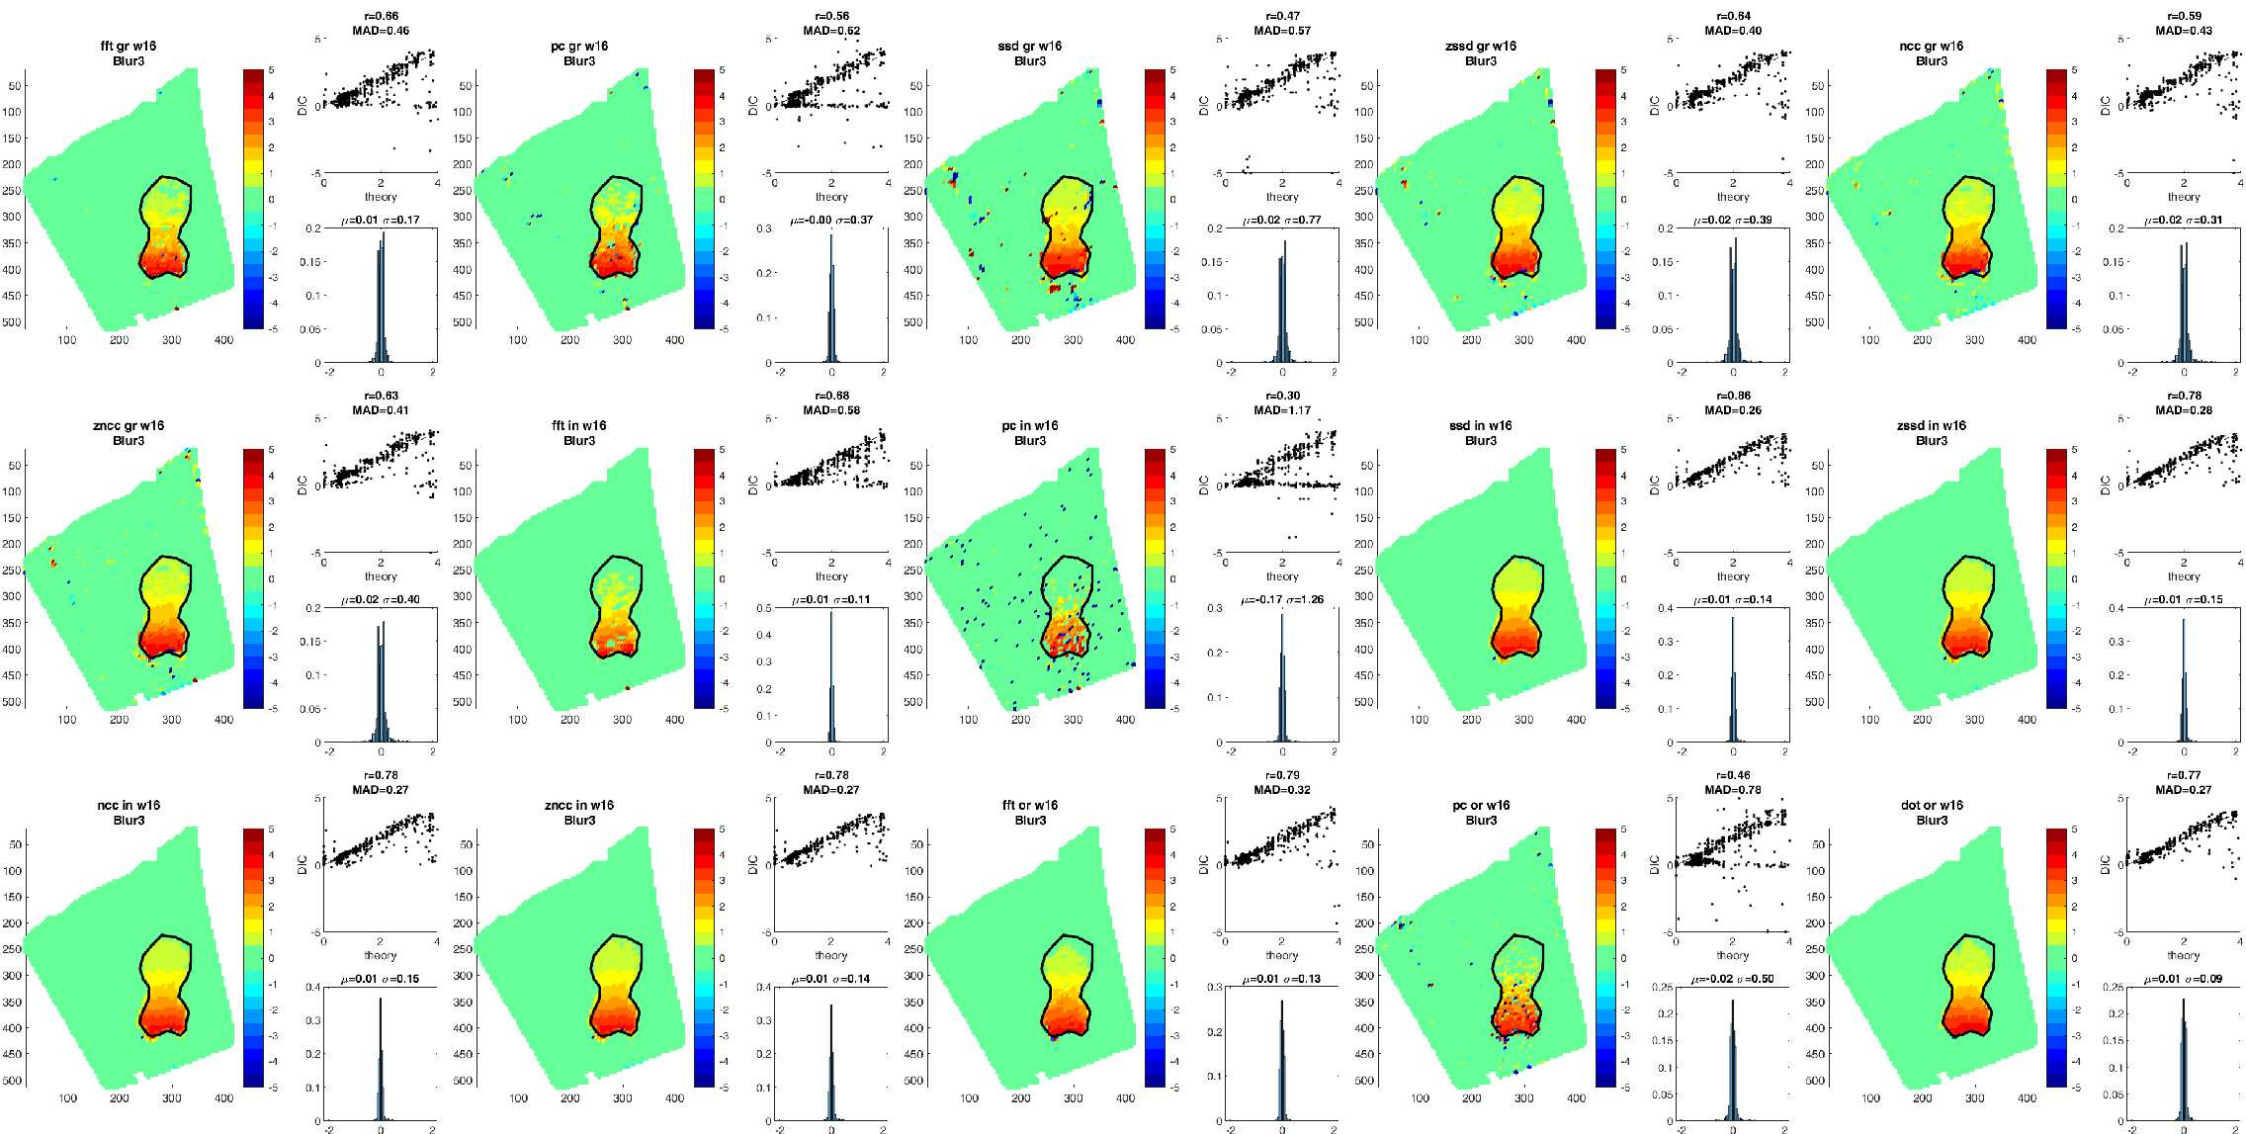

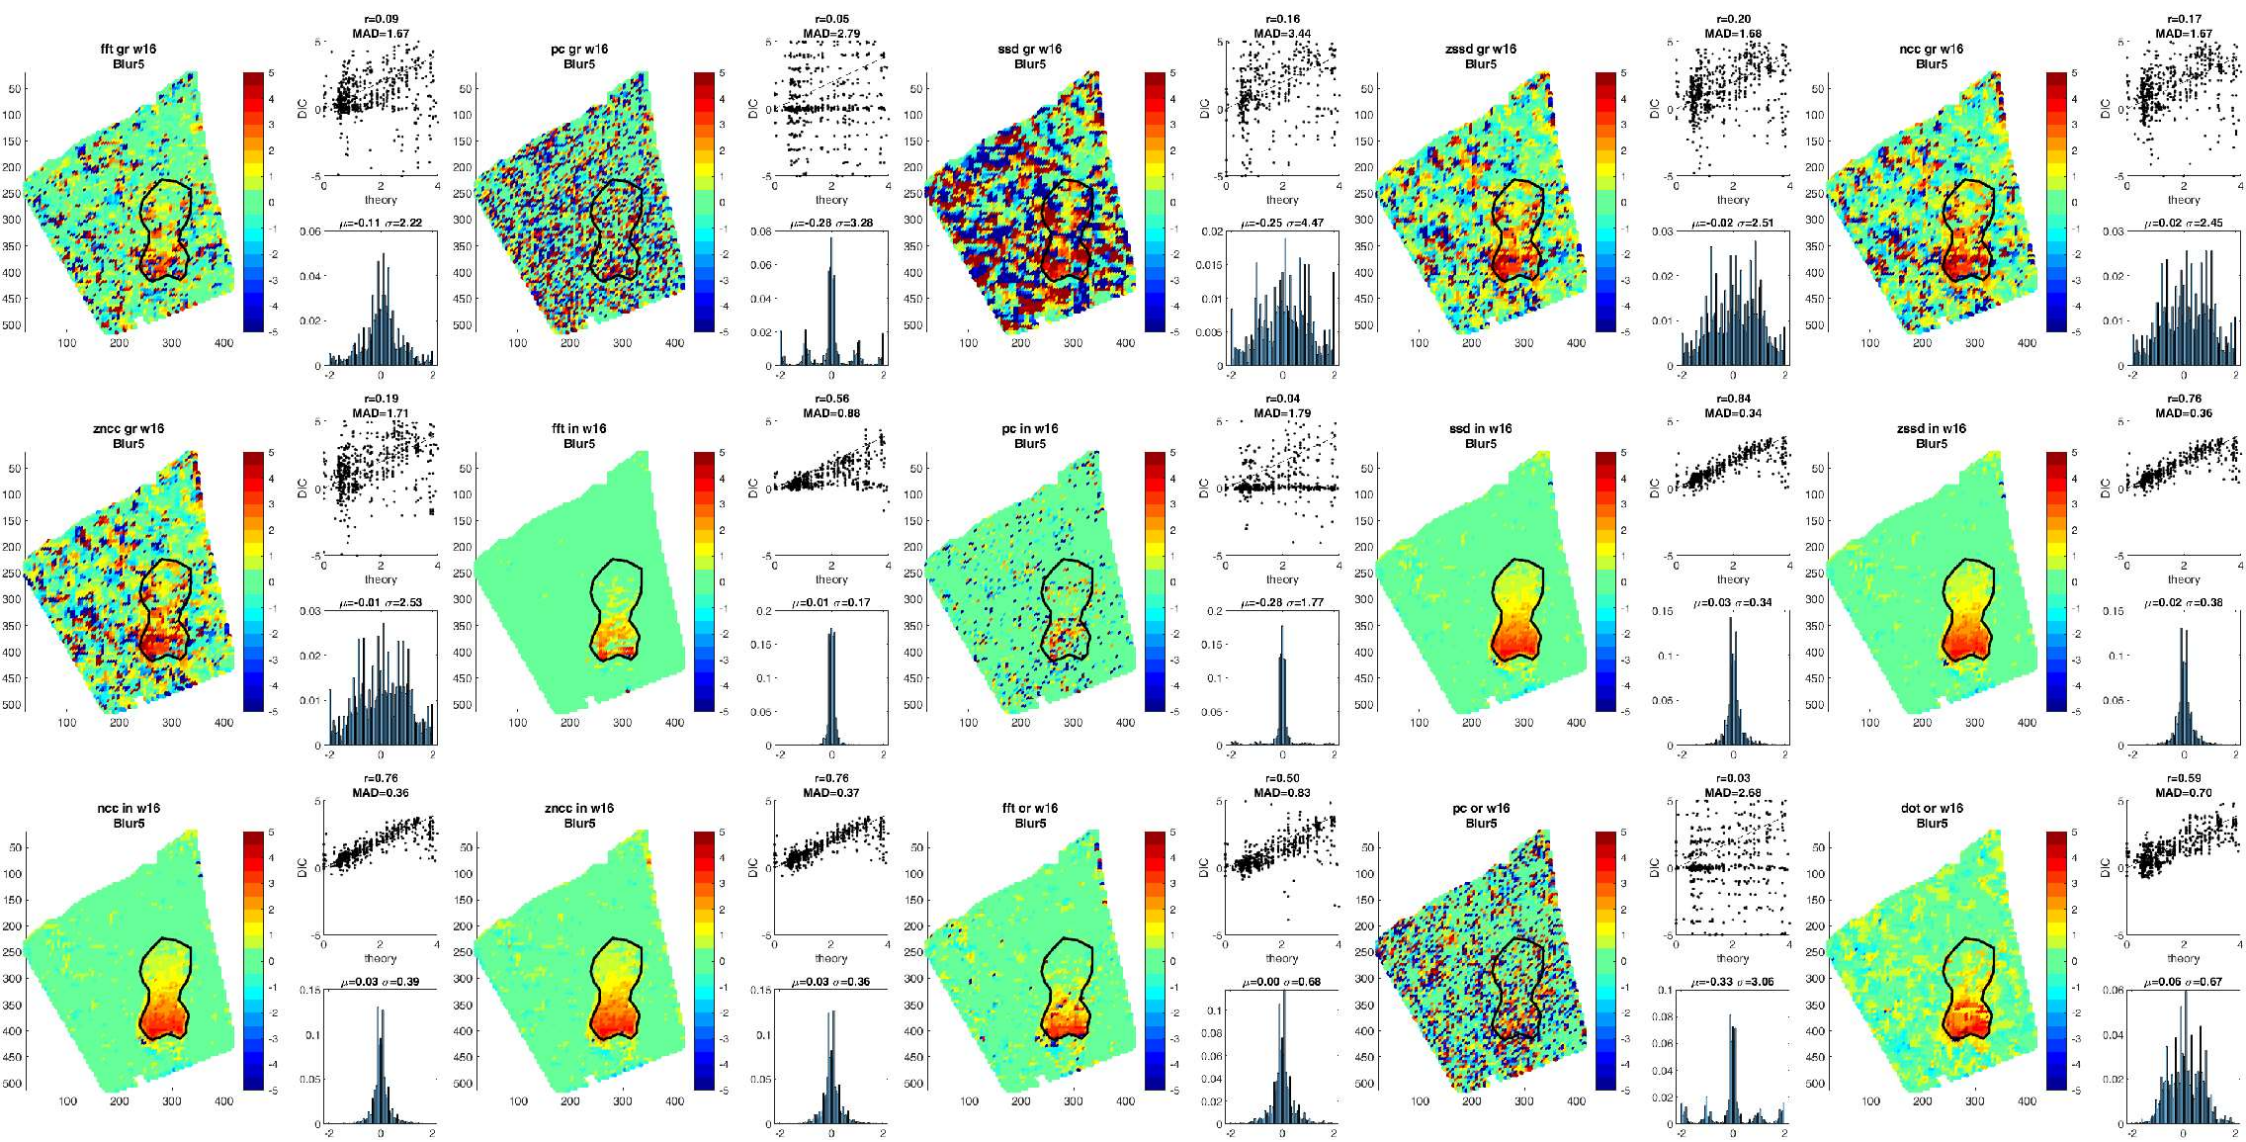



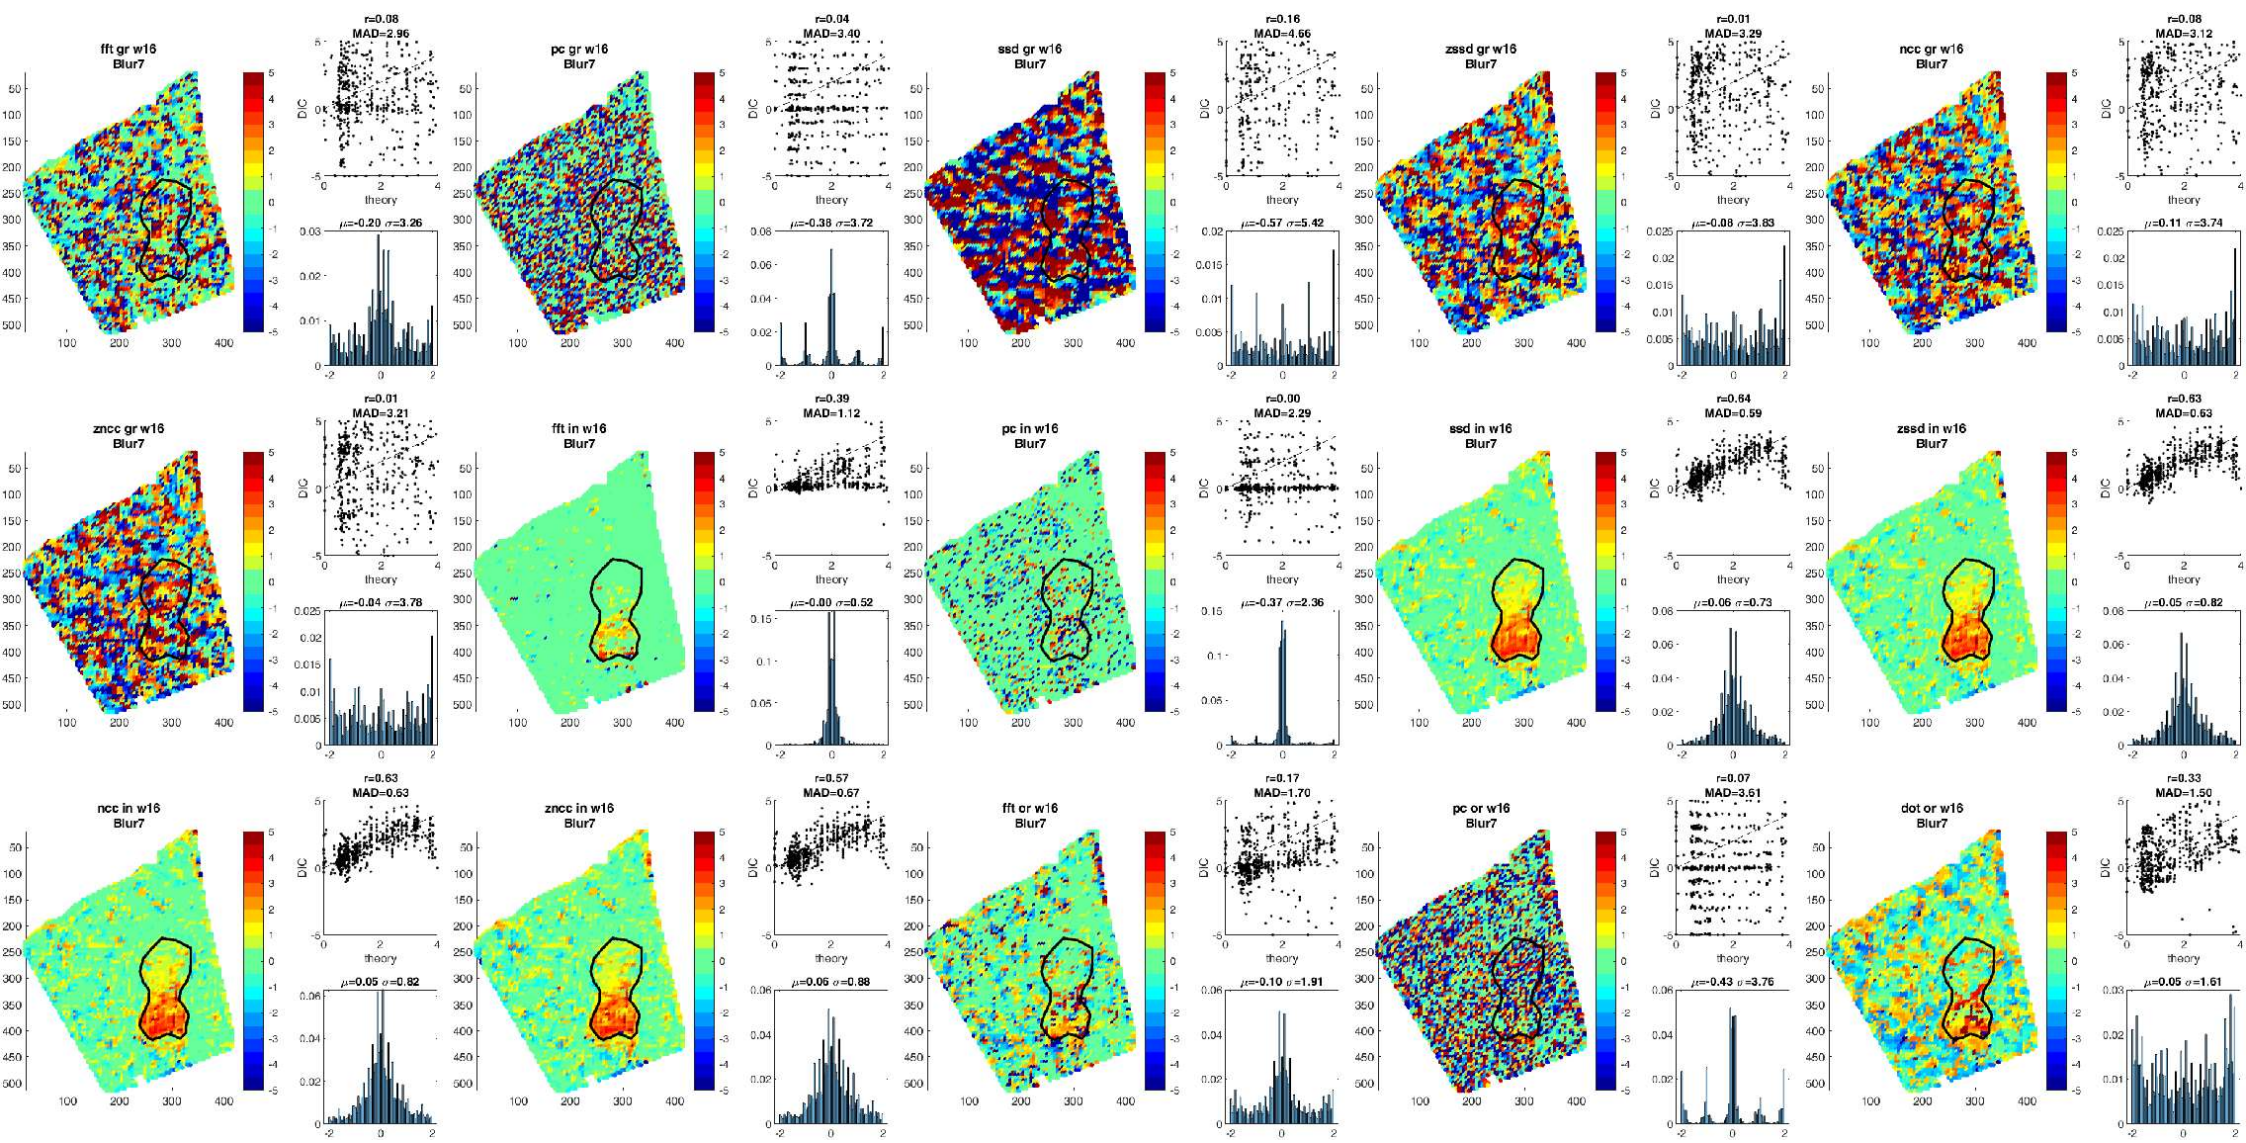



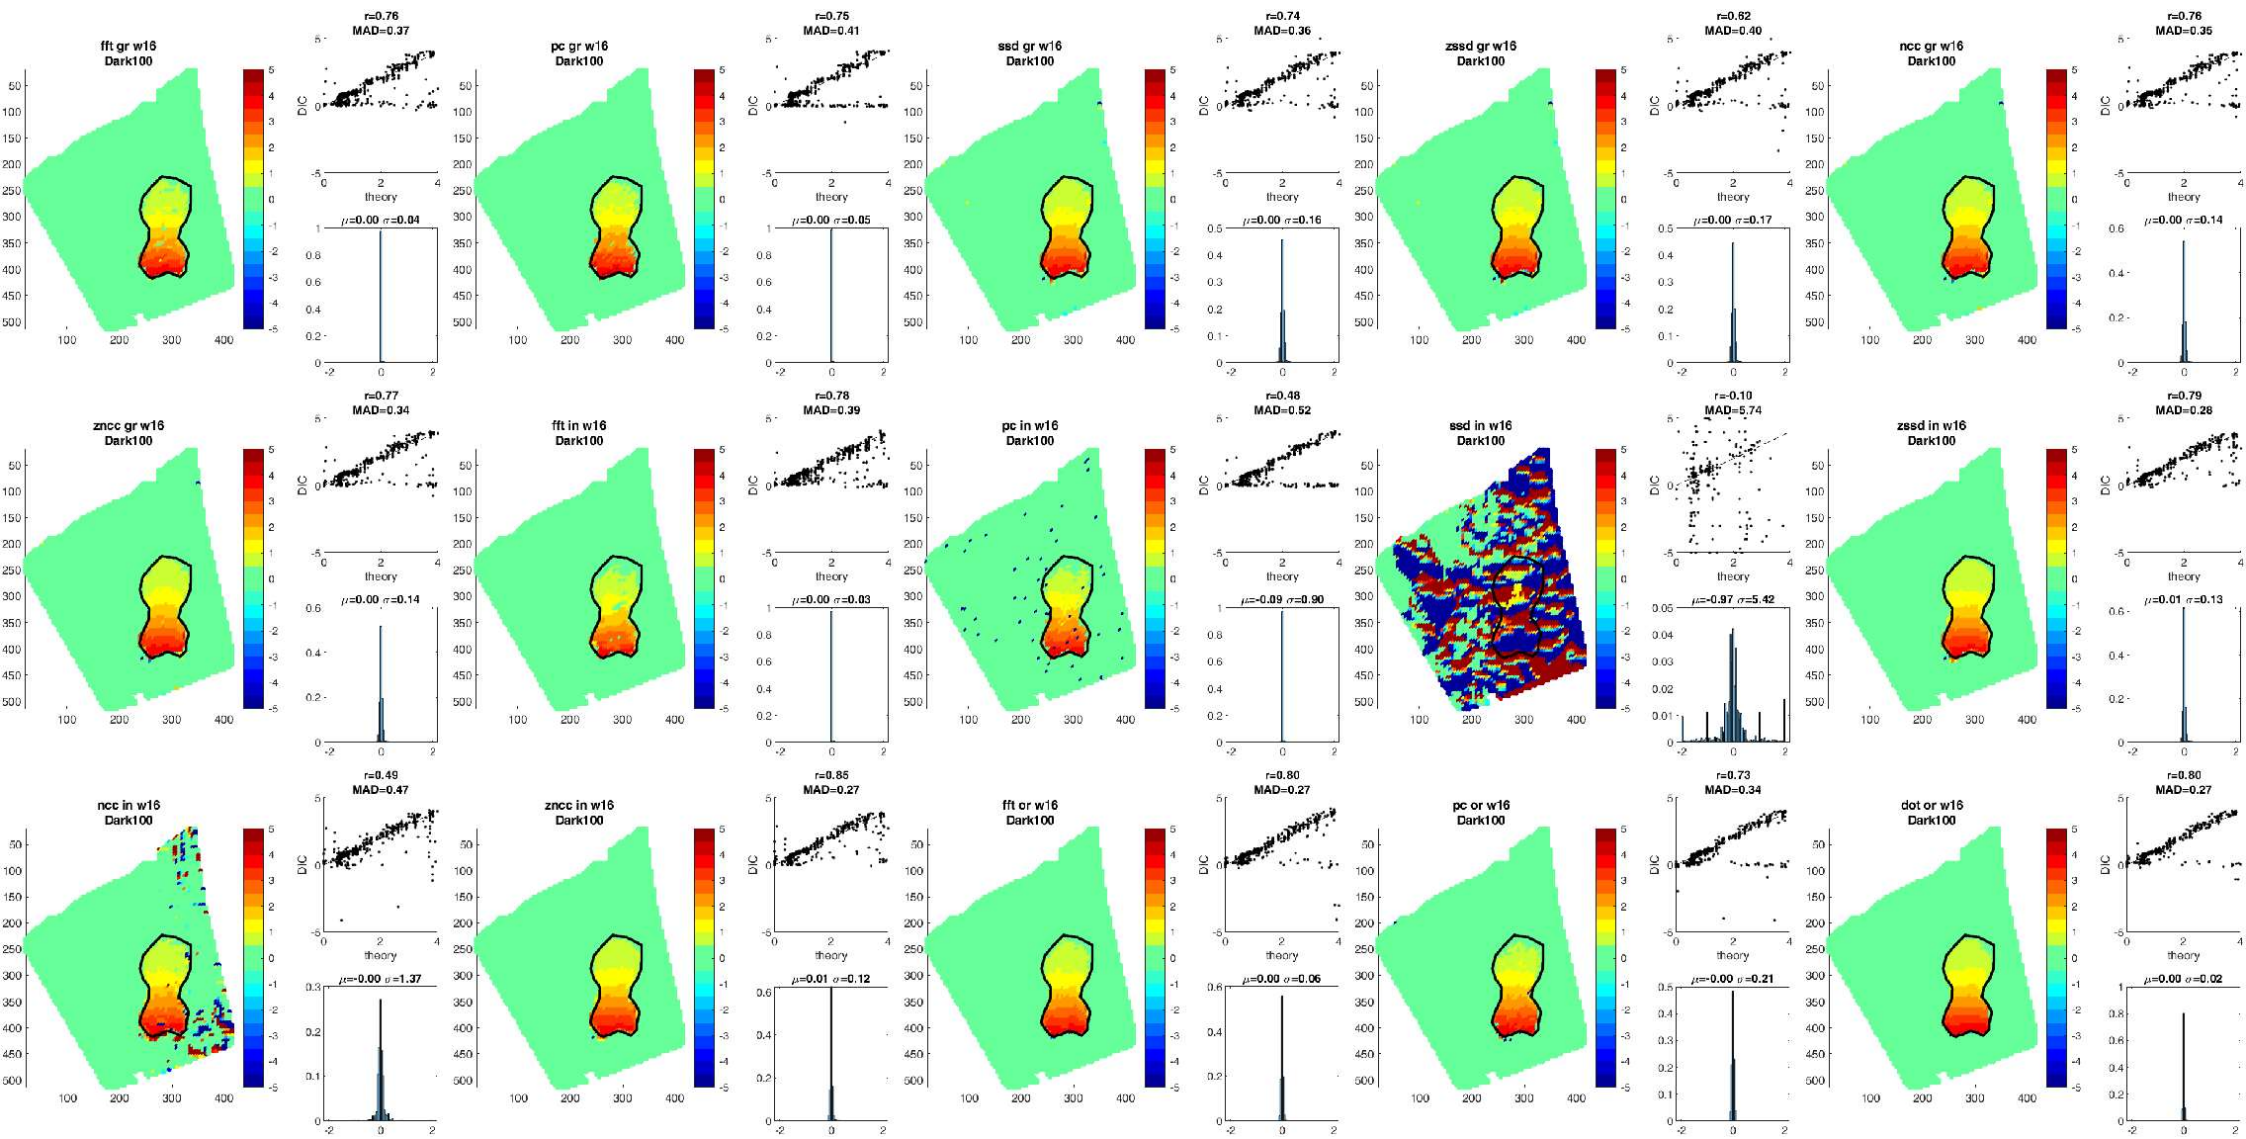



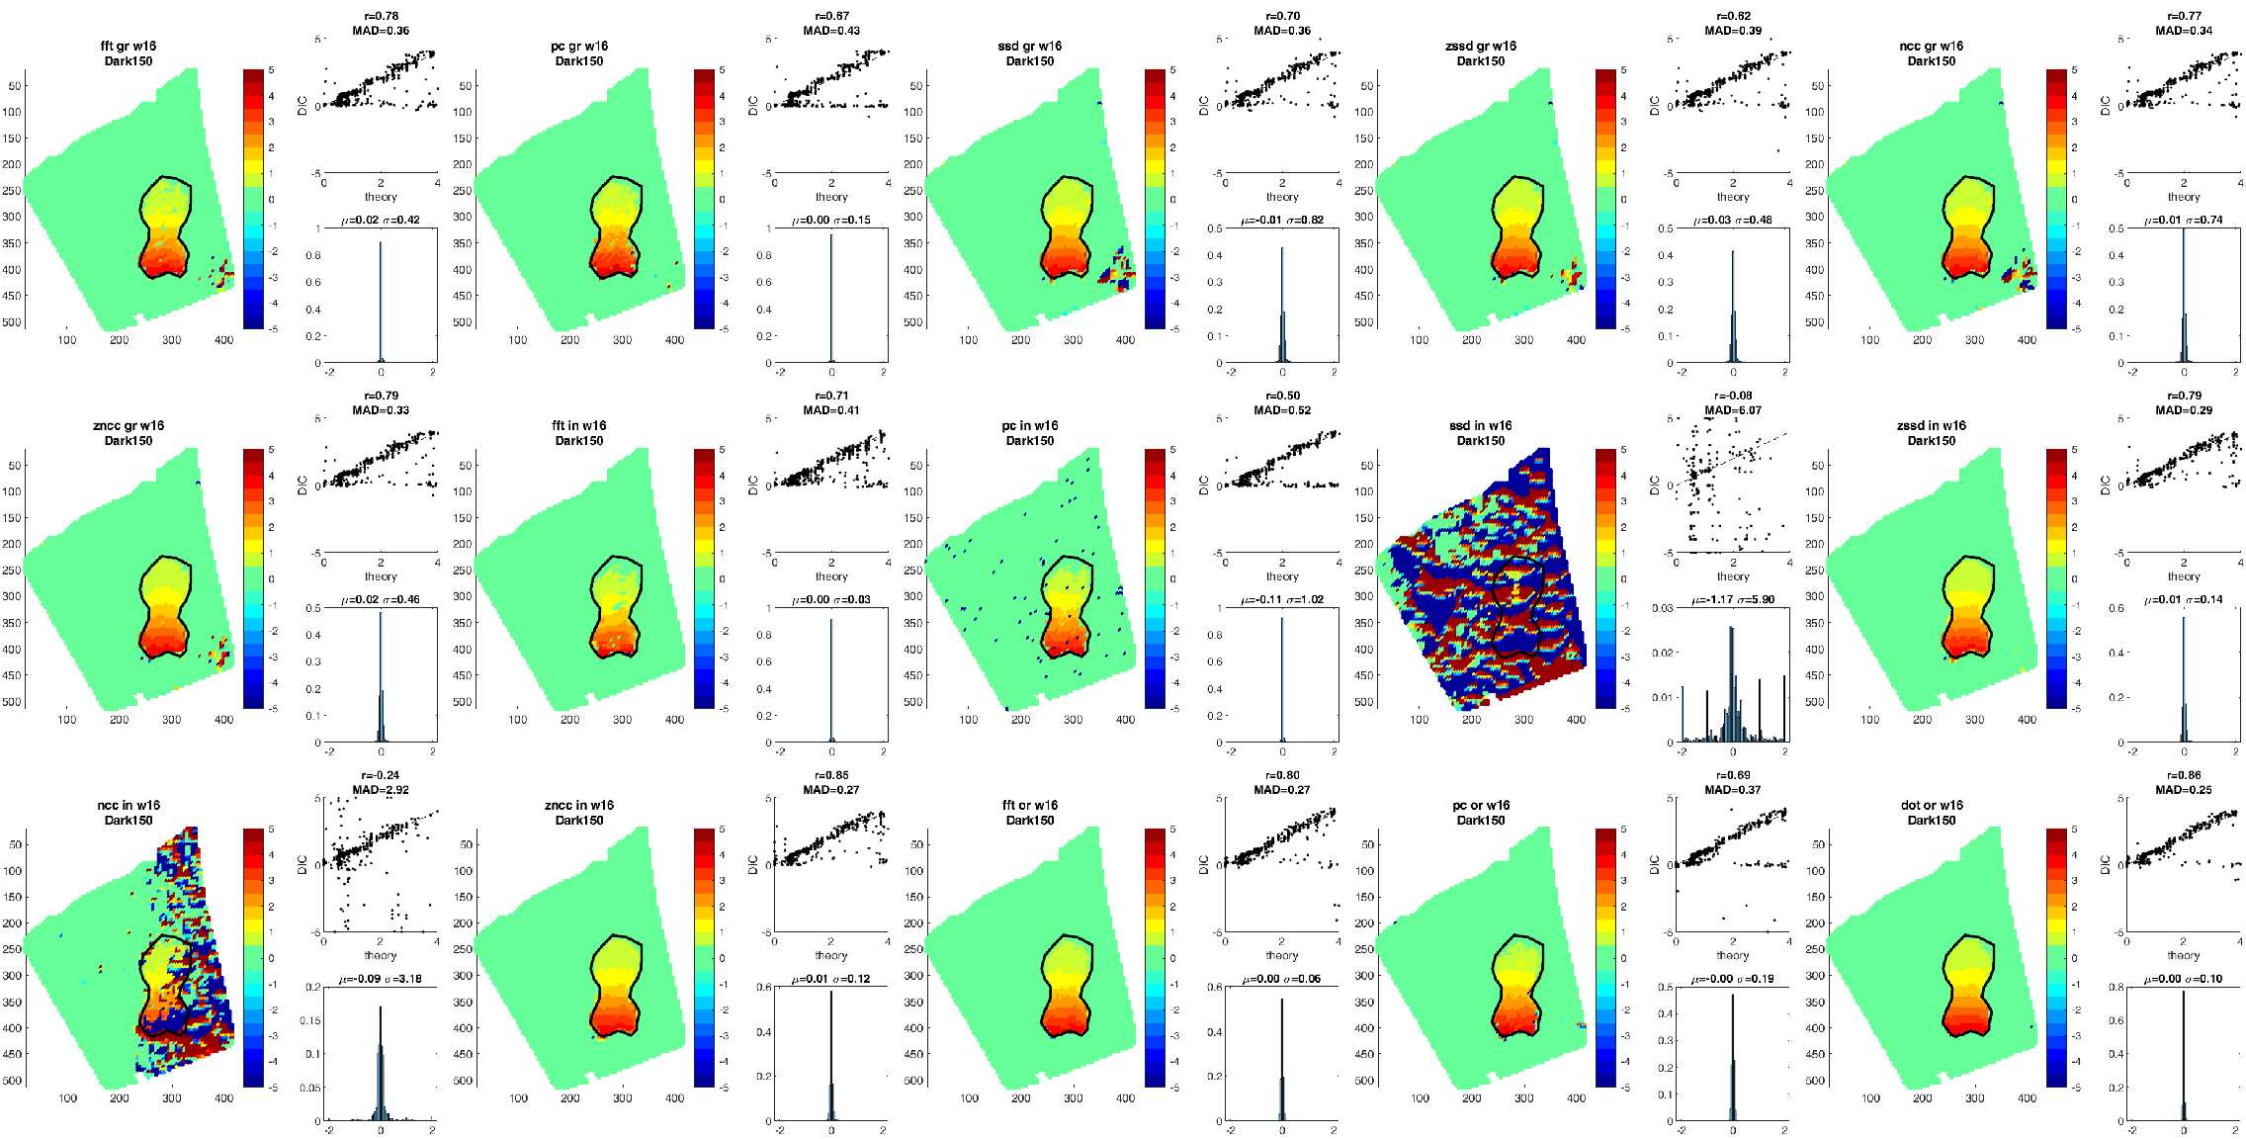

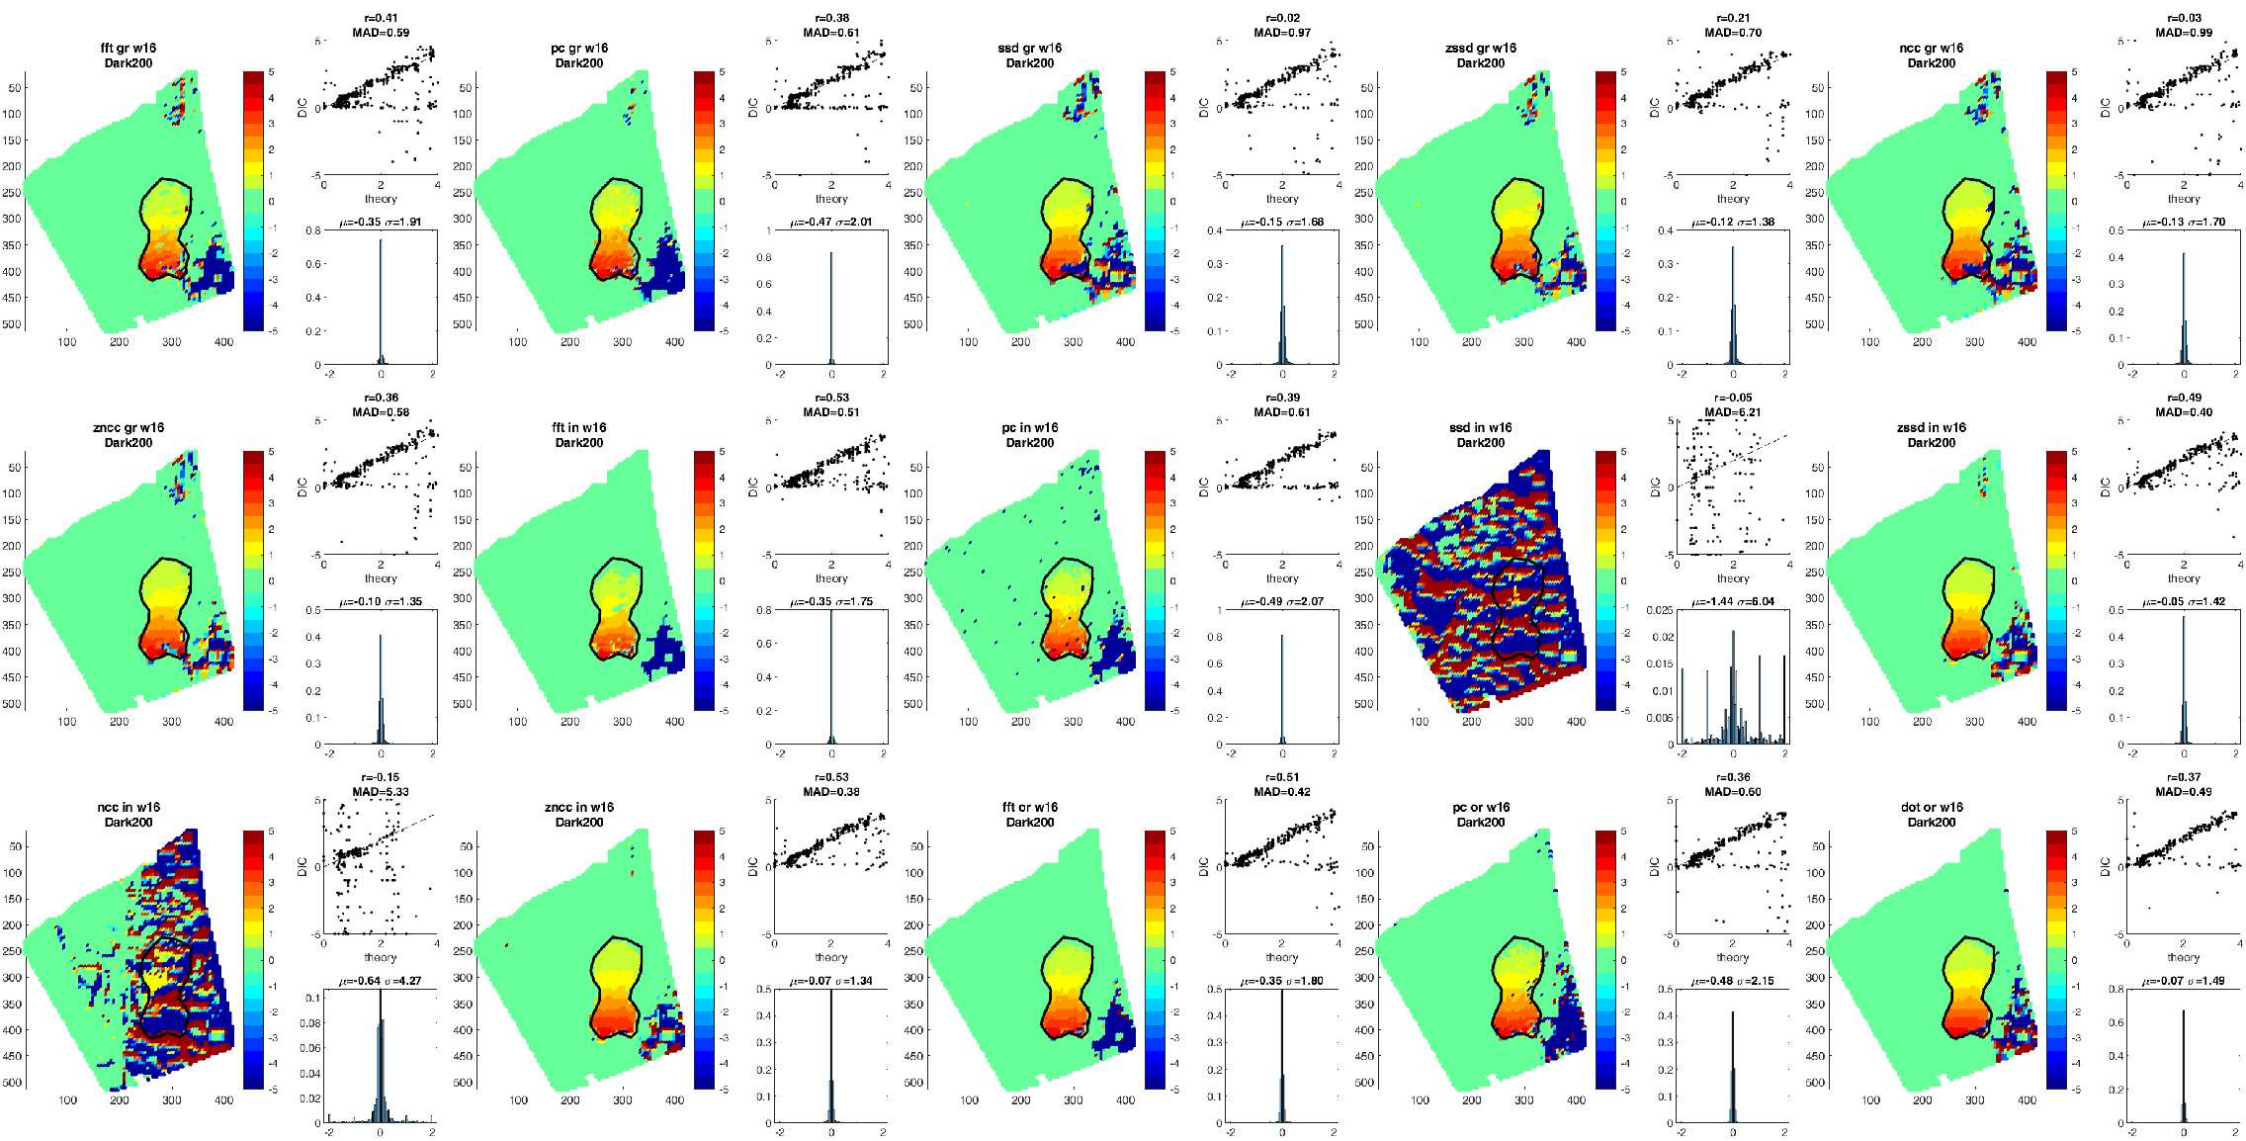



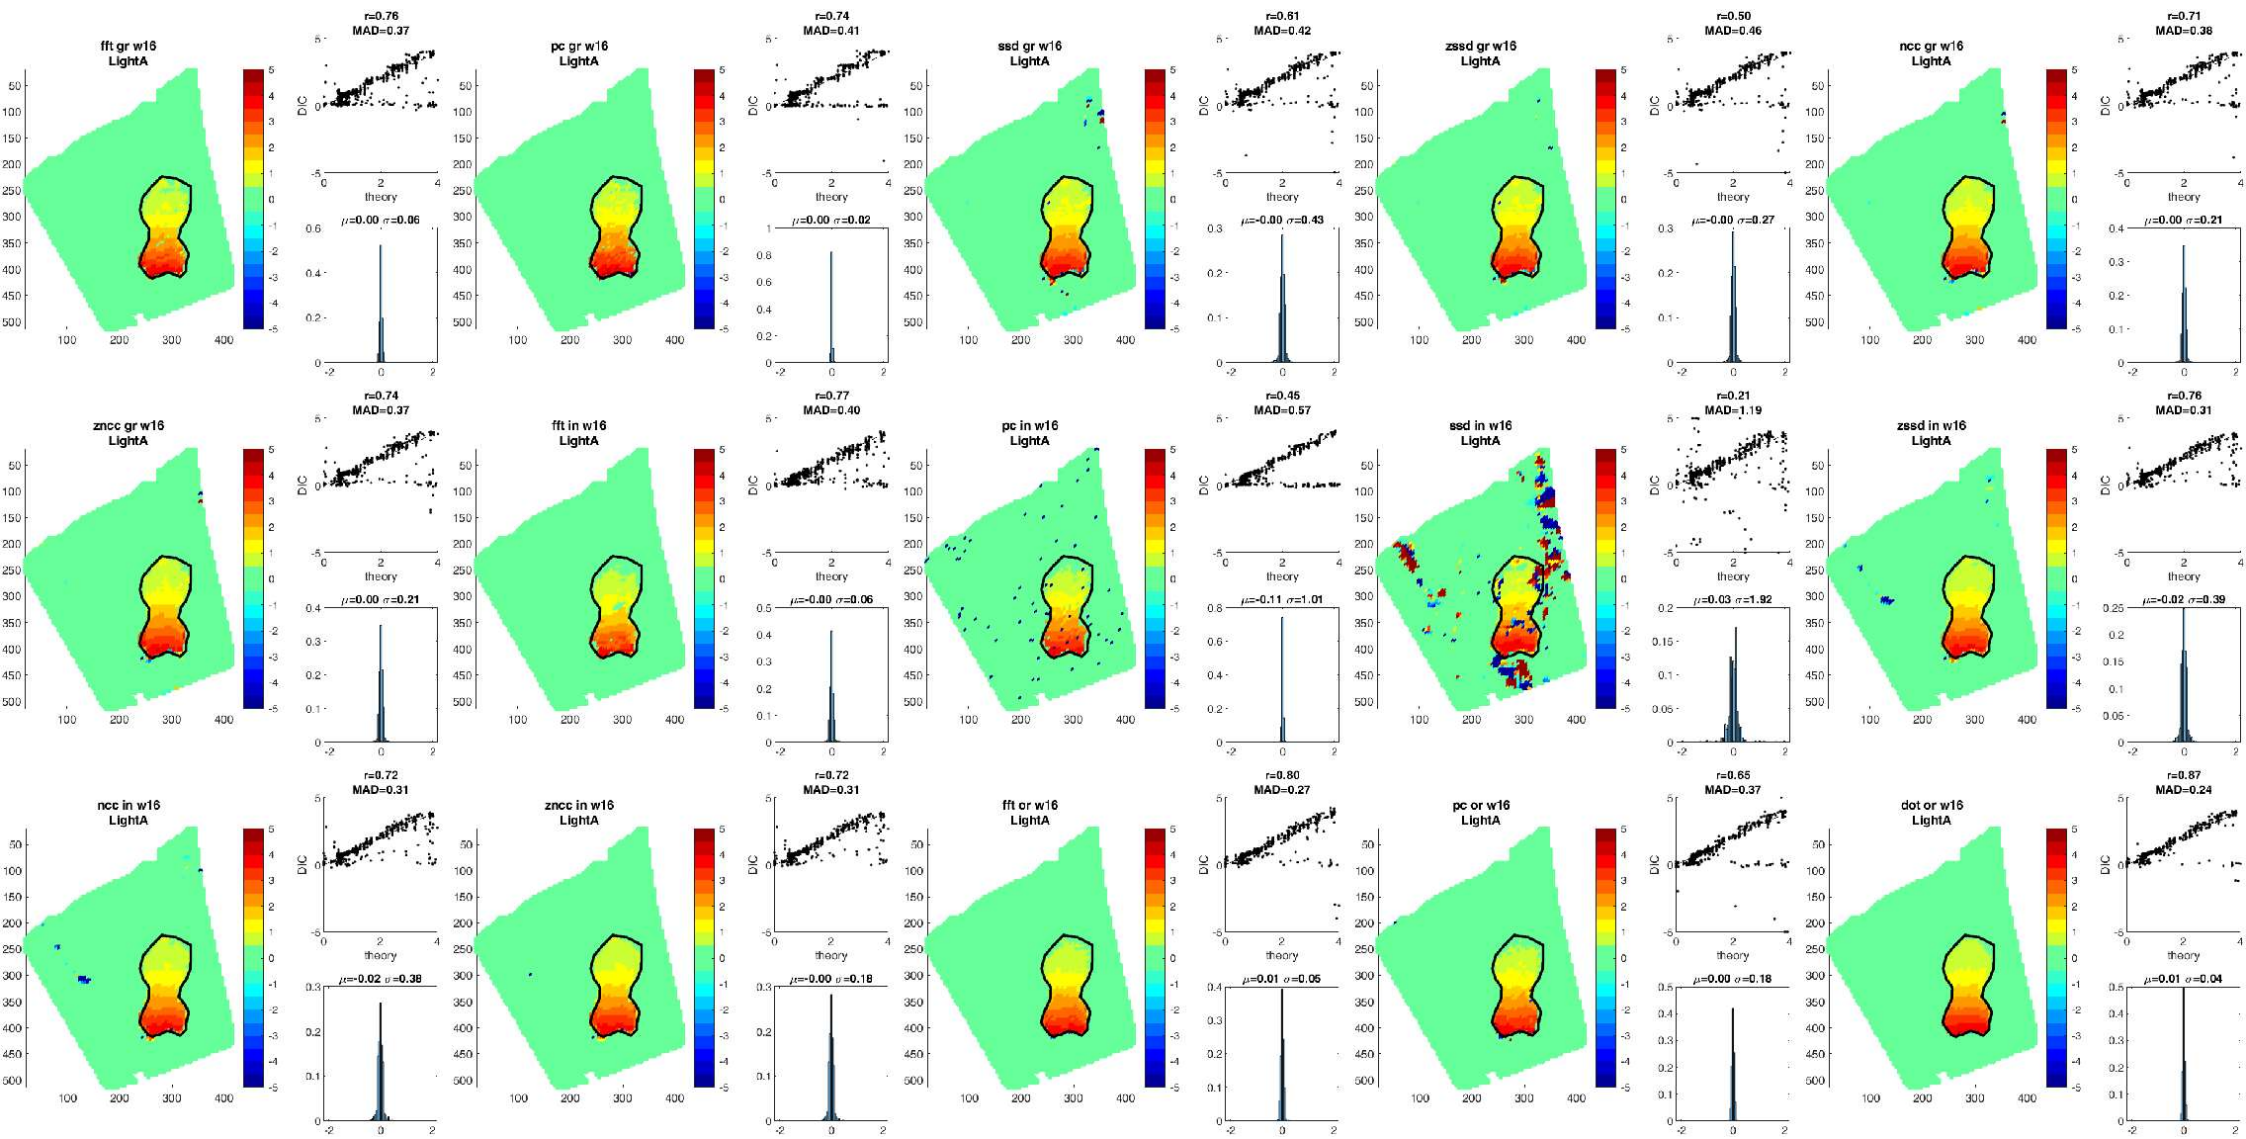

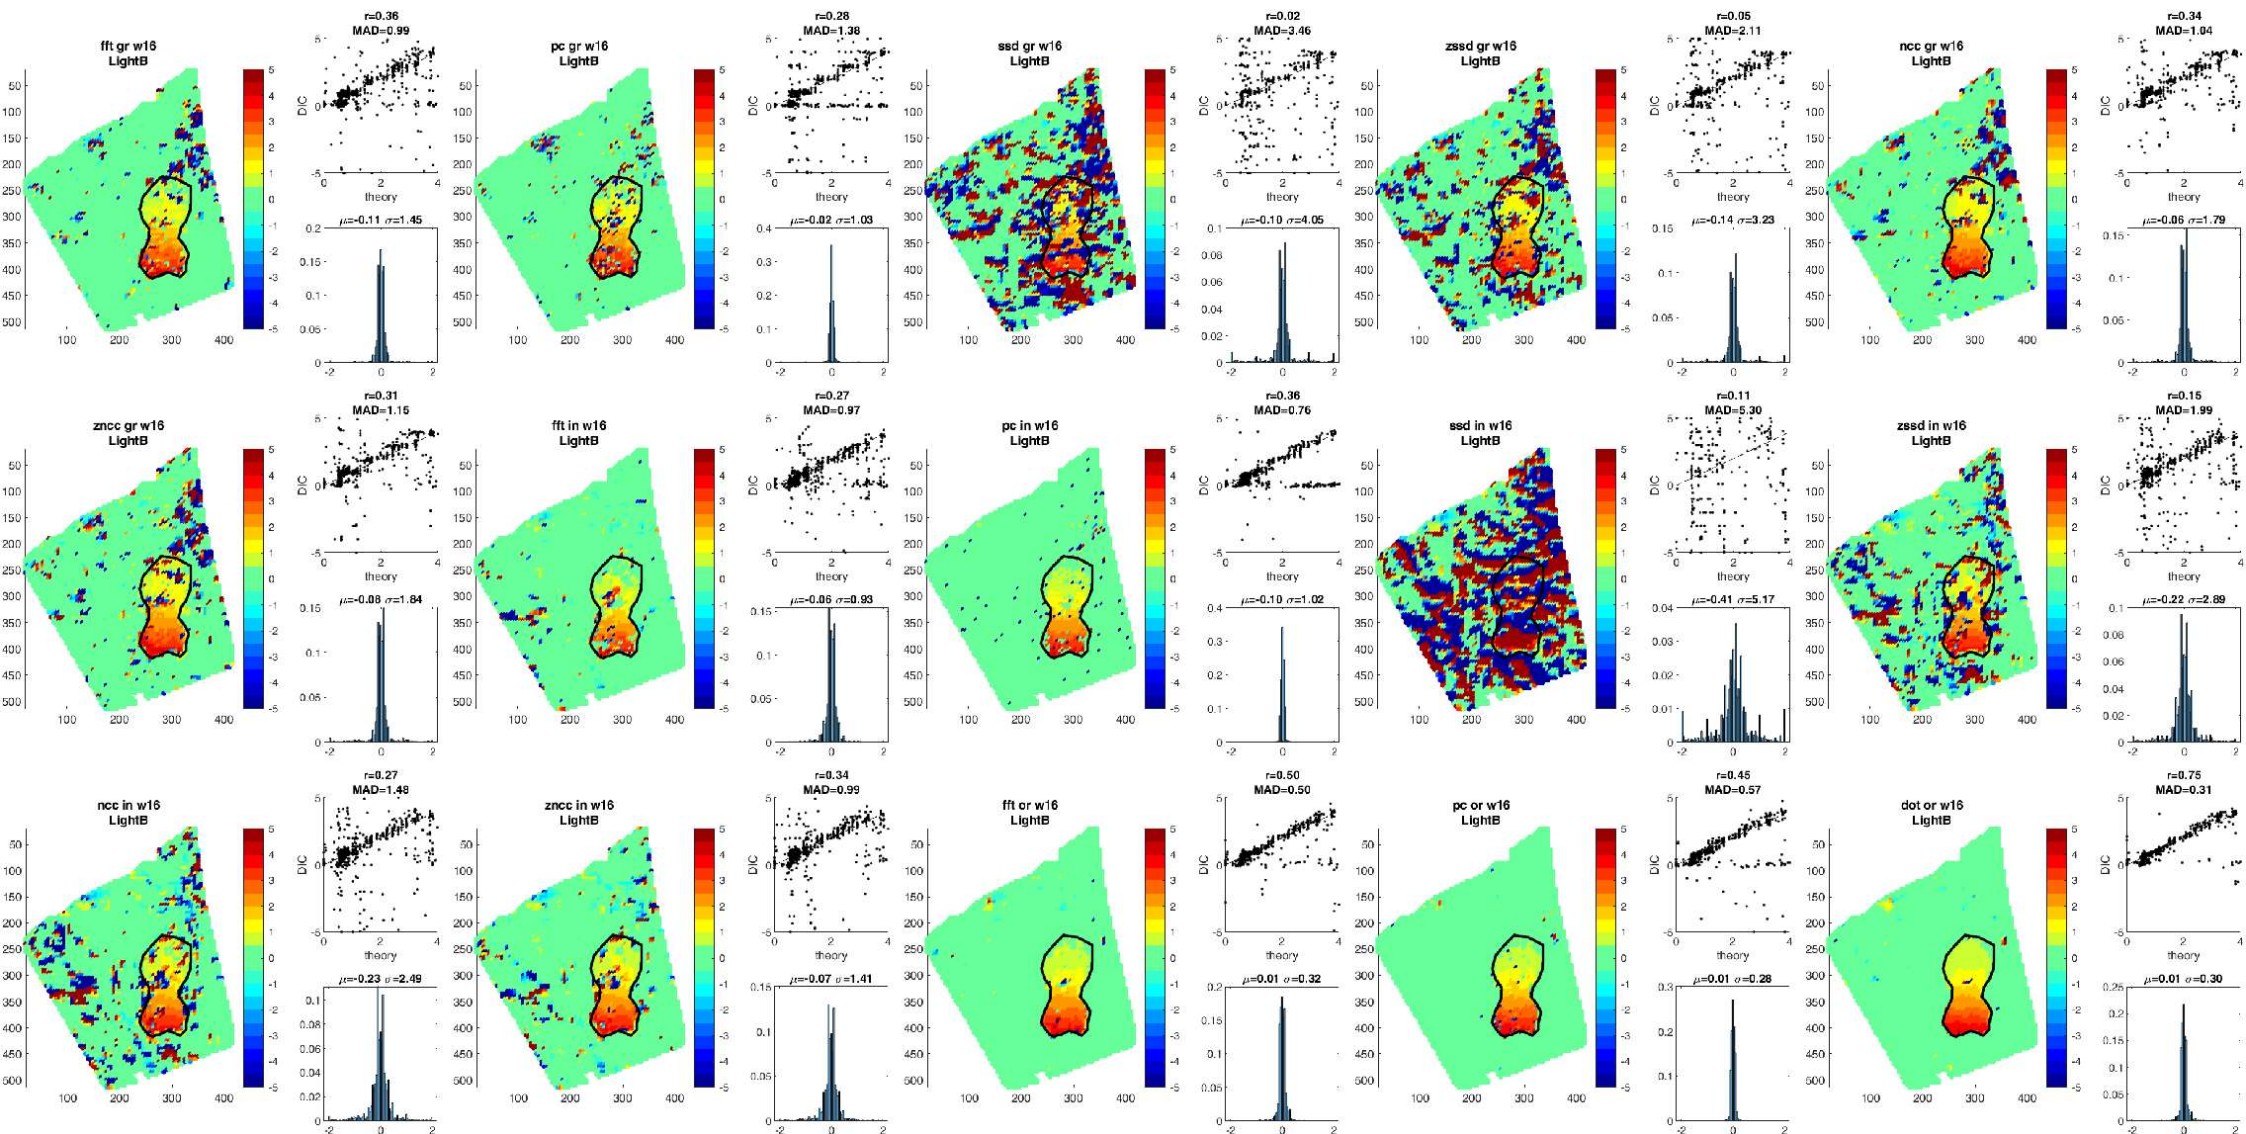



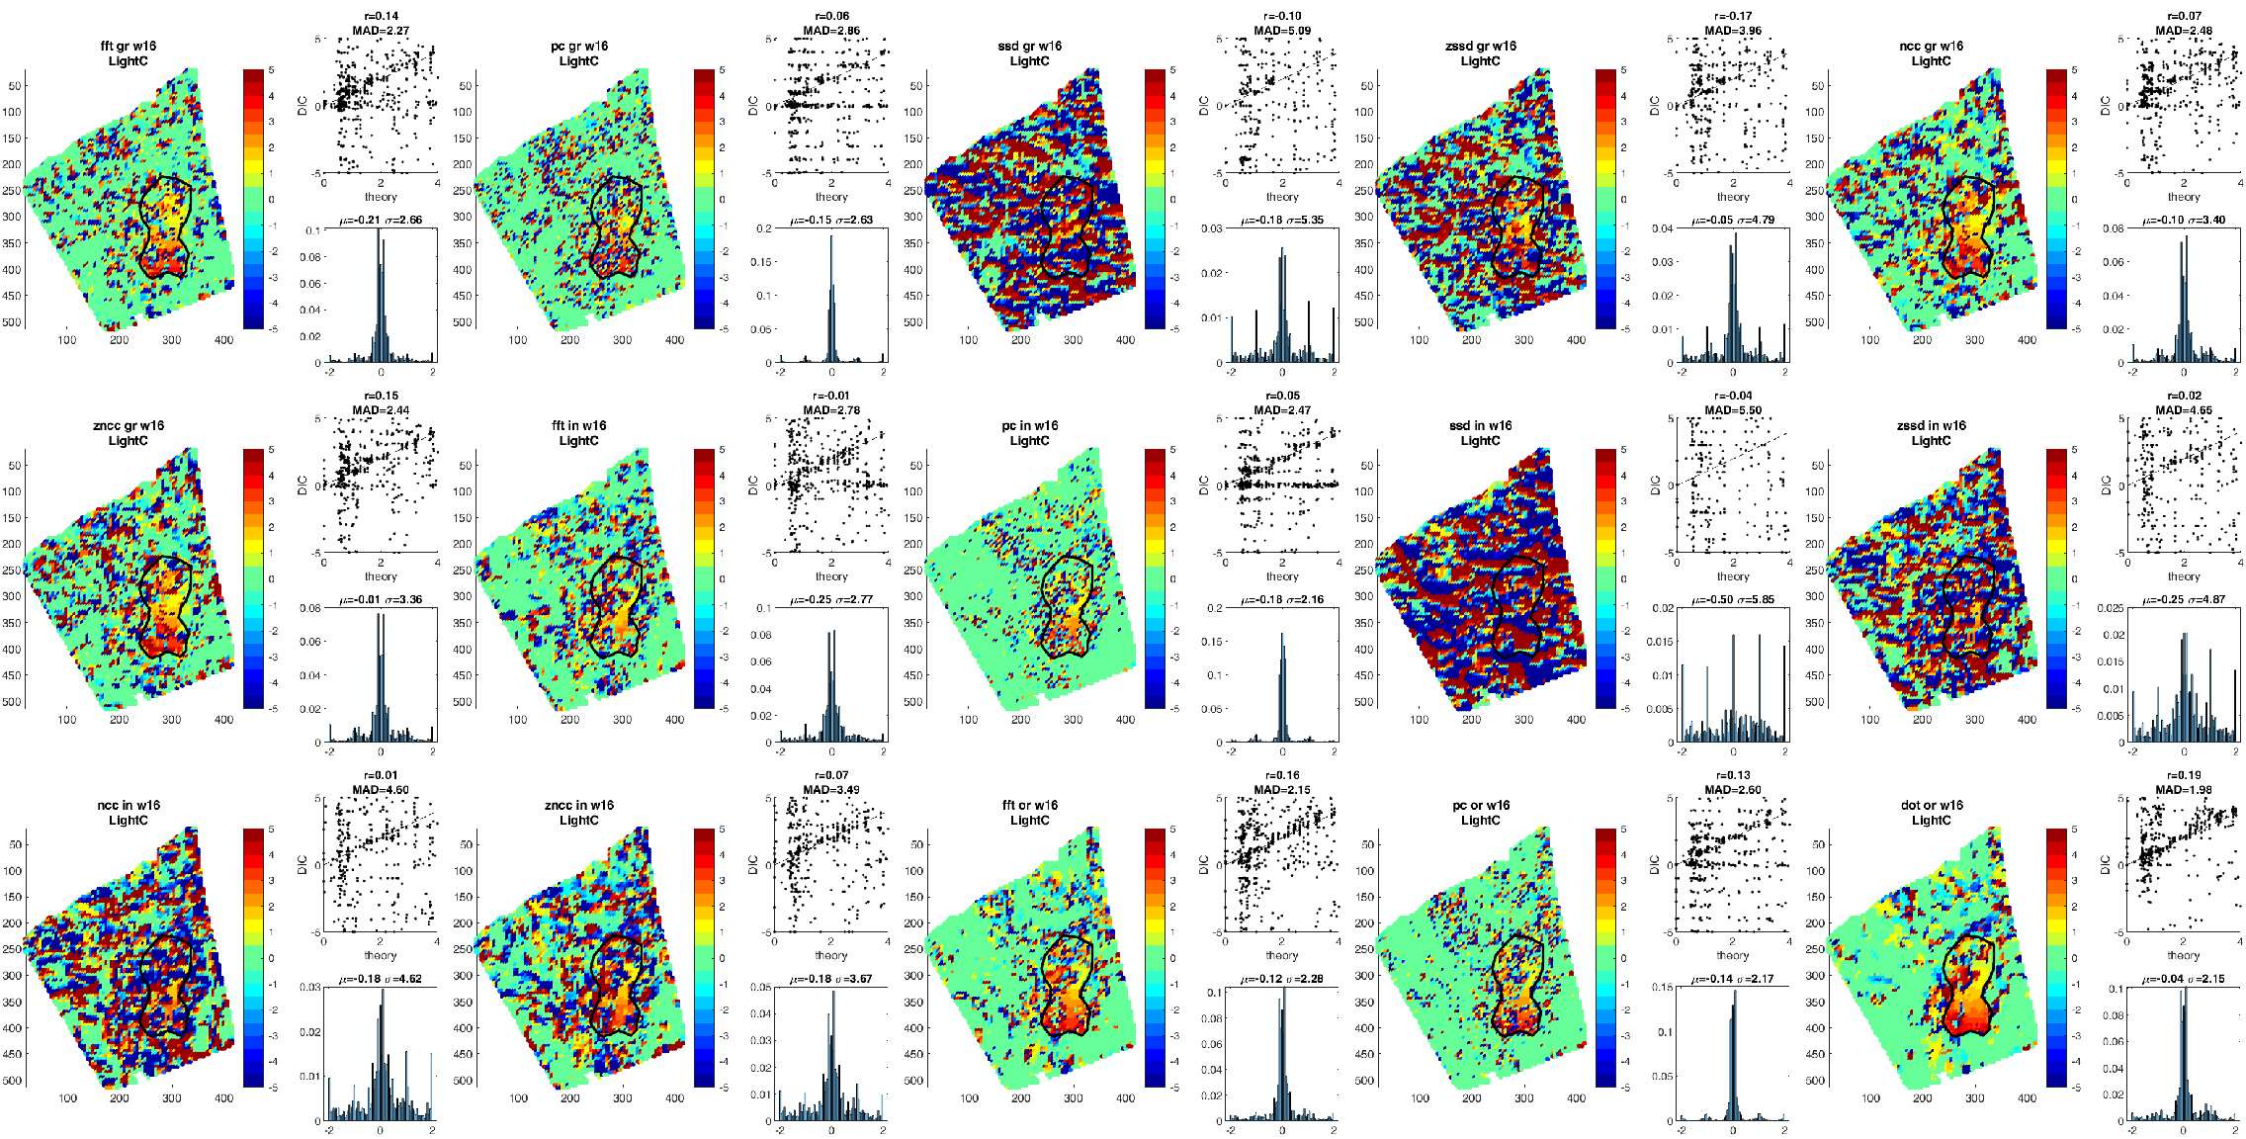



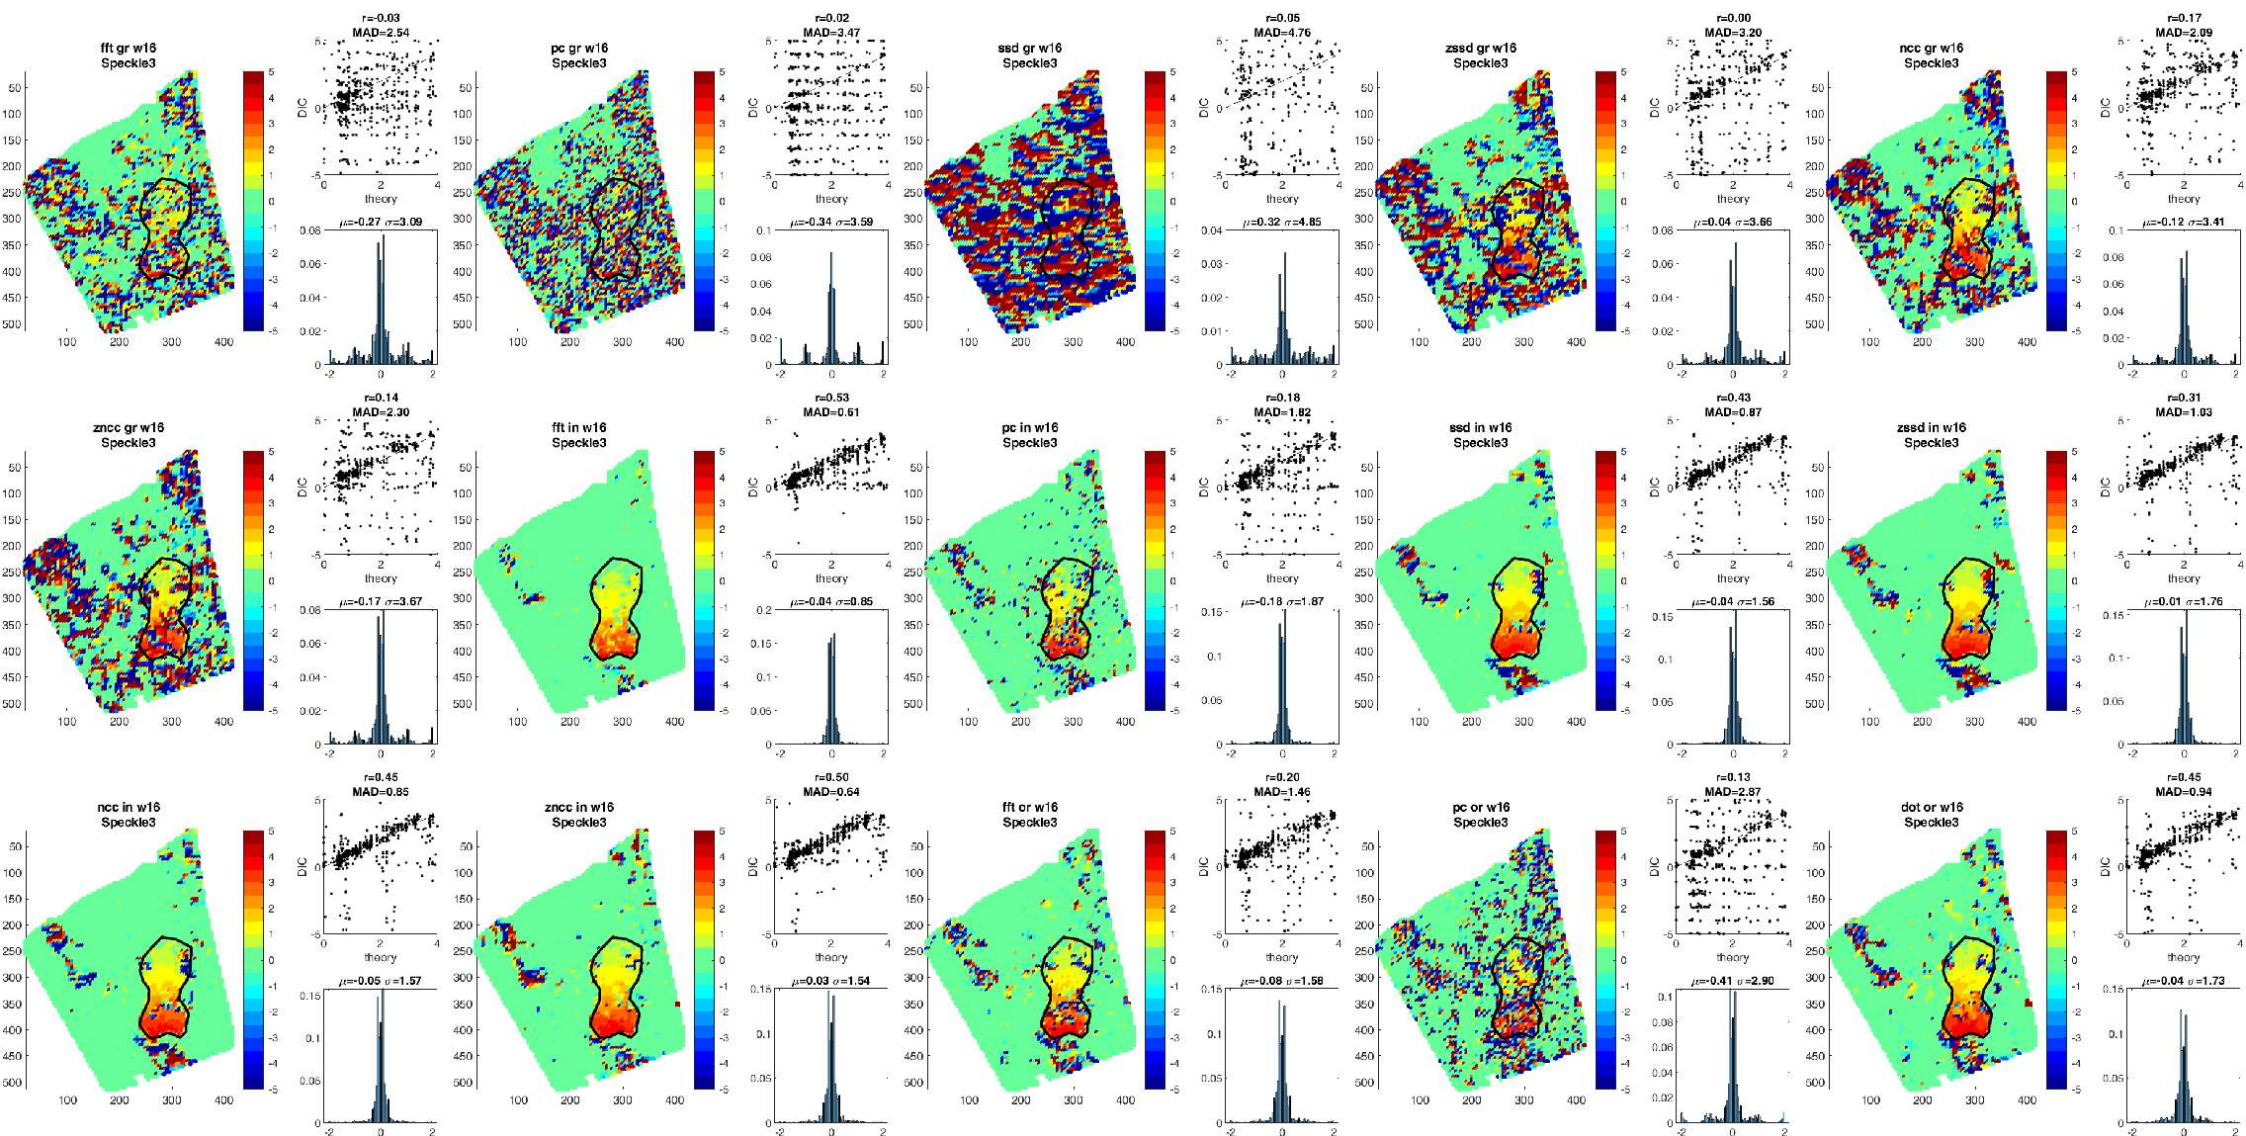



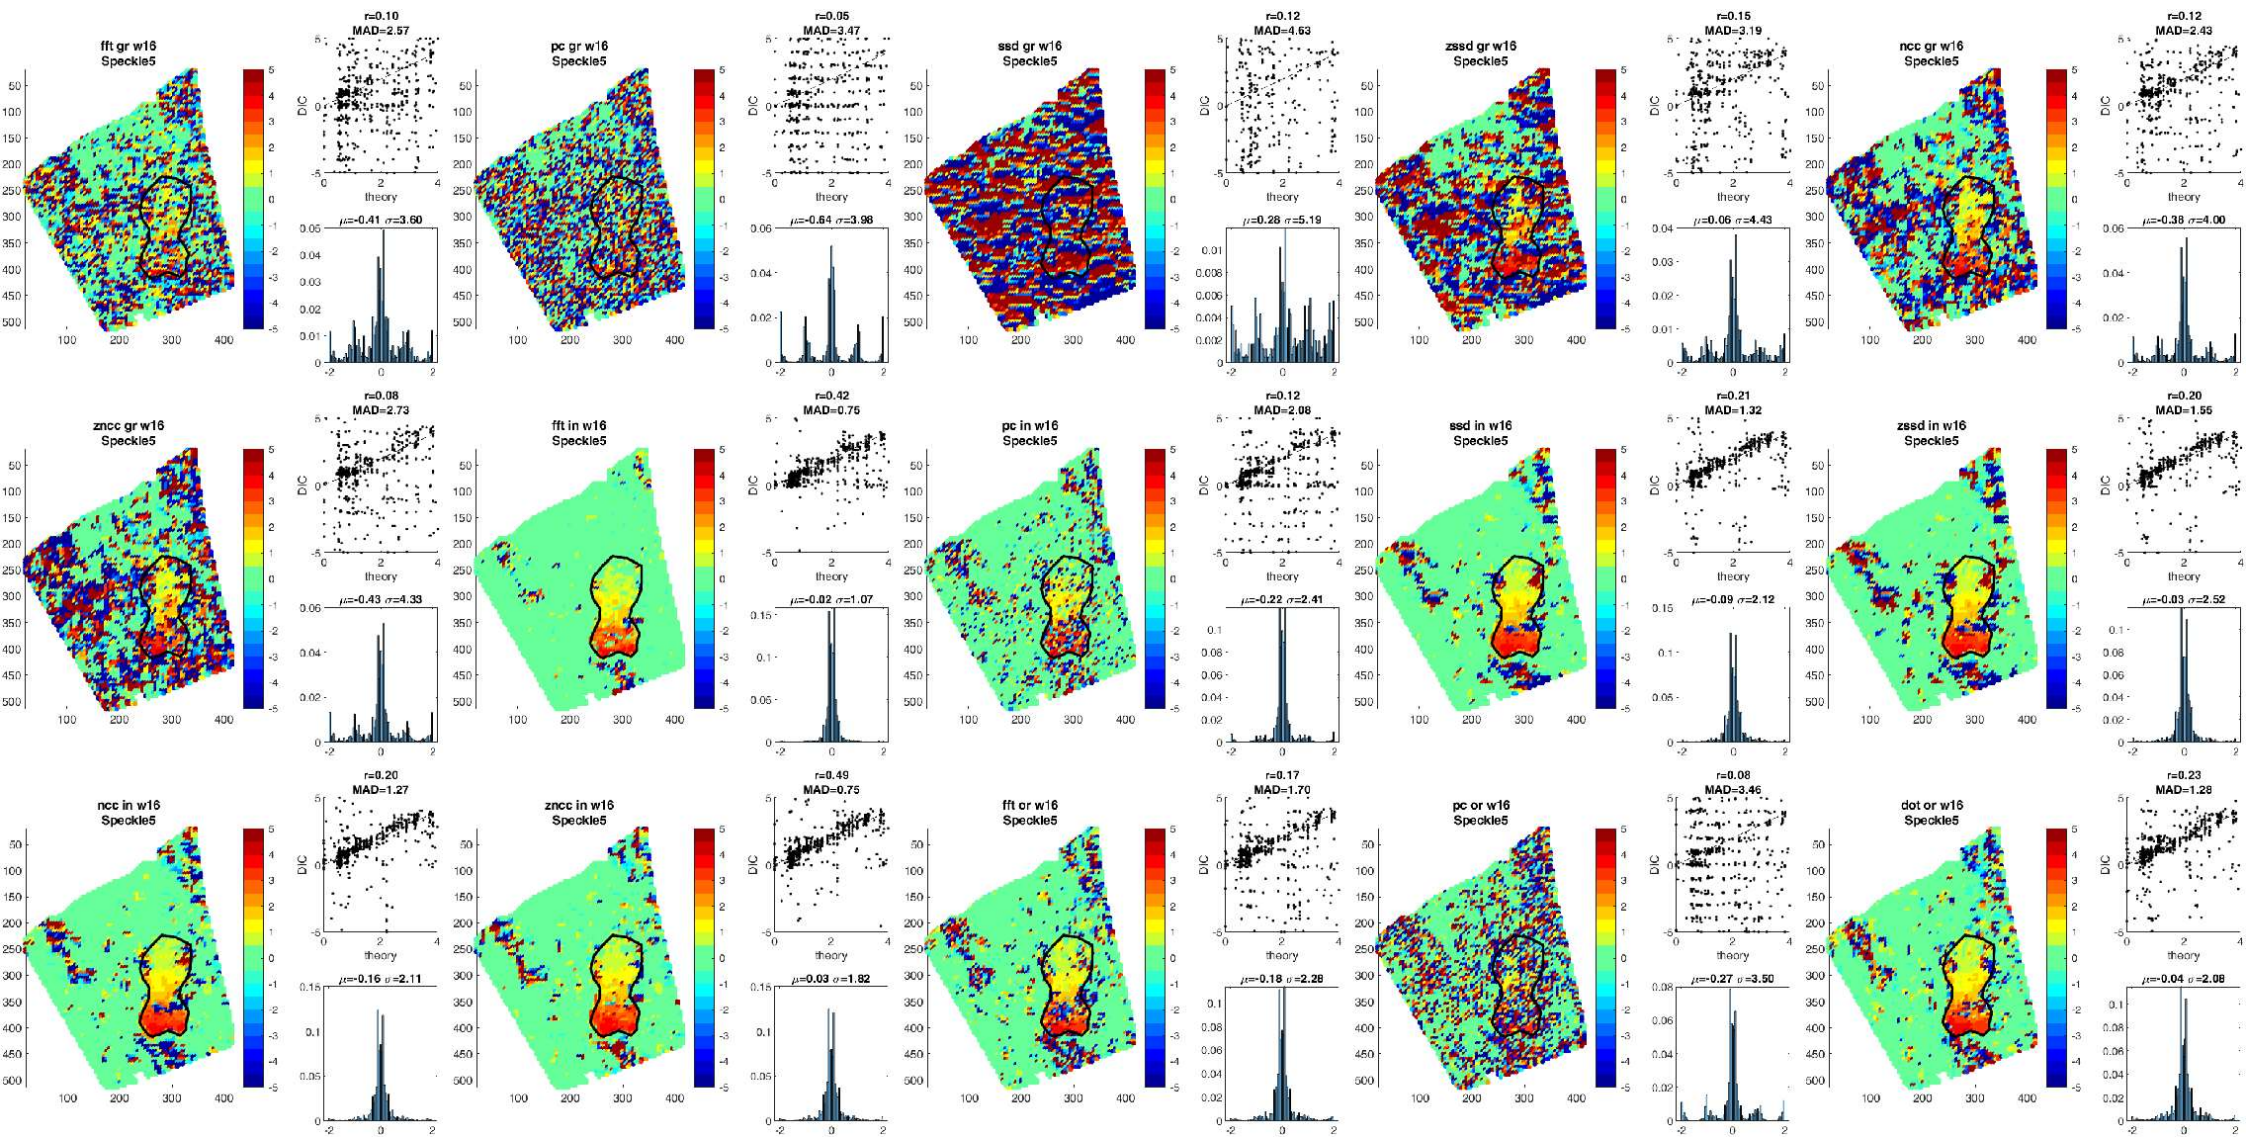



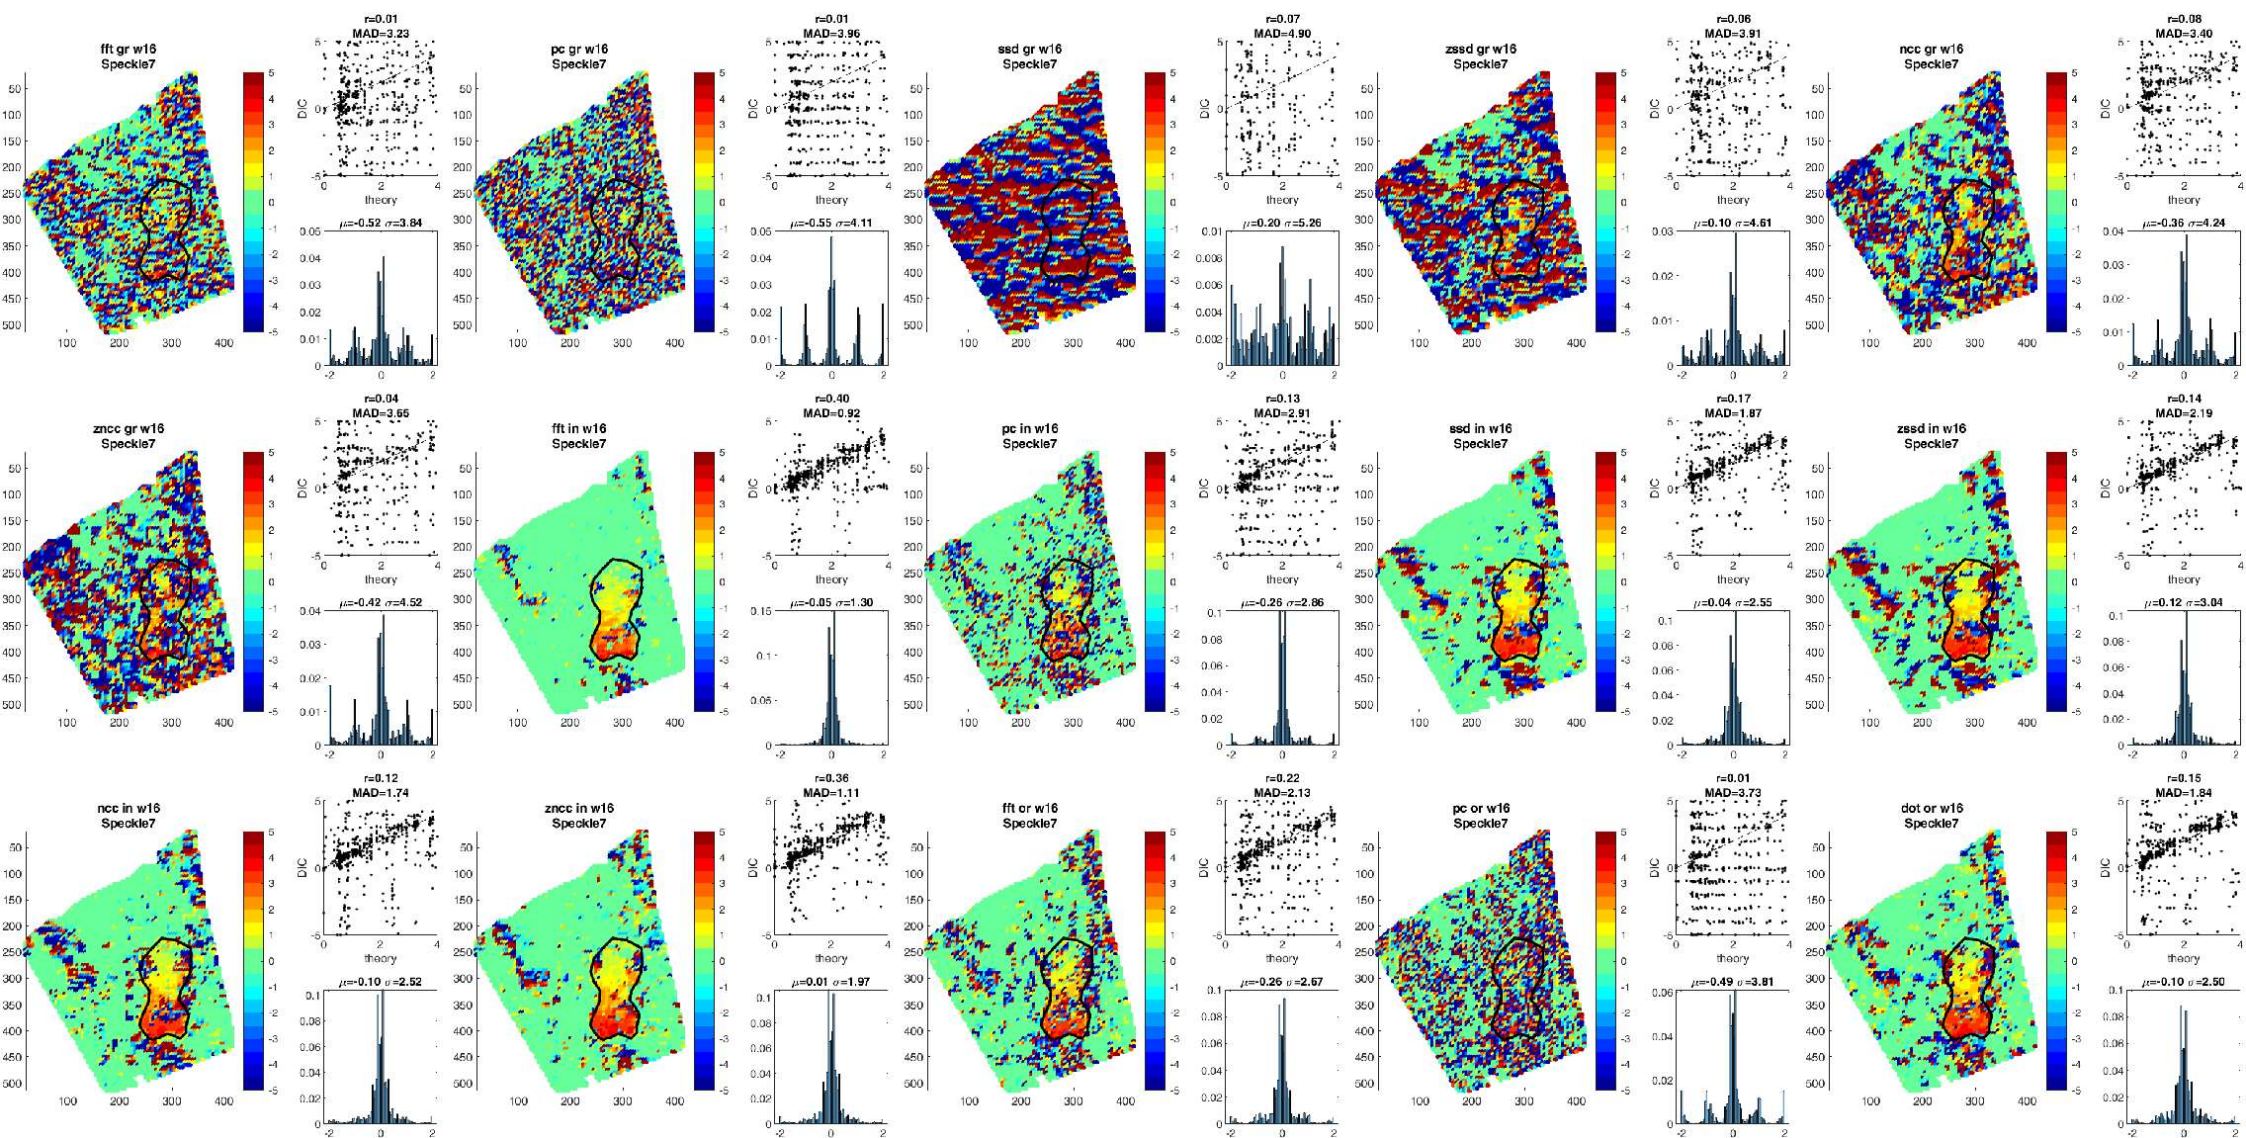



Template size 32x32

# motlm

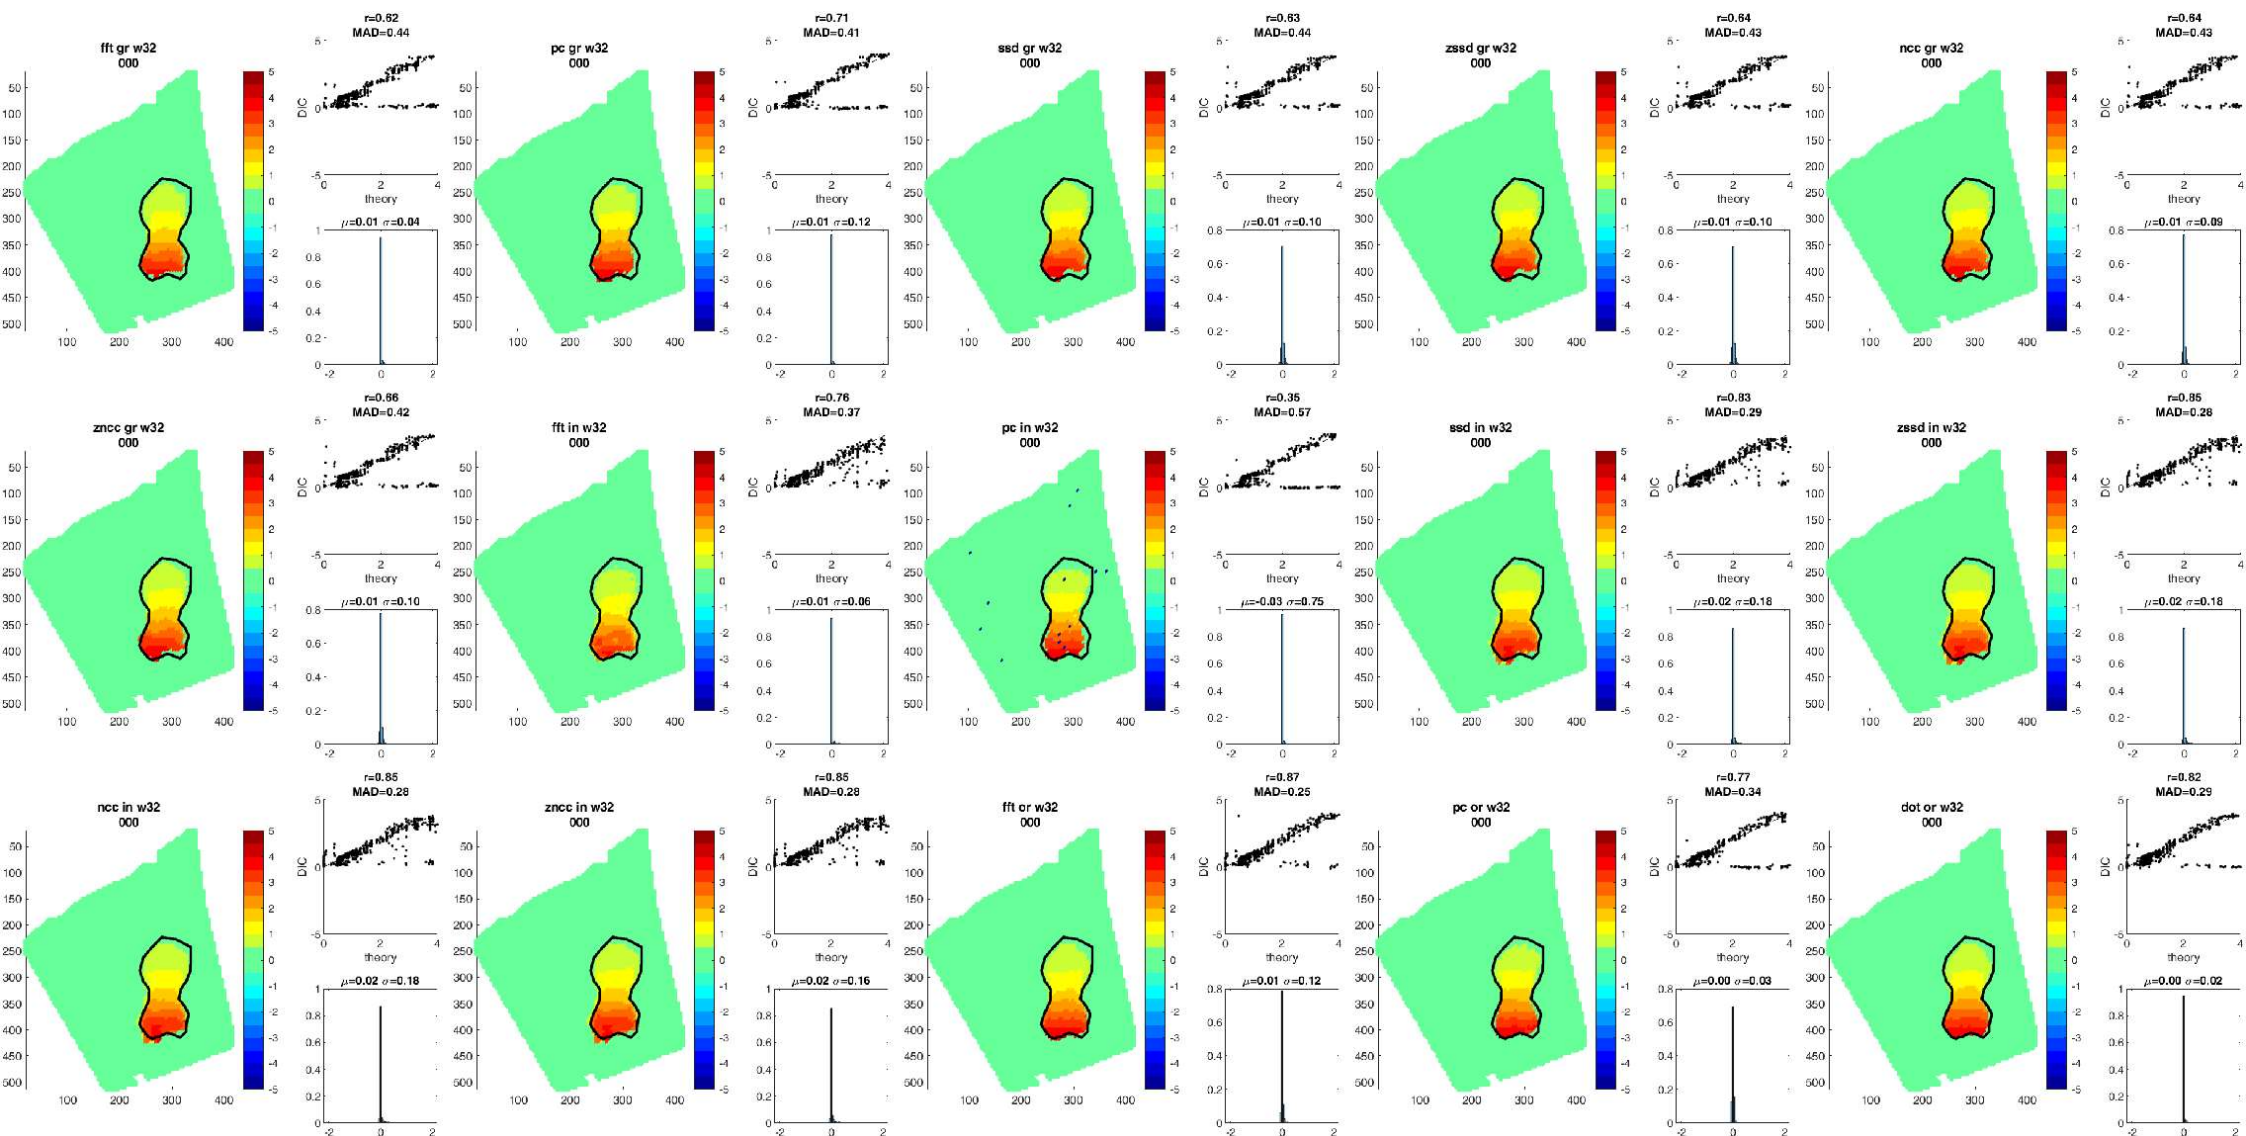



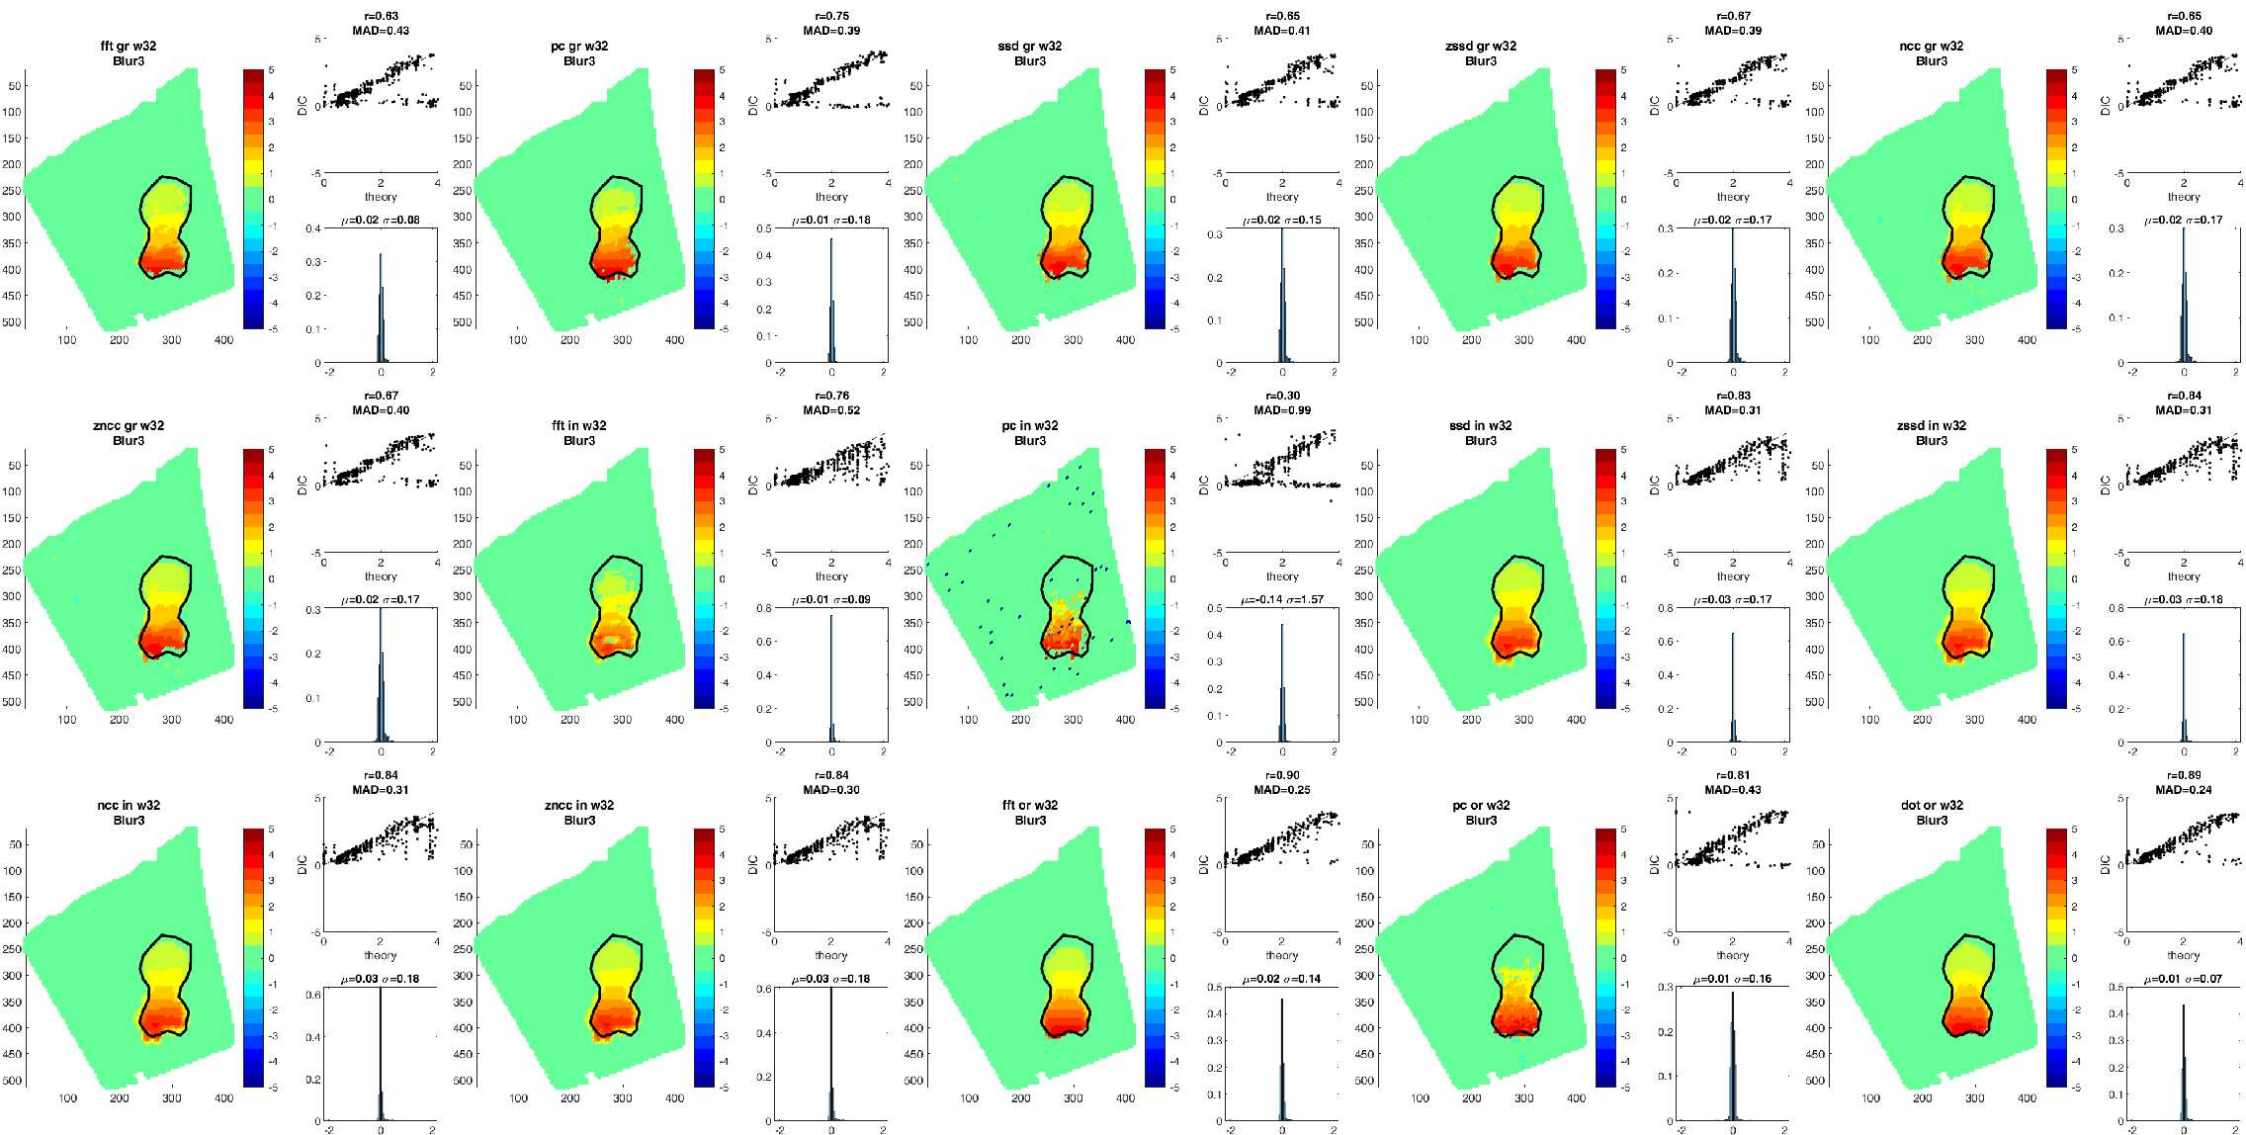

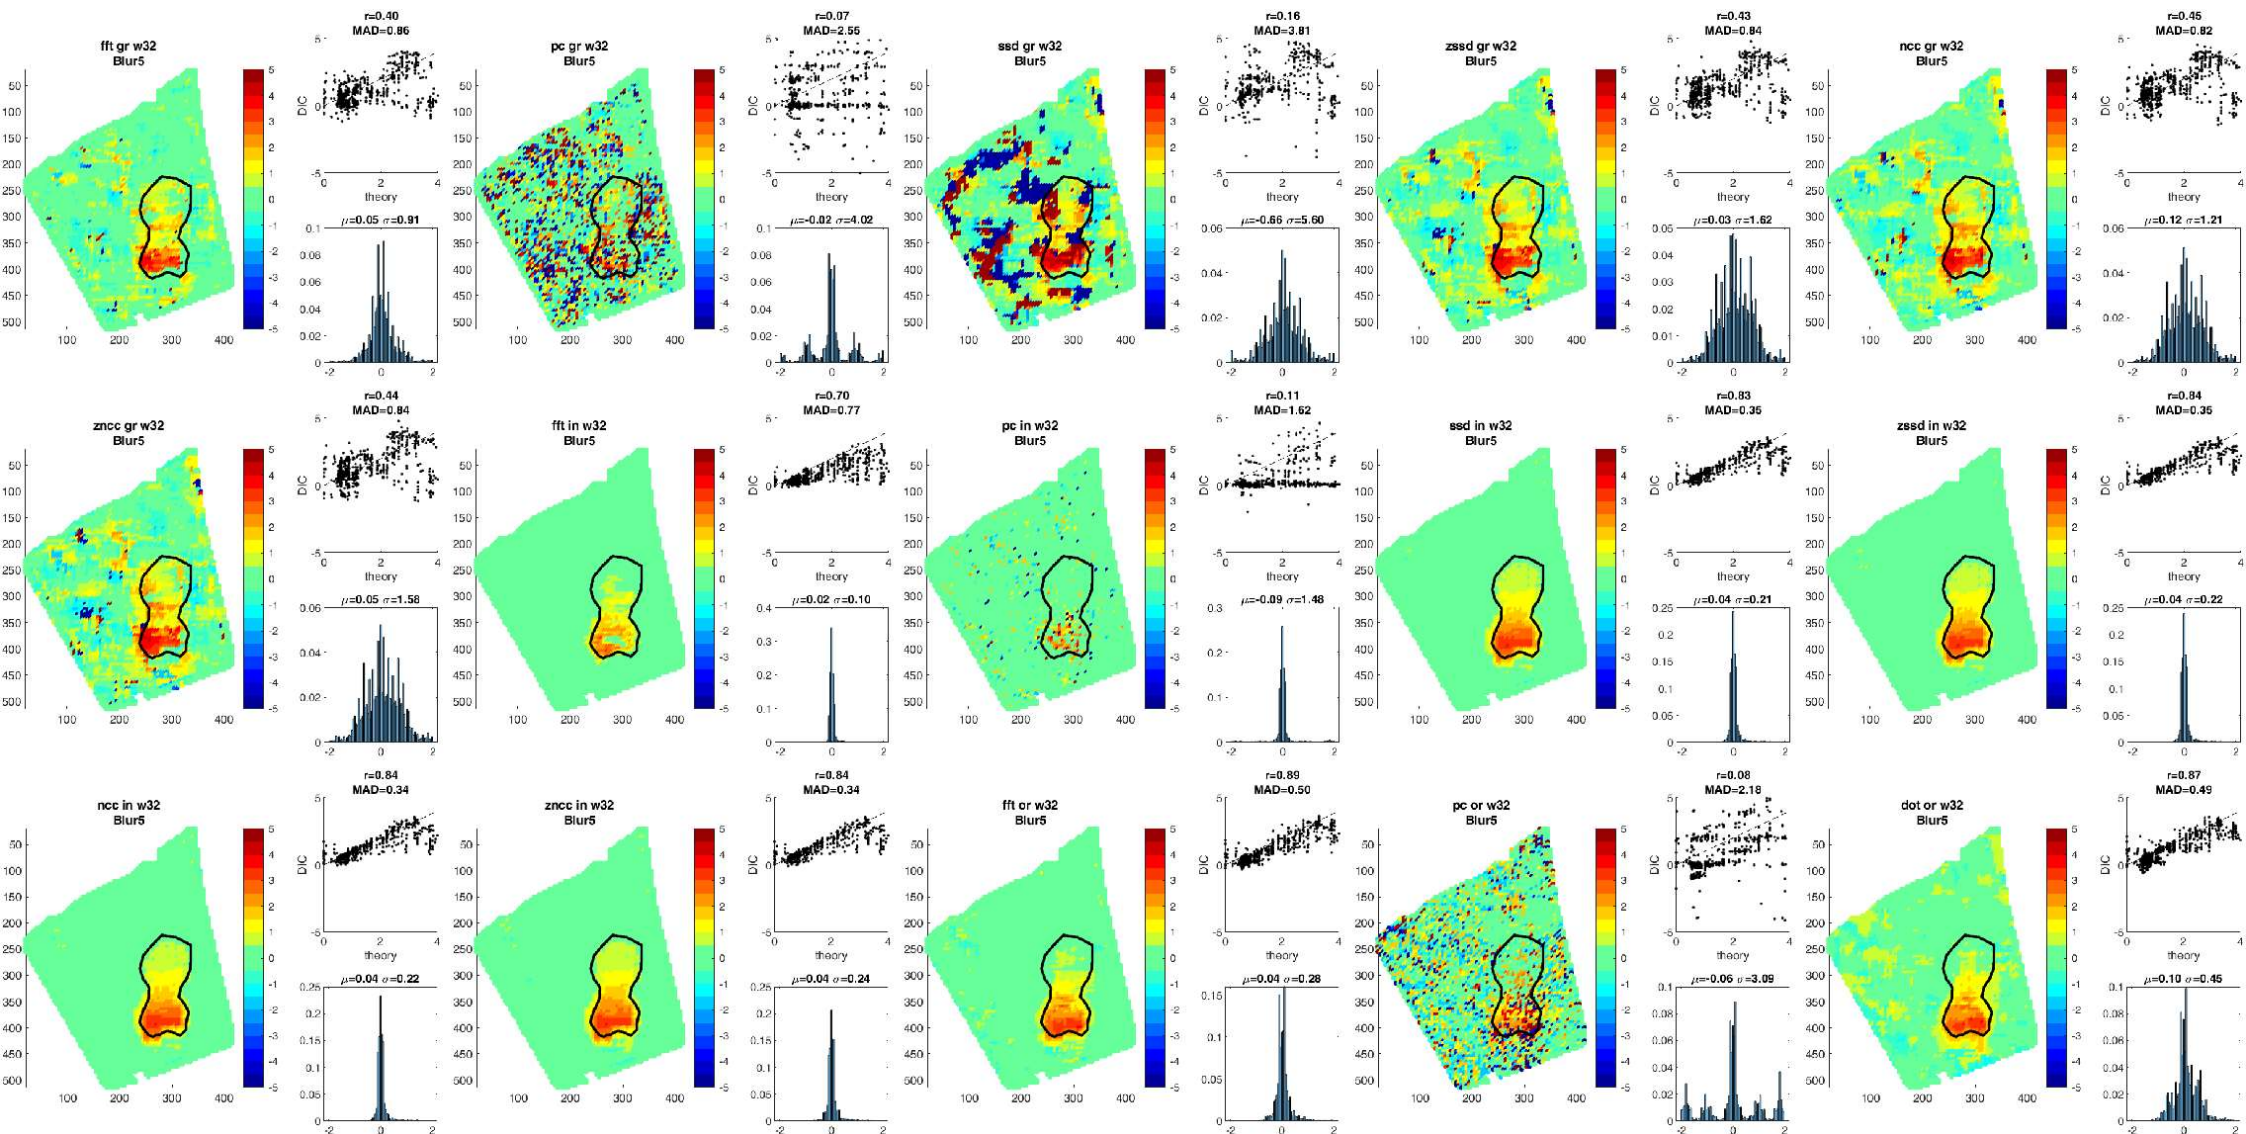



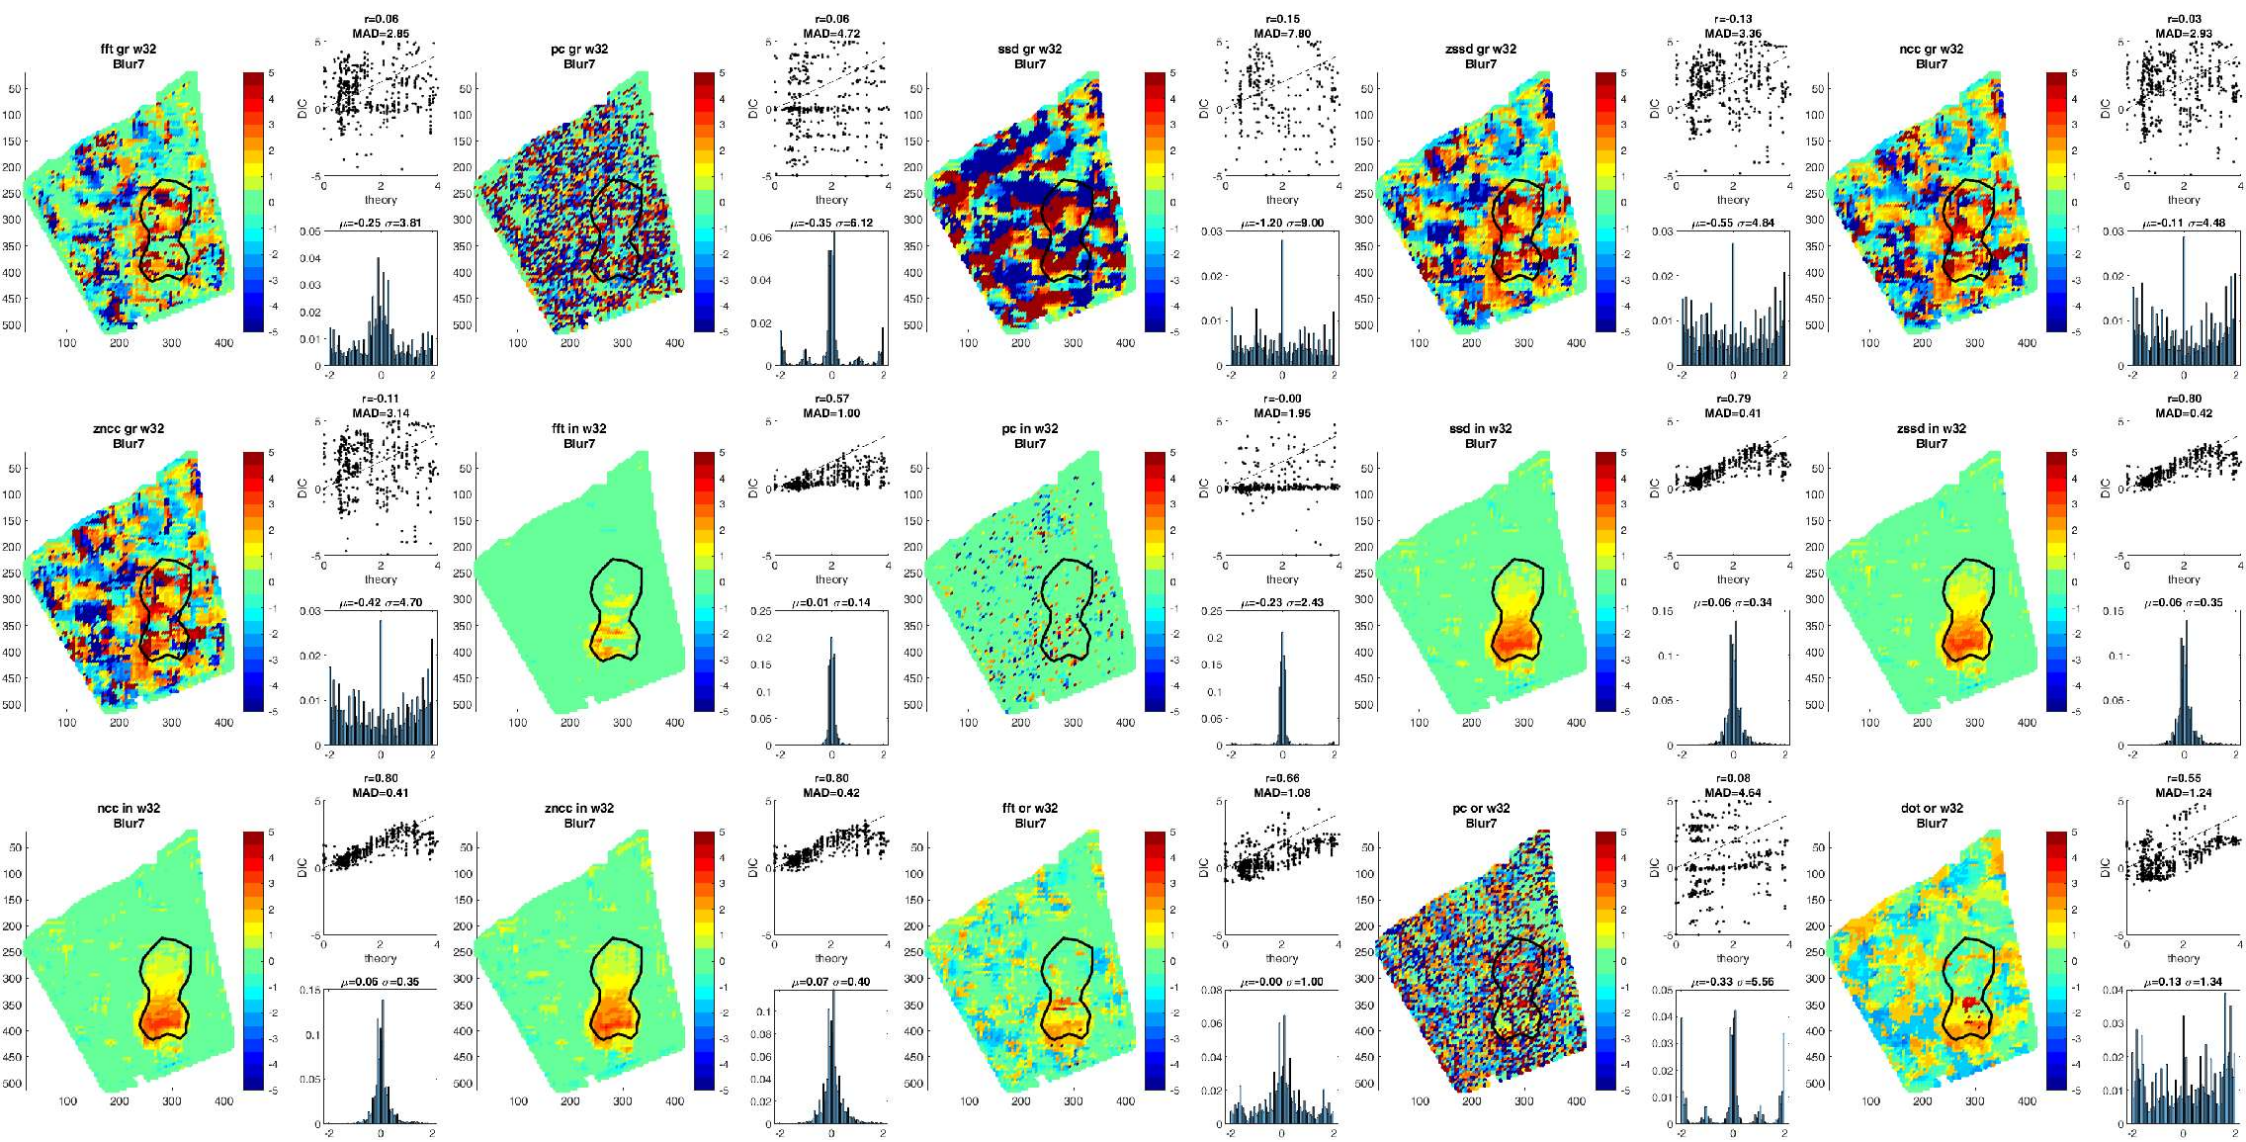

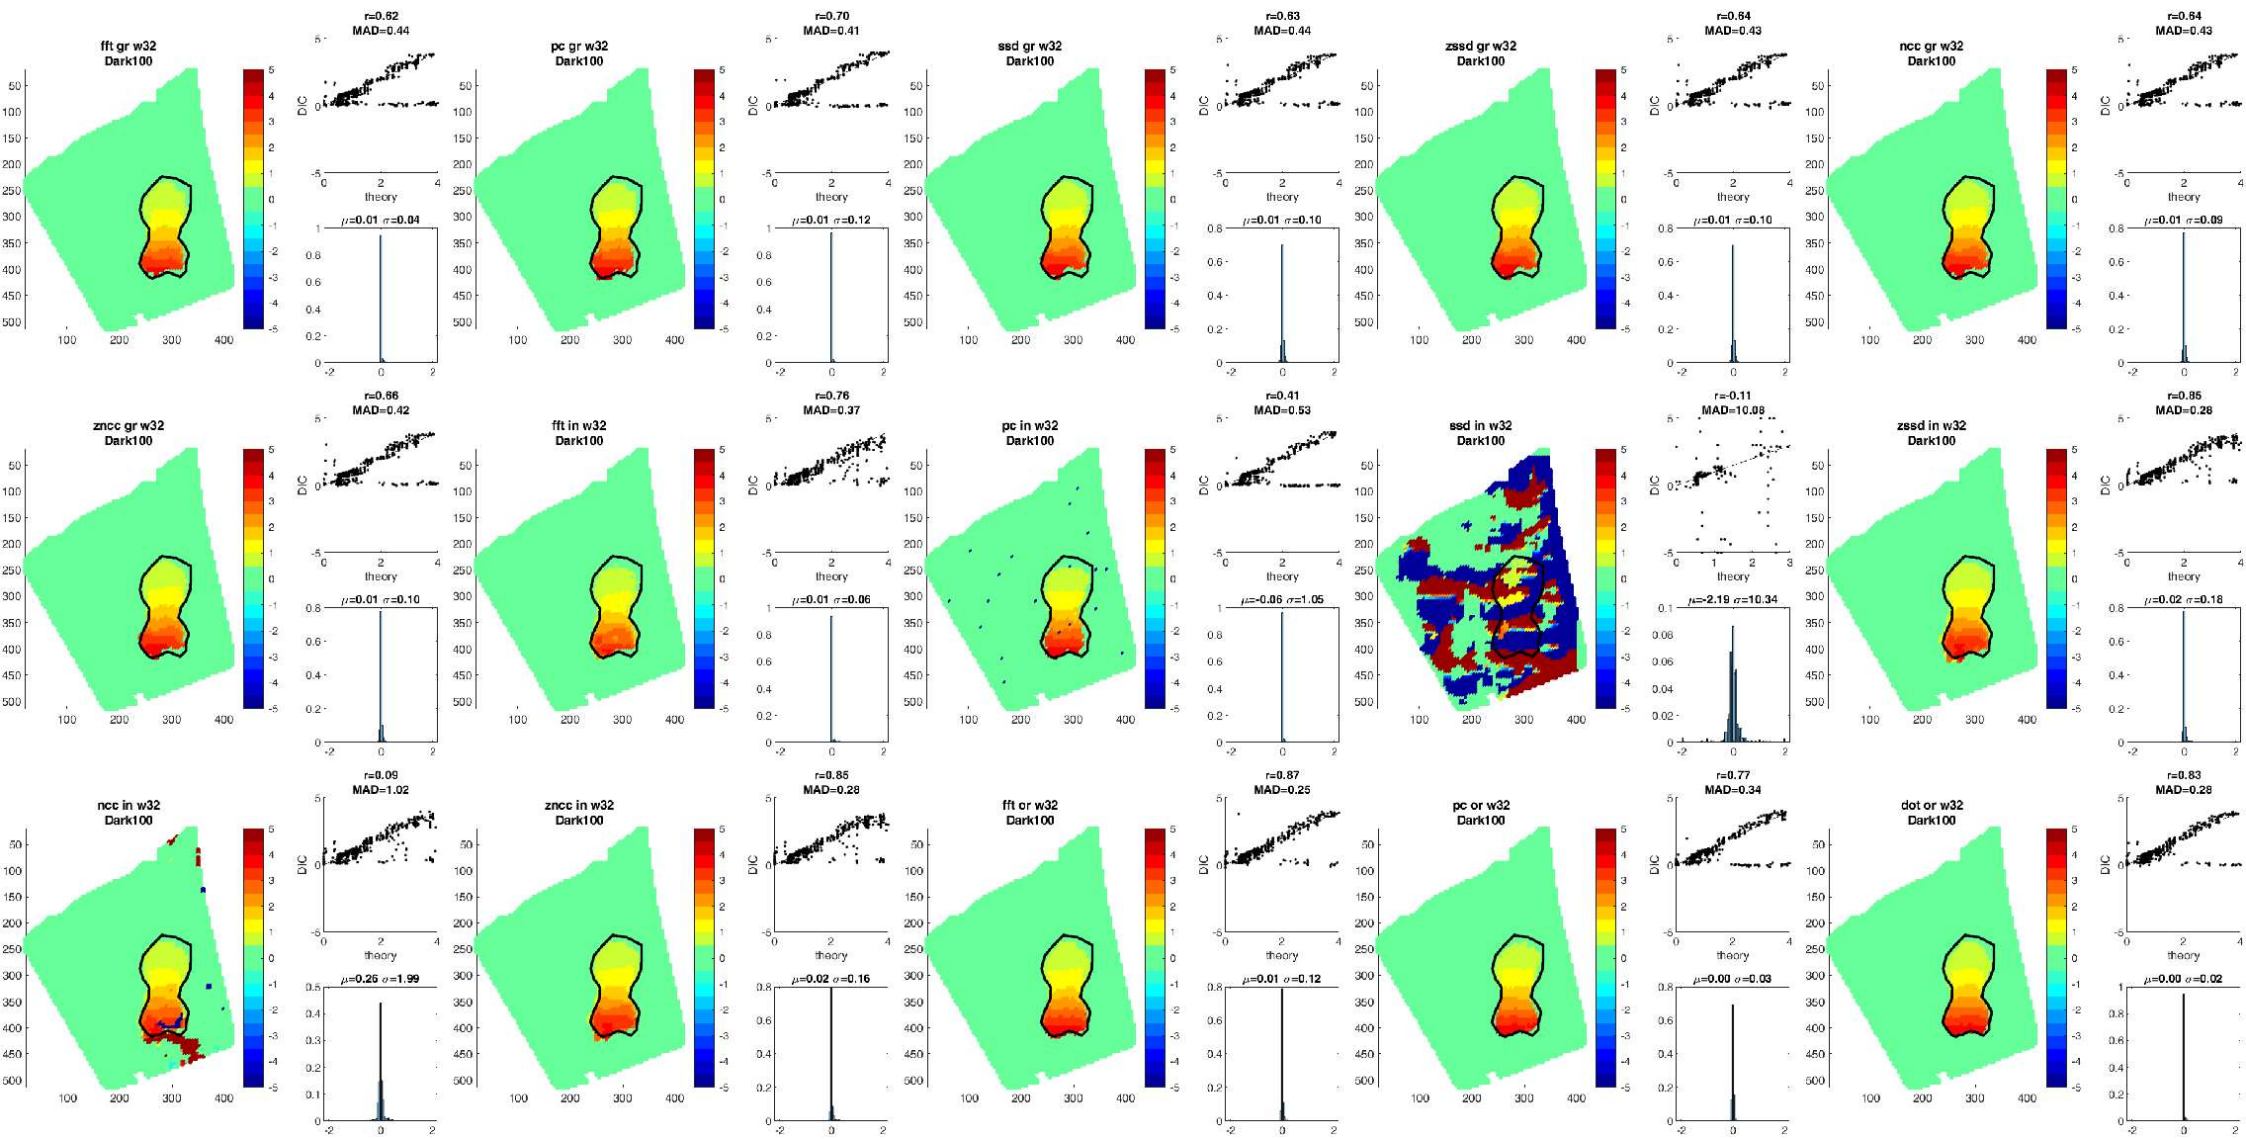



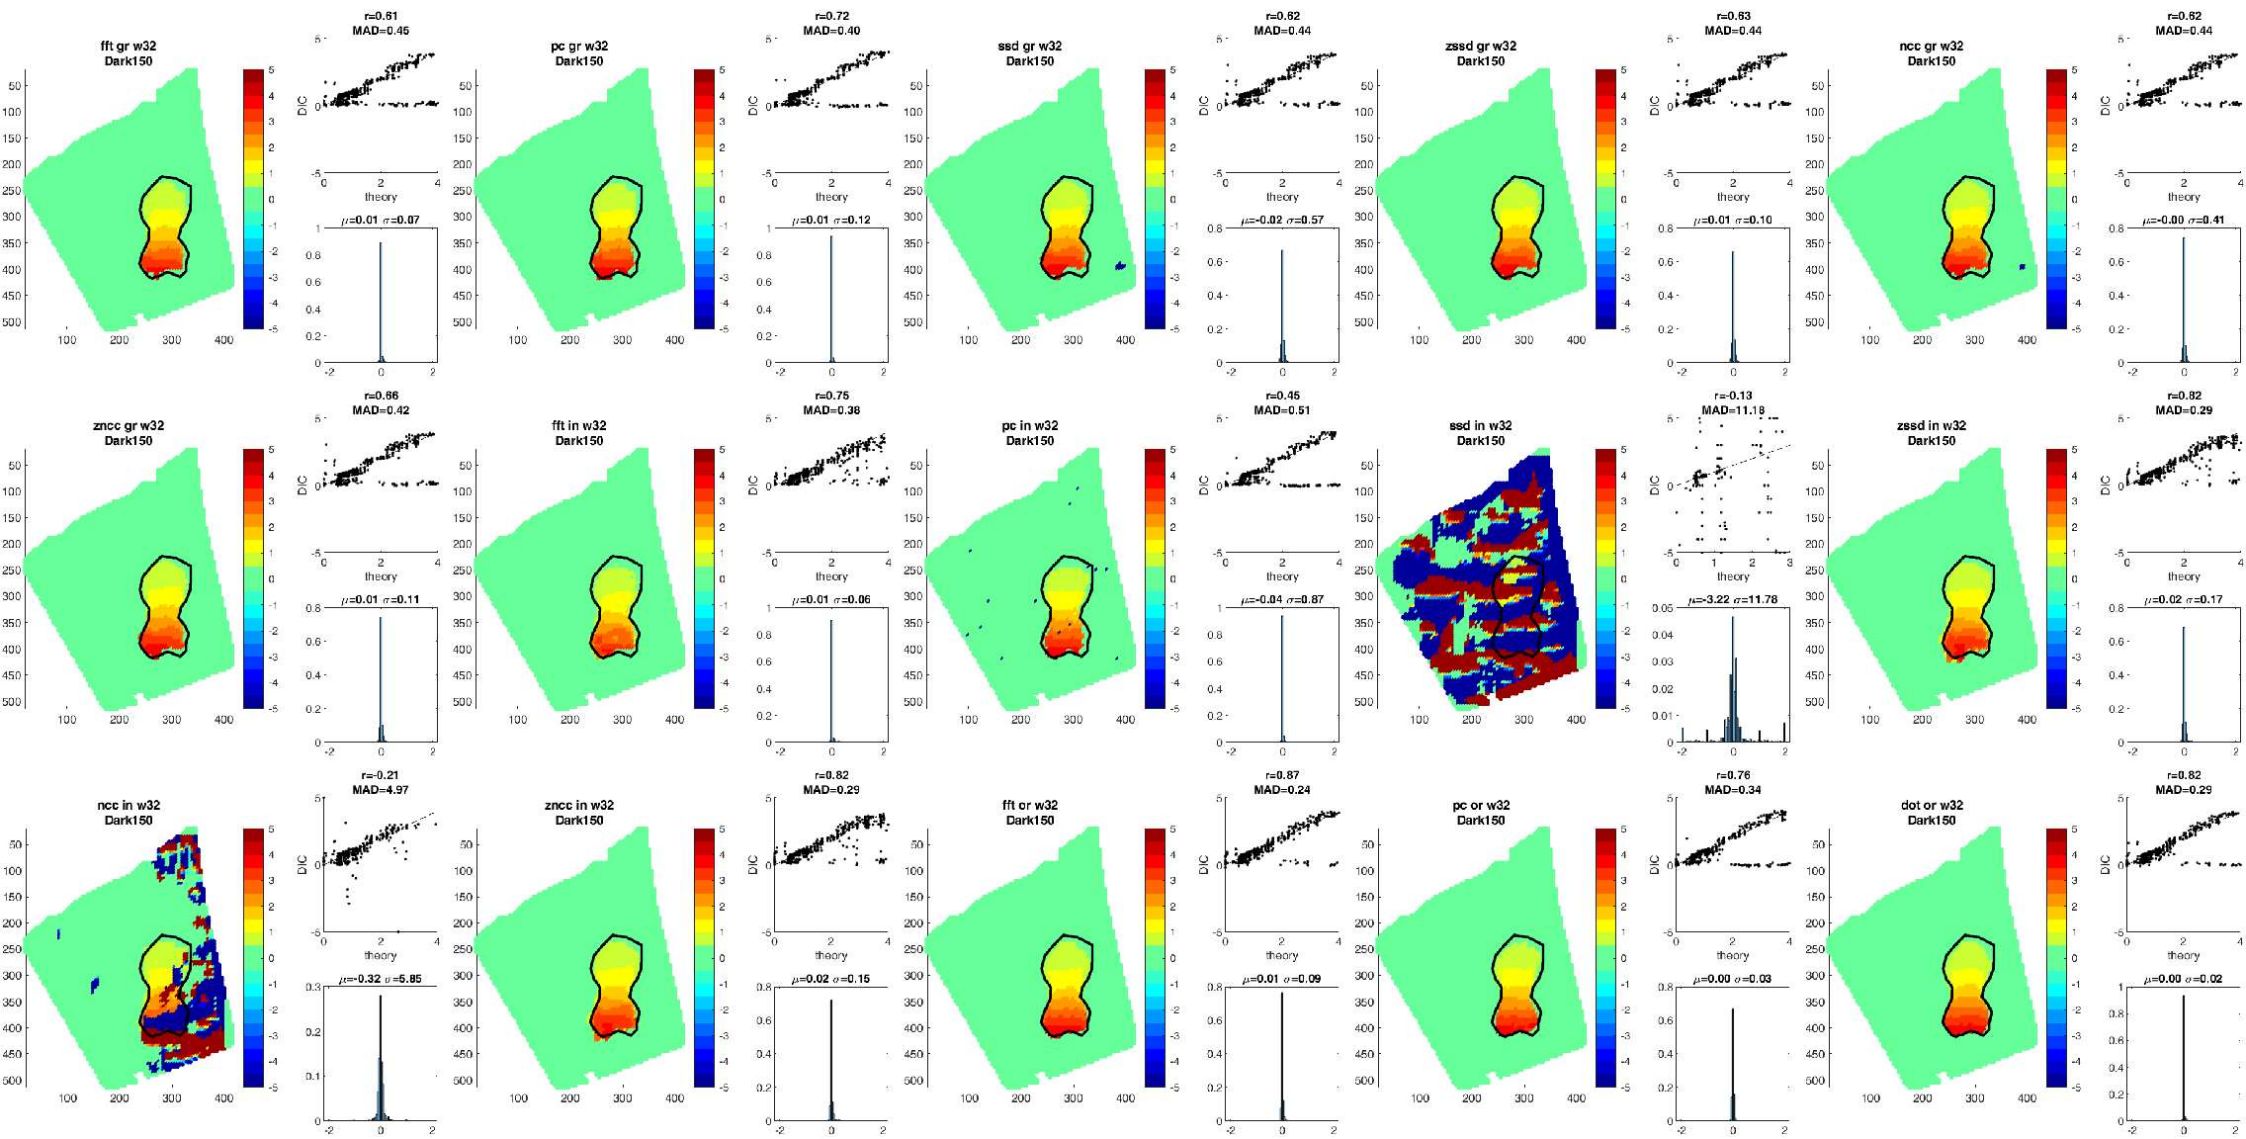

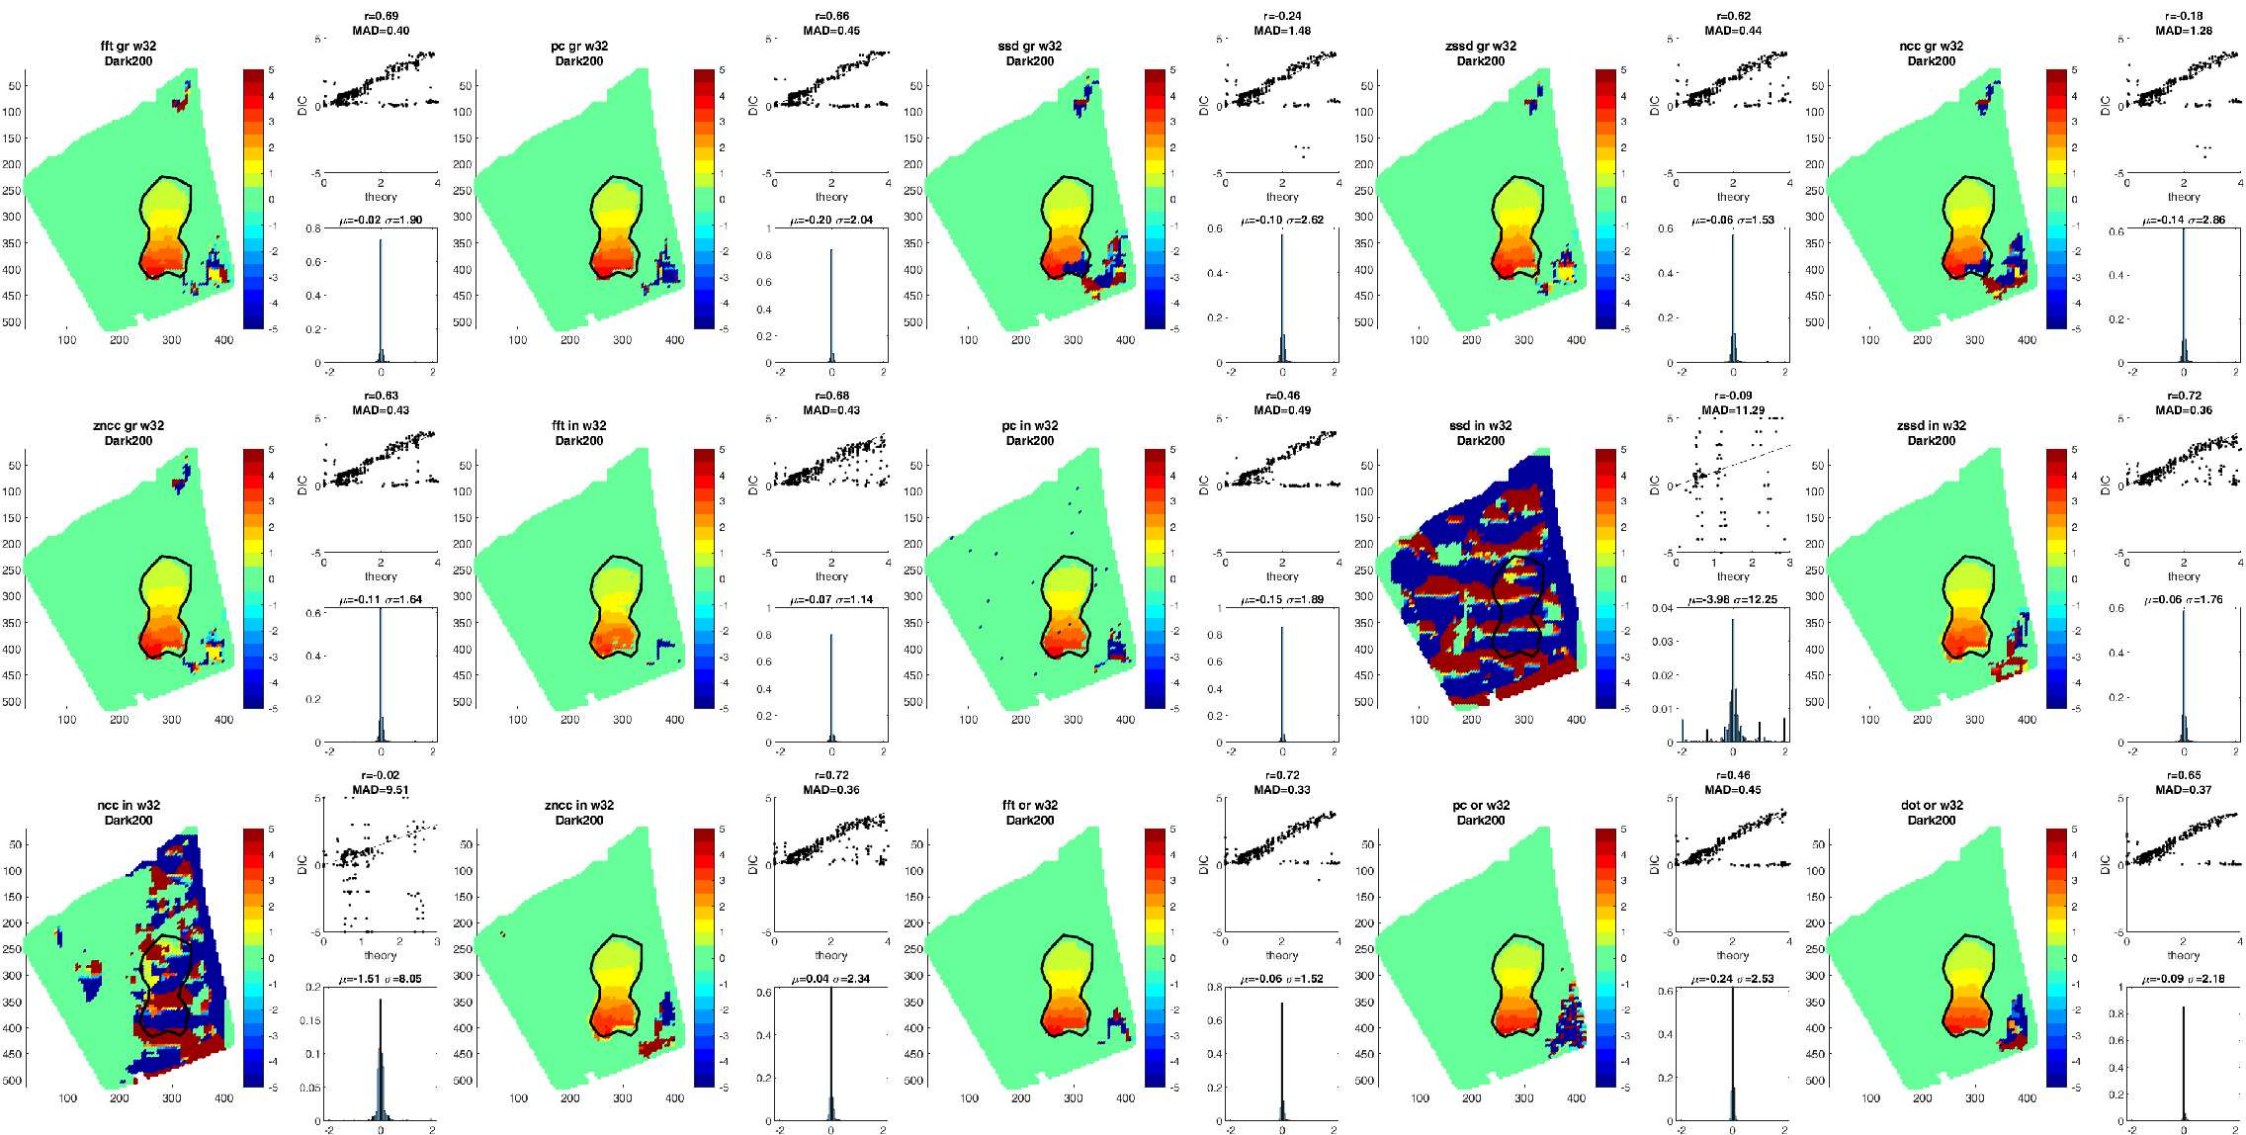



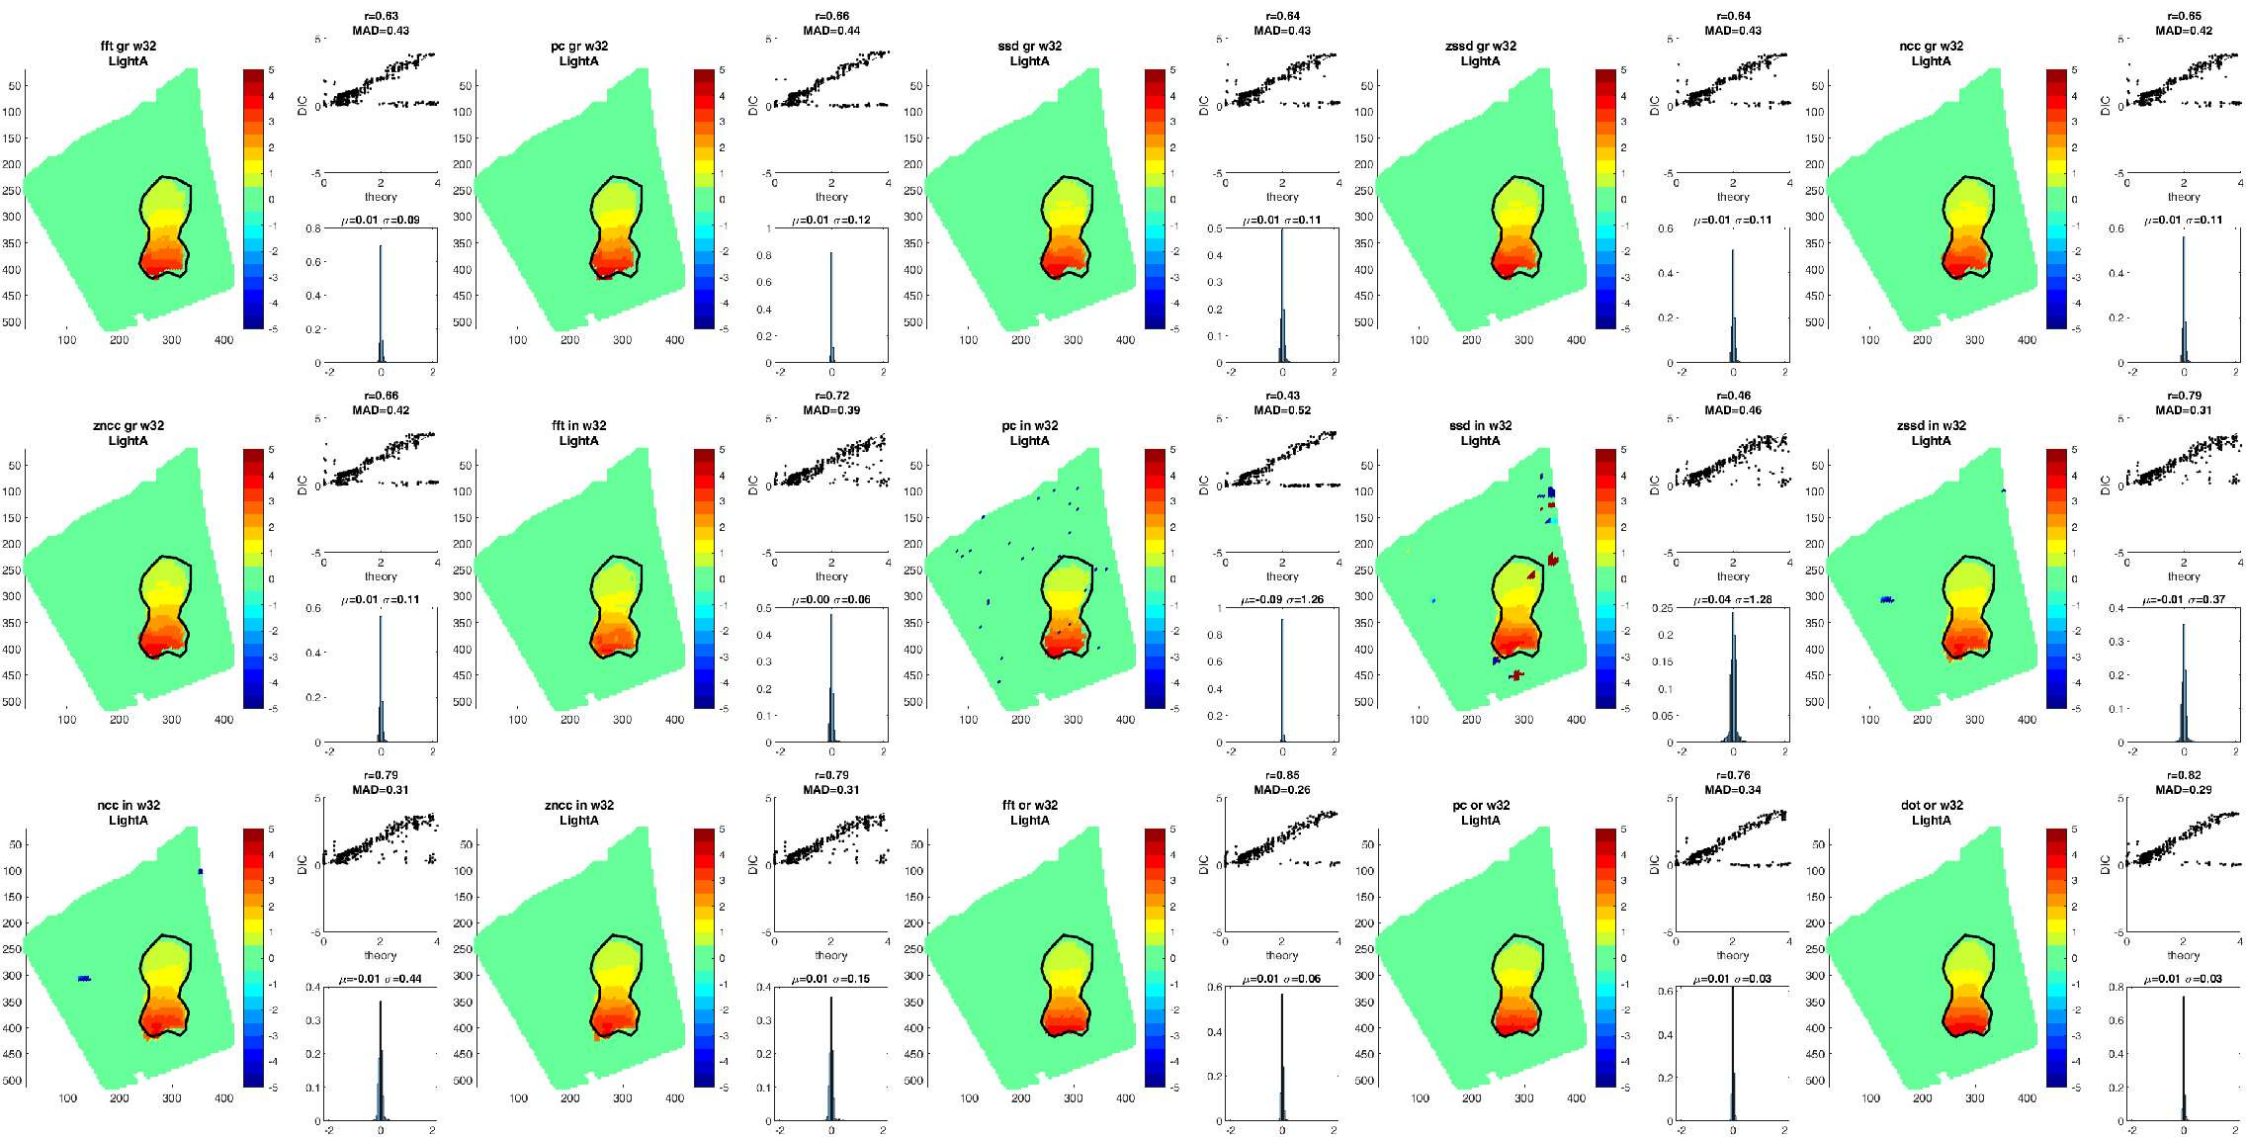

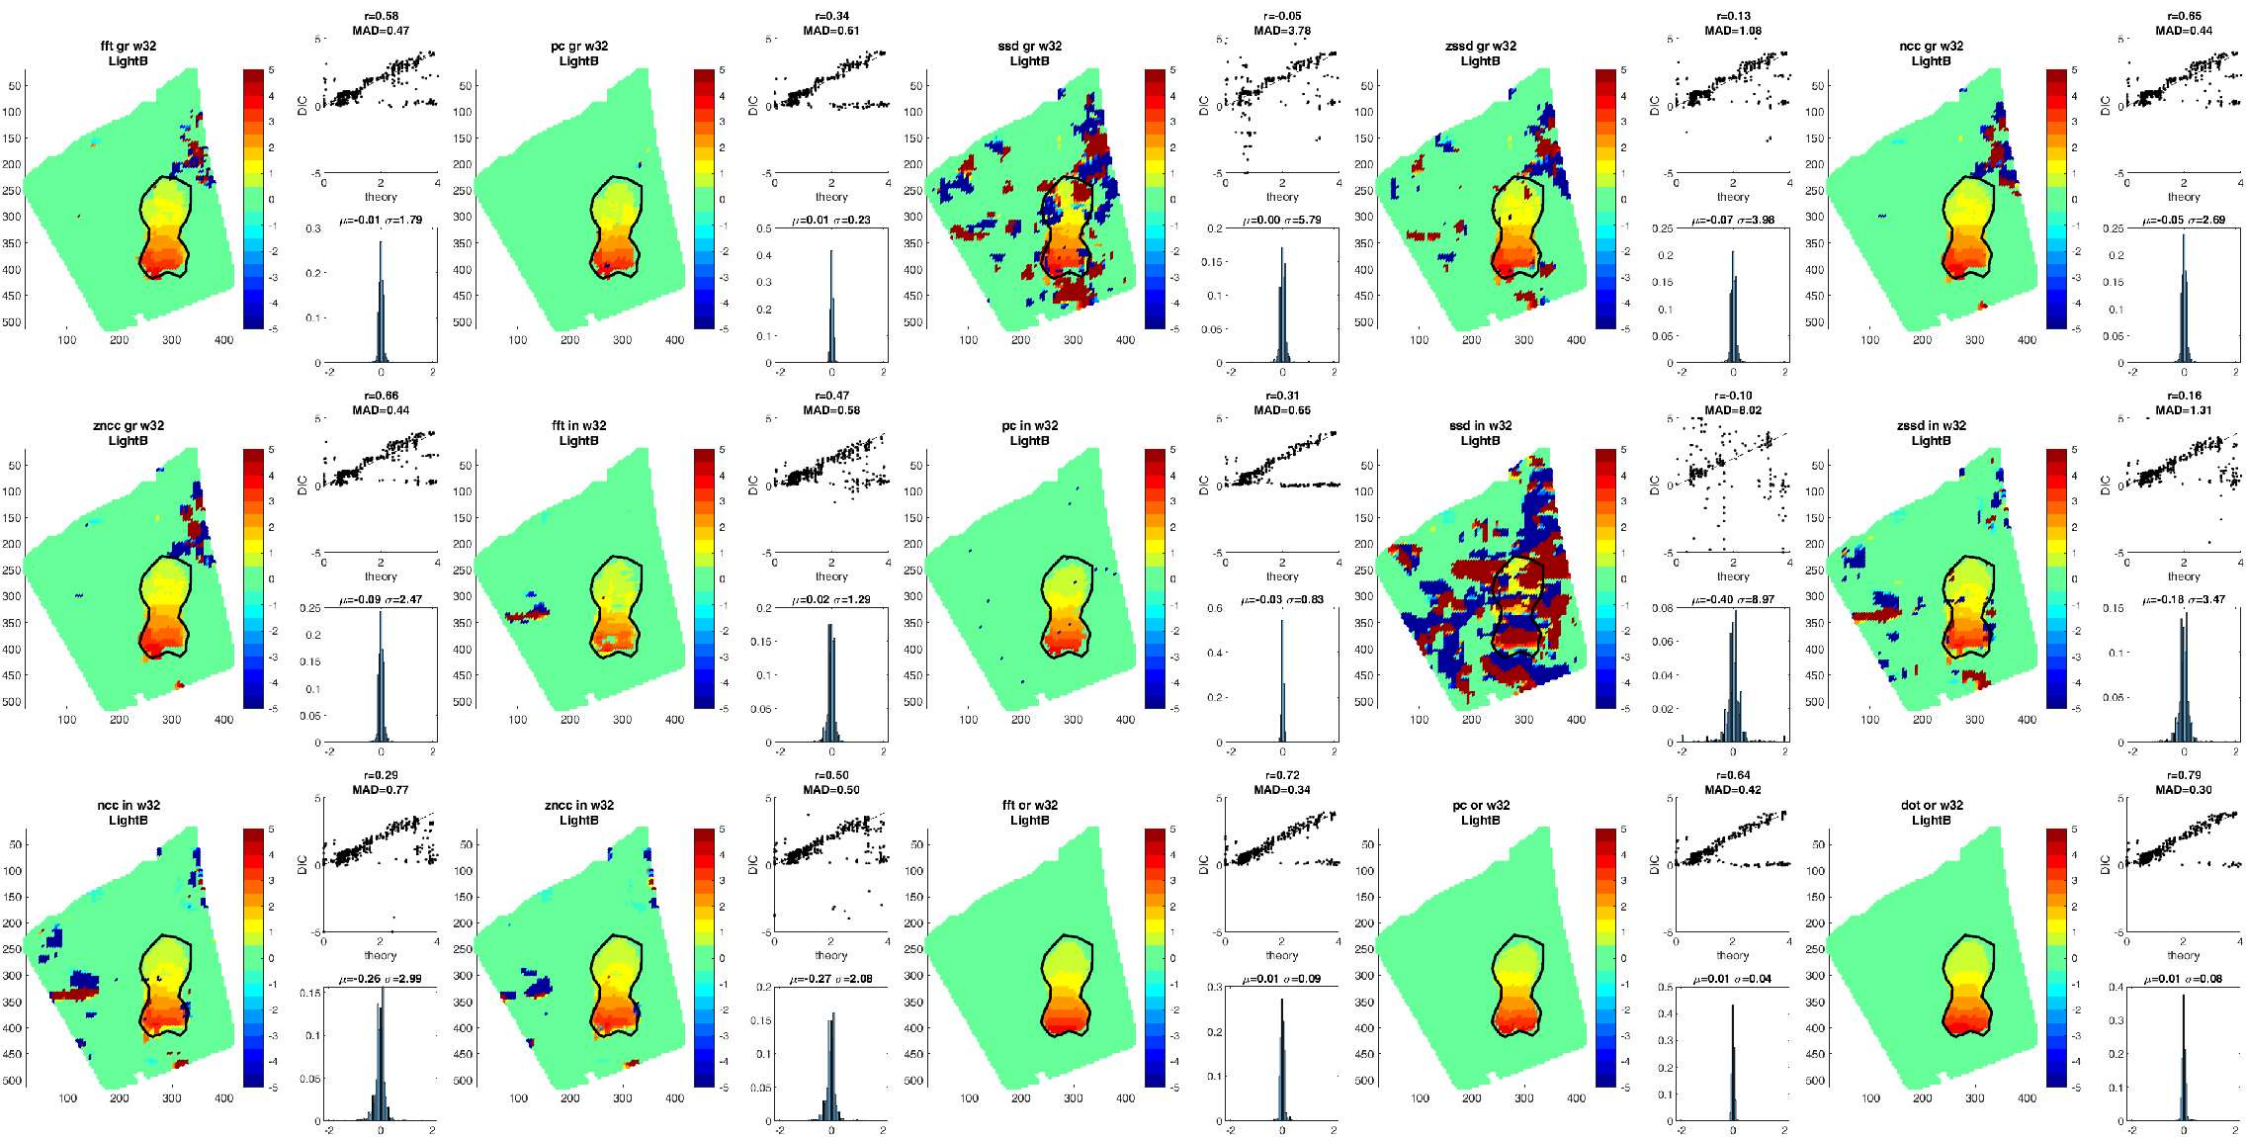



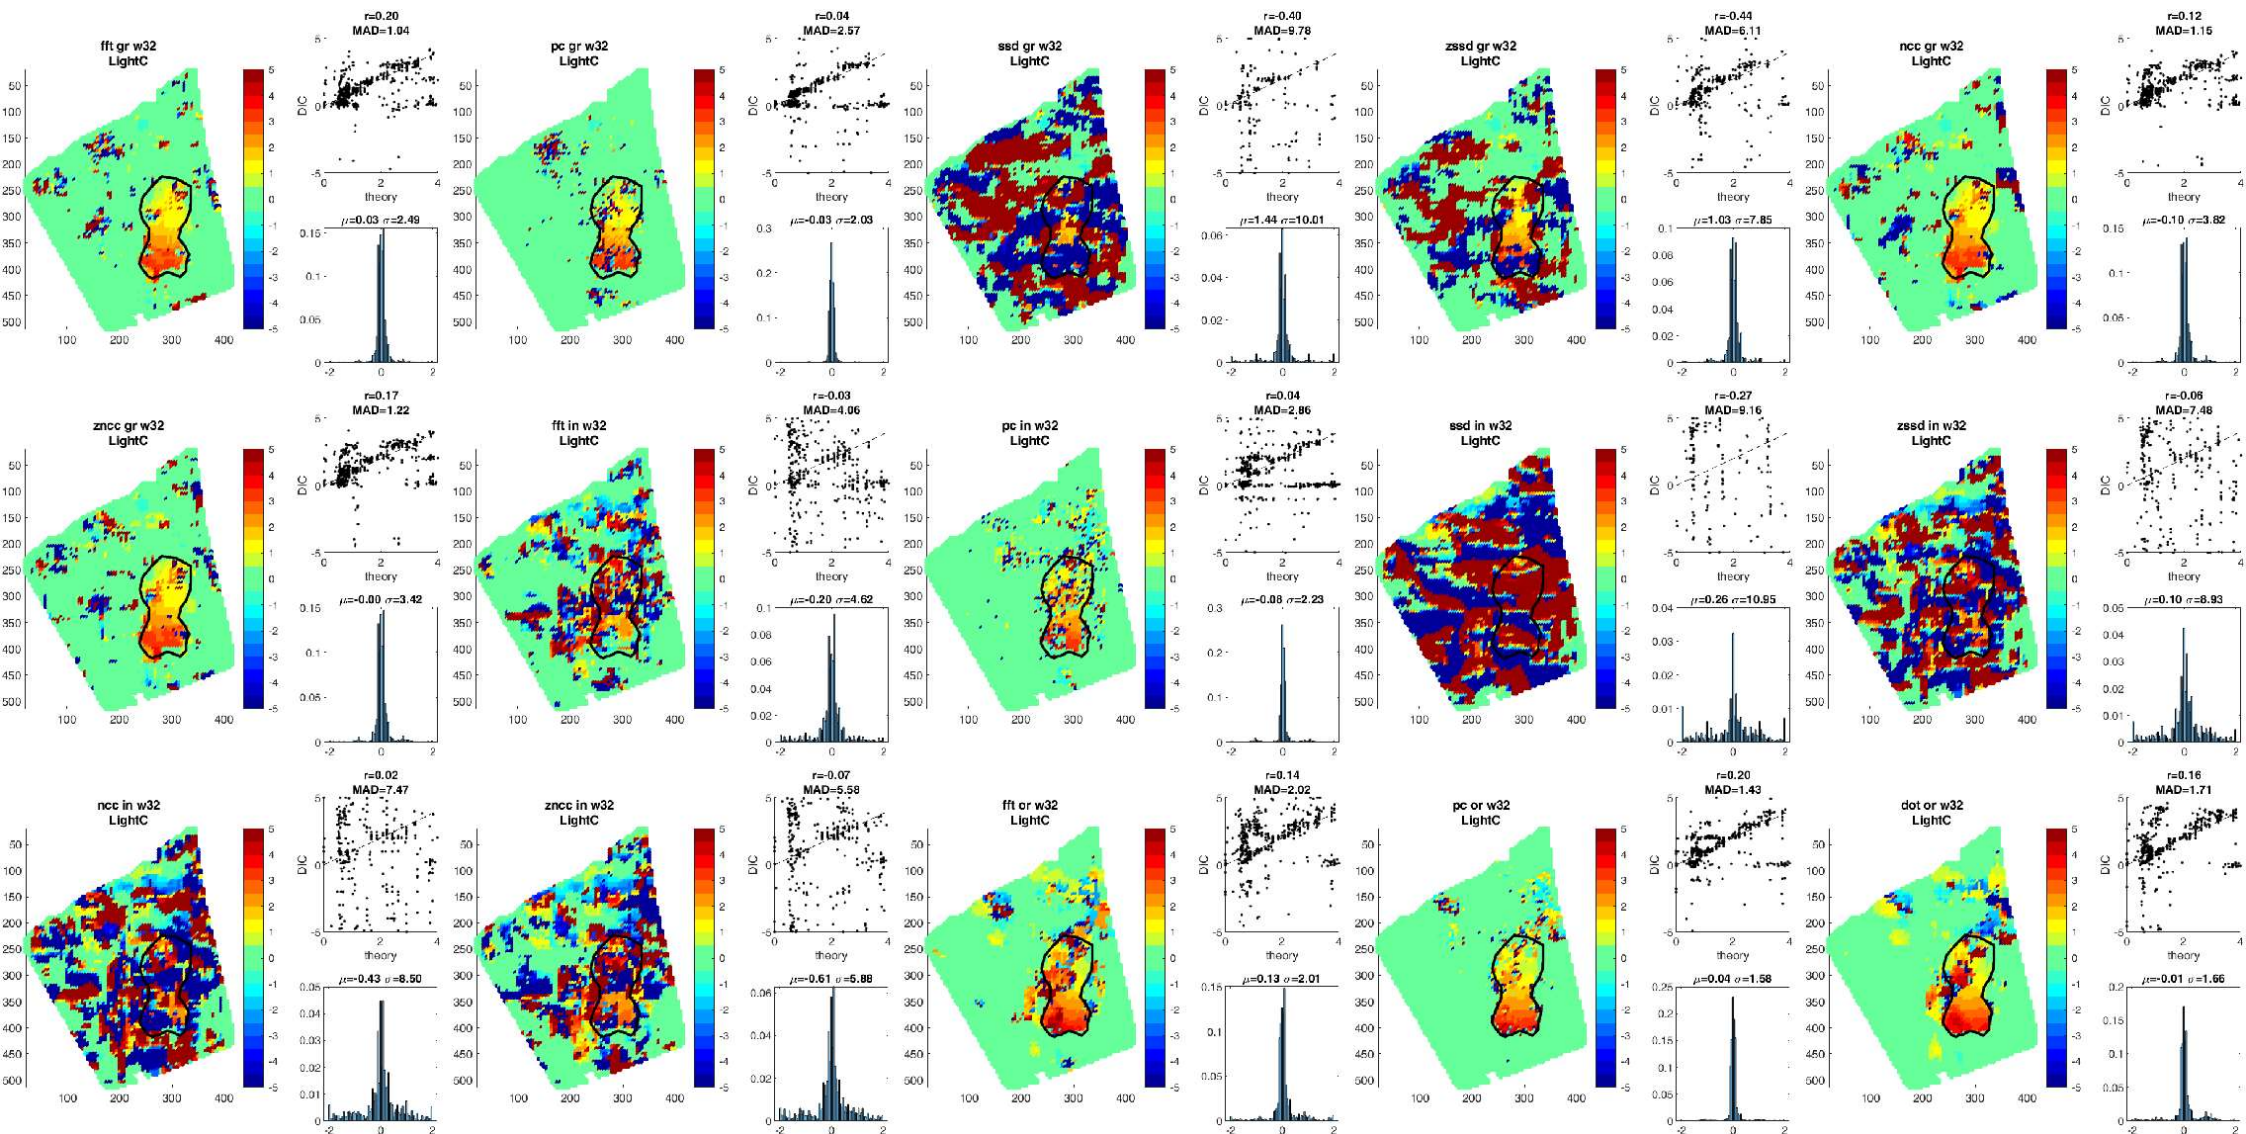

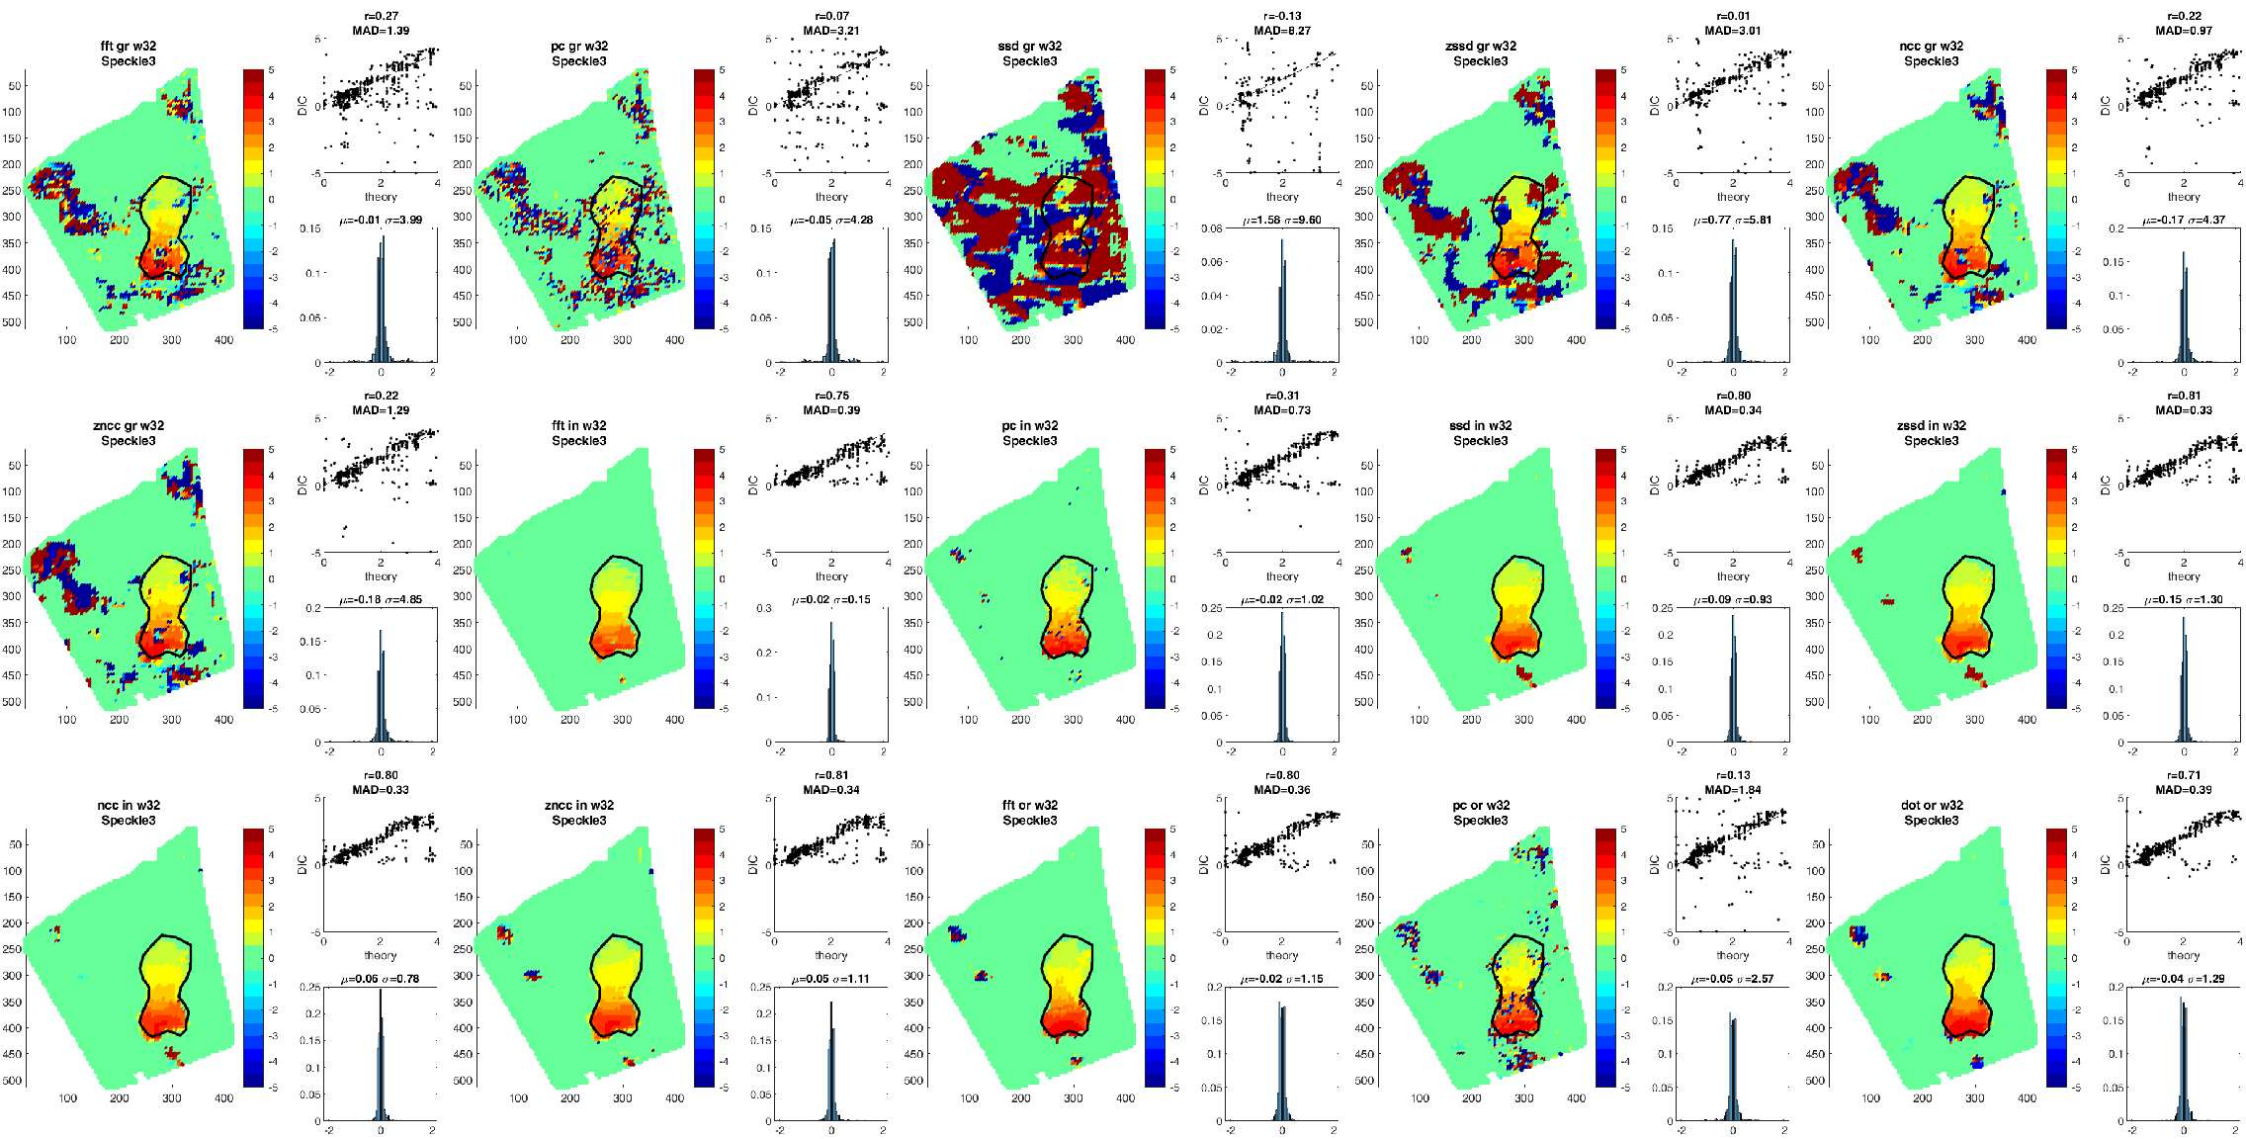



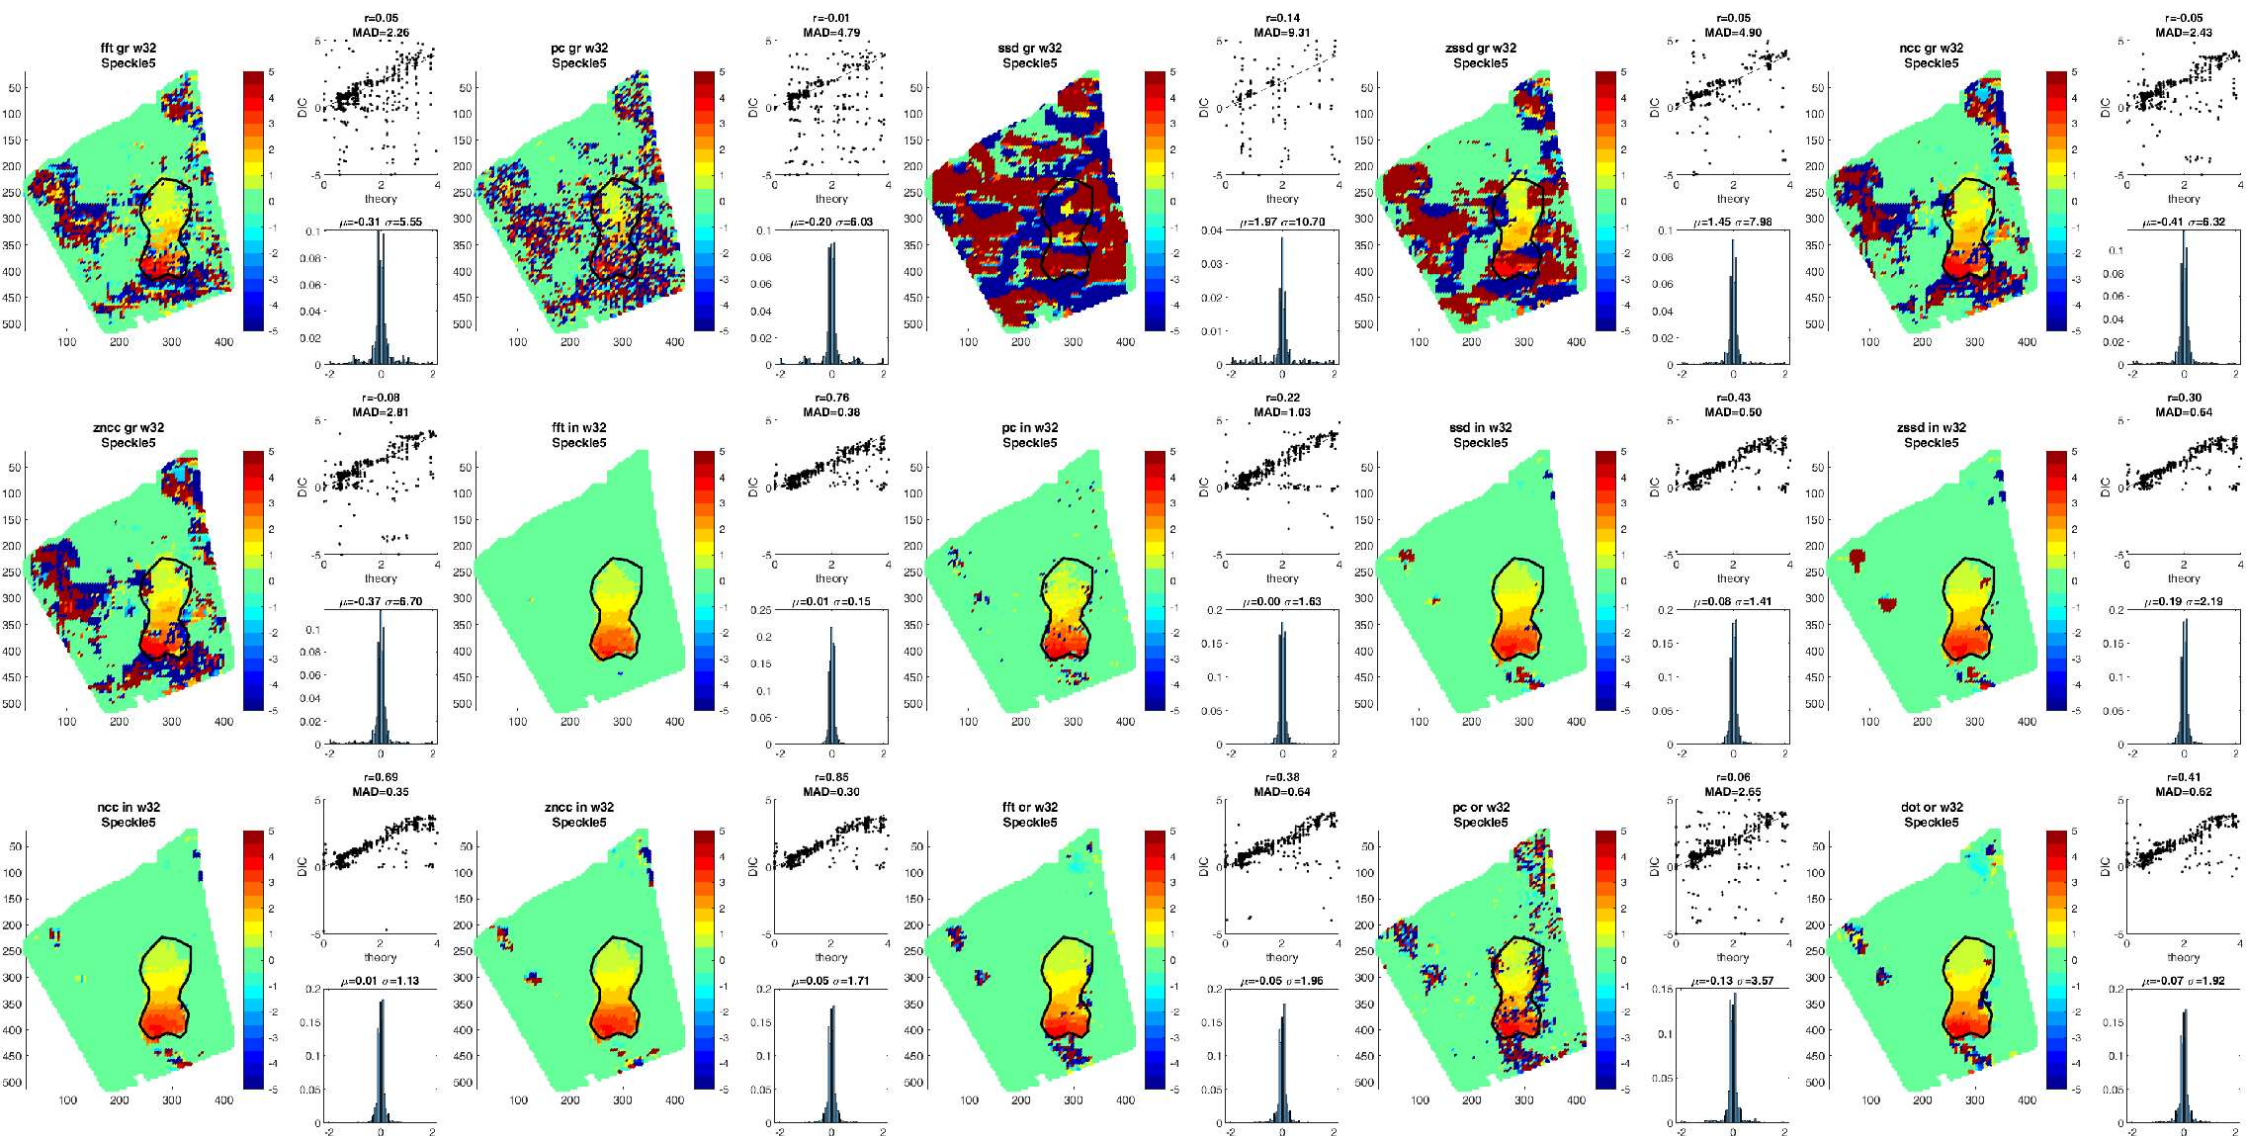

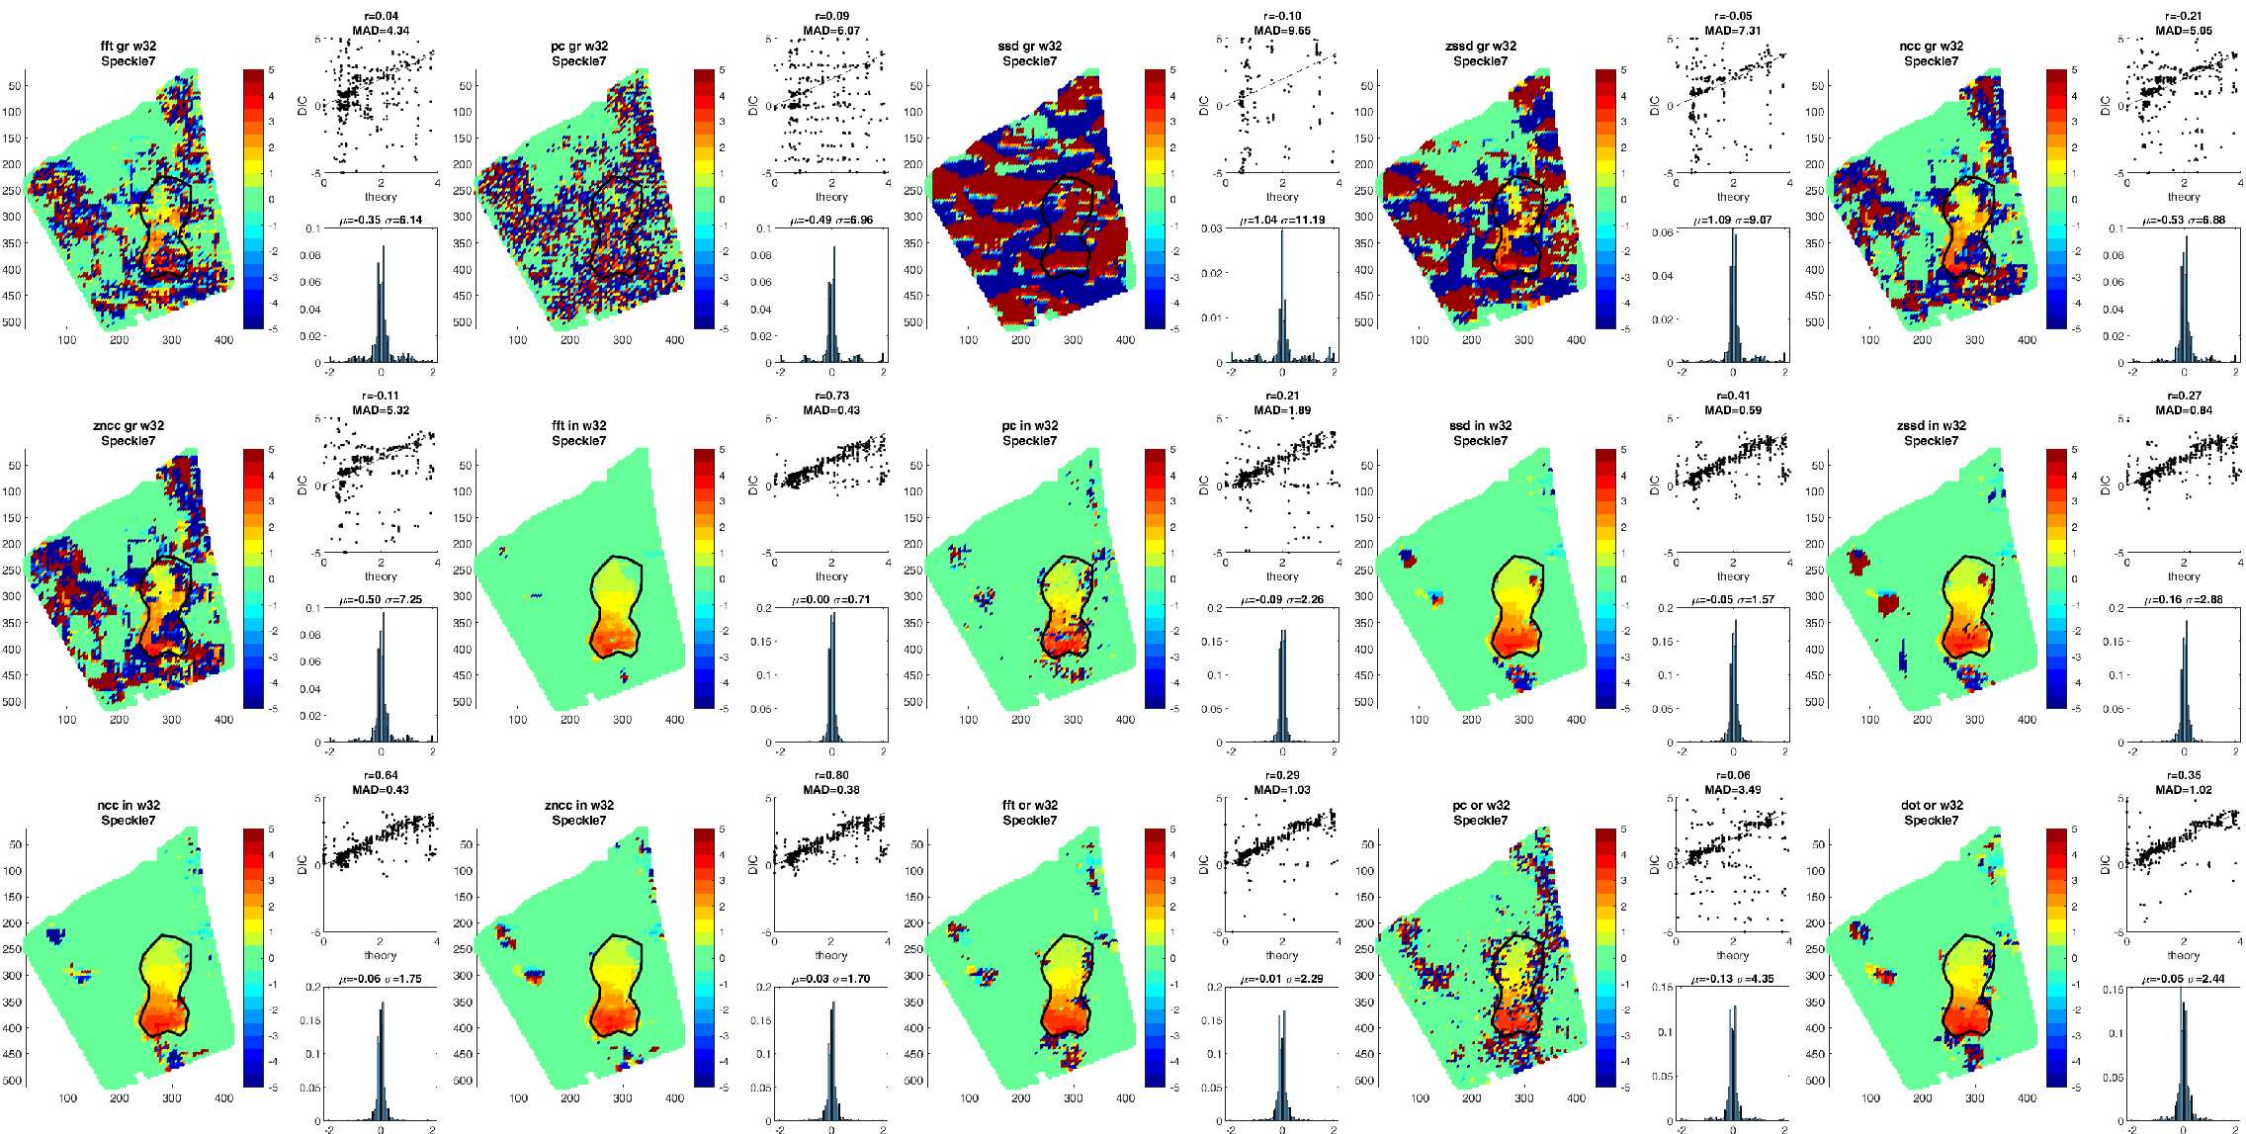



Template size 64x64

# motlm

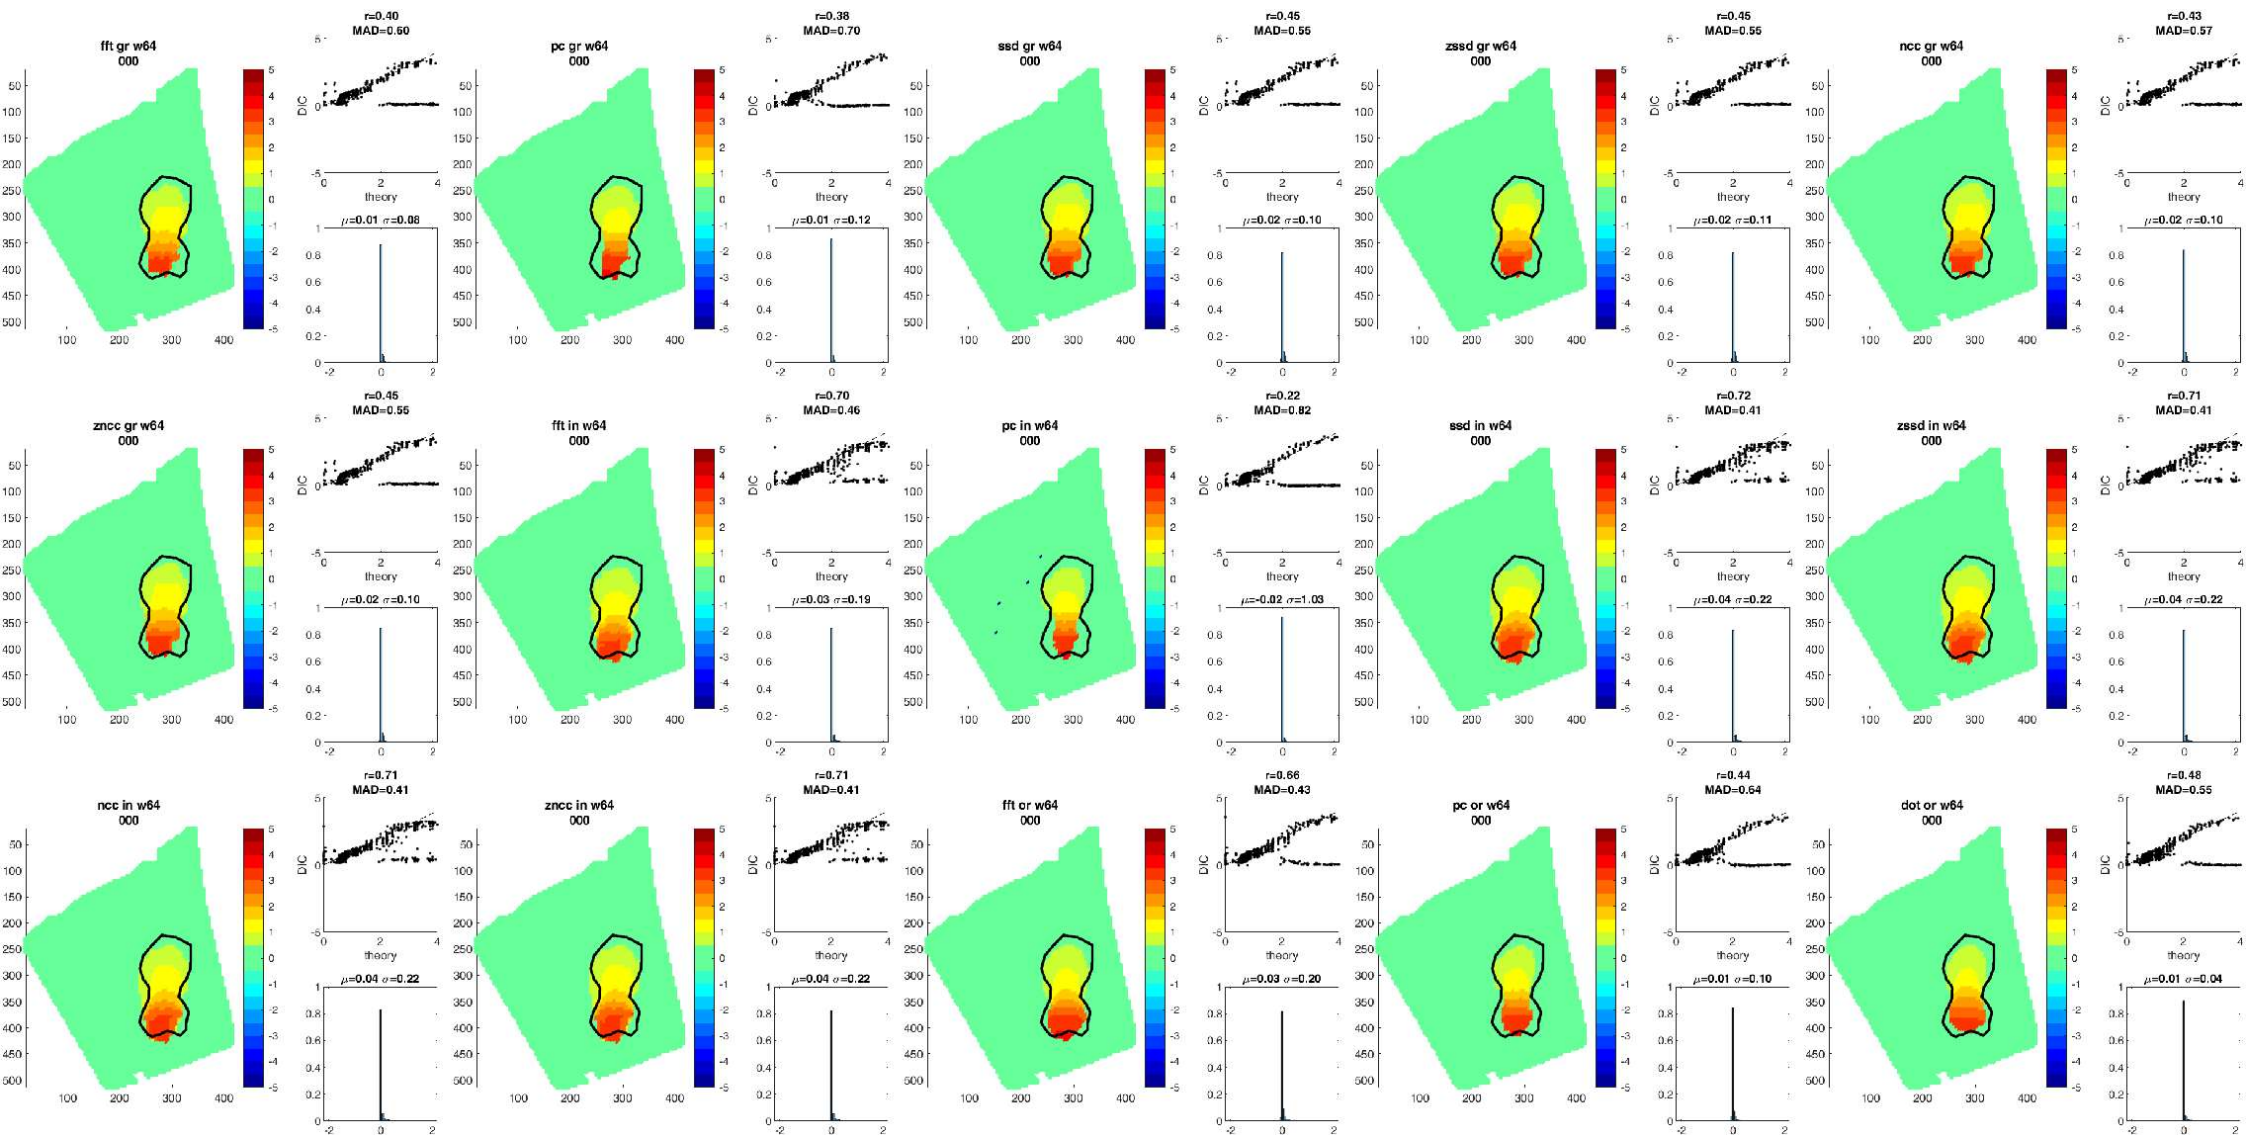



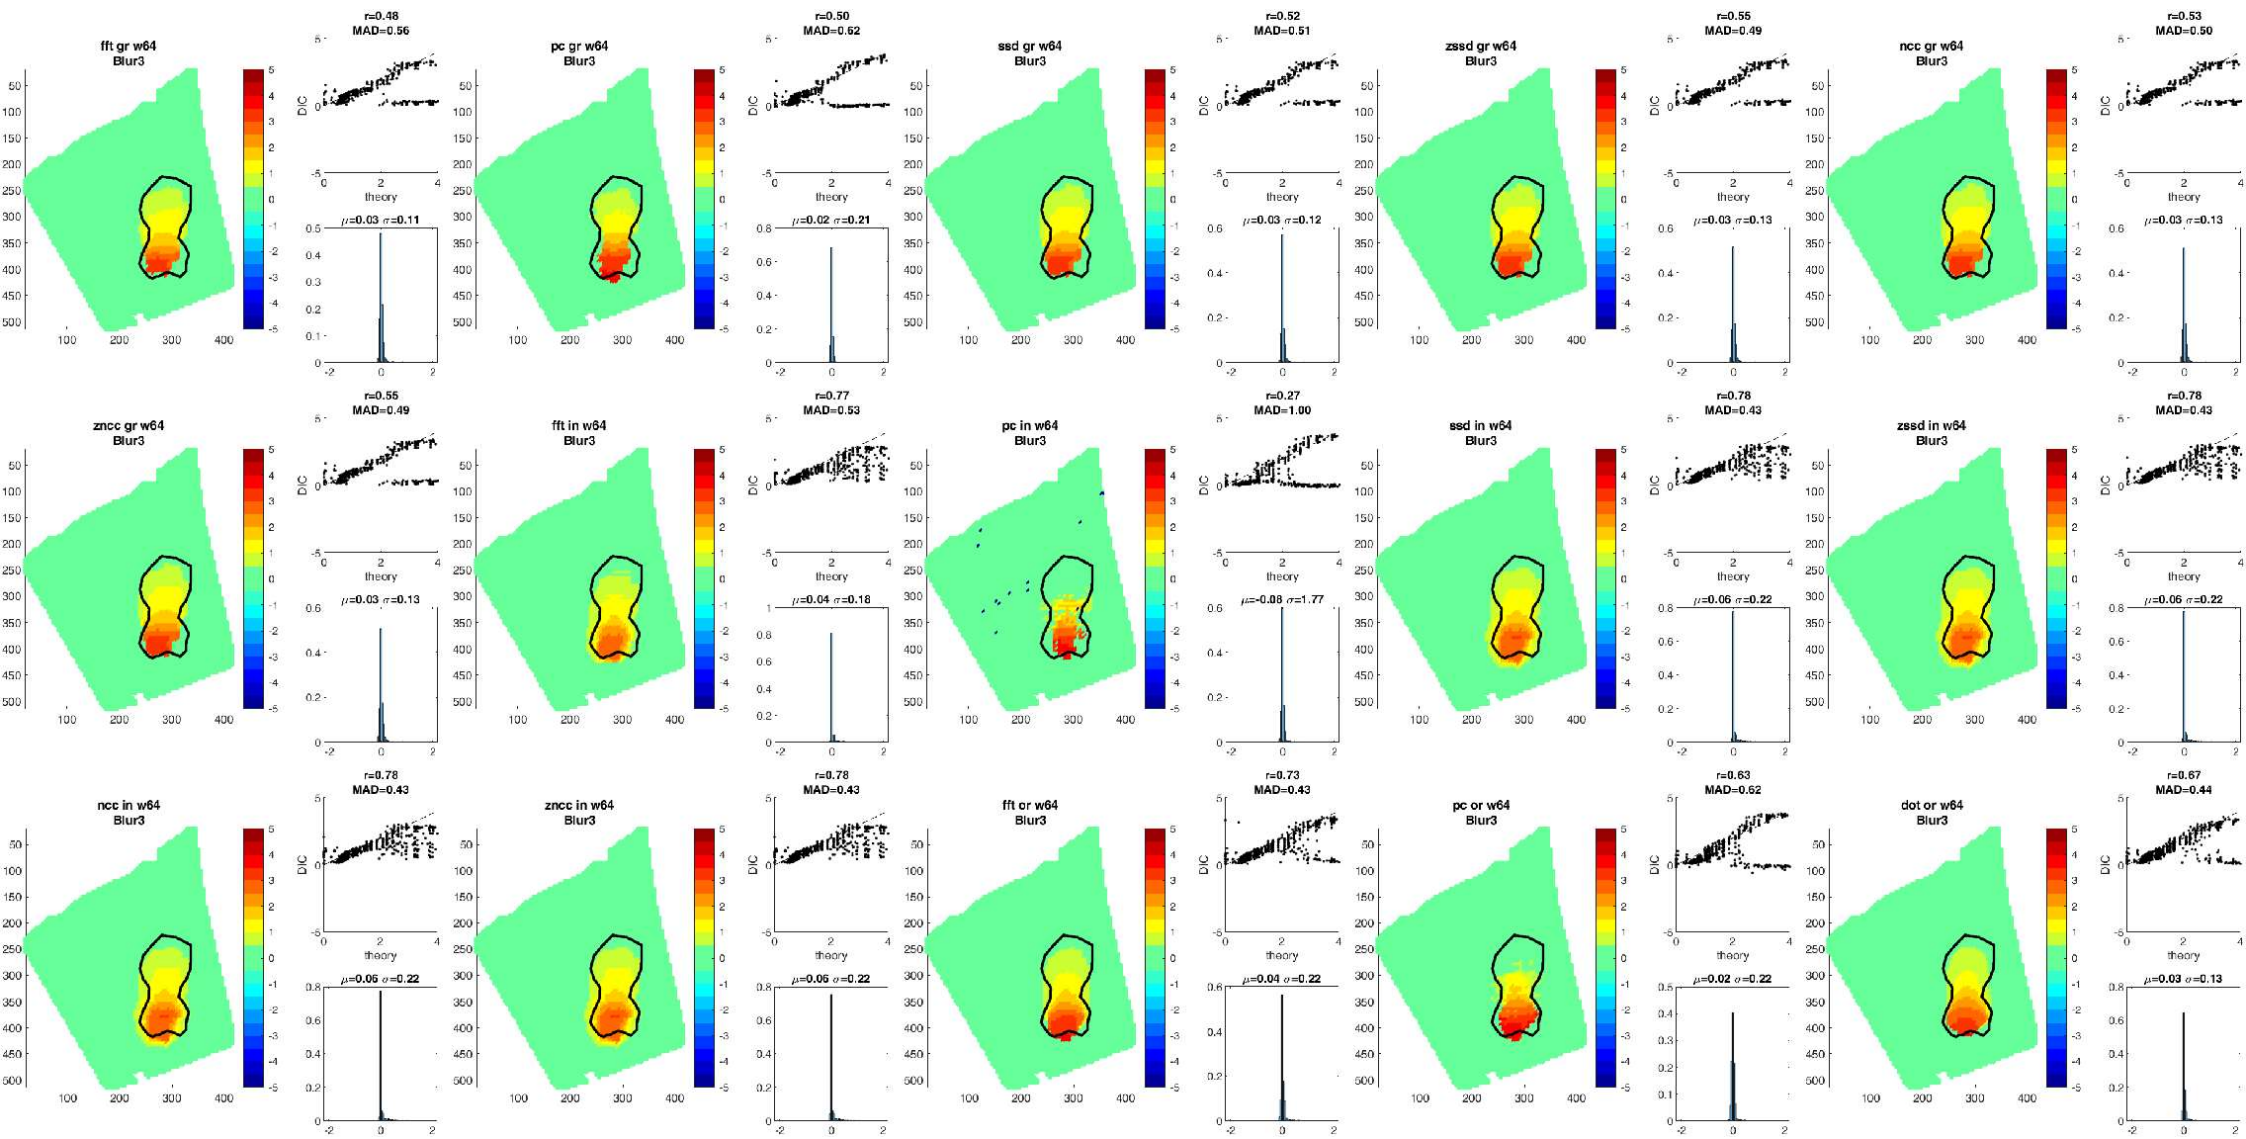

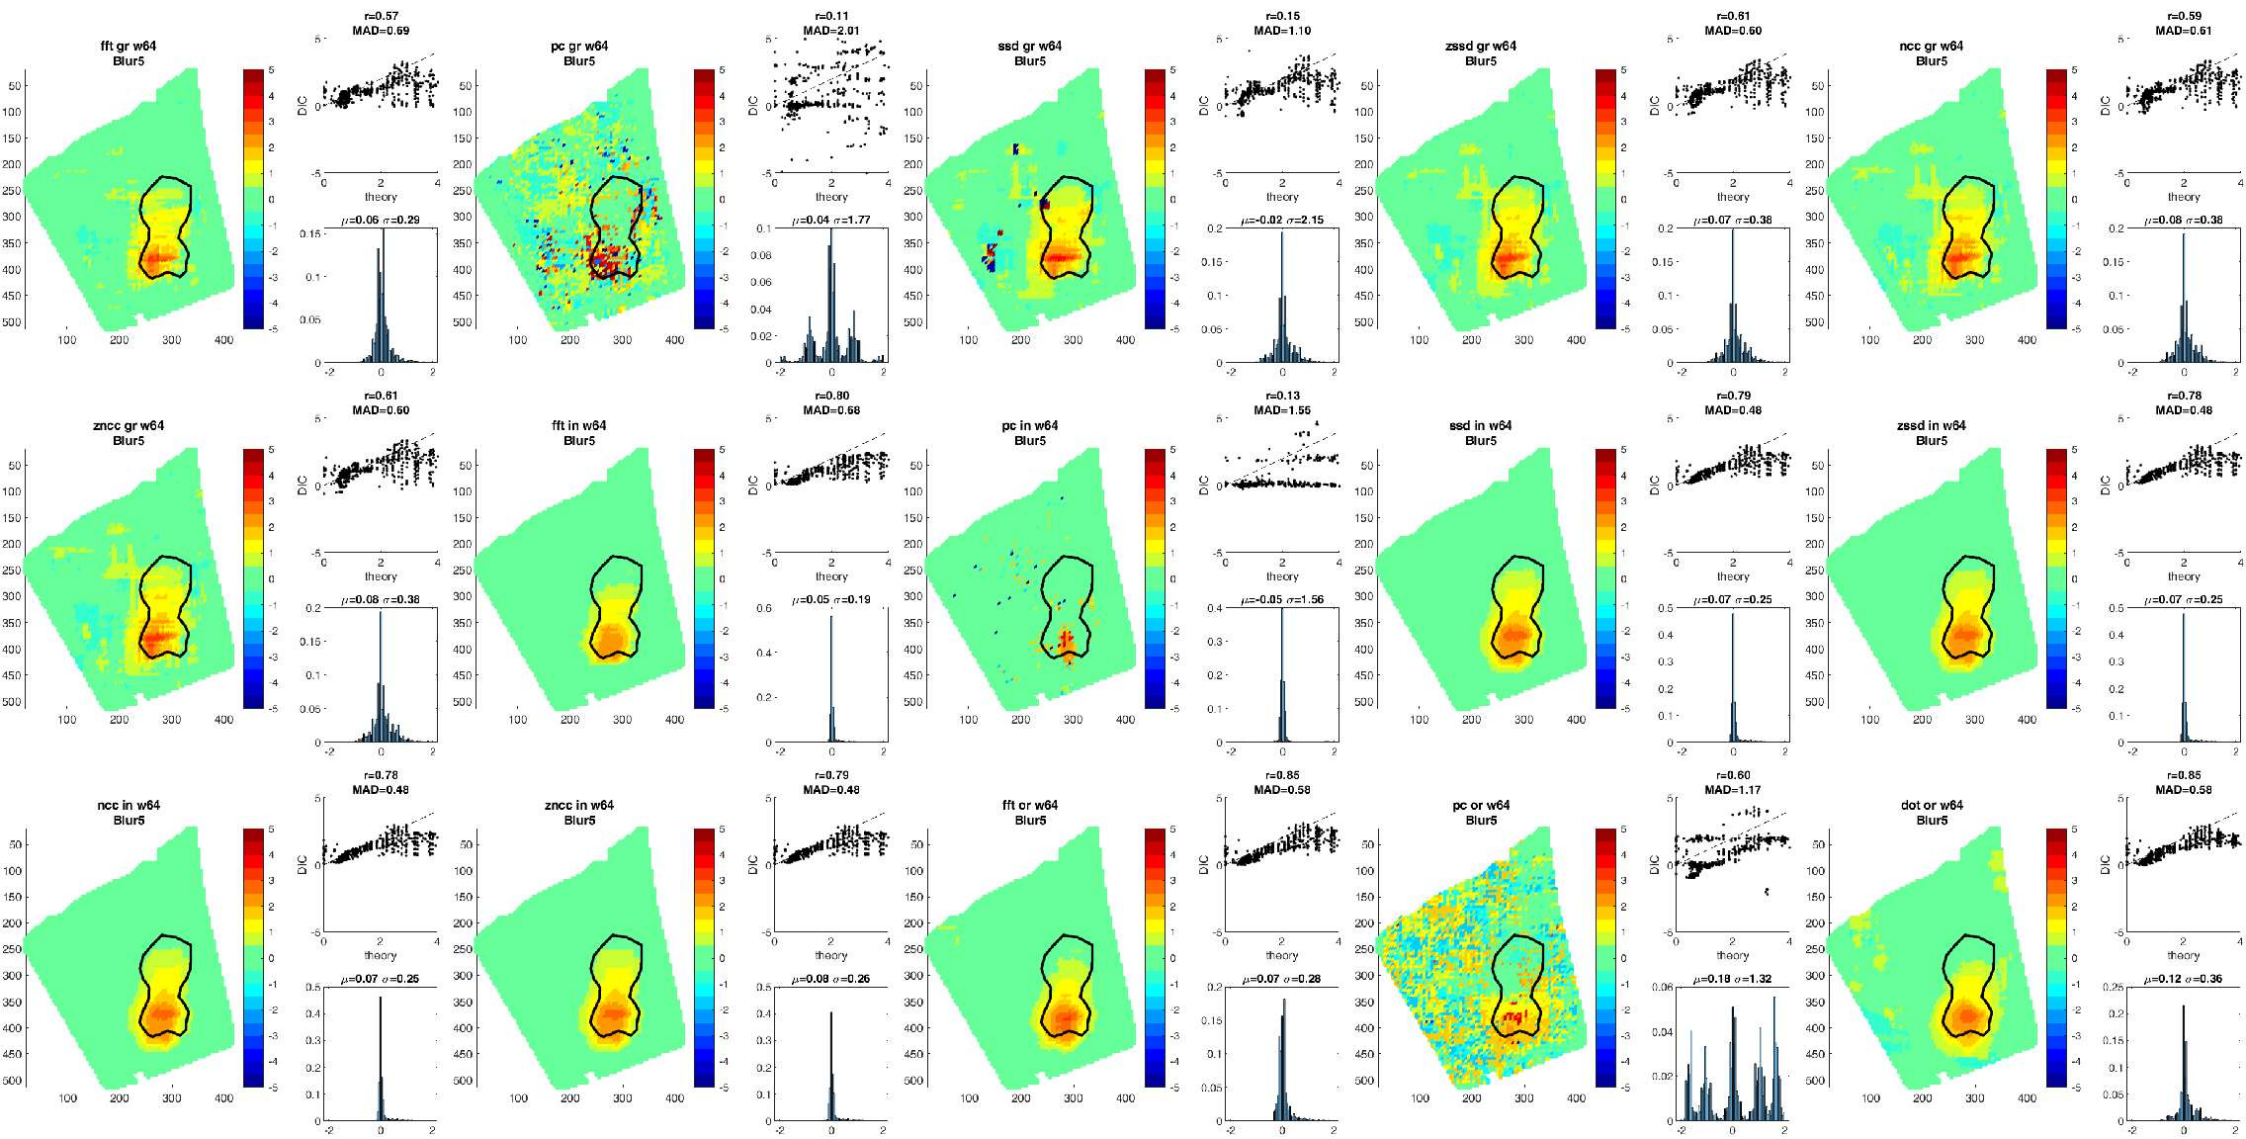



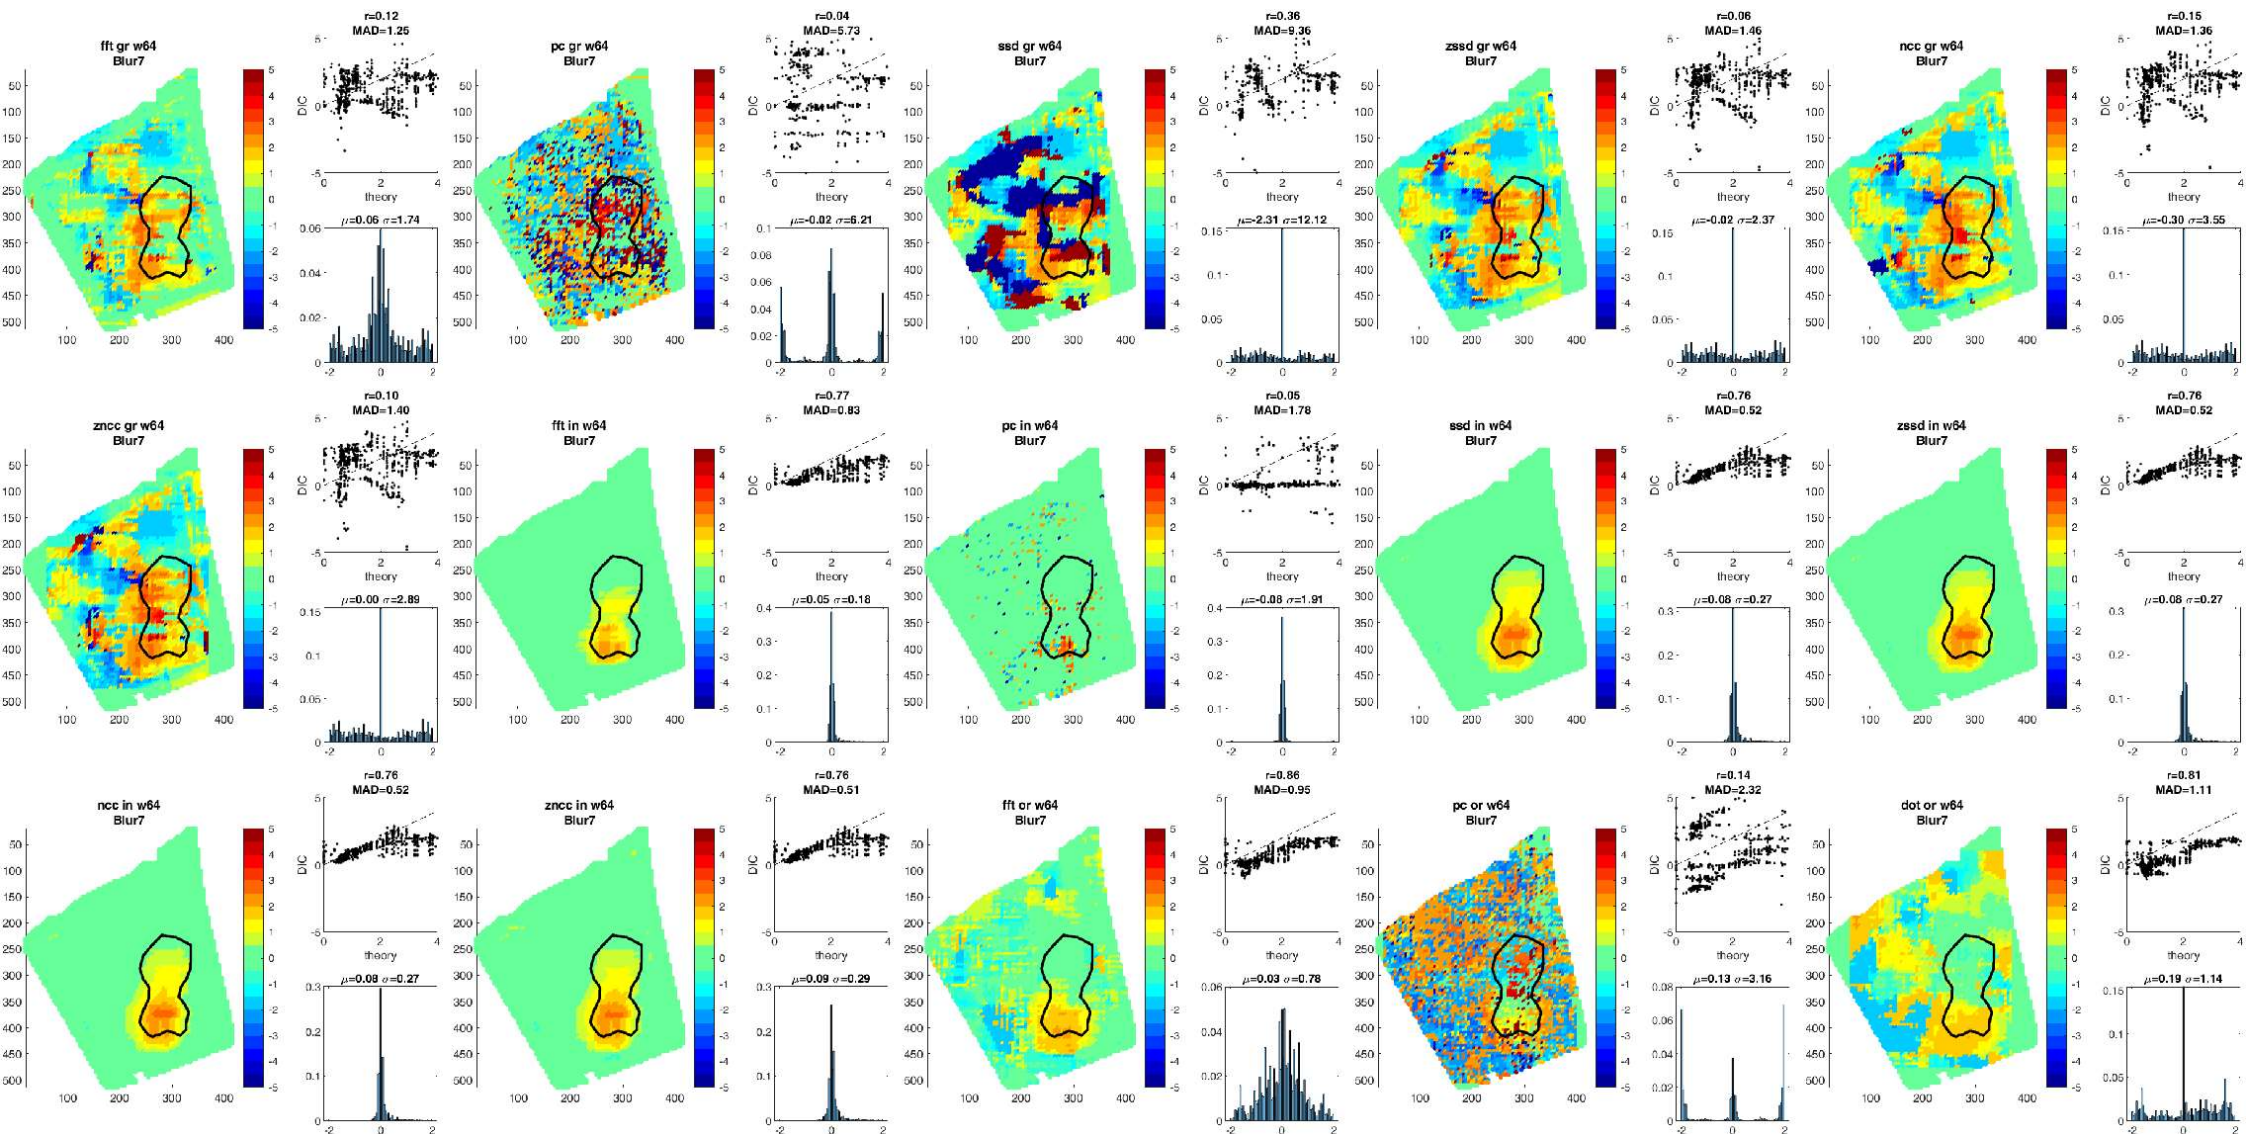

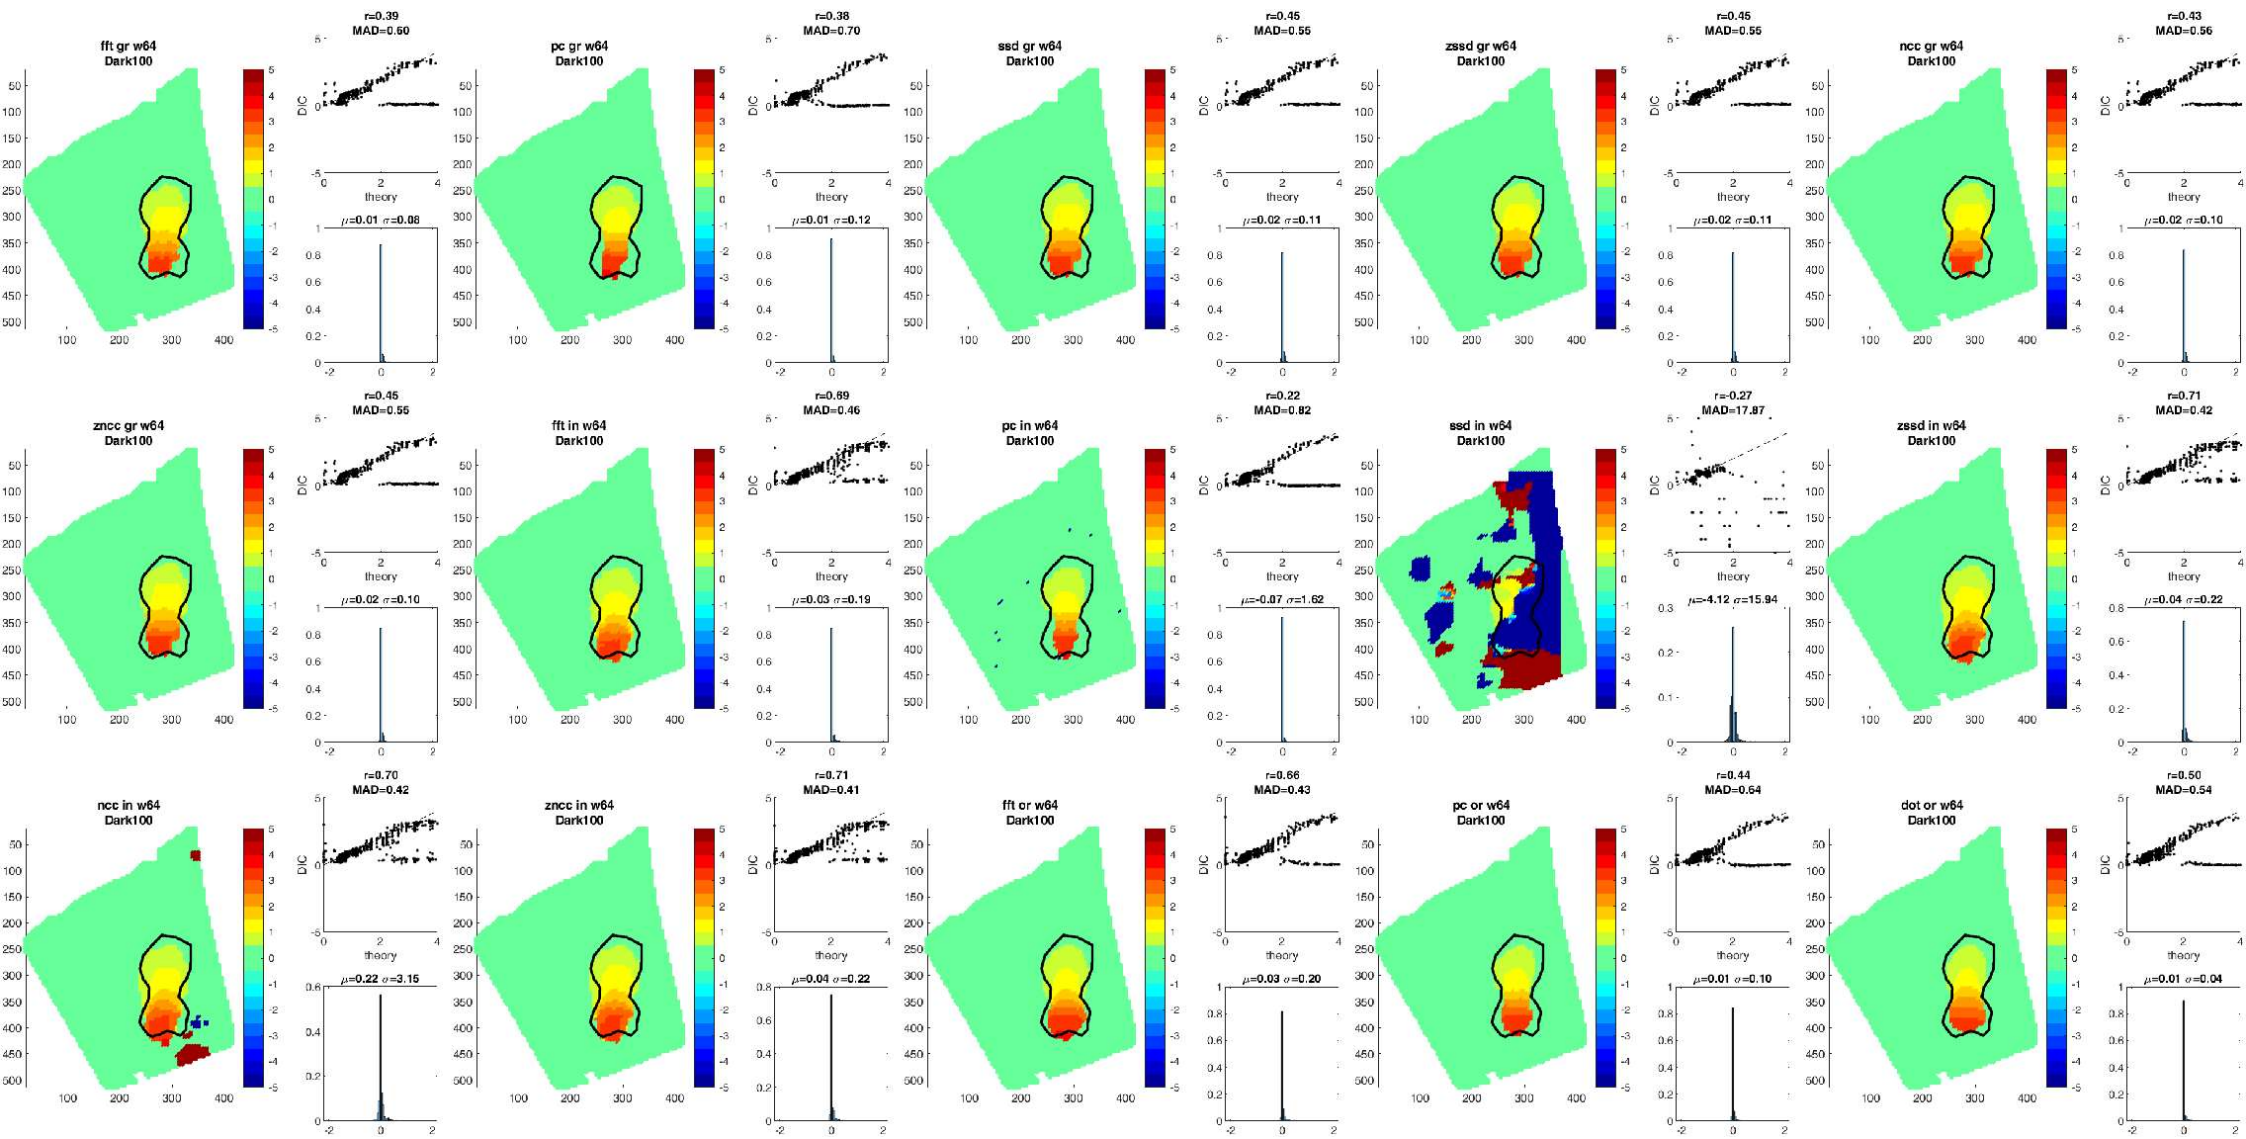



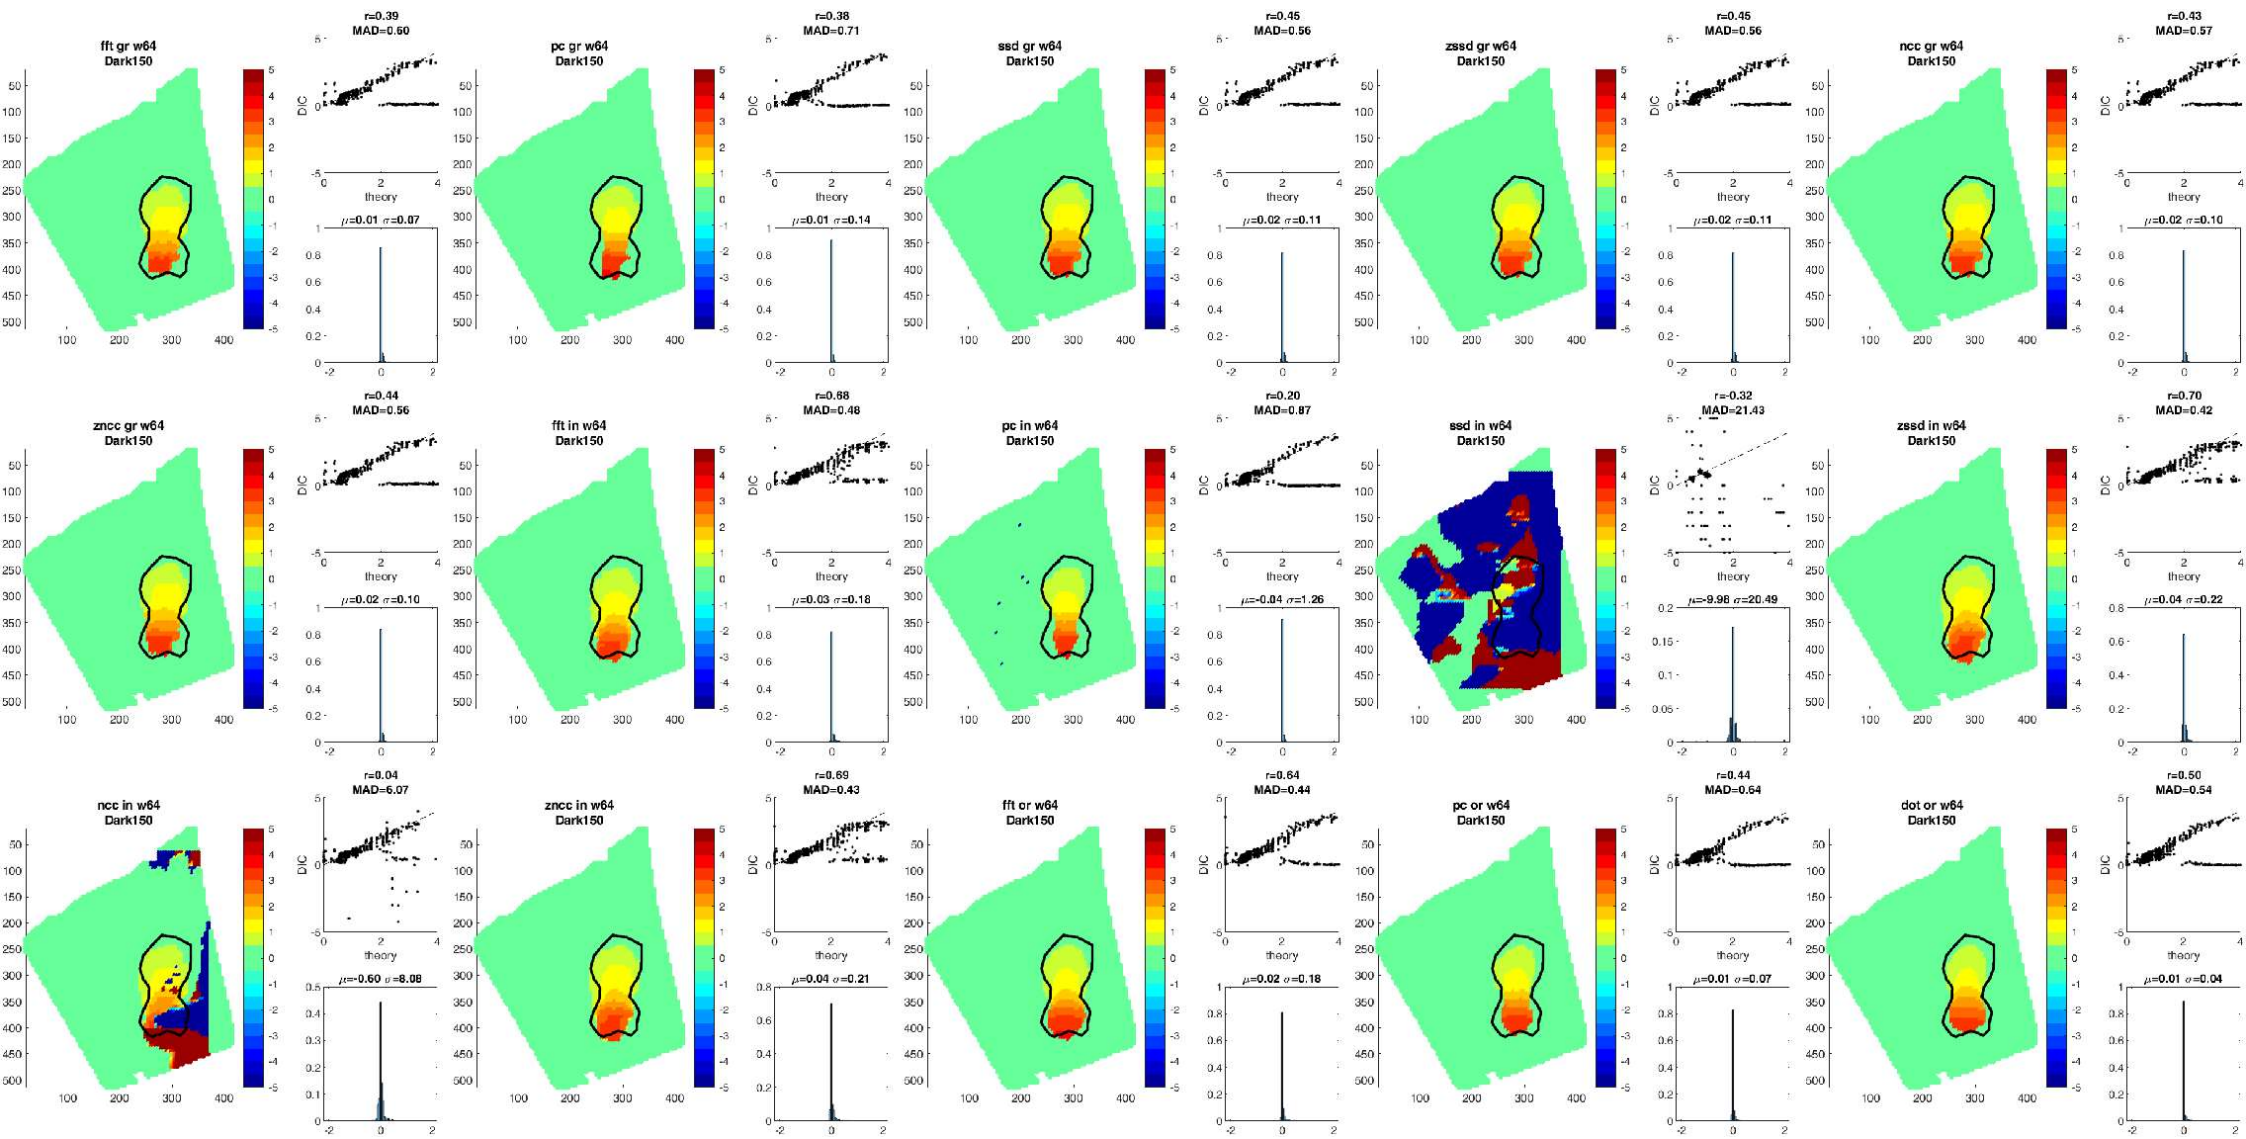

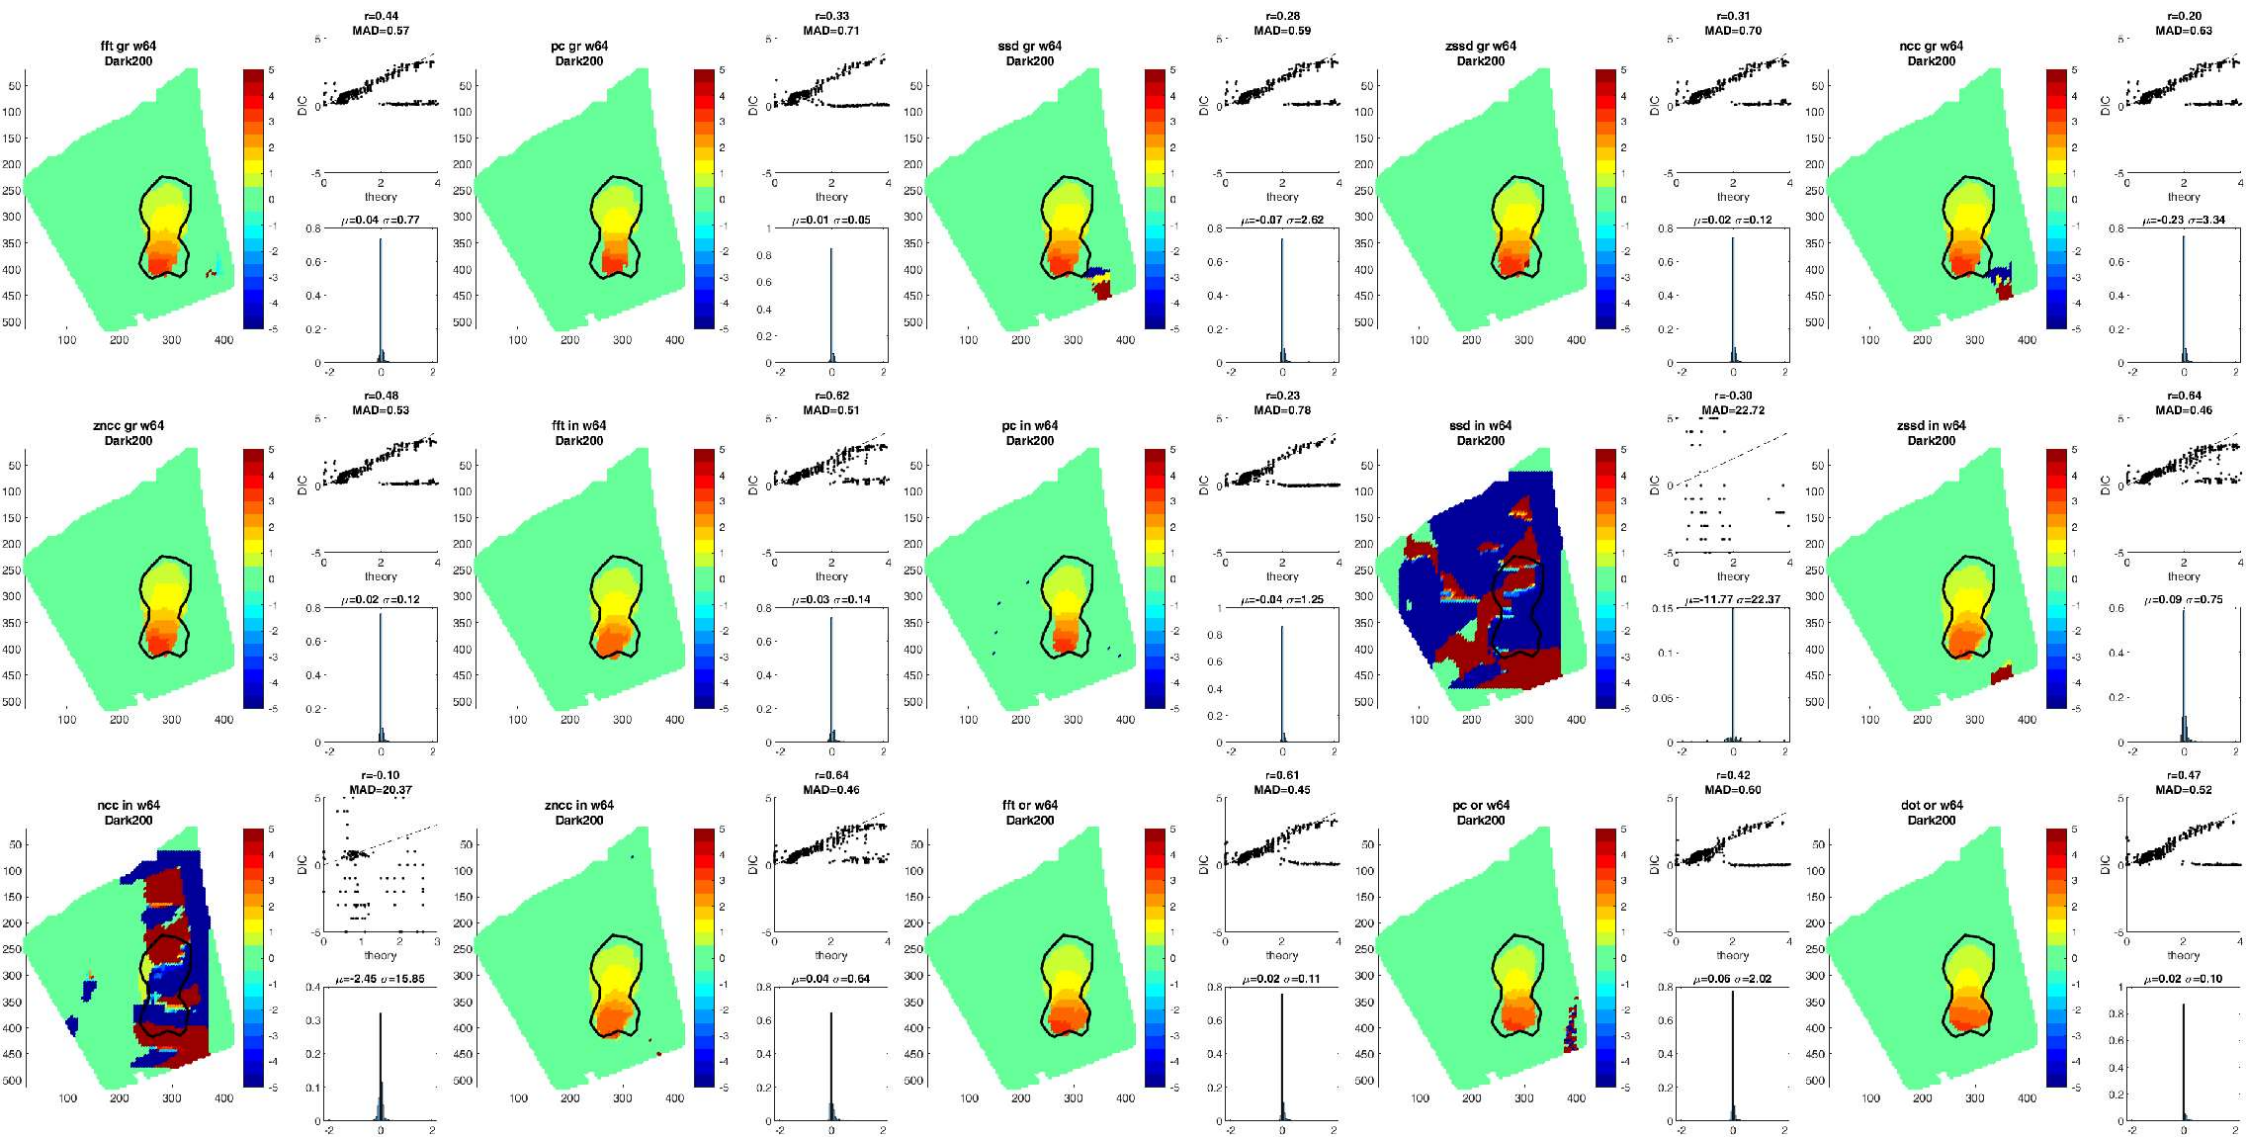



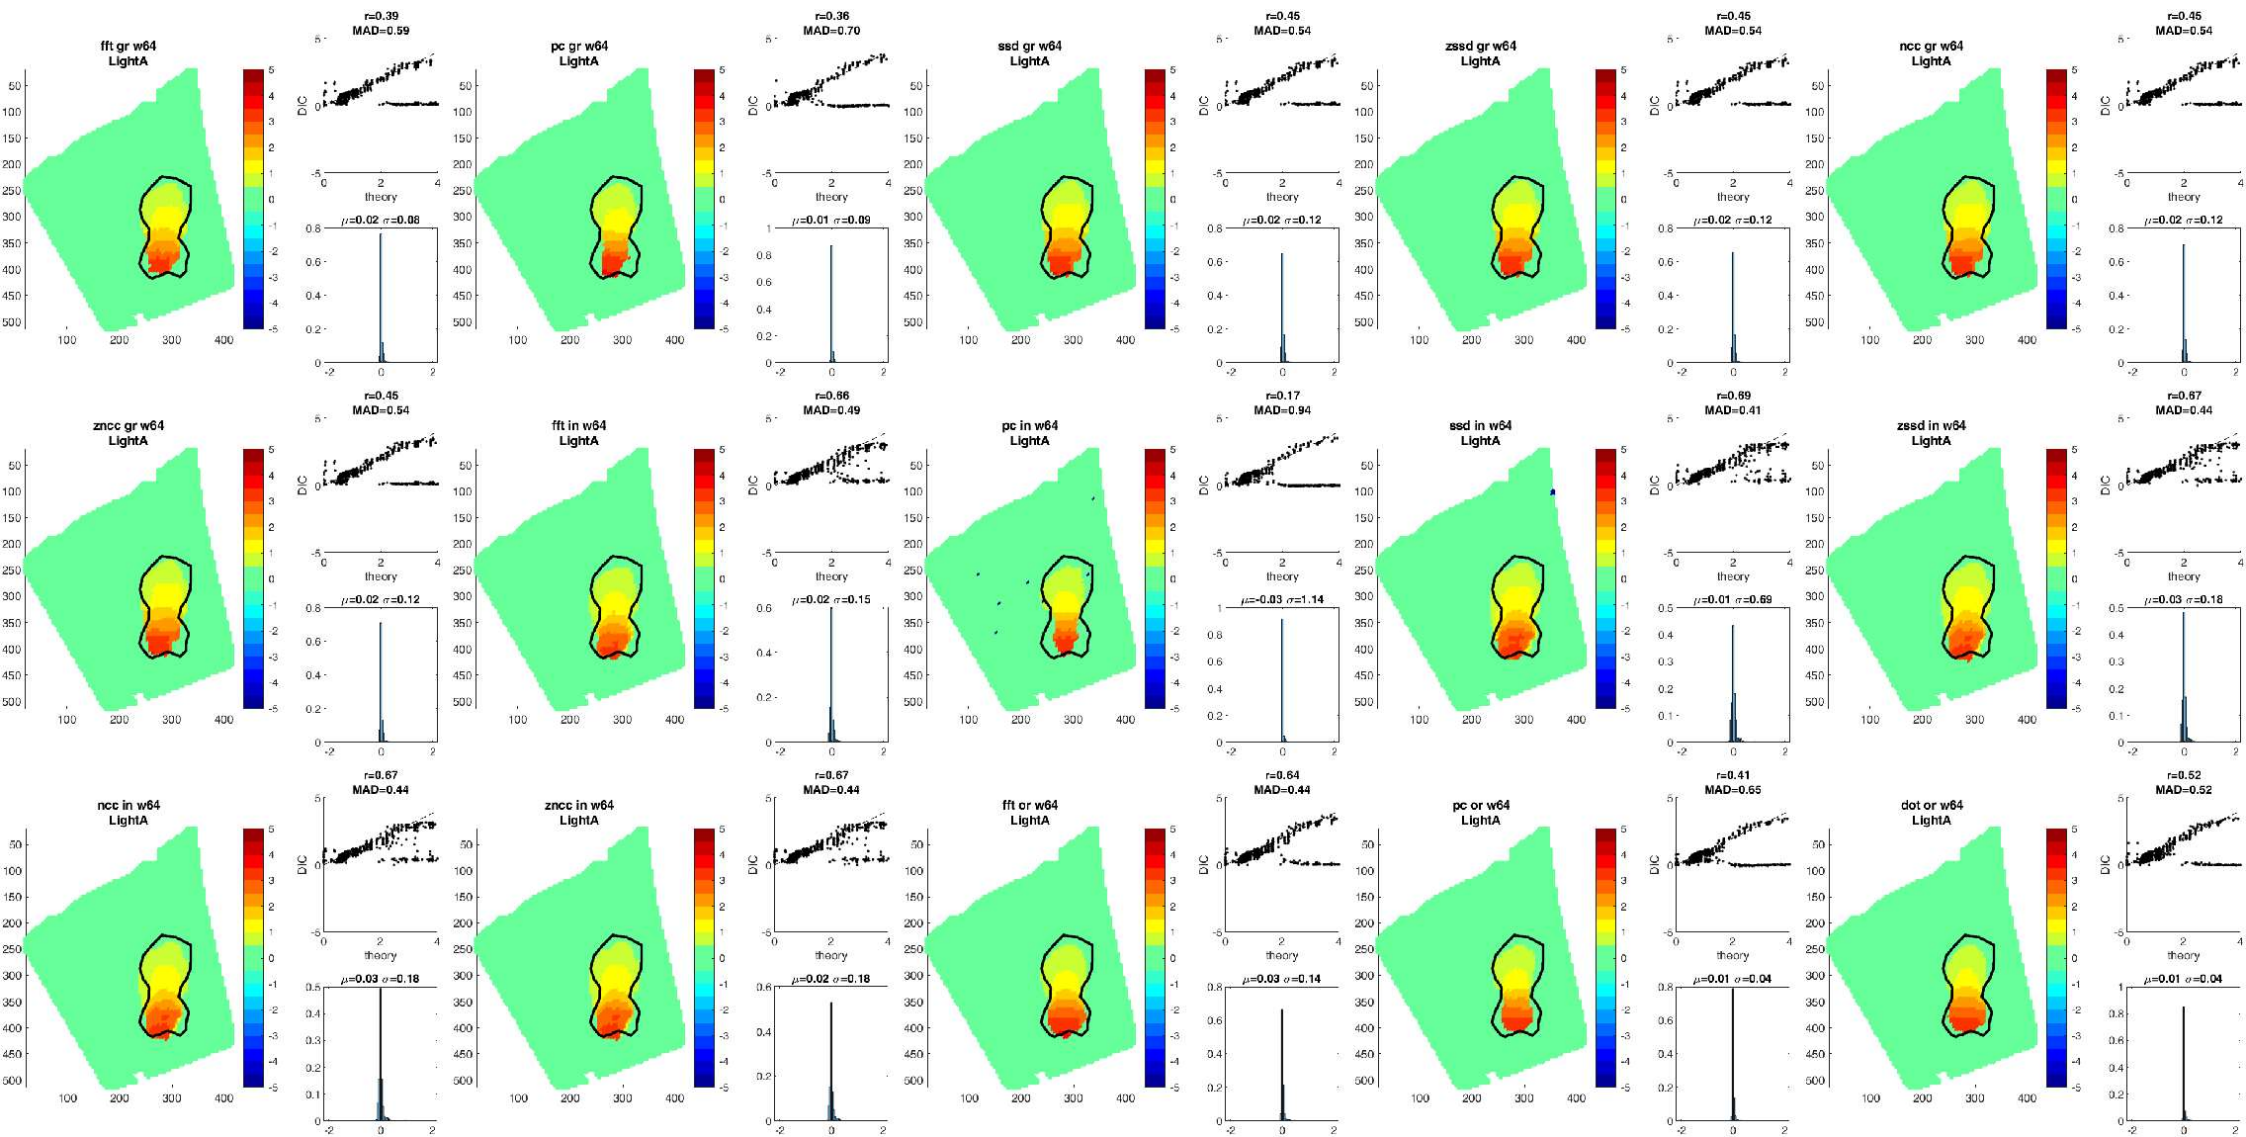

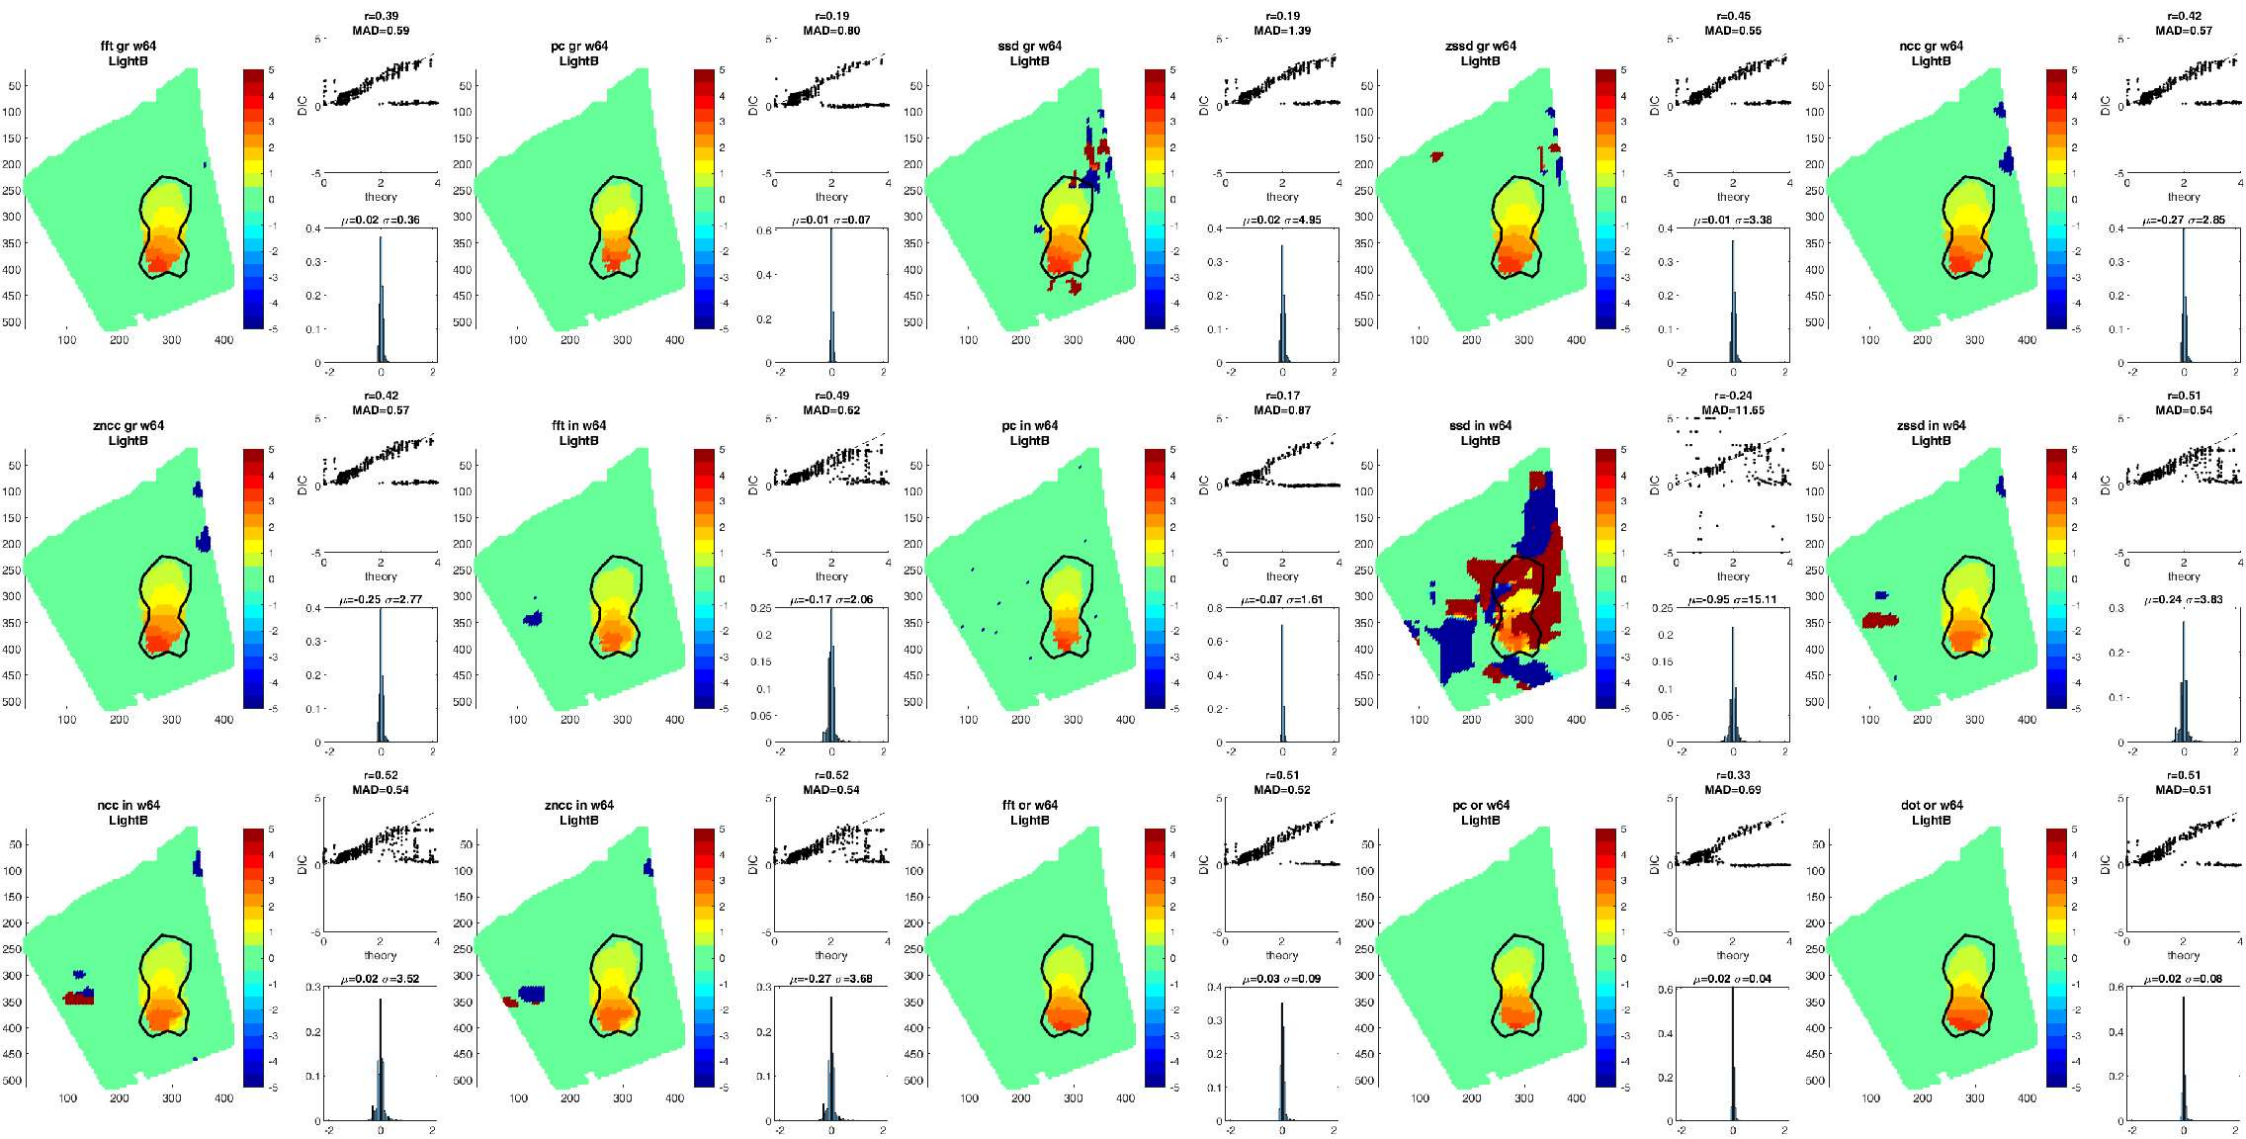



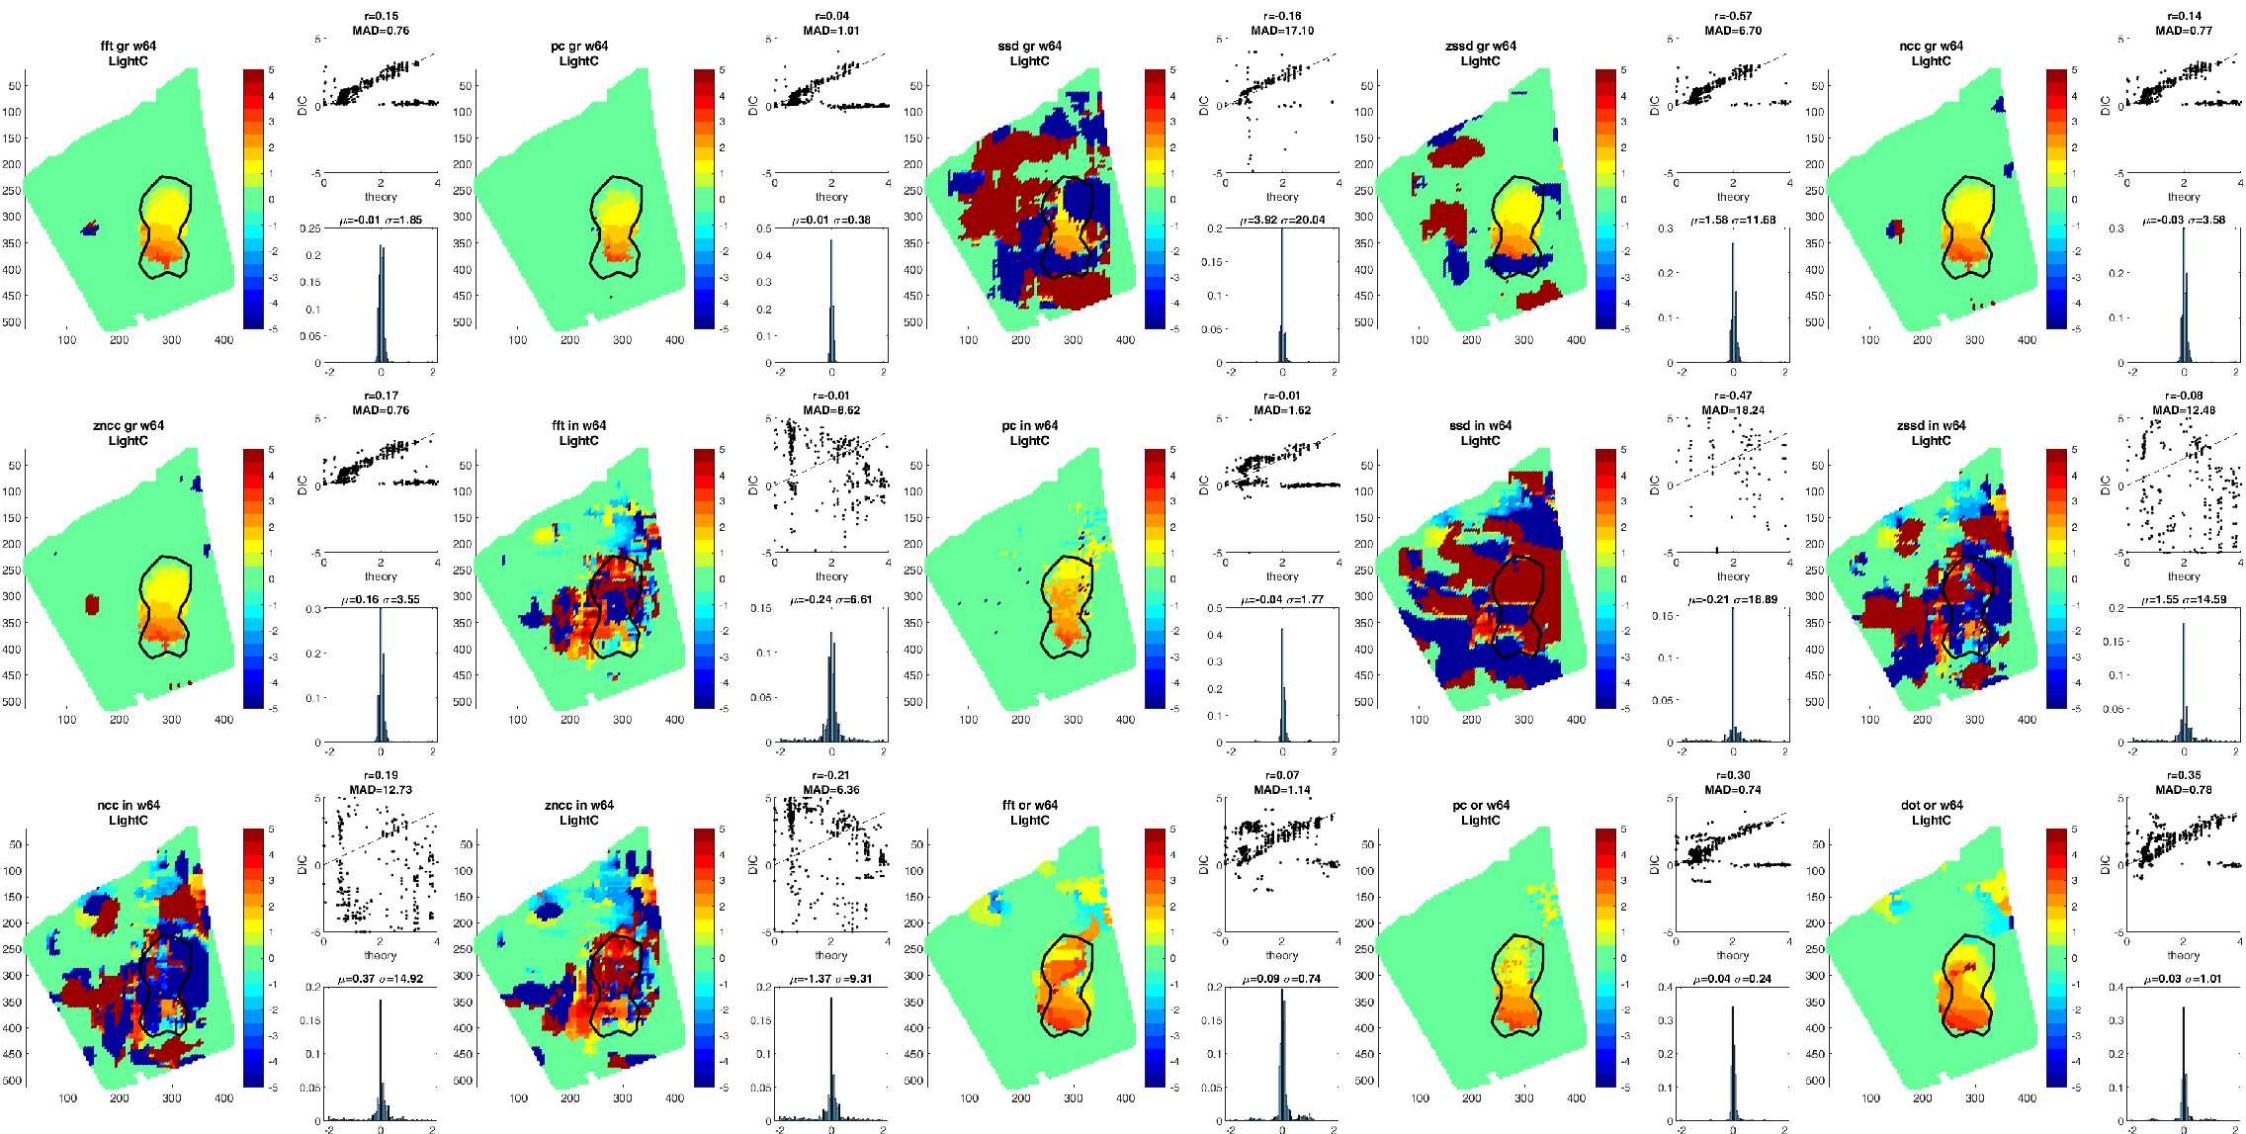

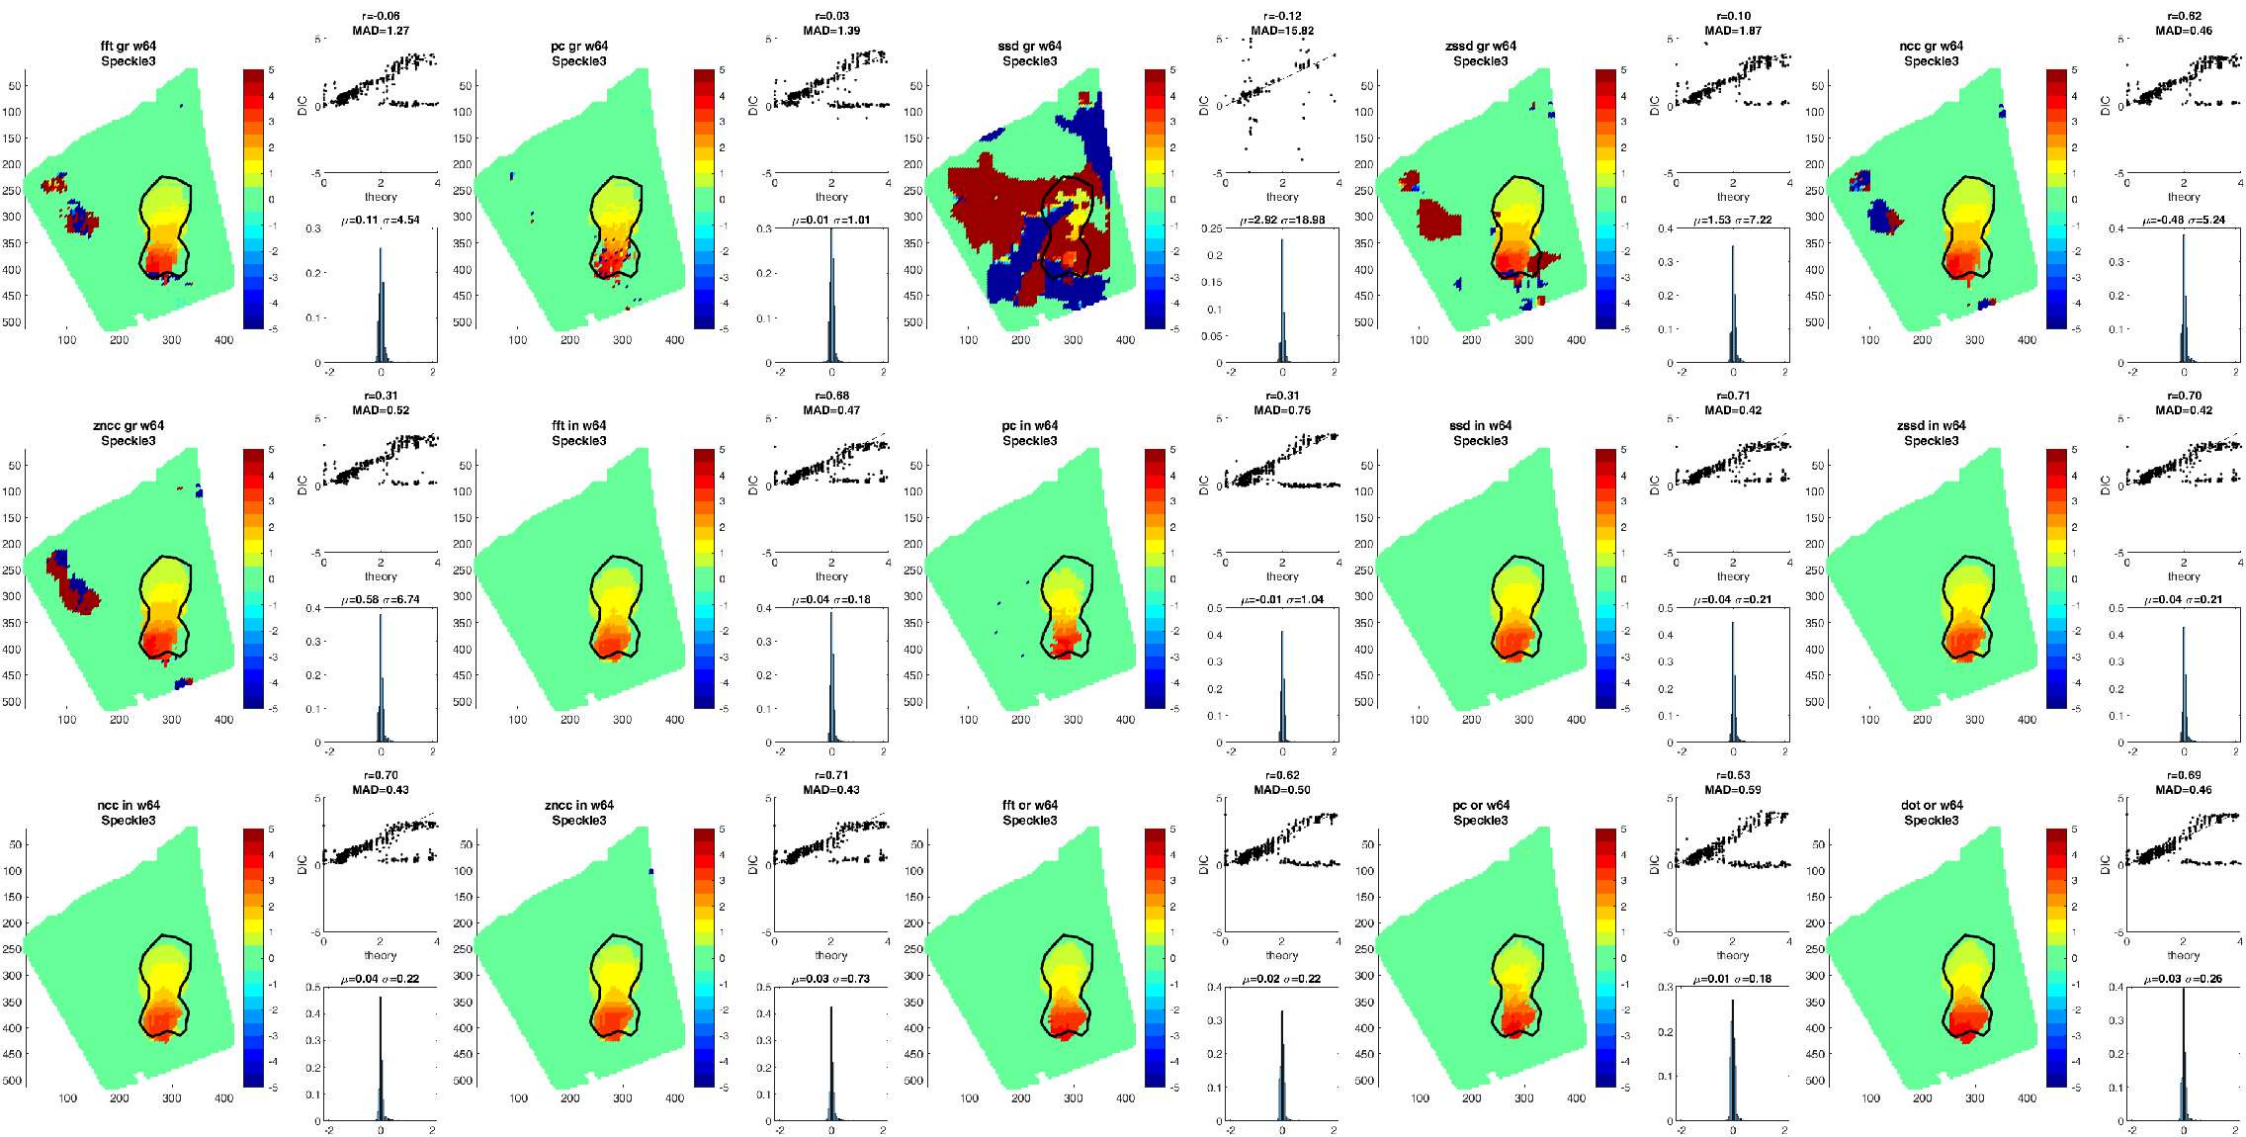



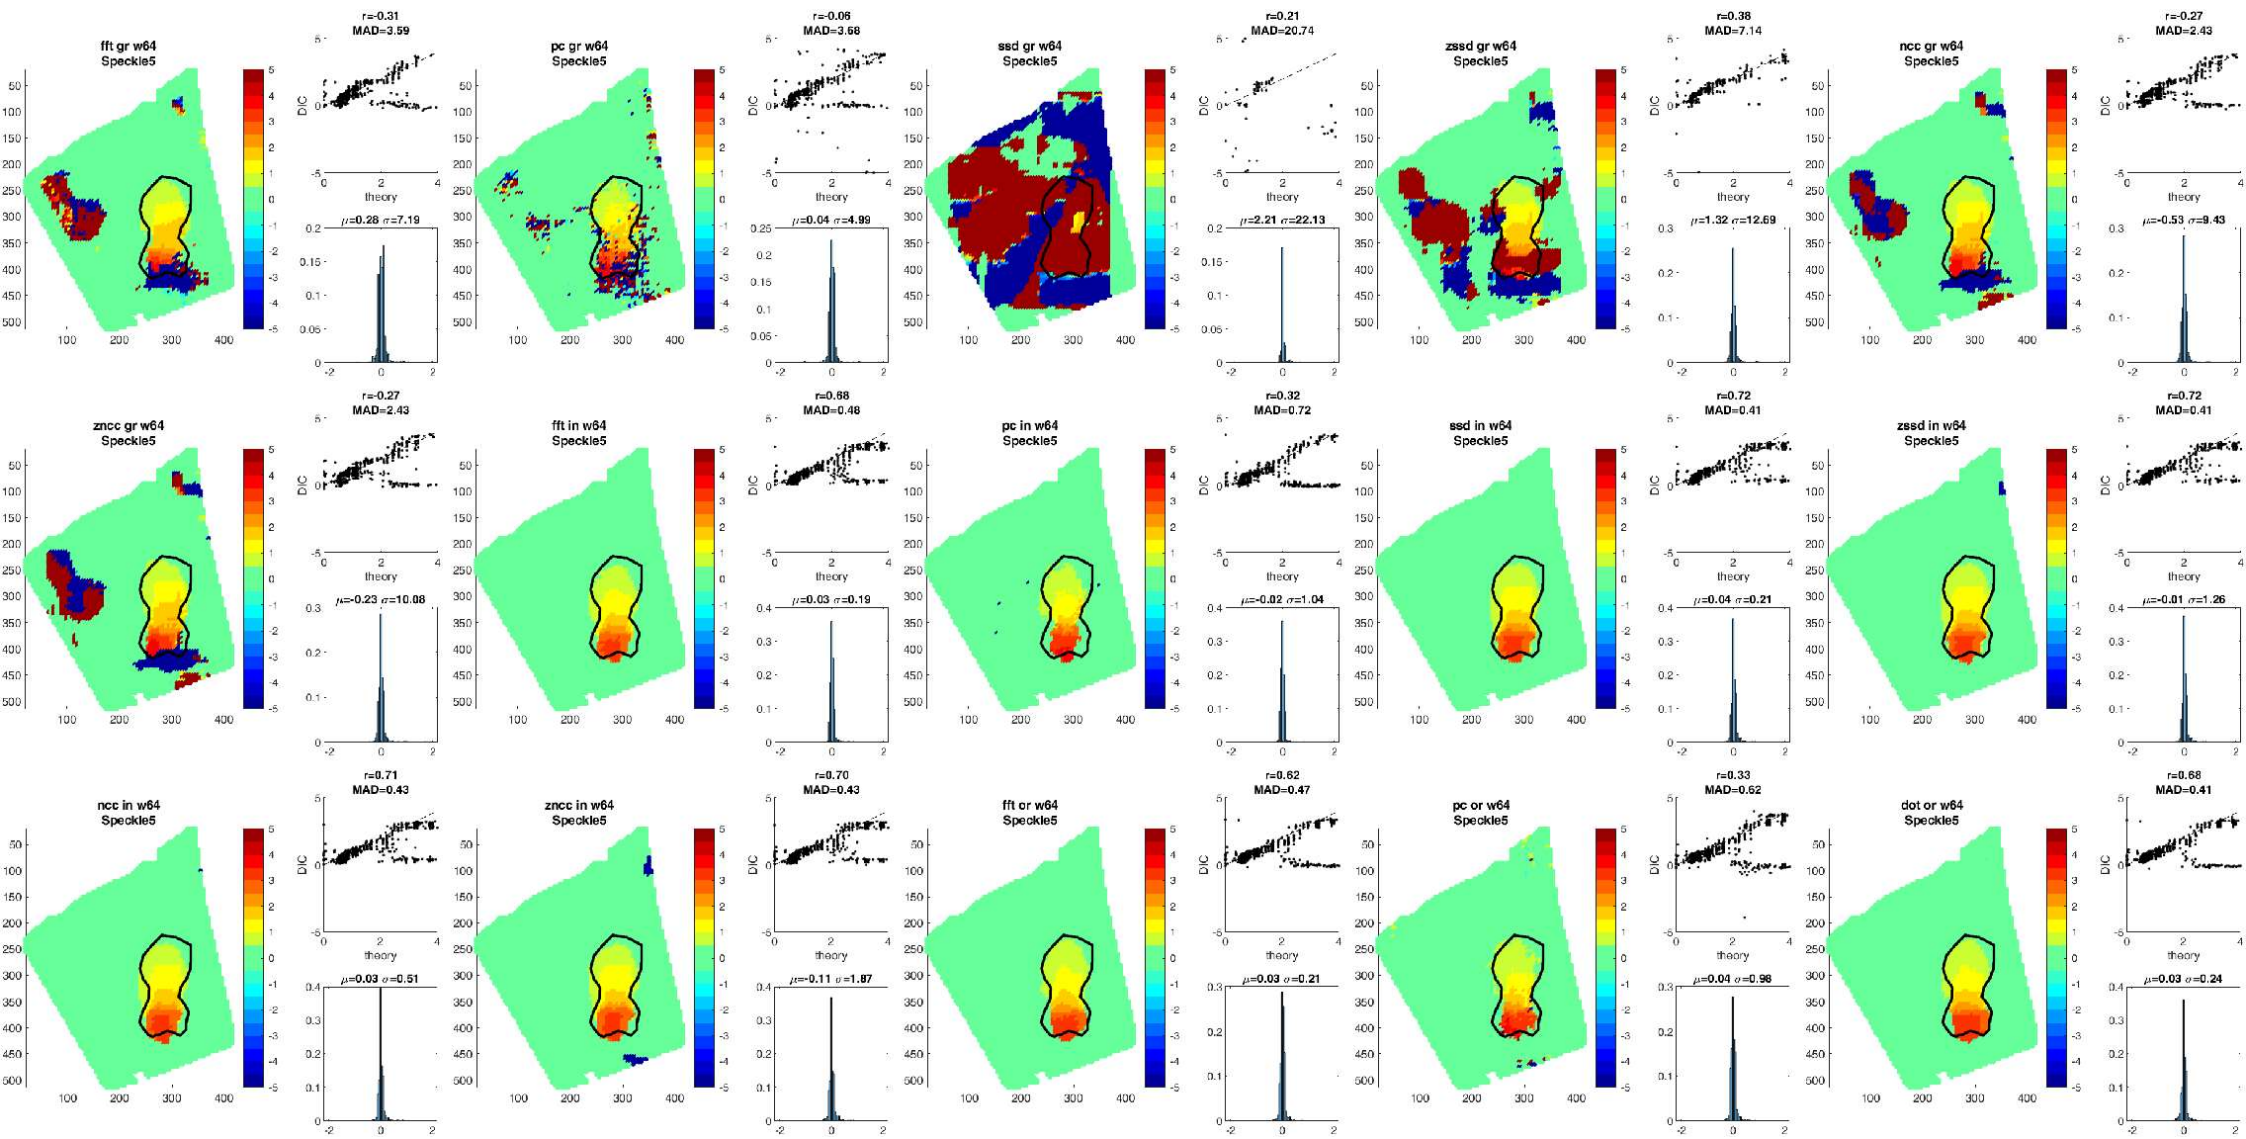

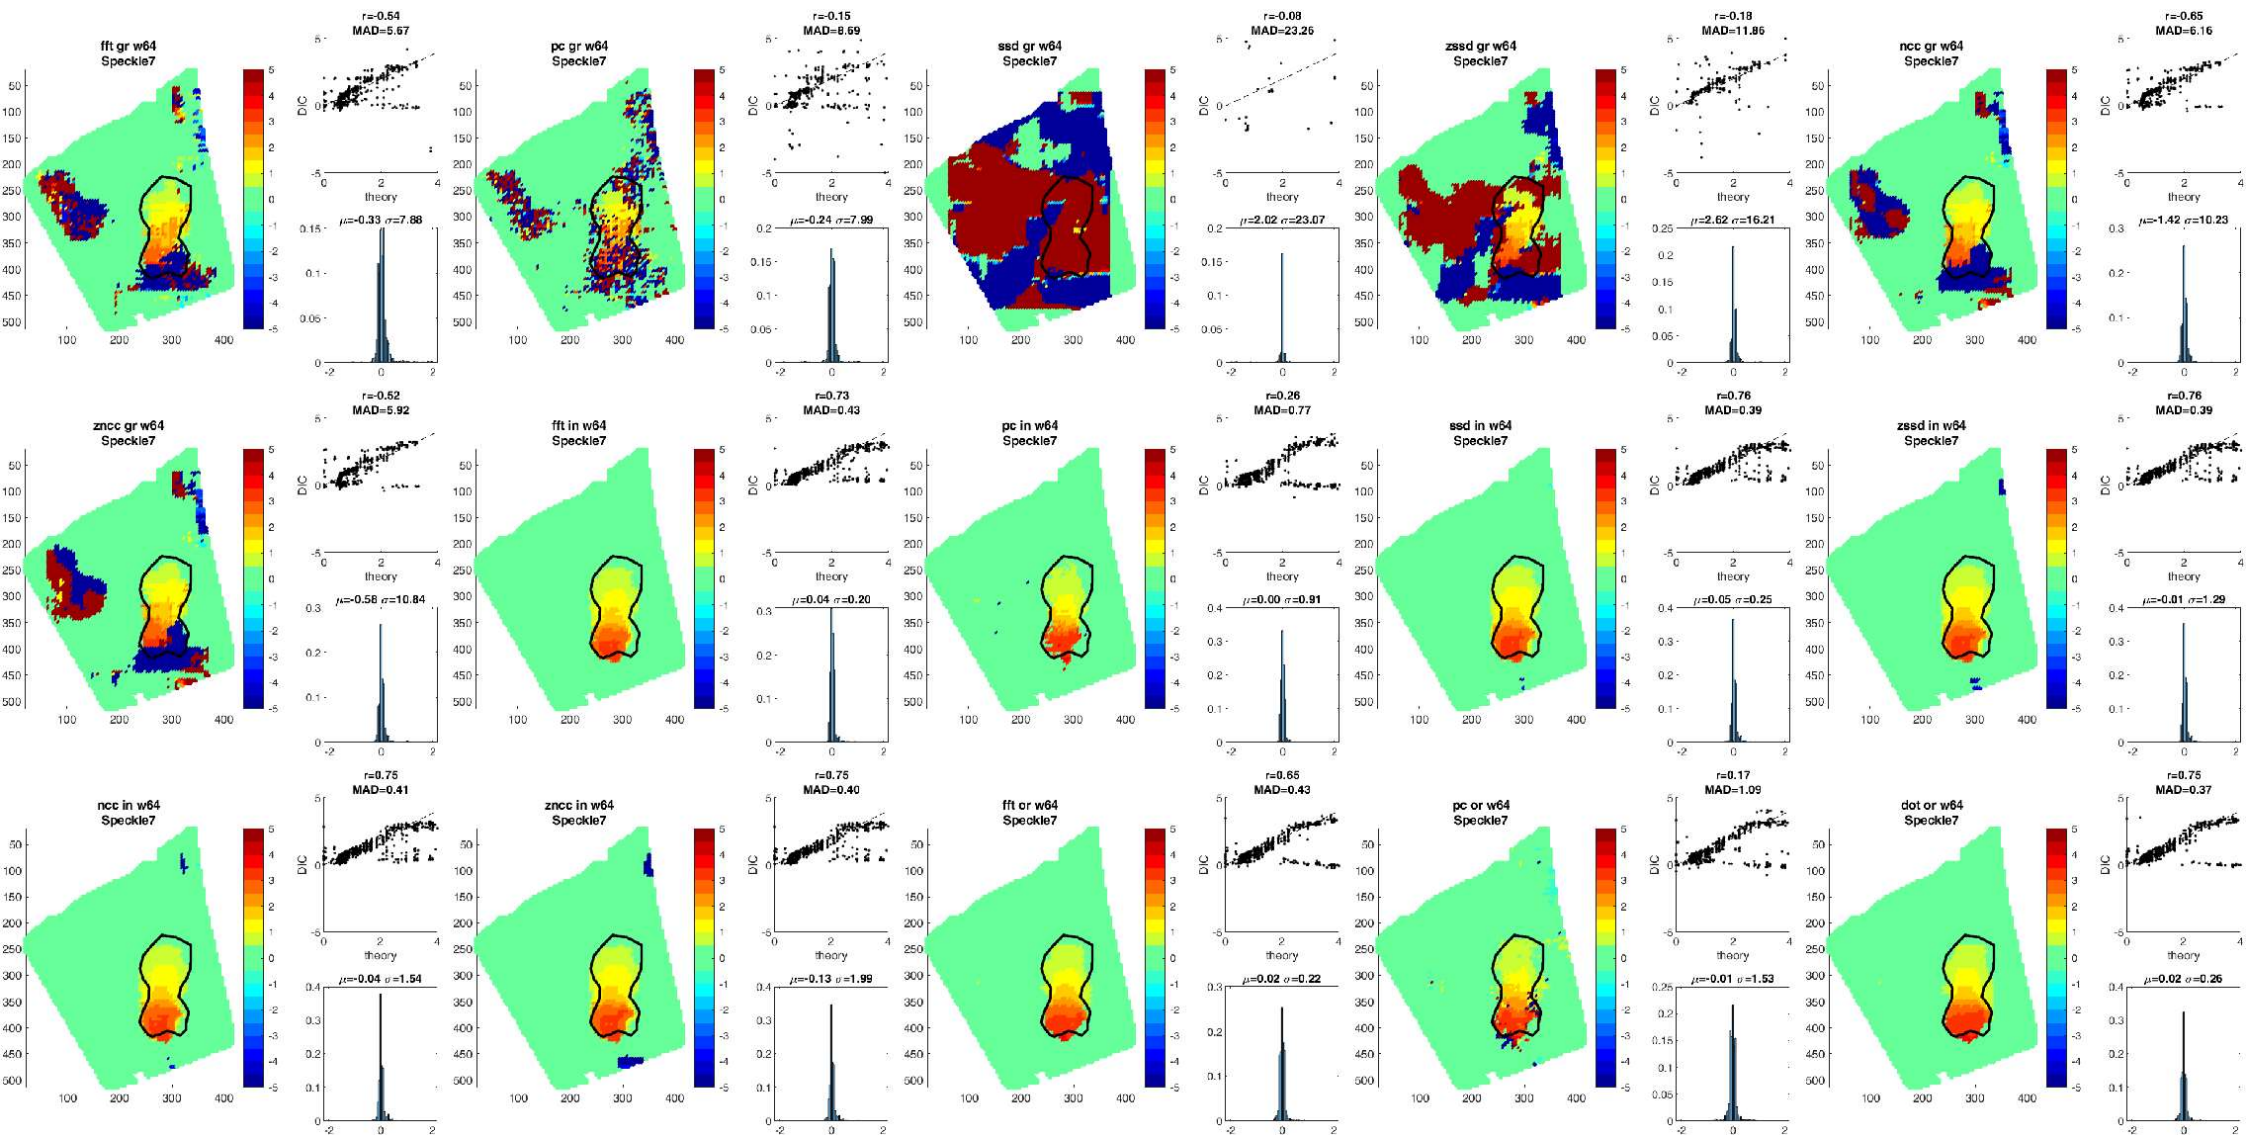

Supplement: s1 [file s1]

Template size 8x8

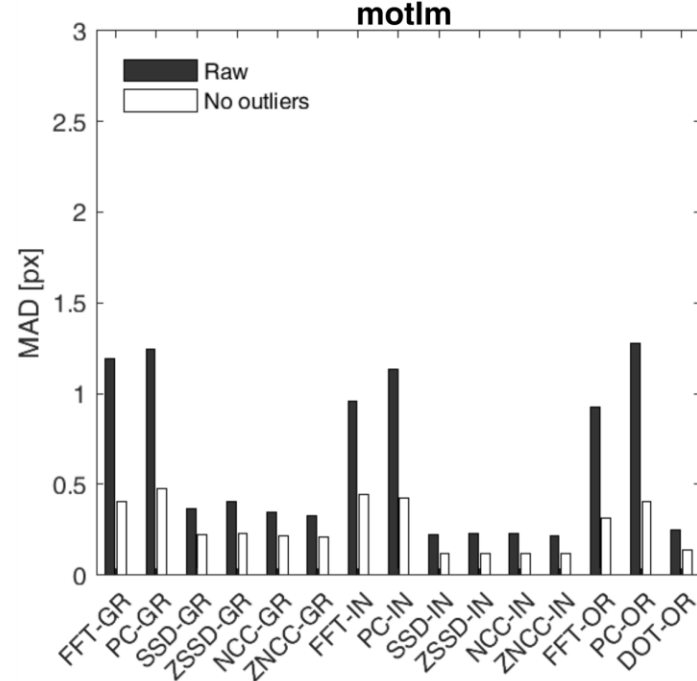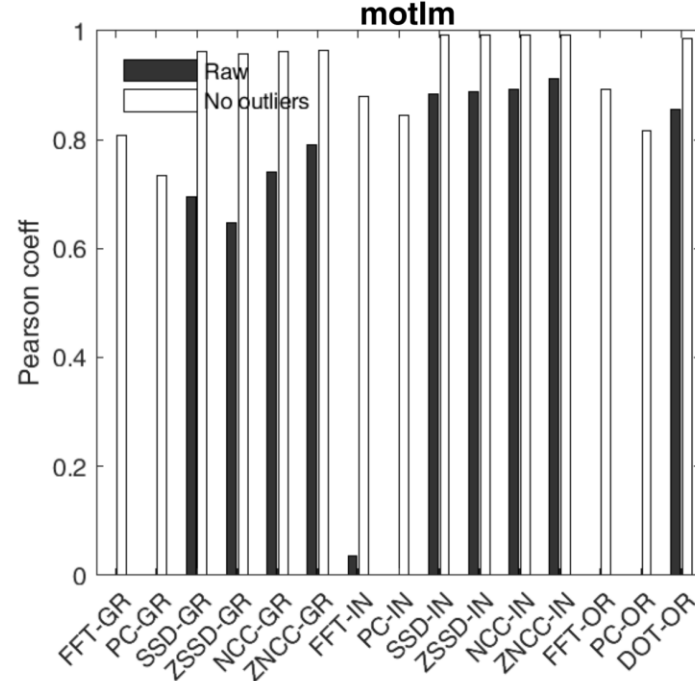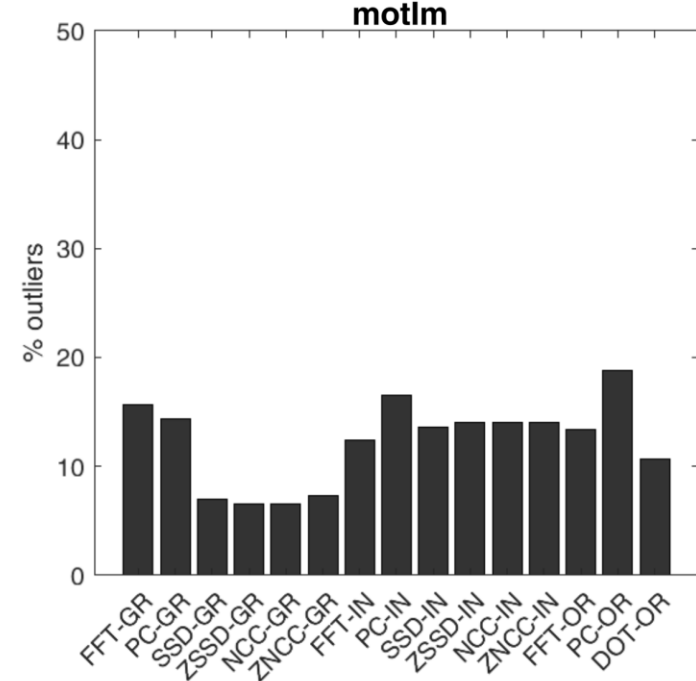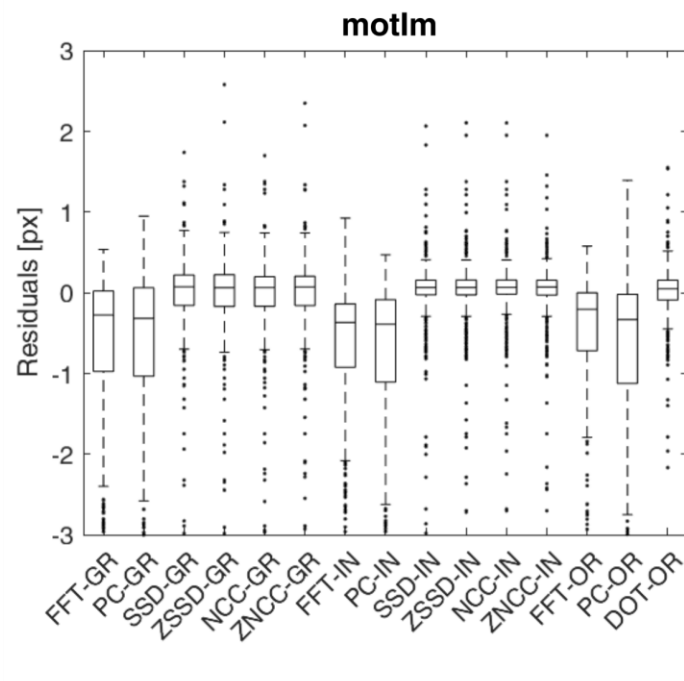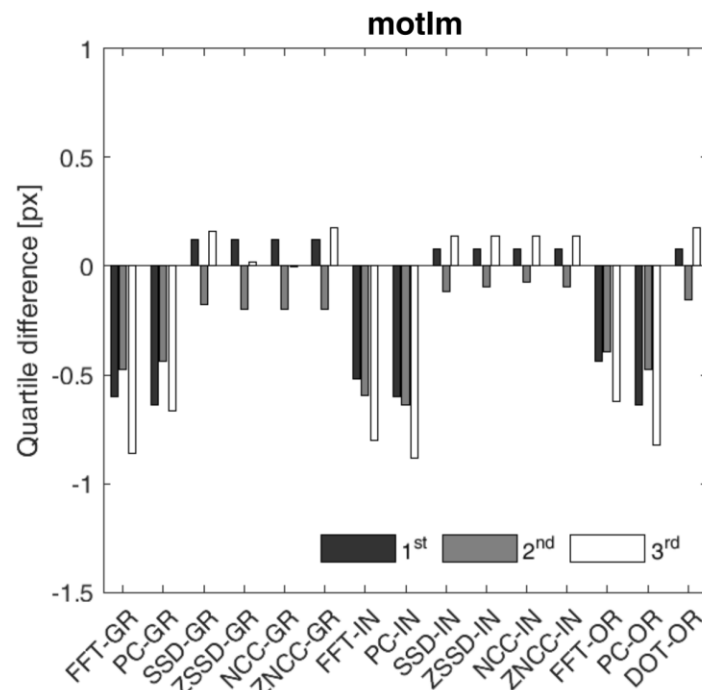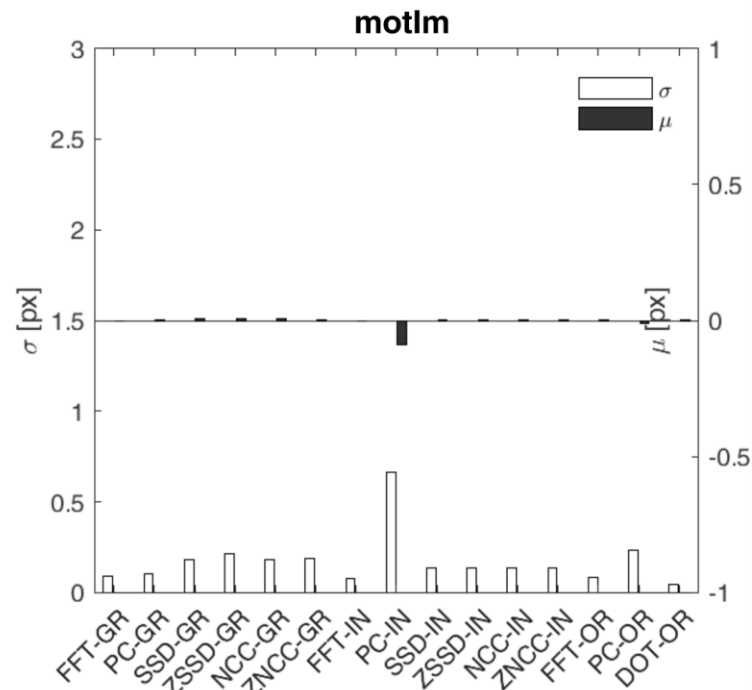

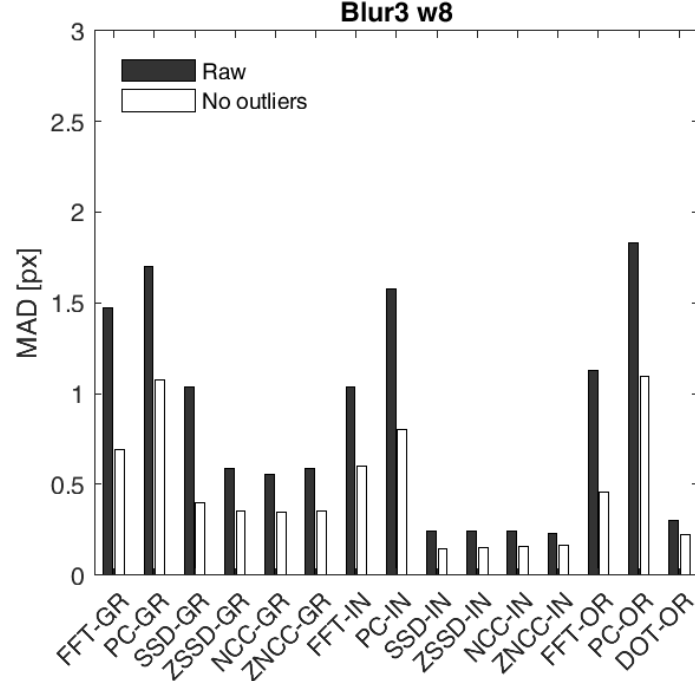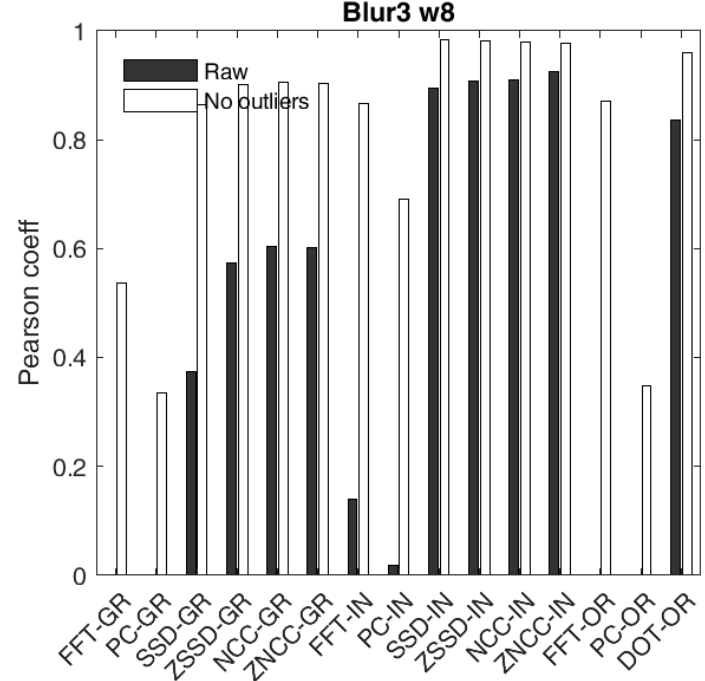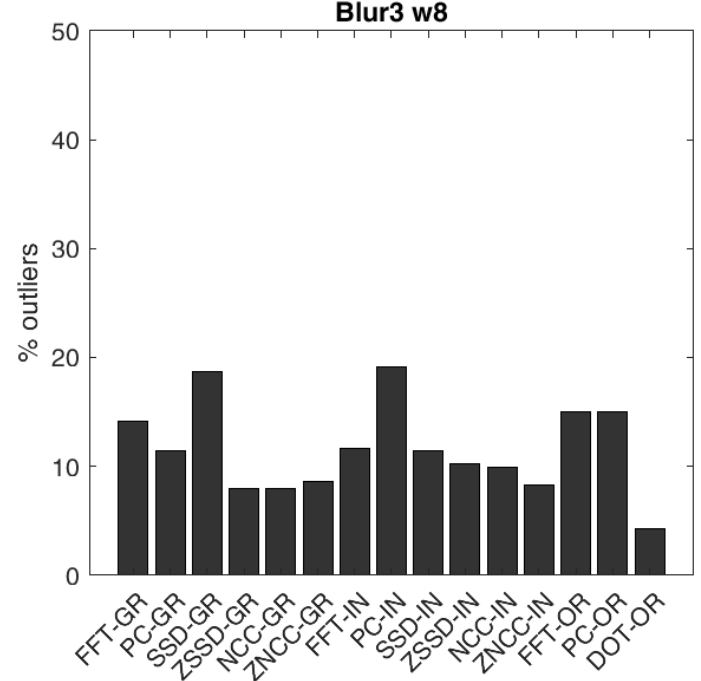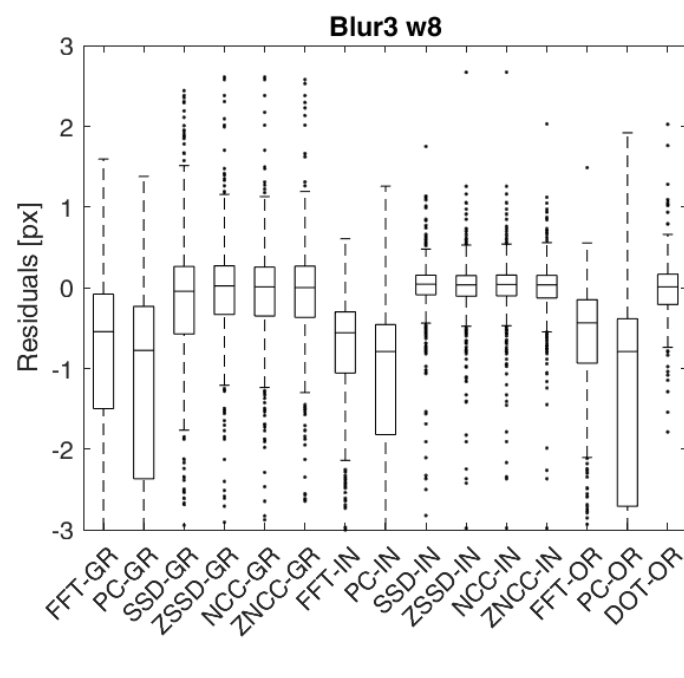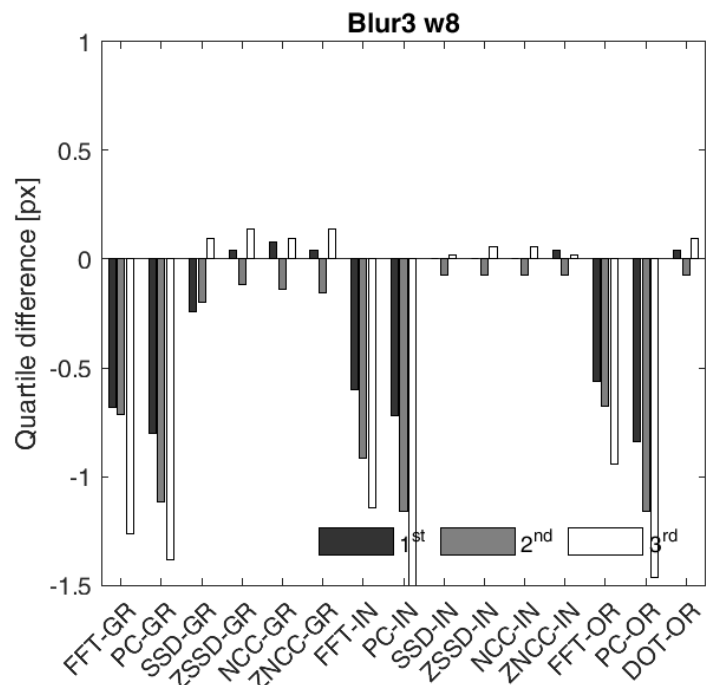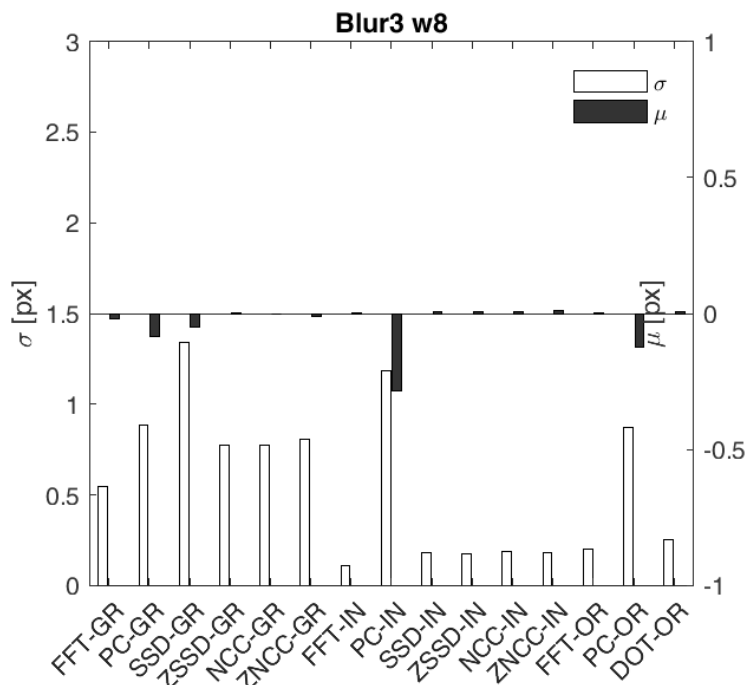

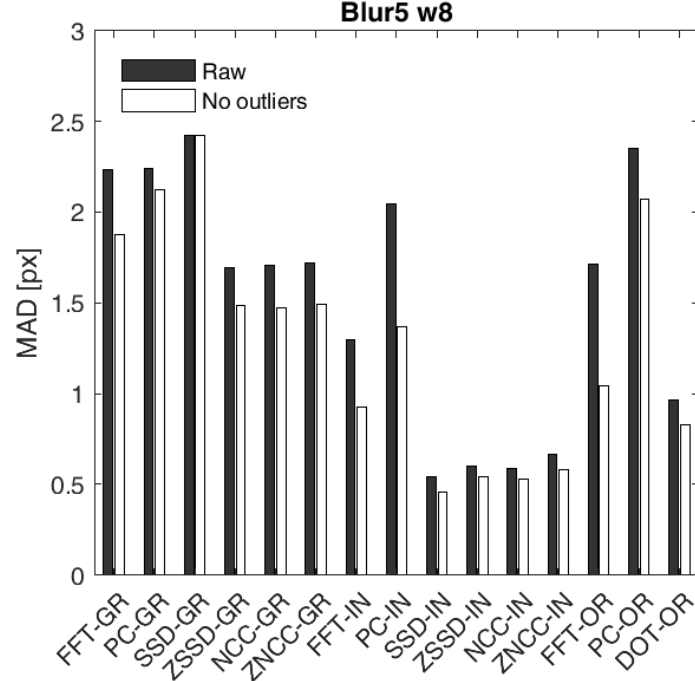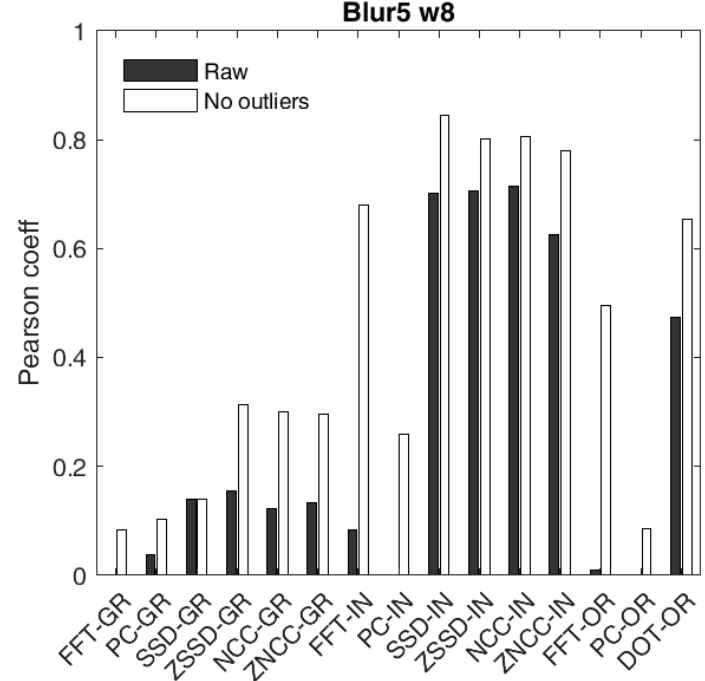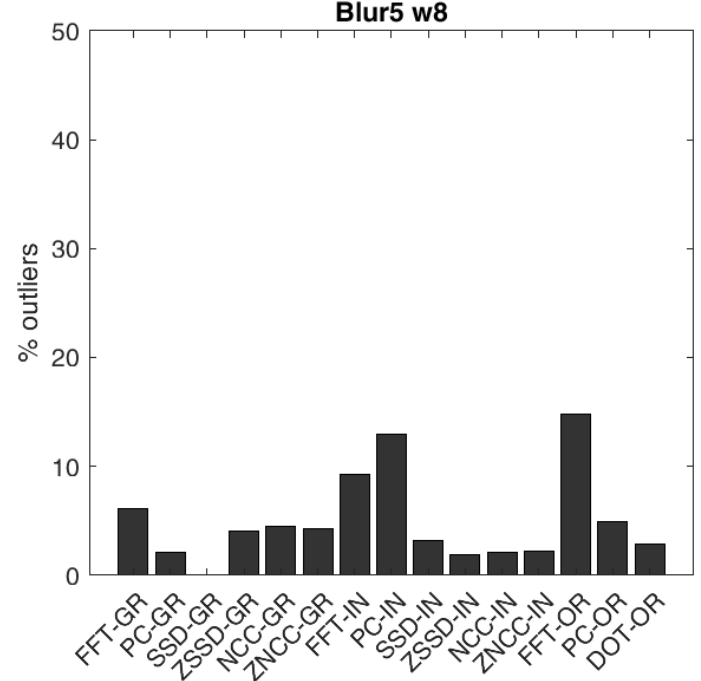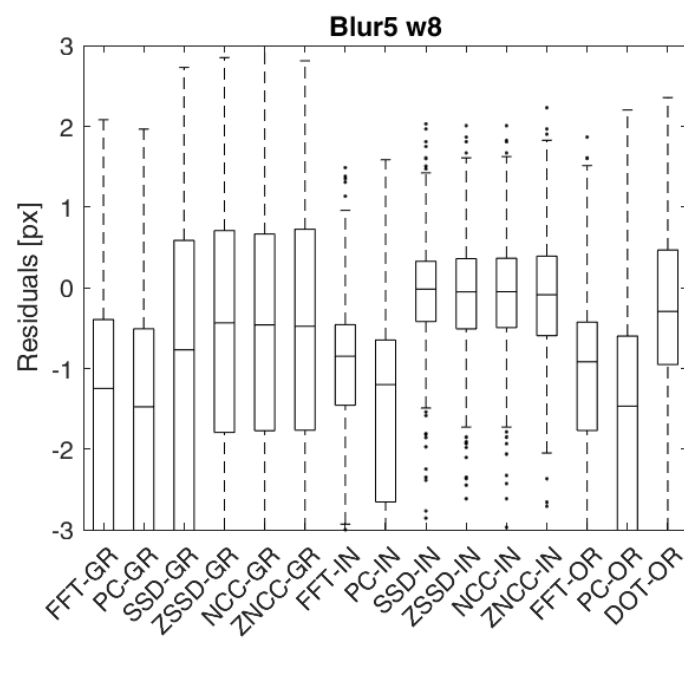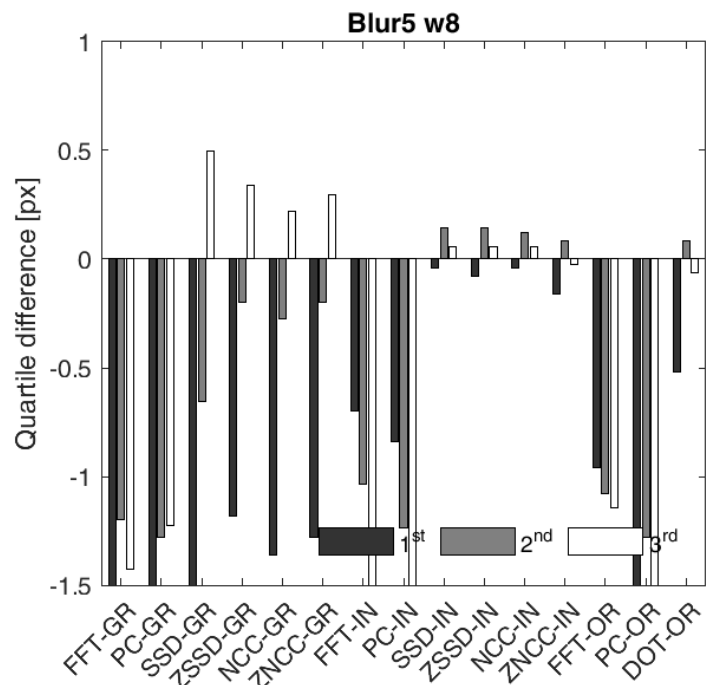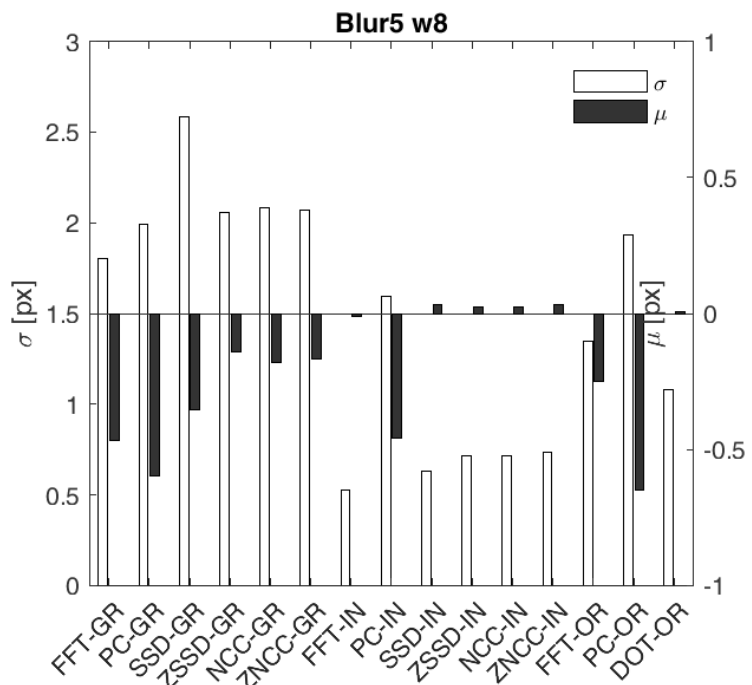

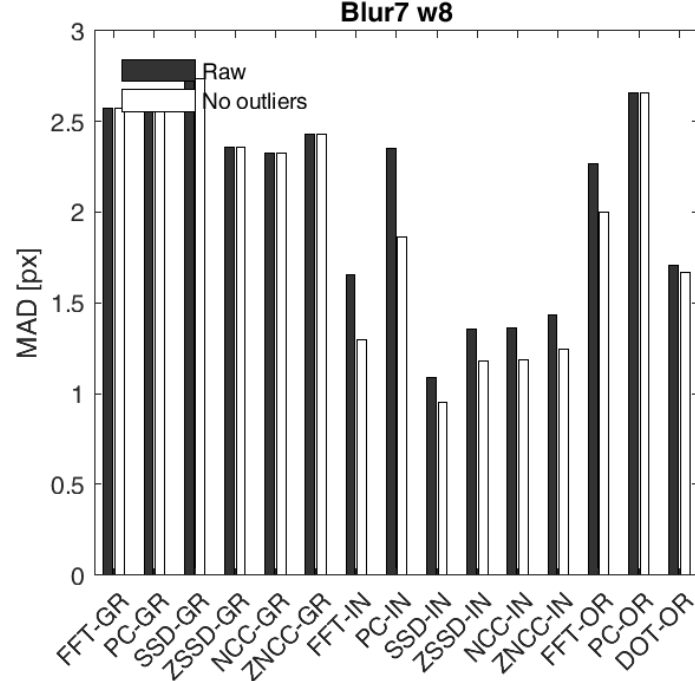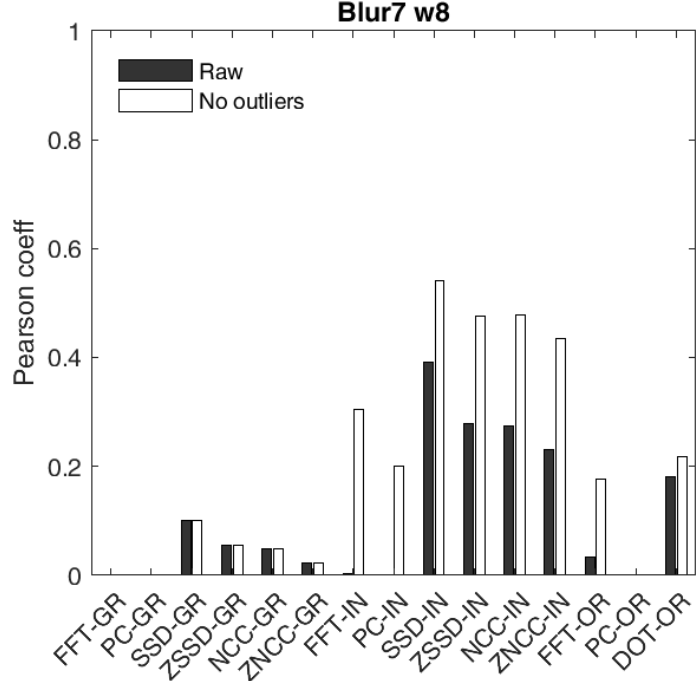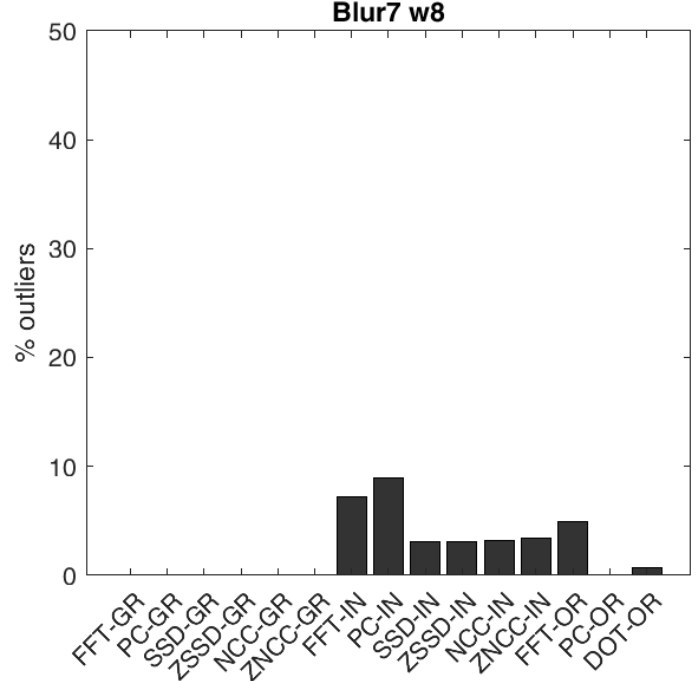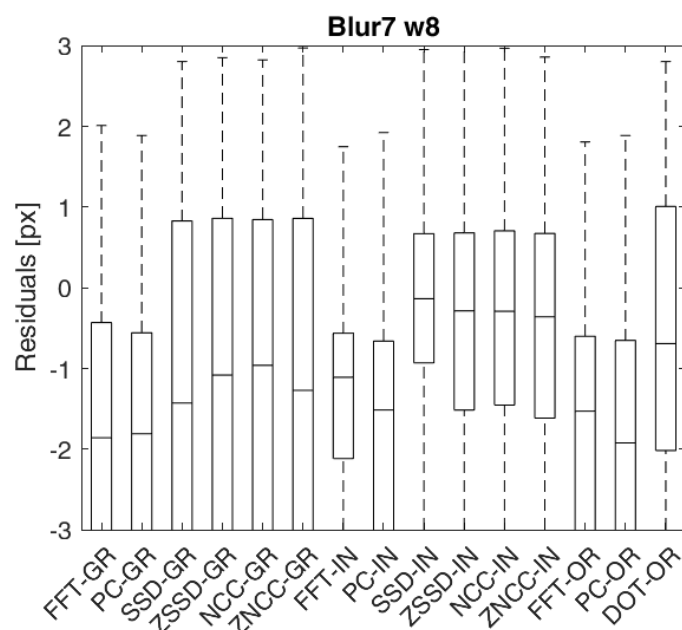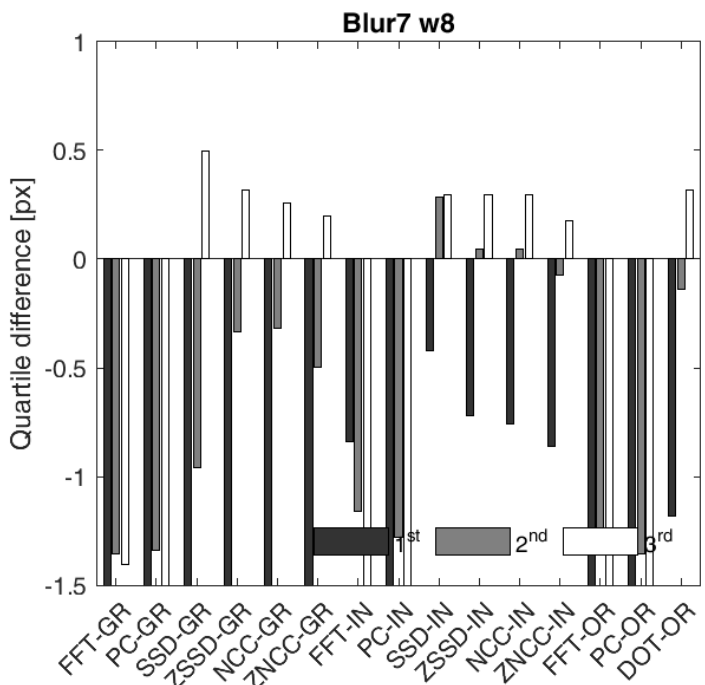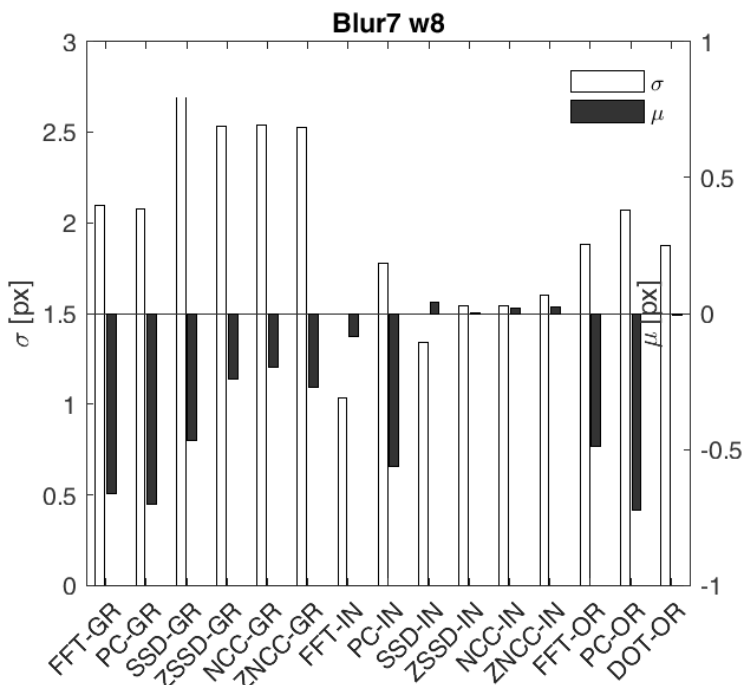

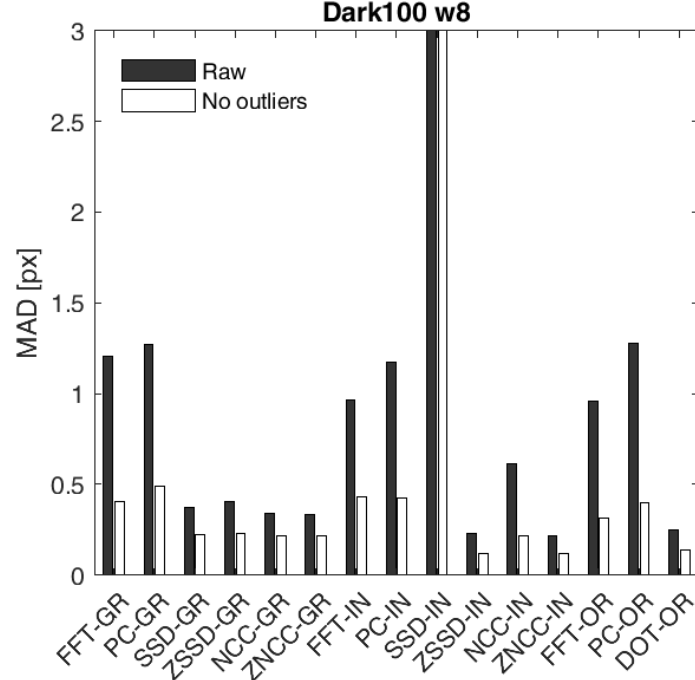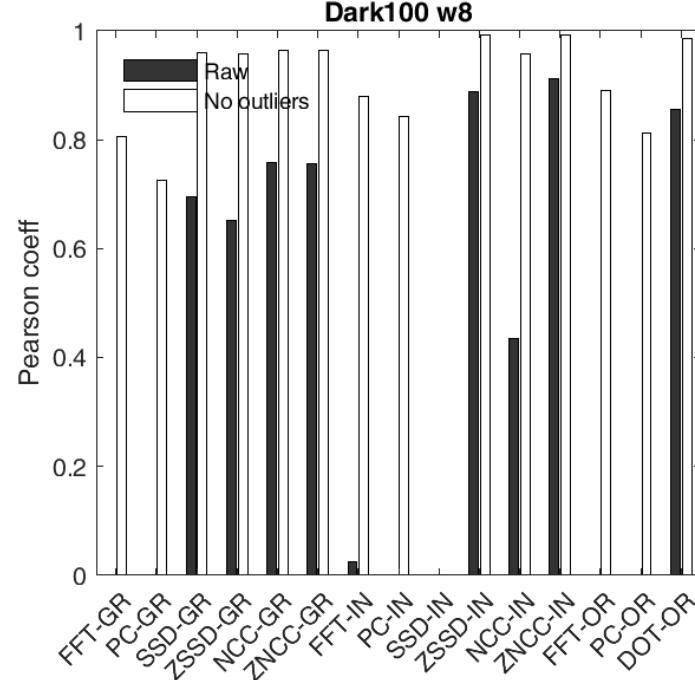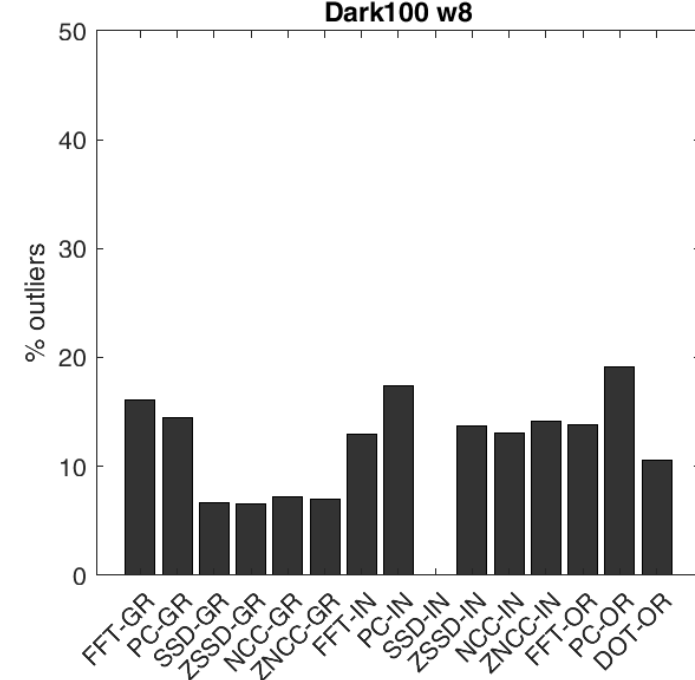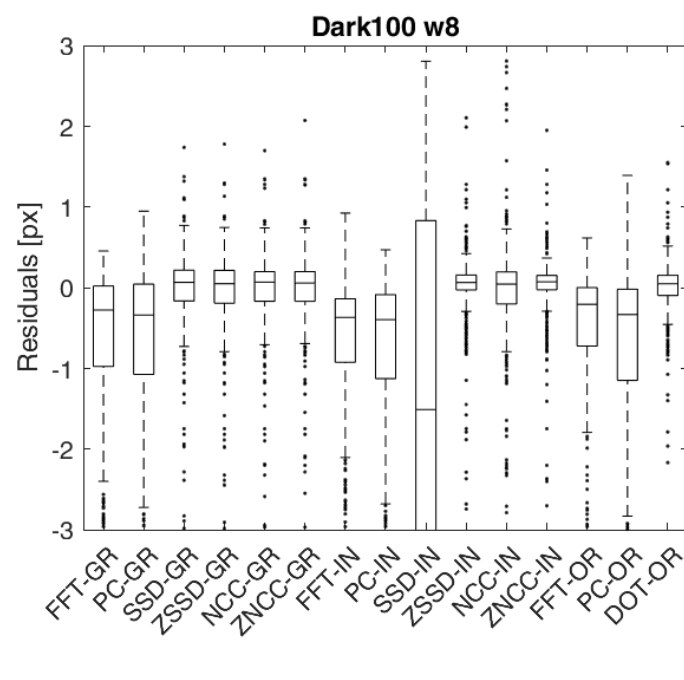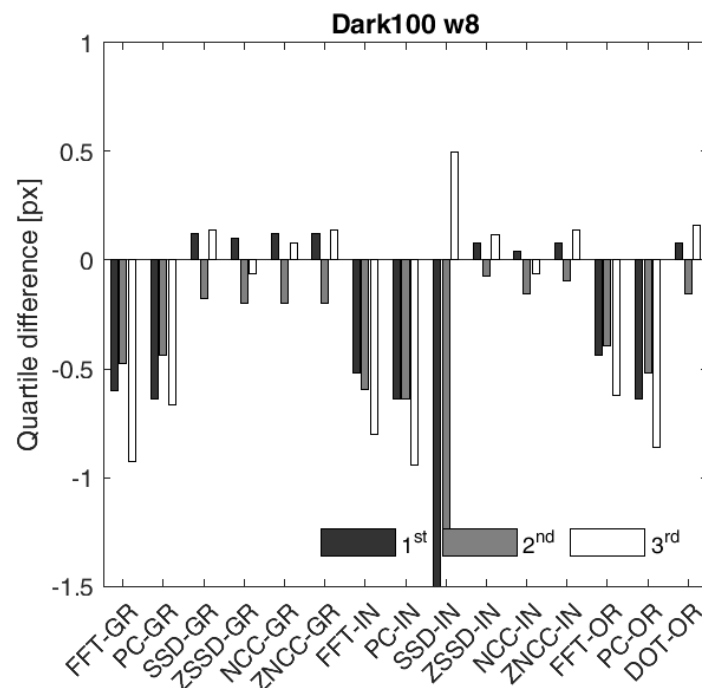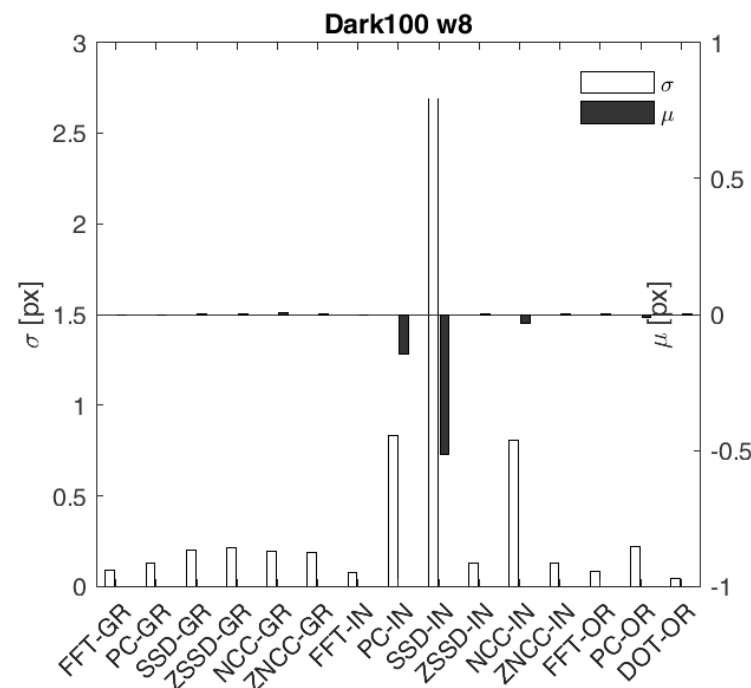

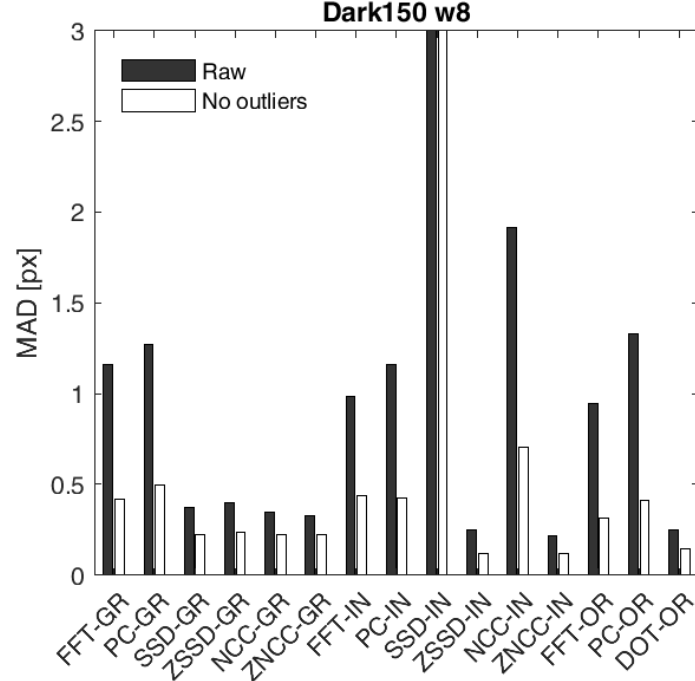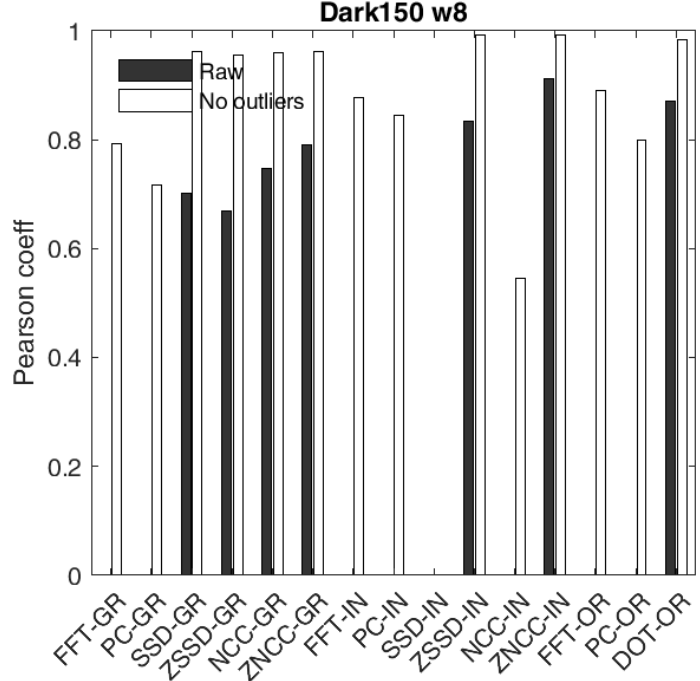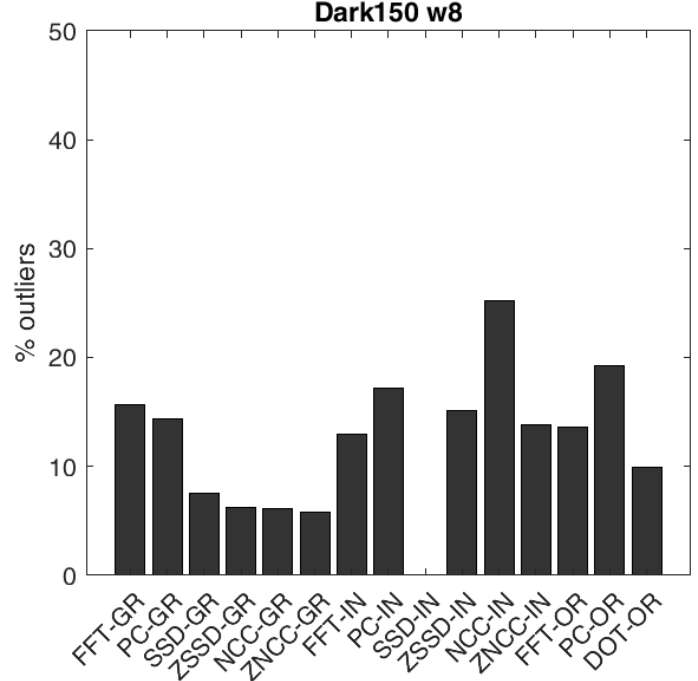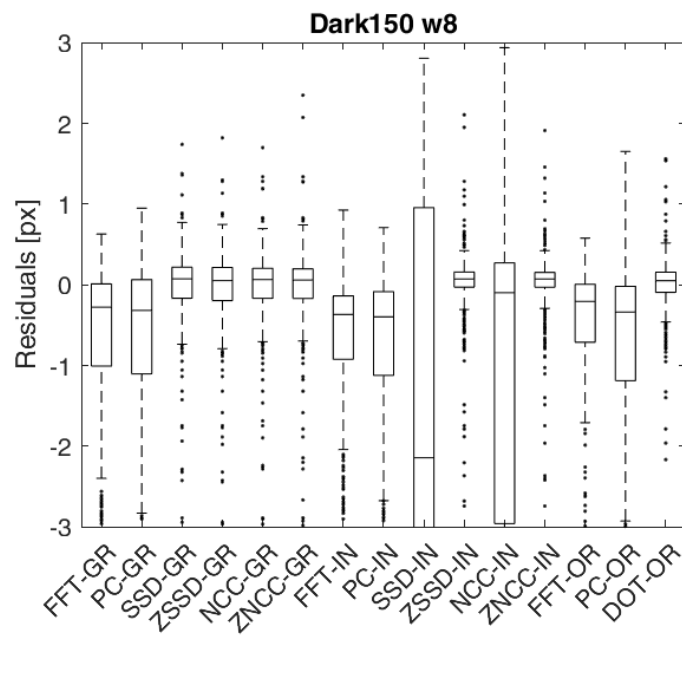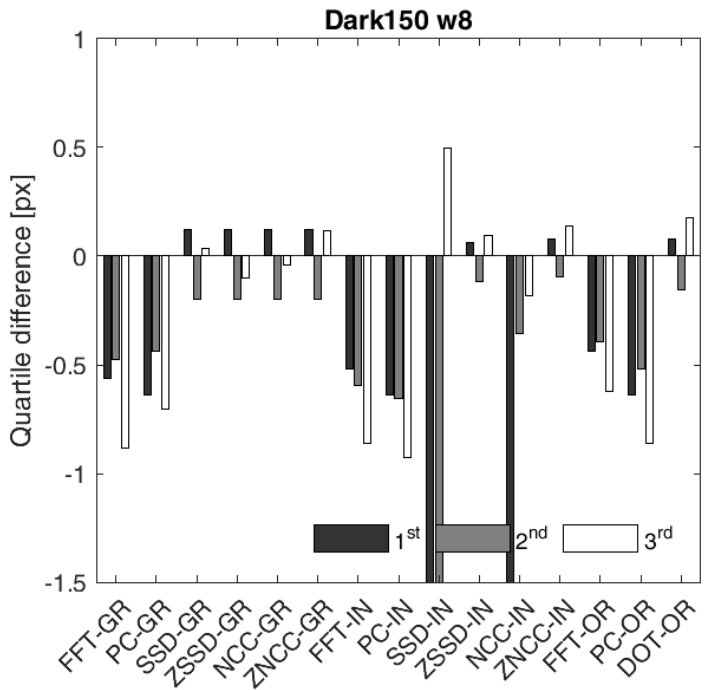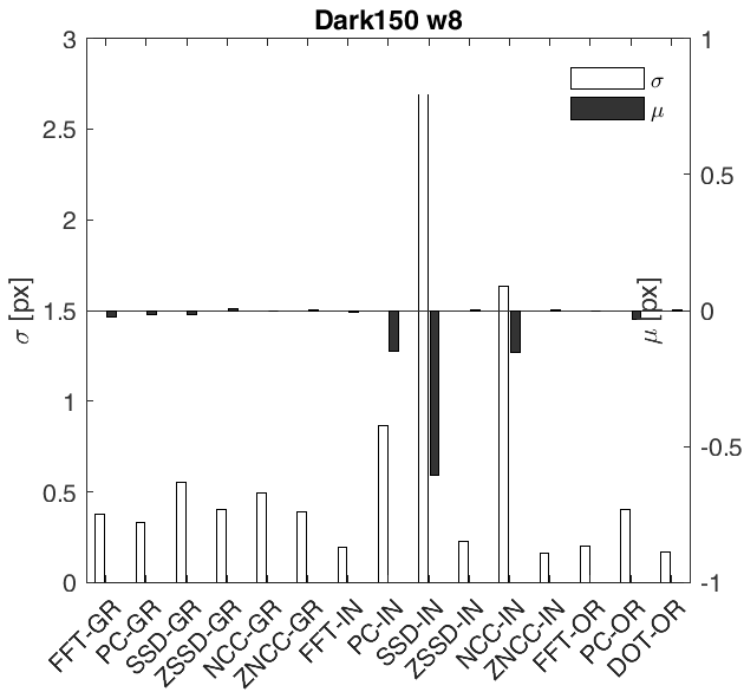

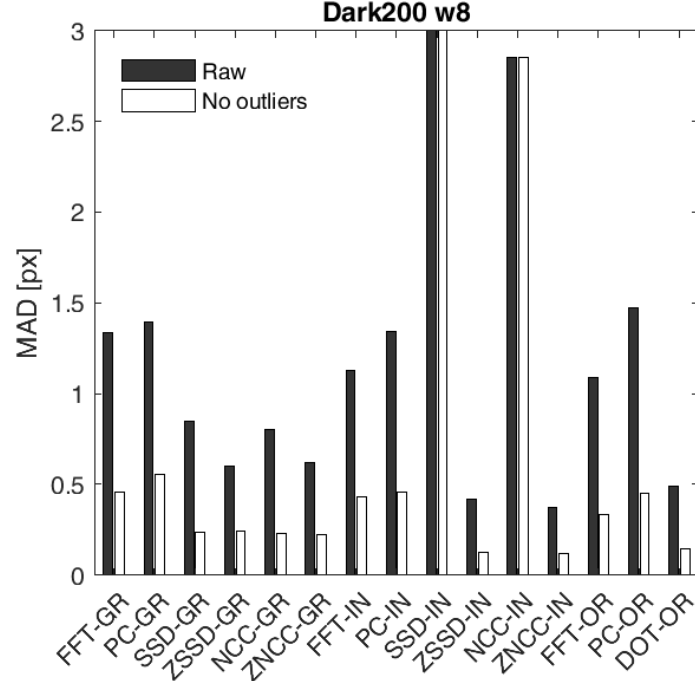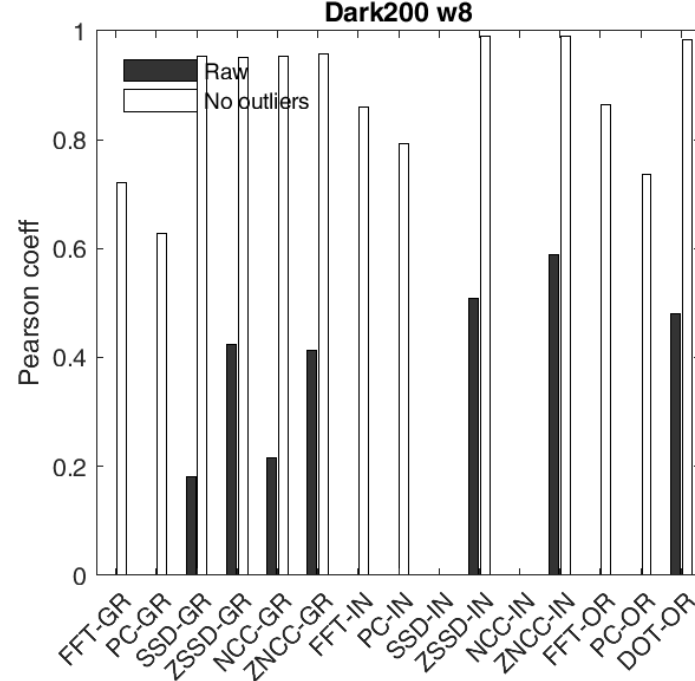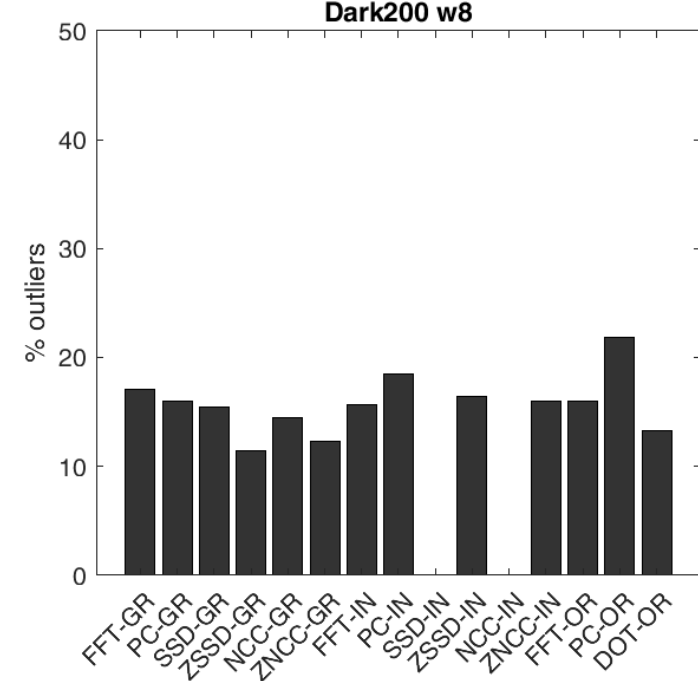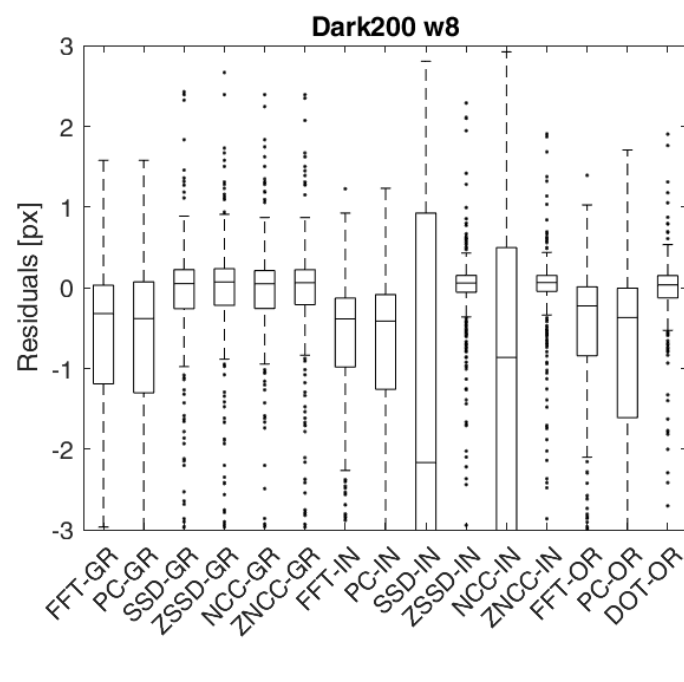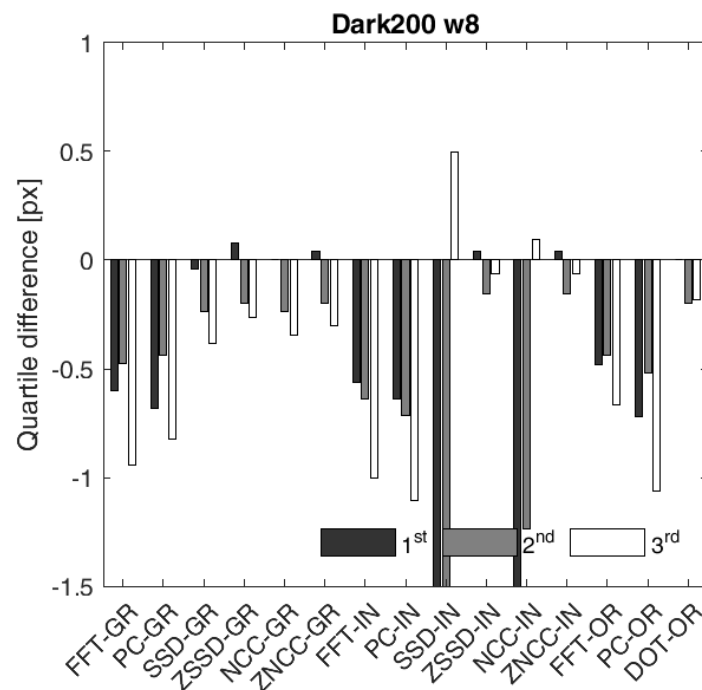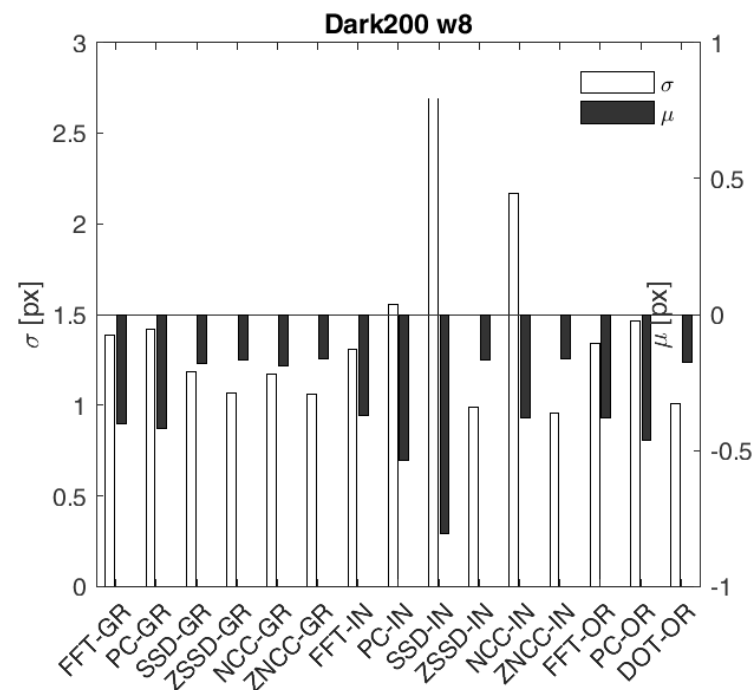



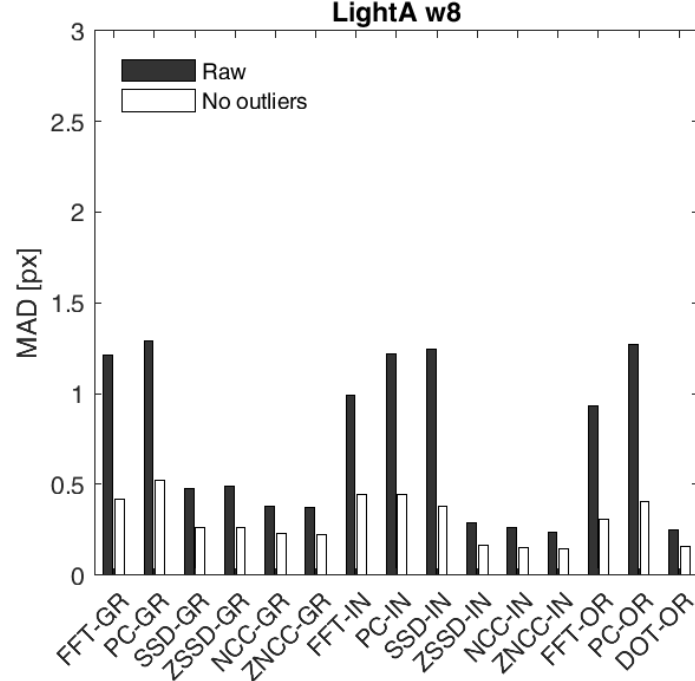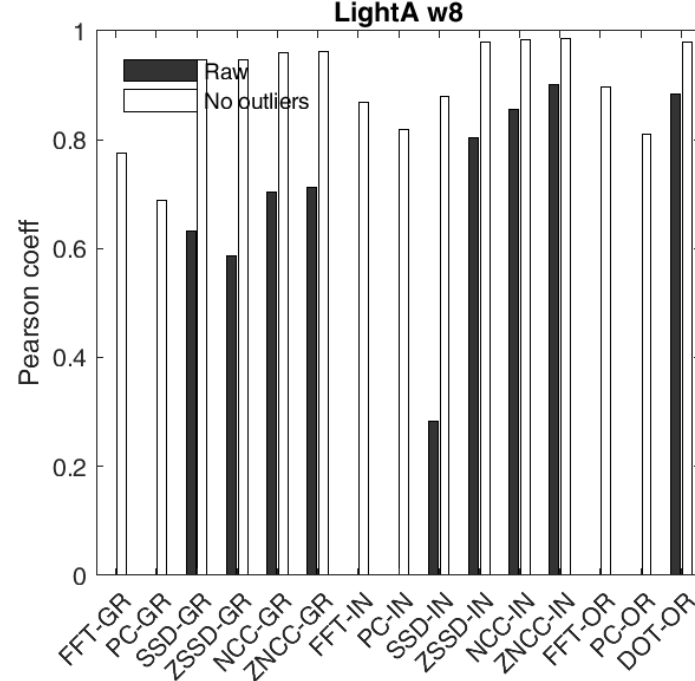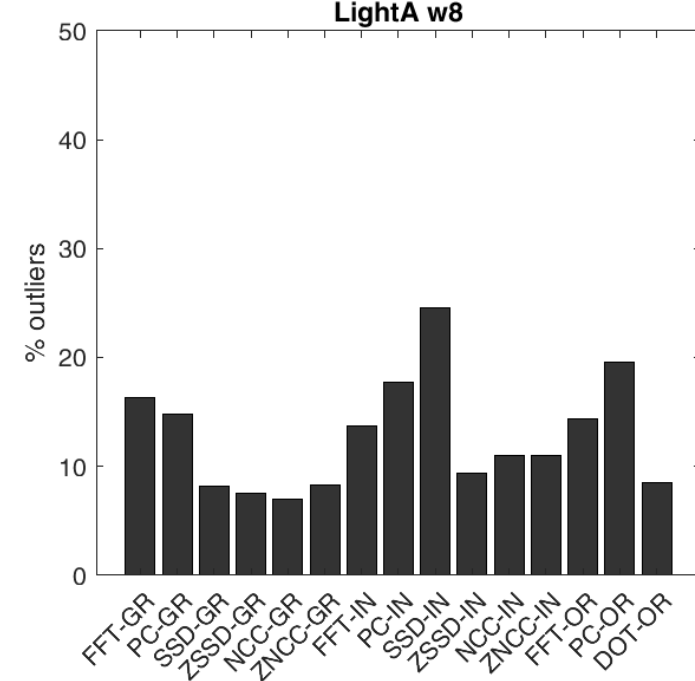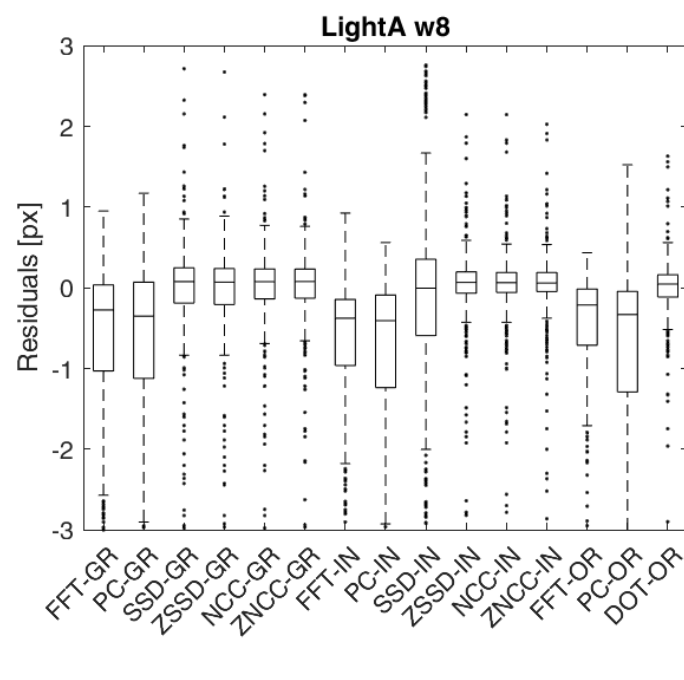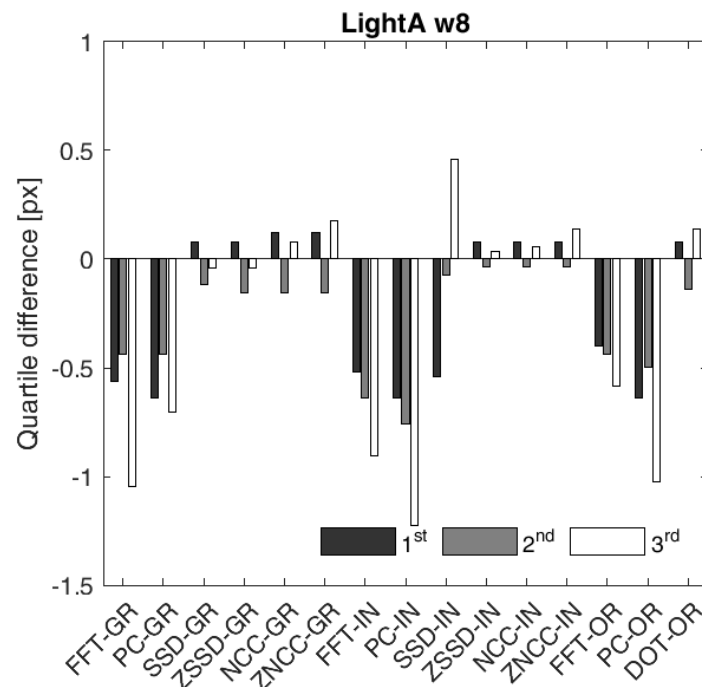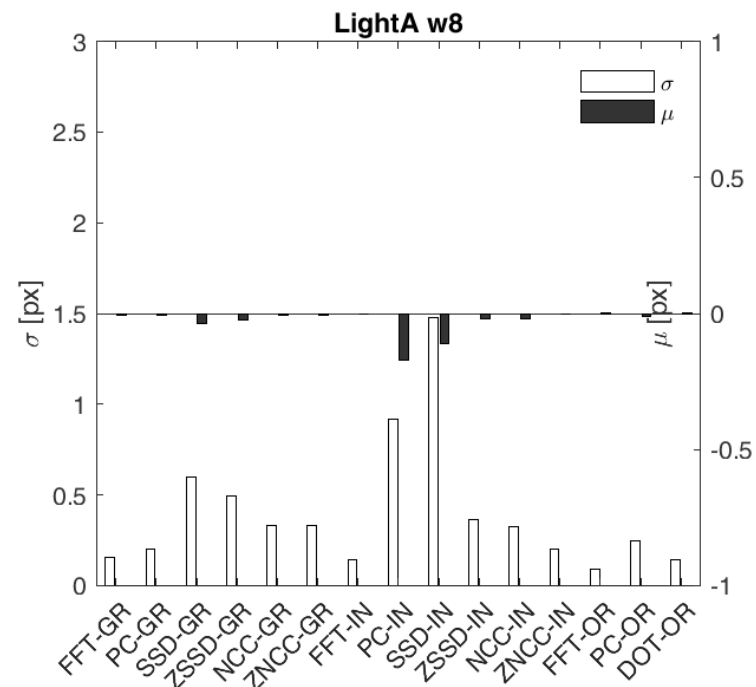

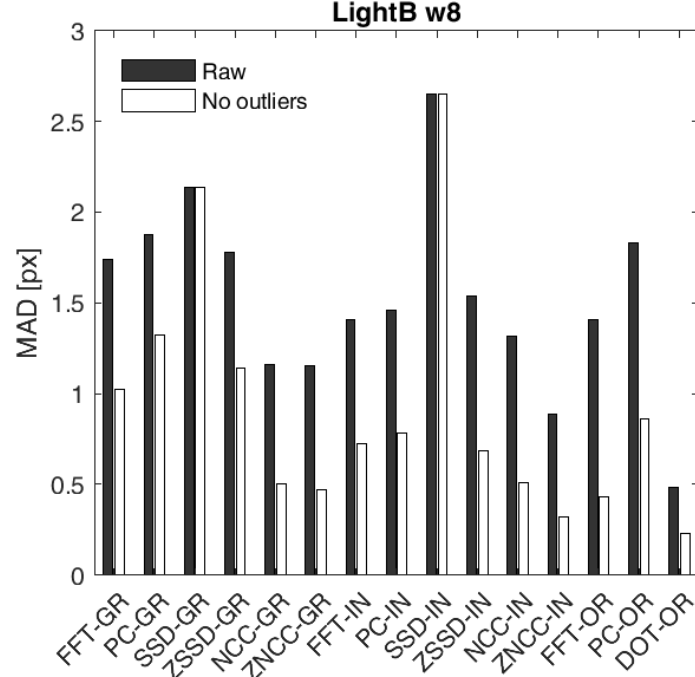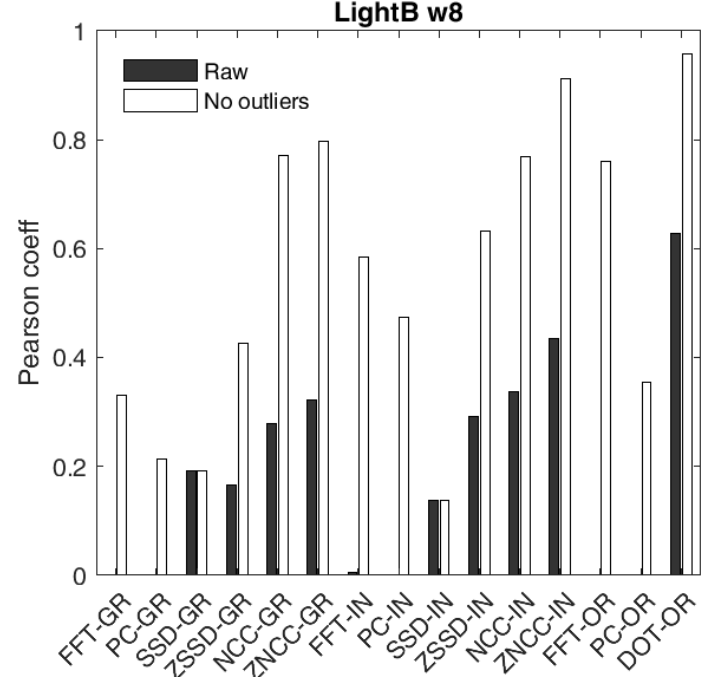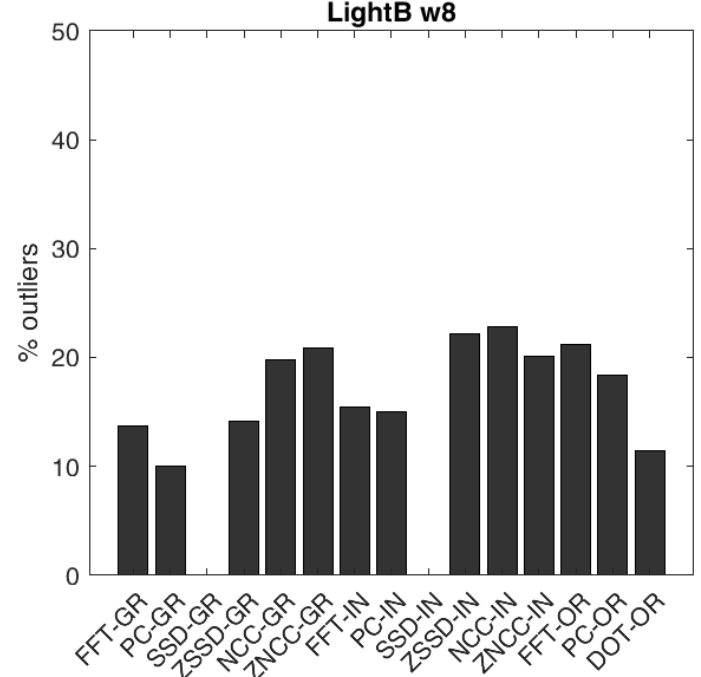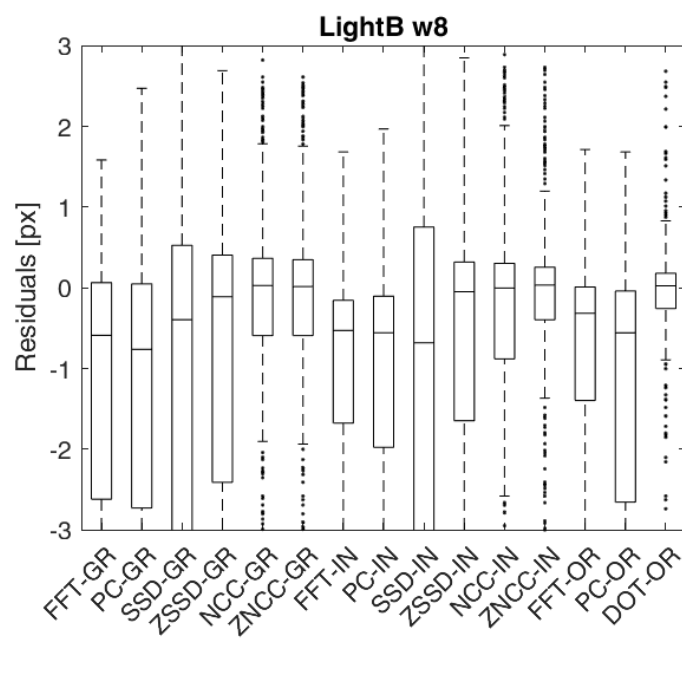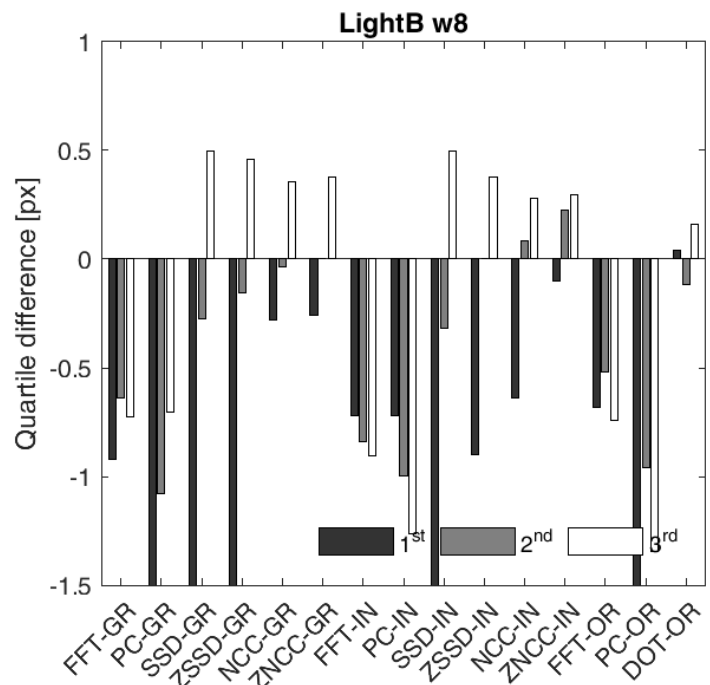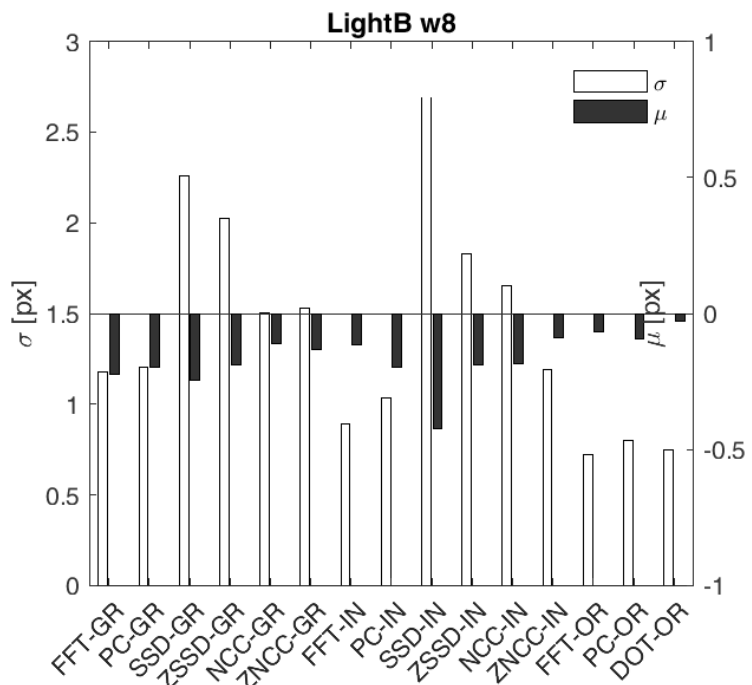

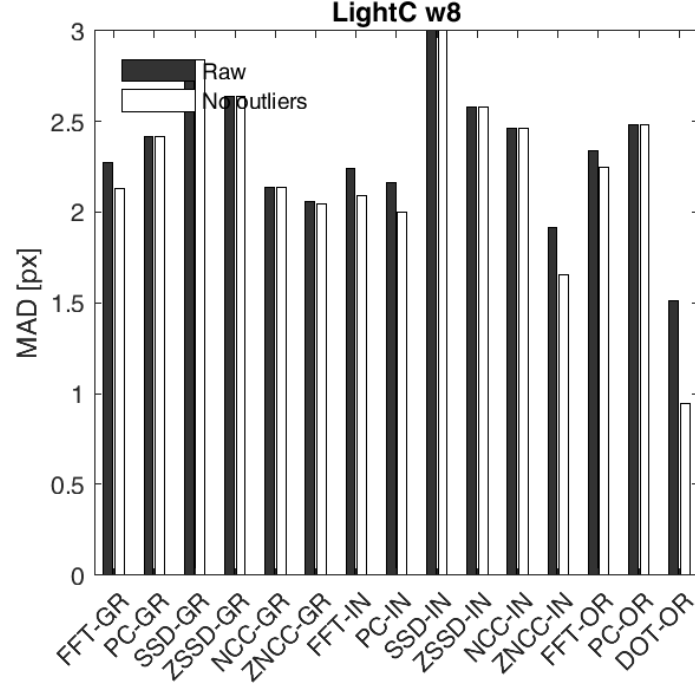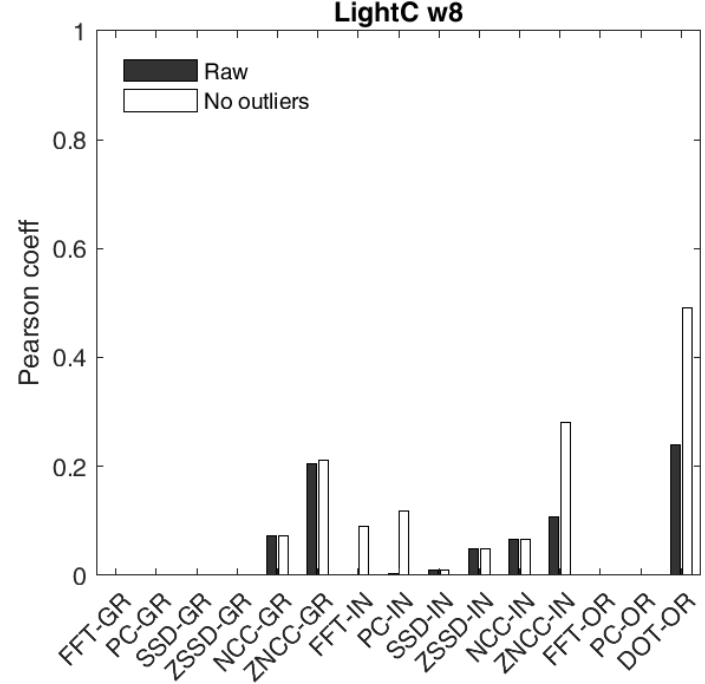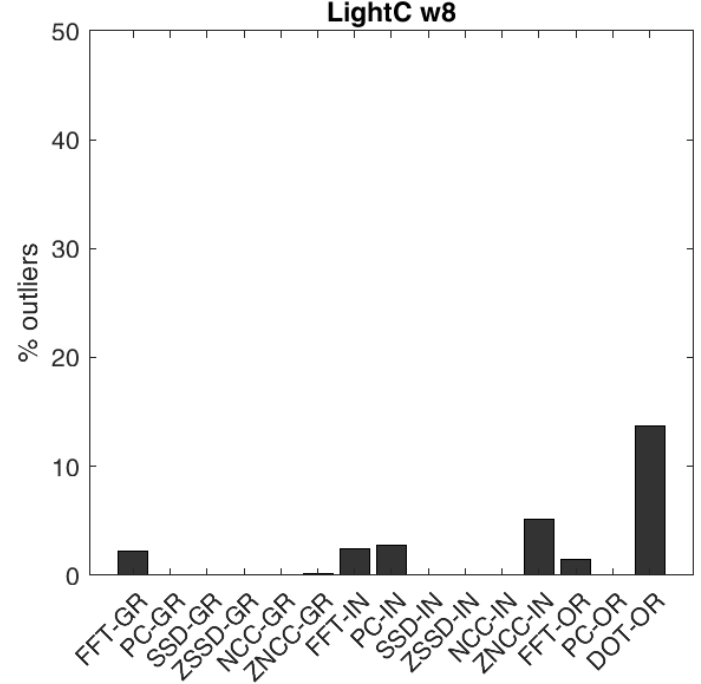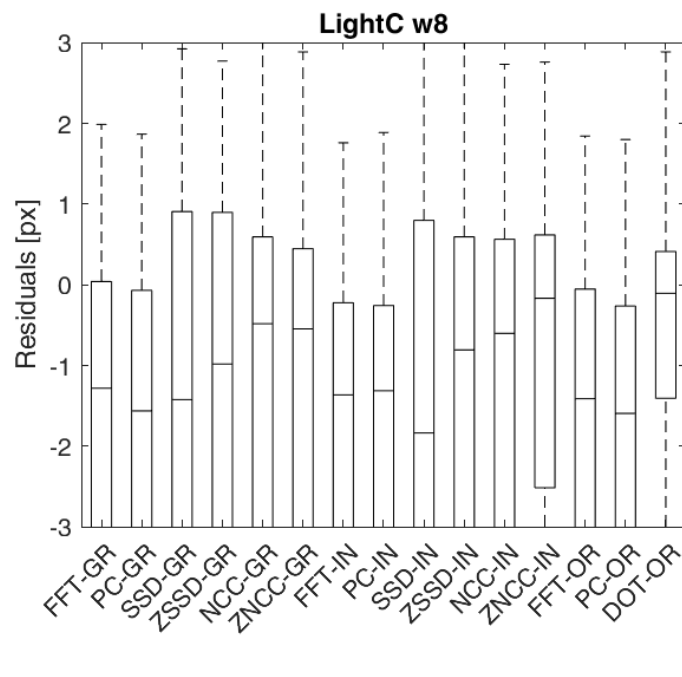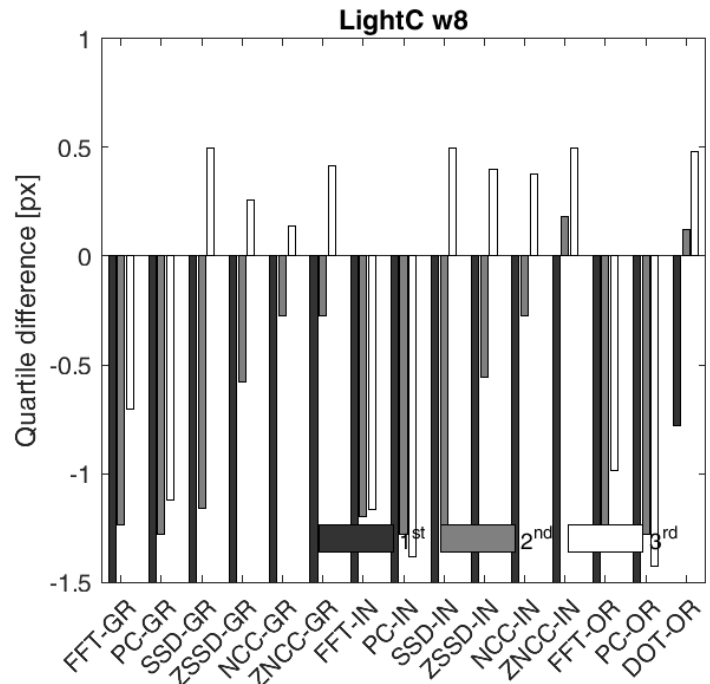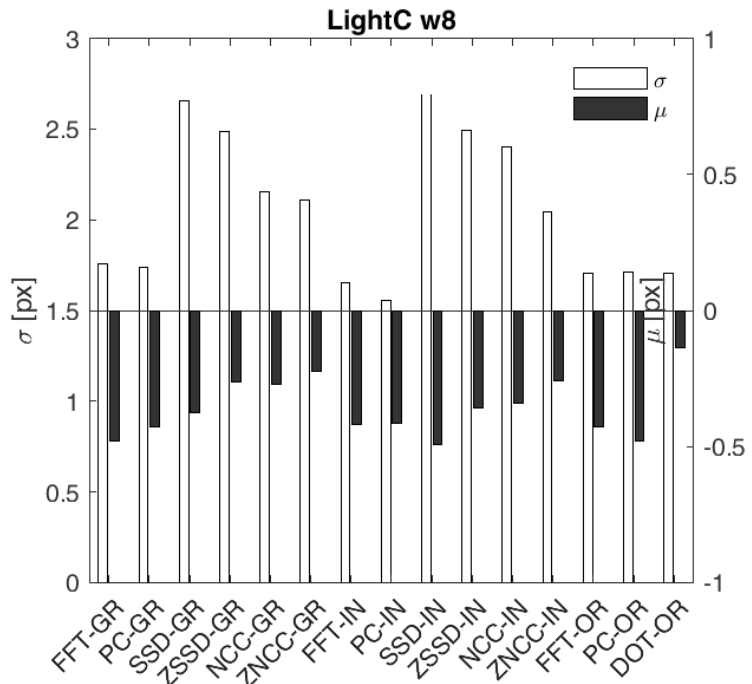

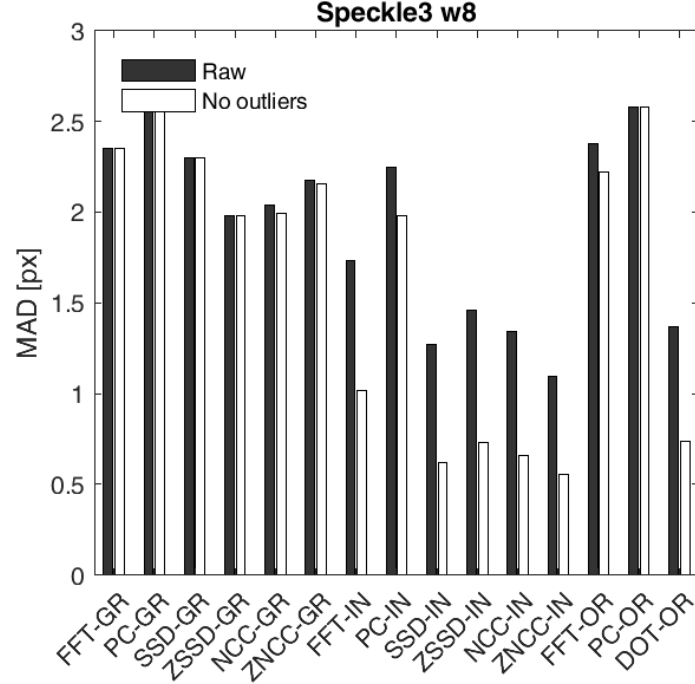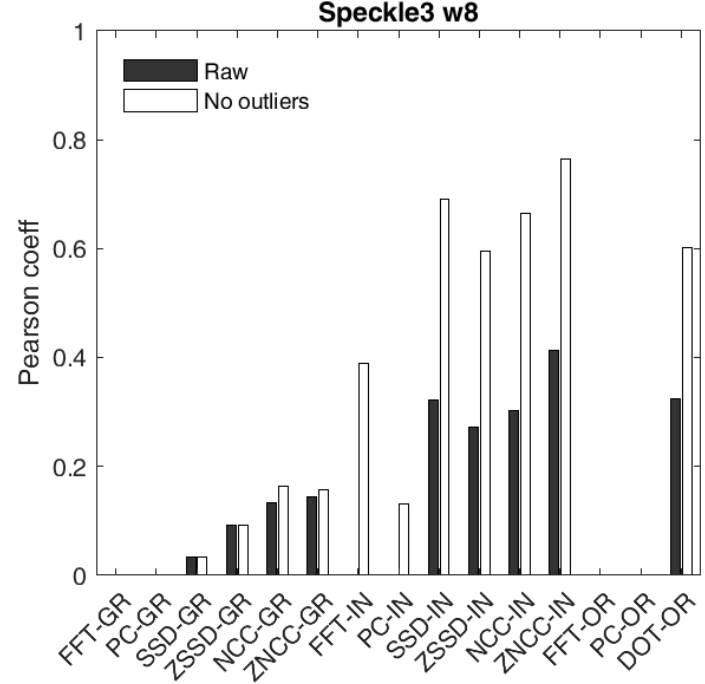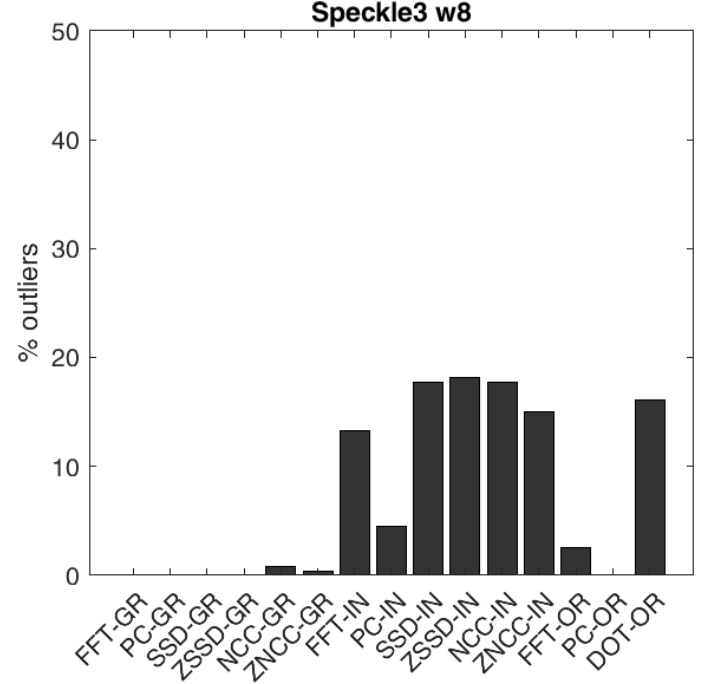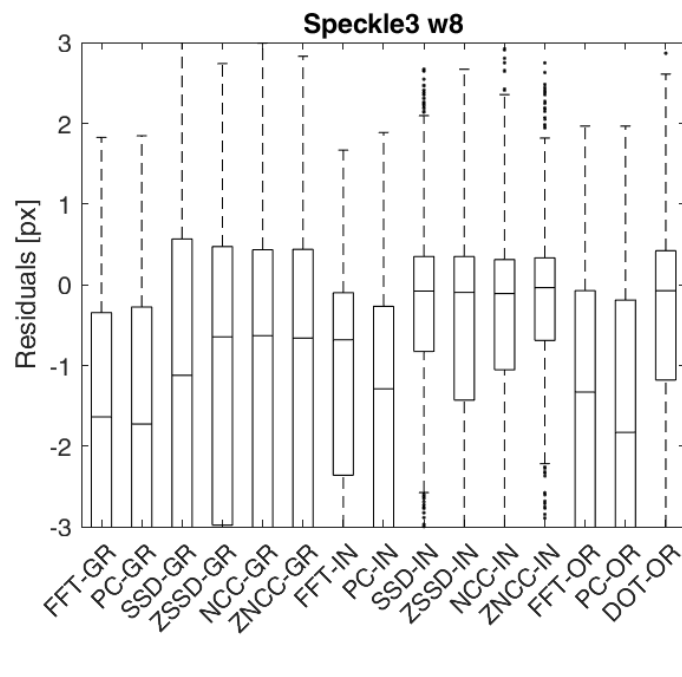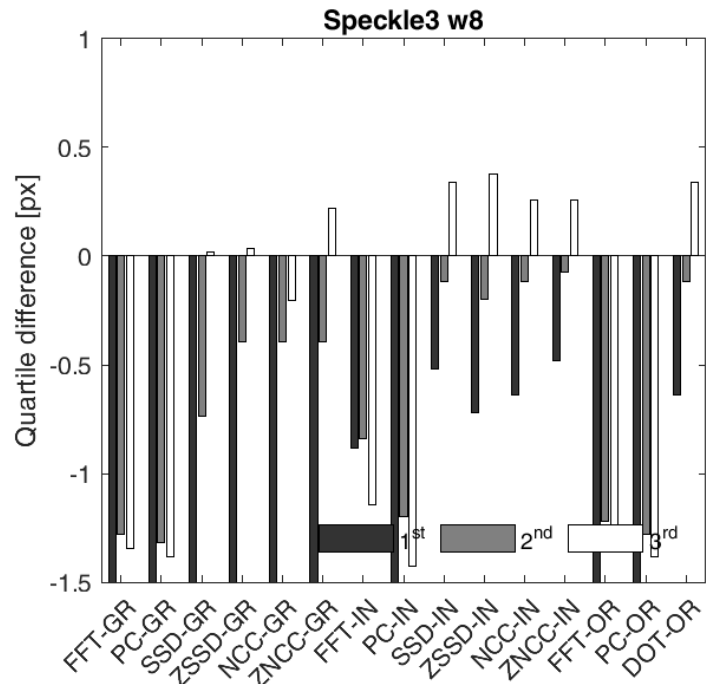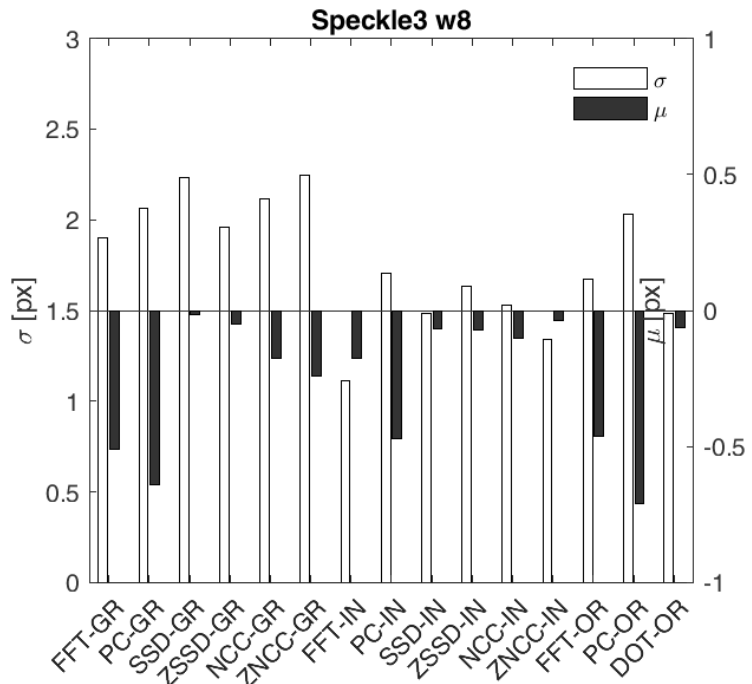

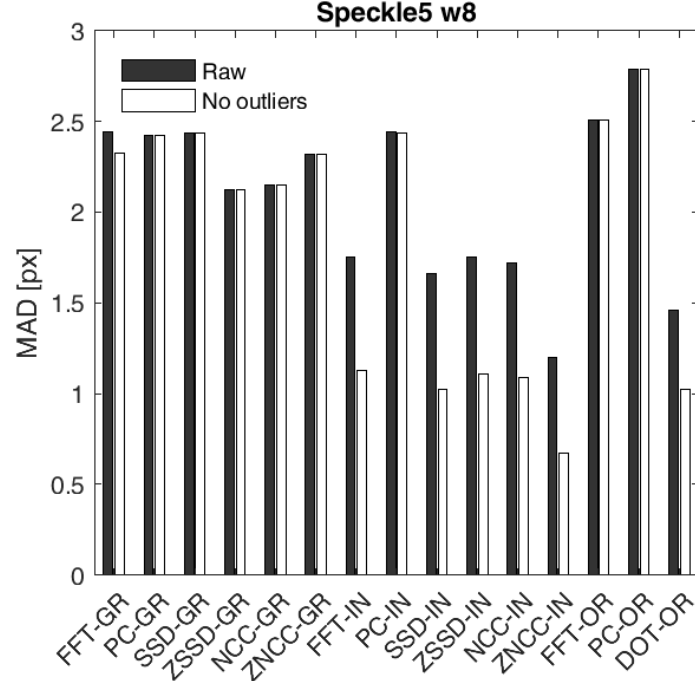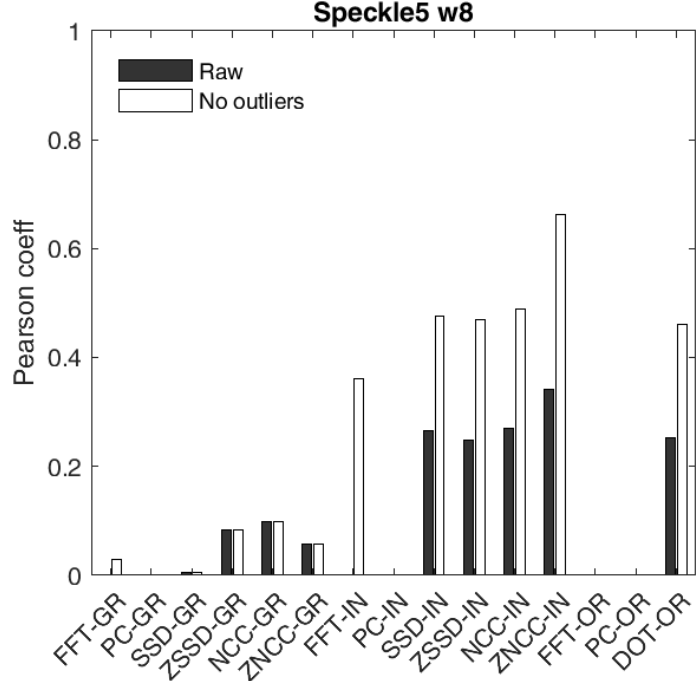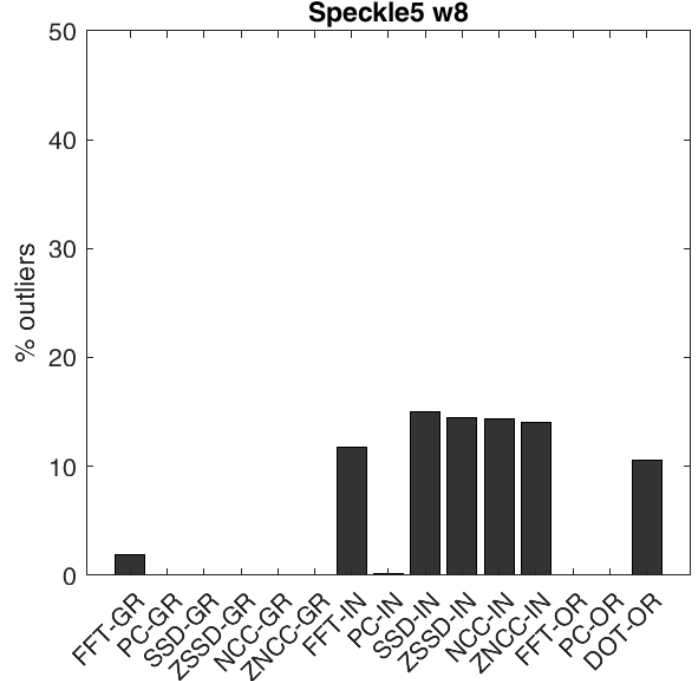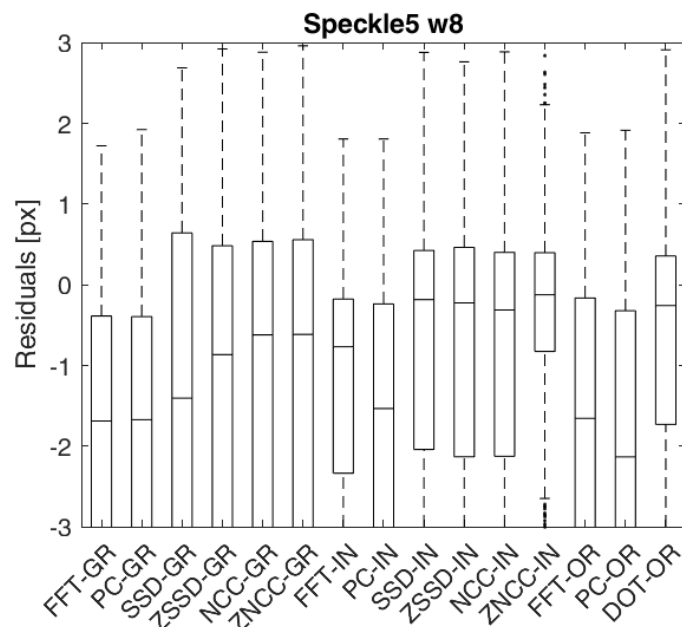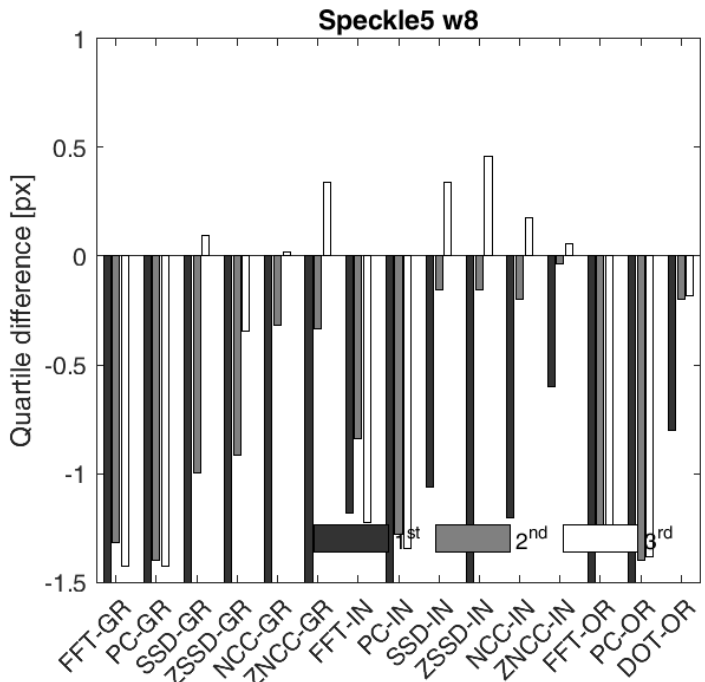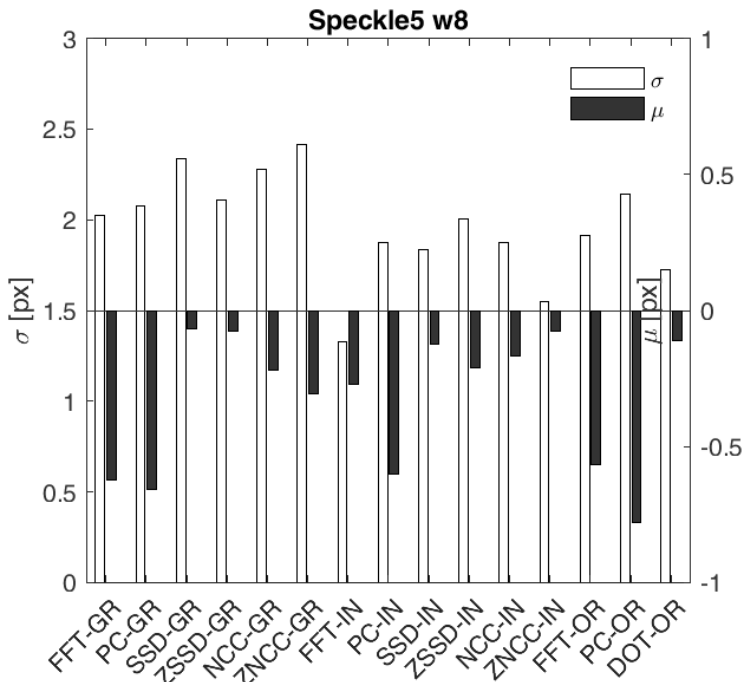

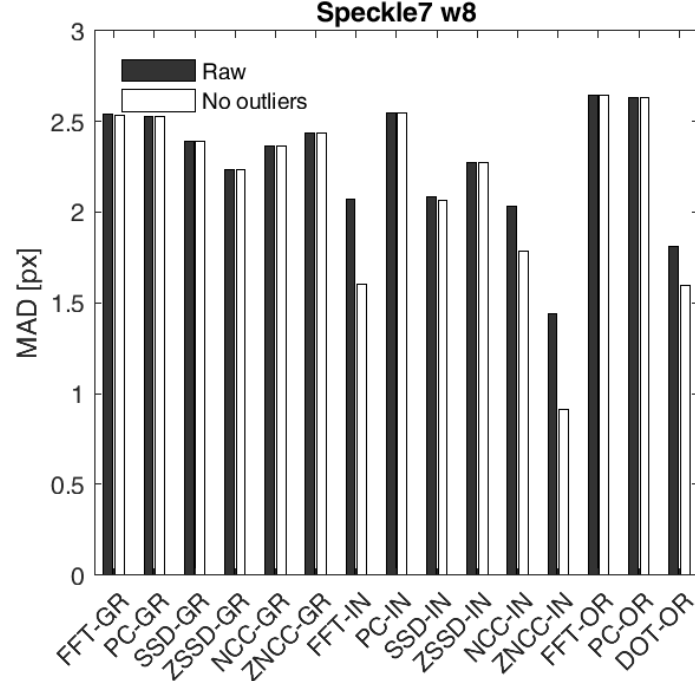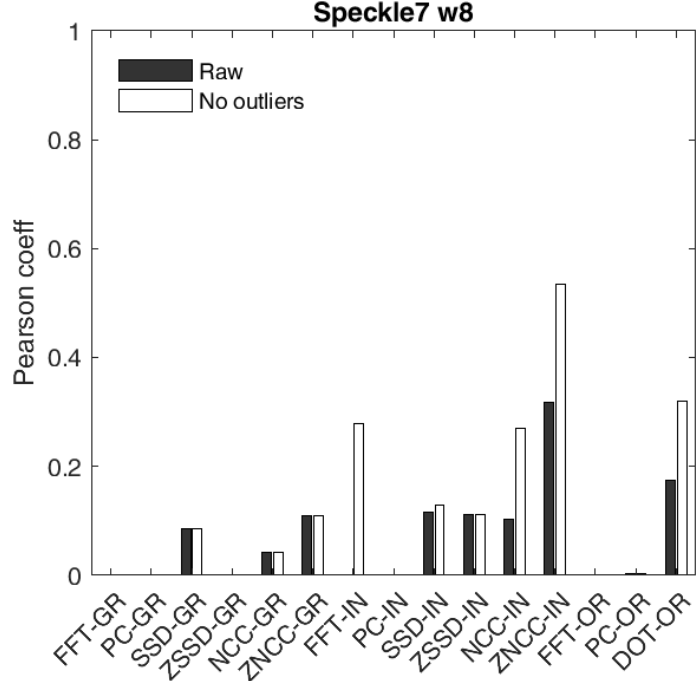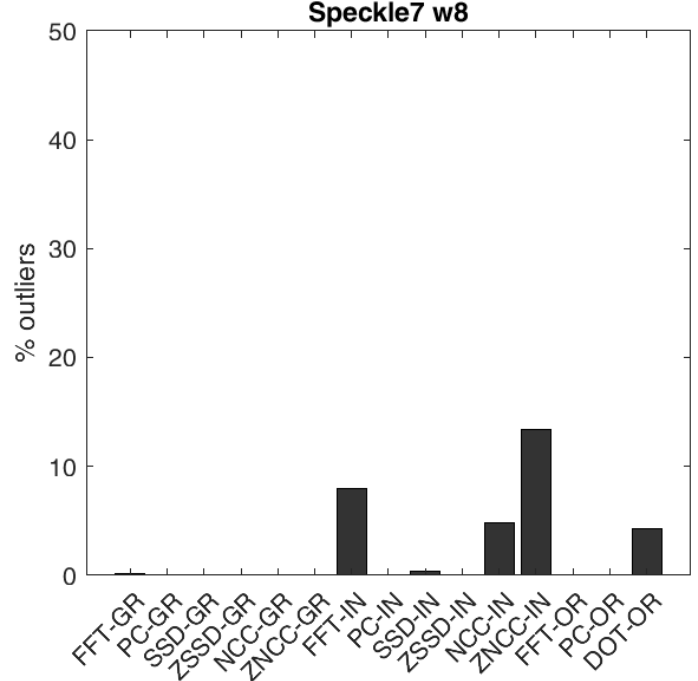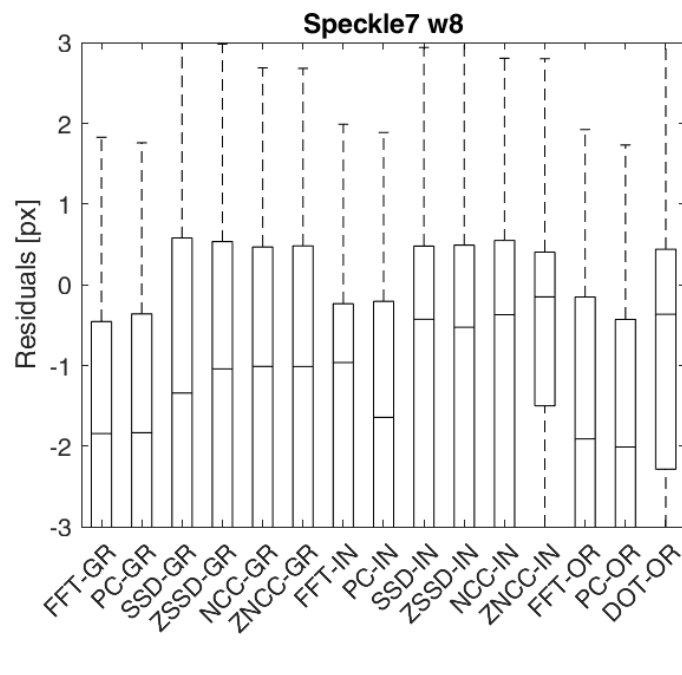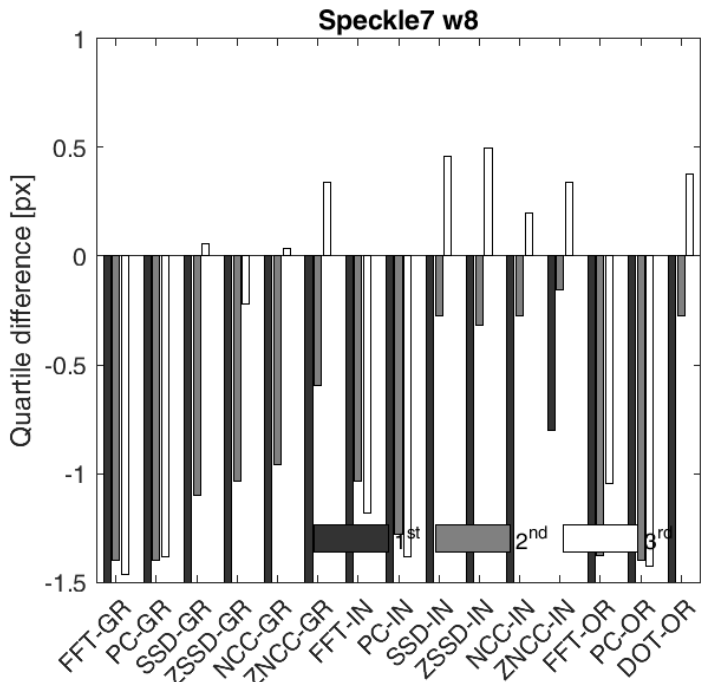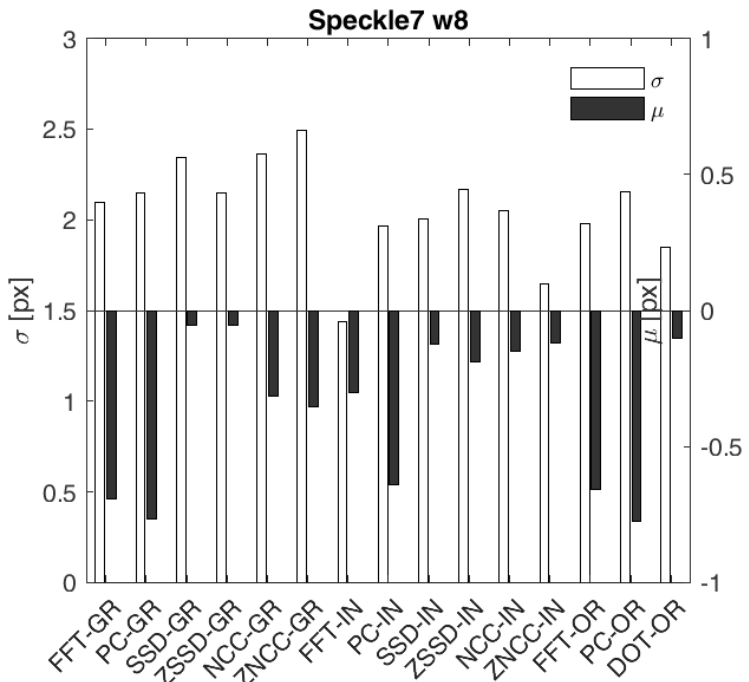

Template size 16x16

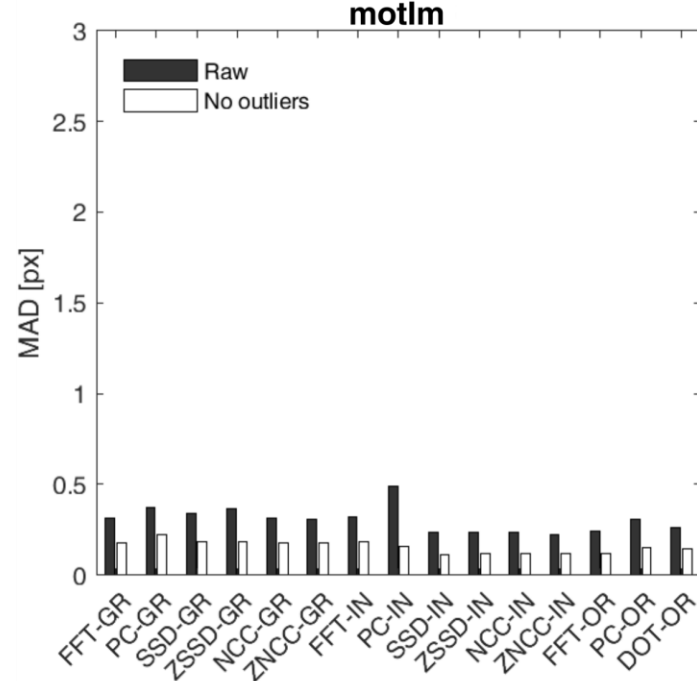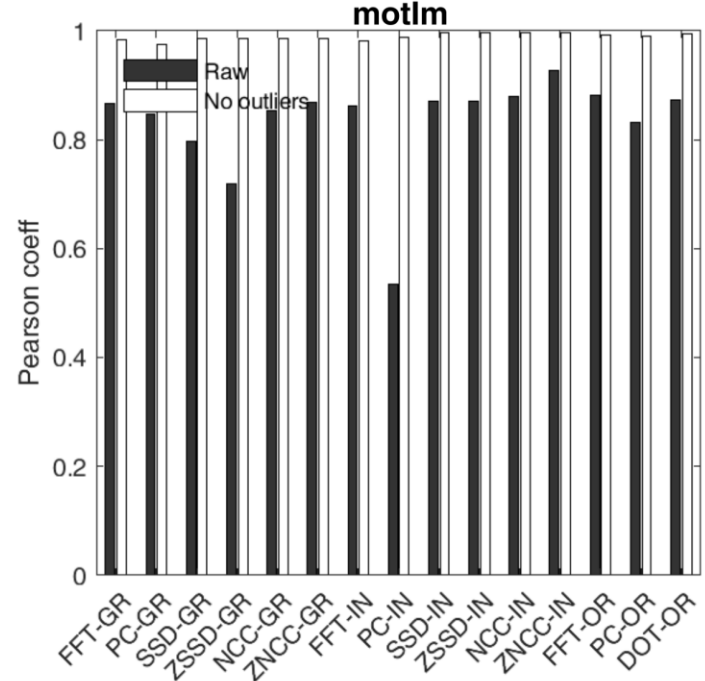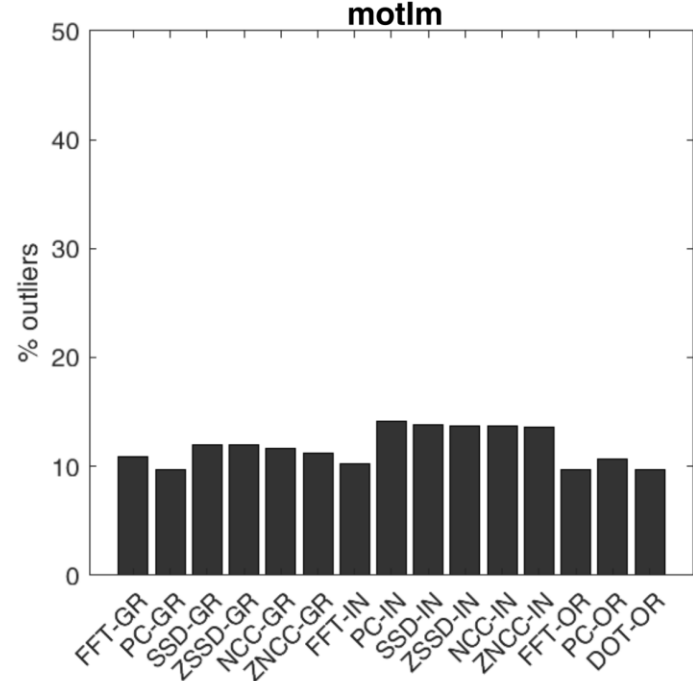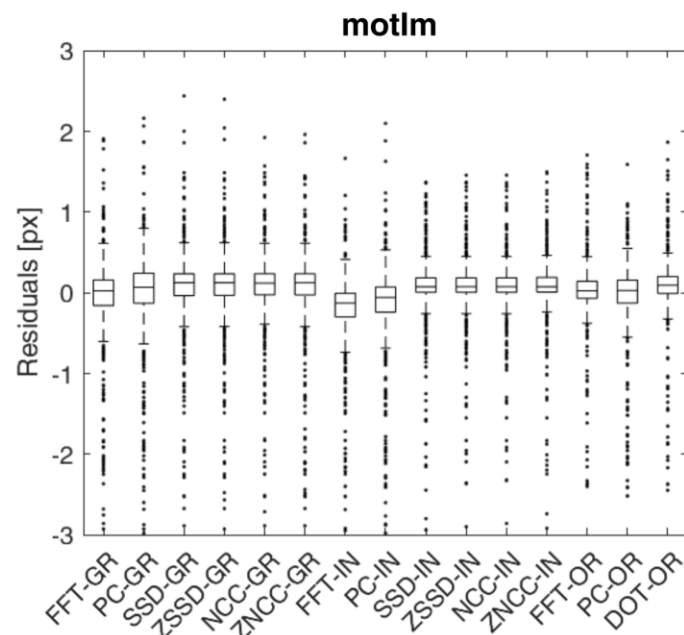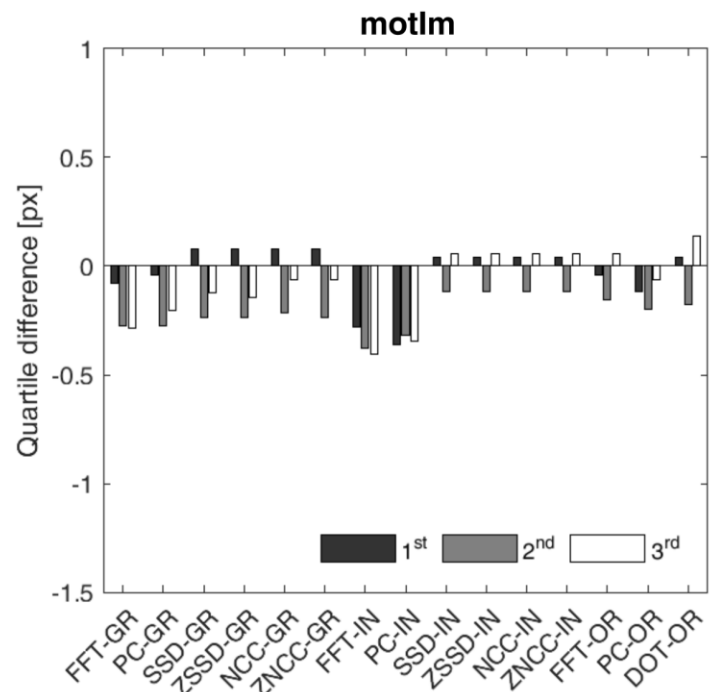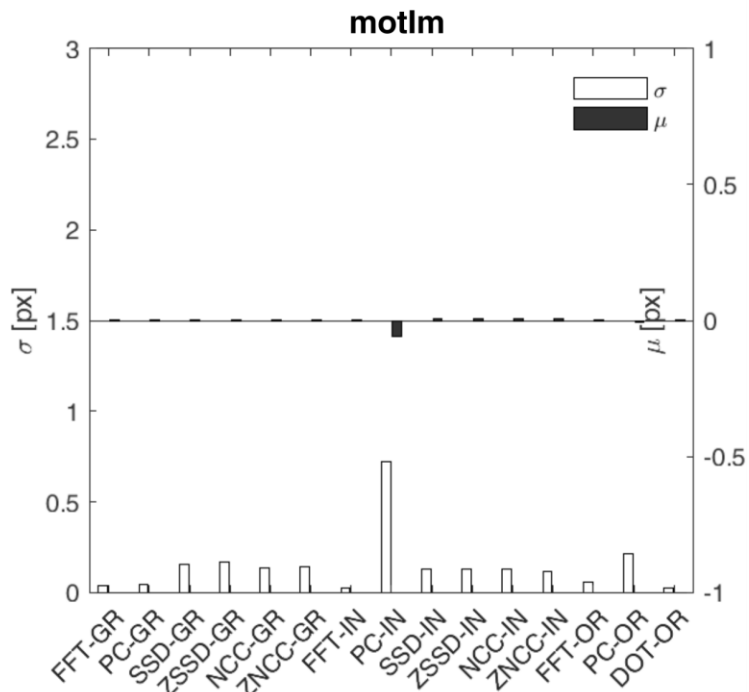



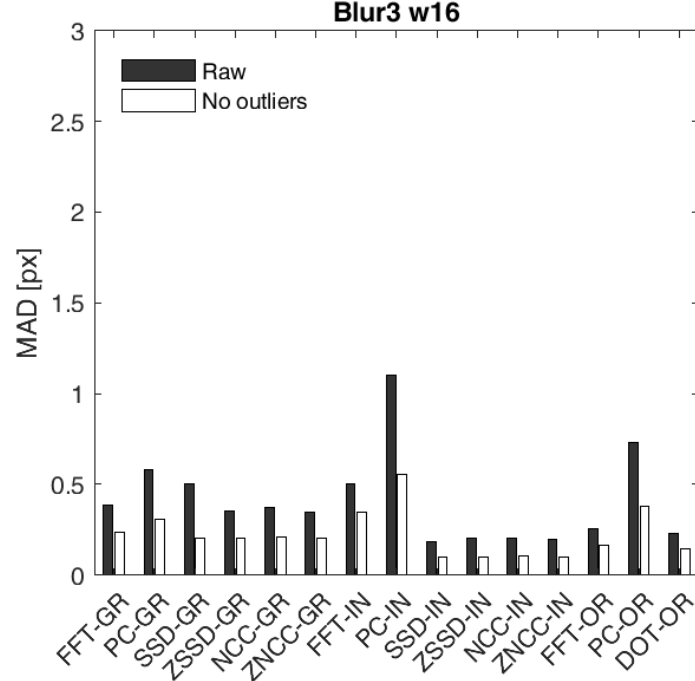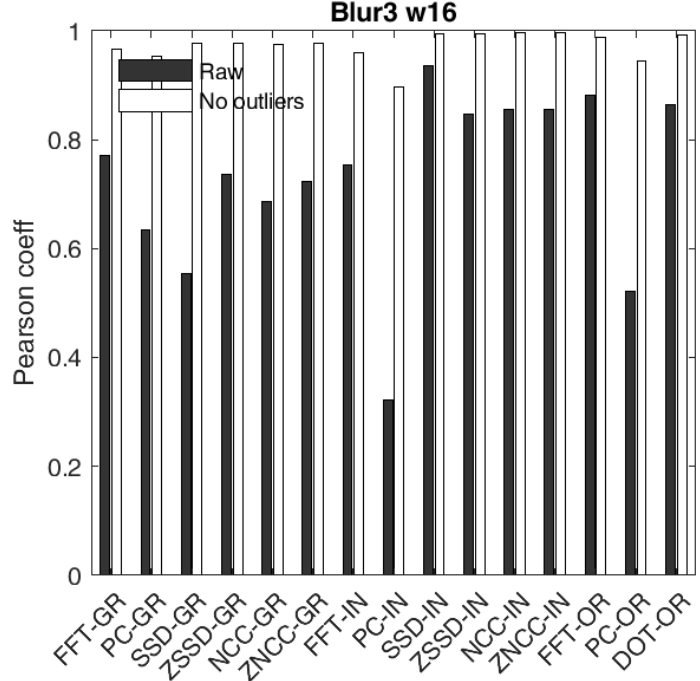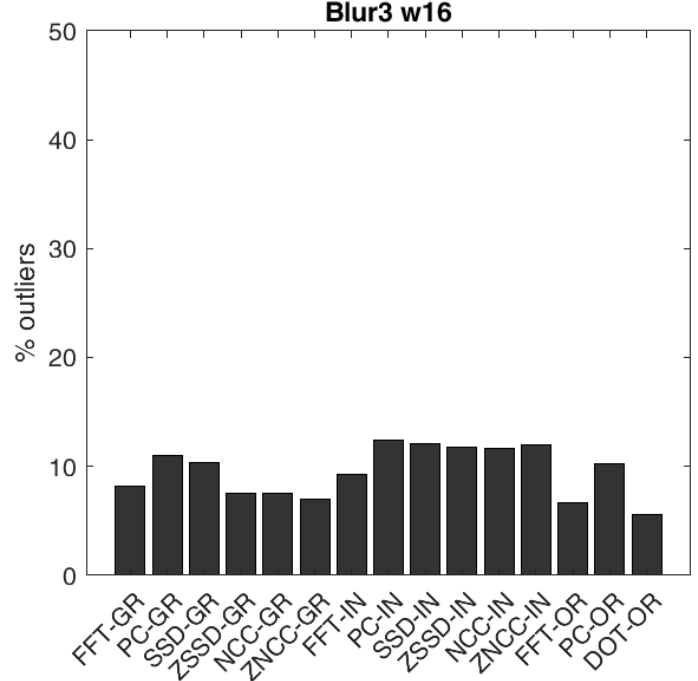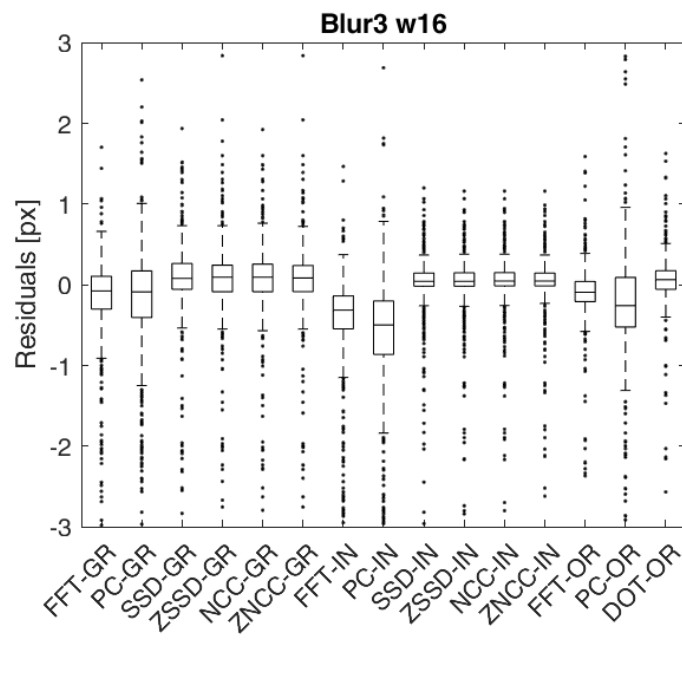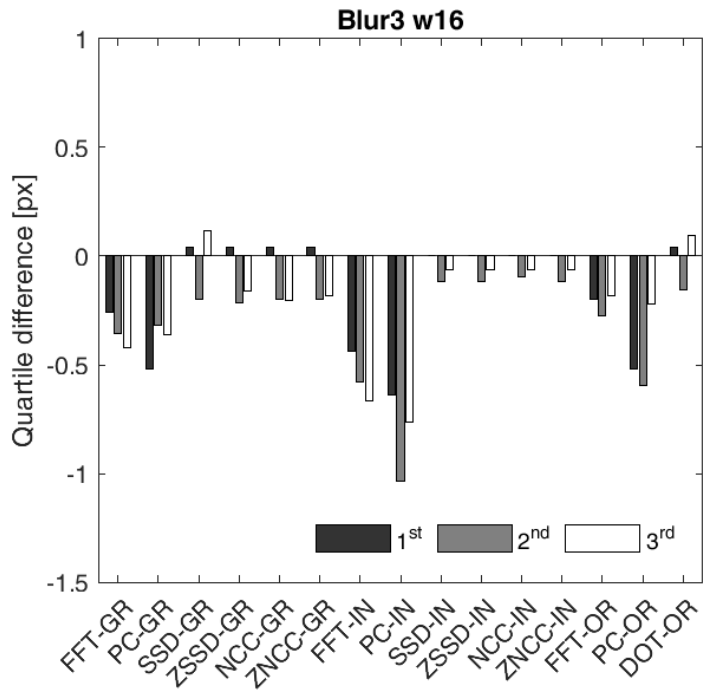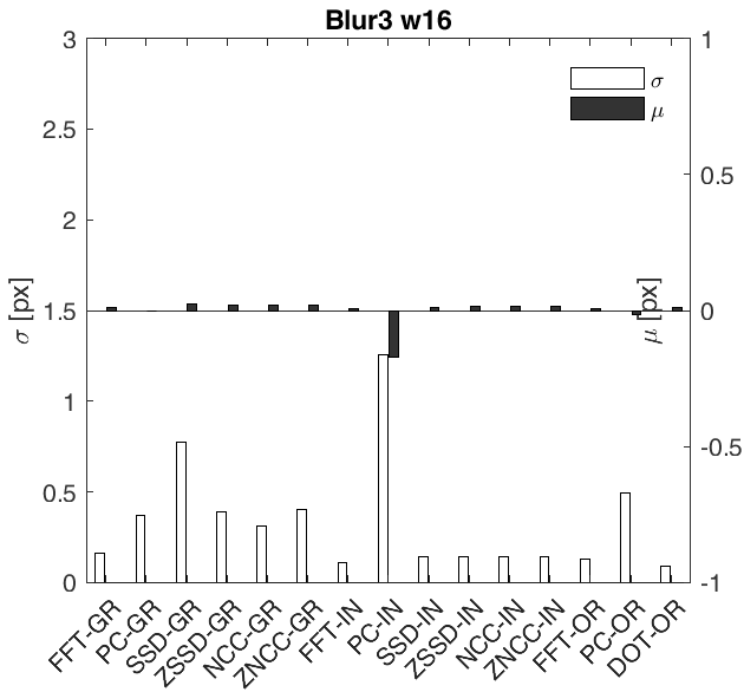

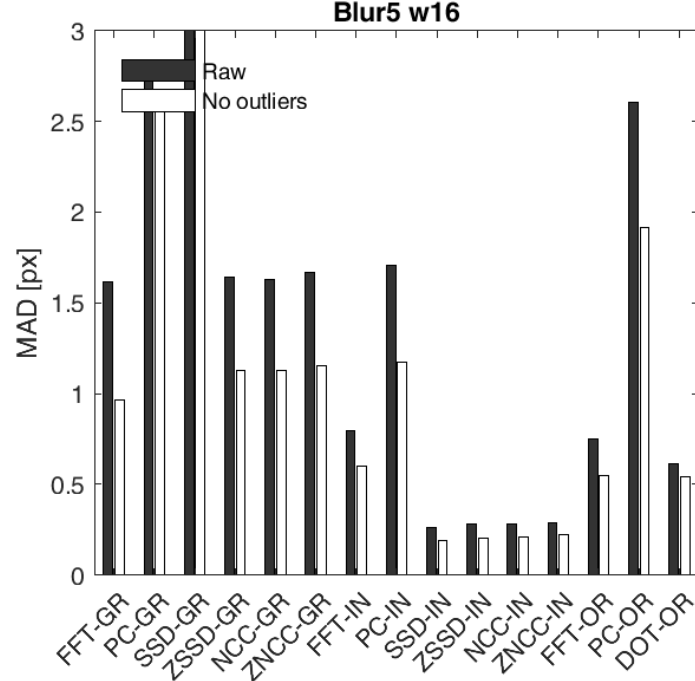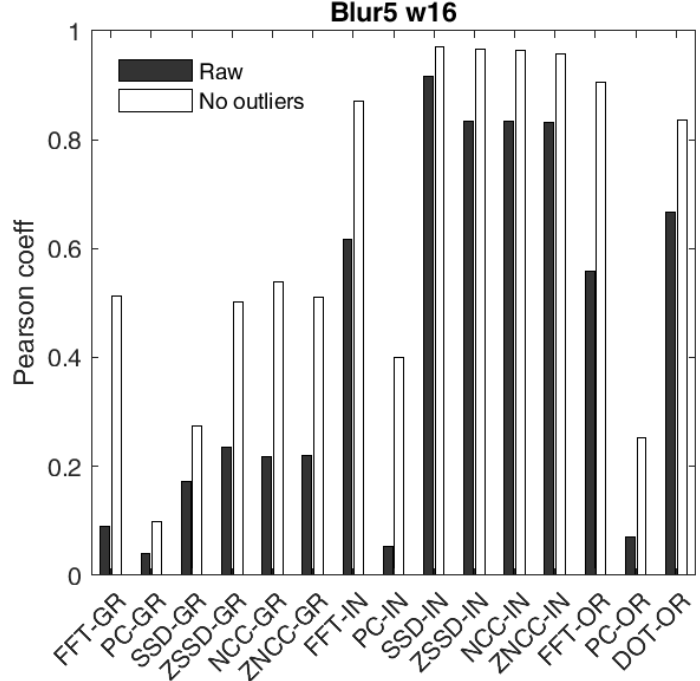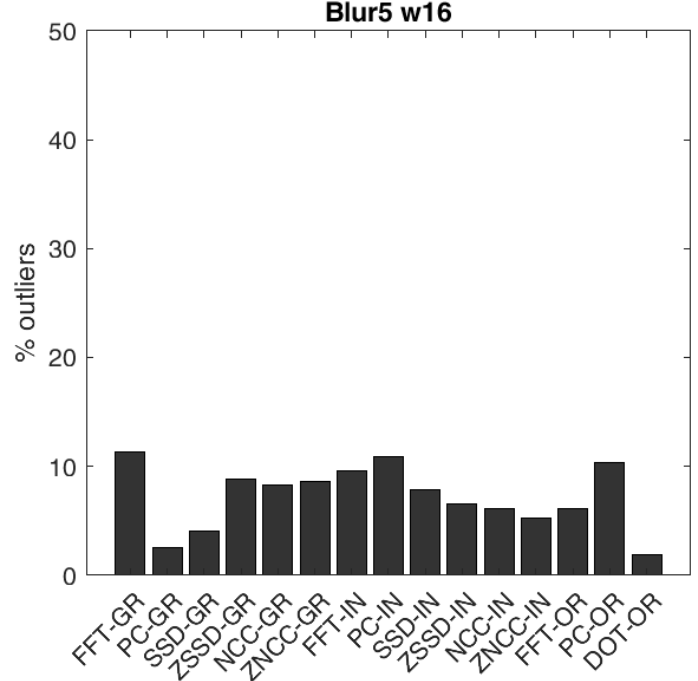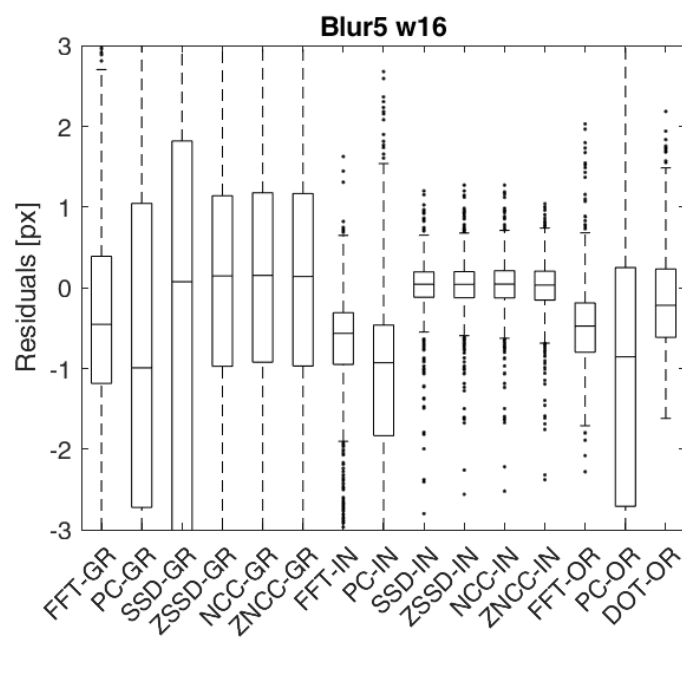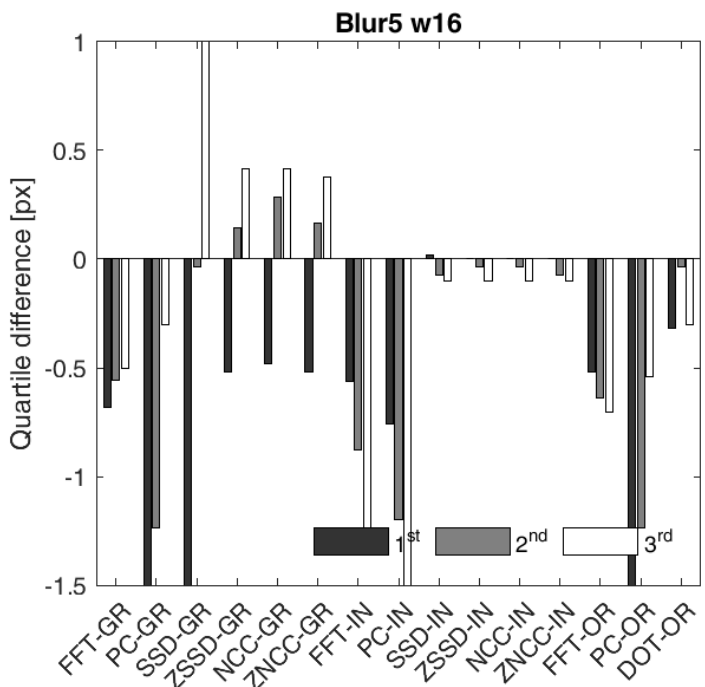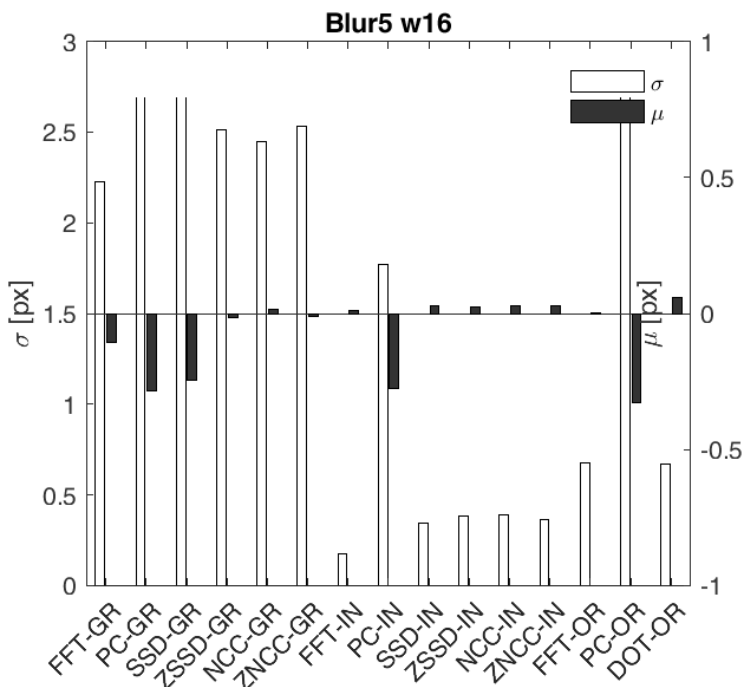

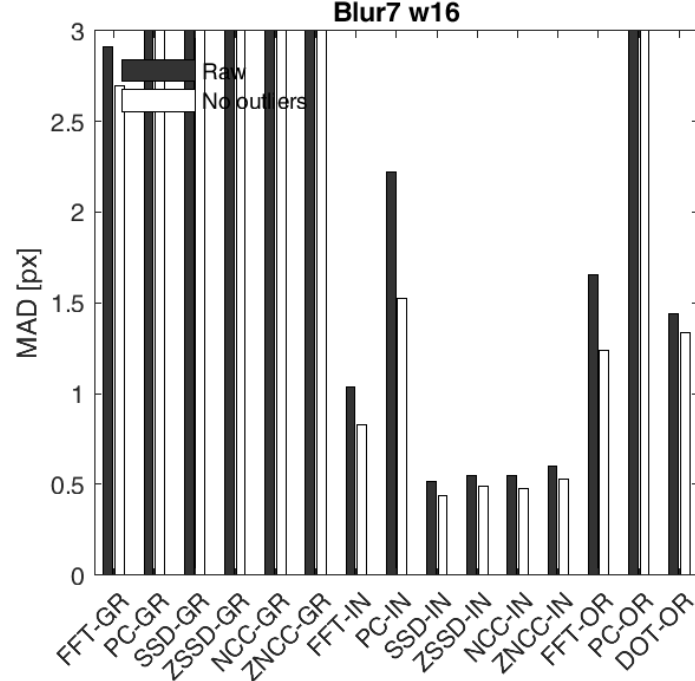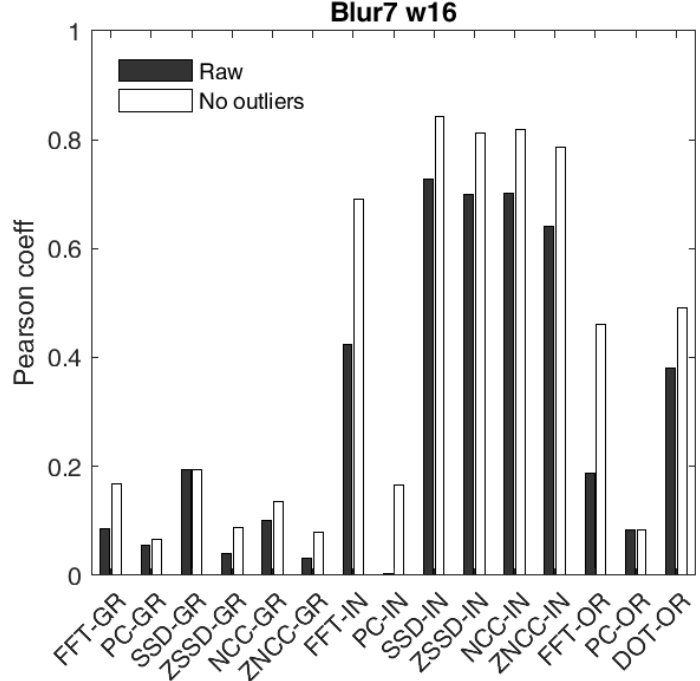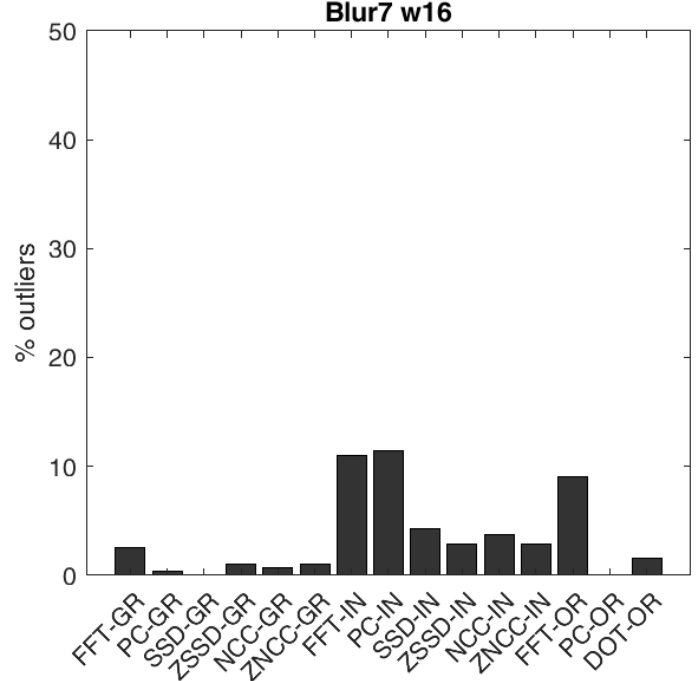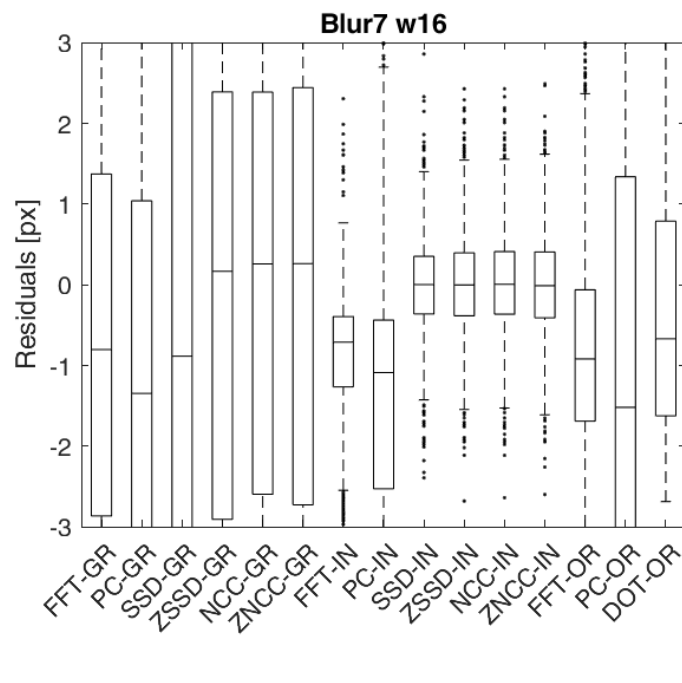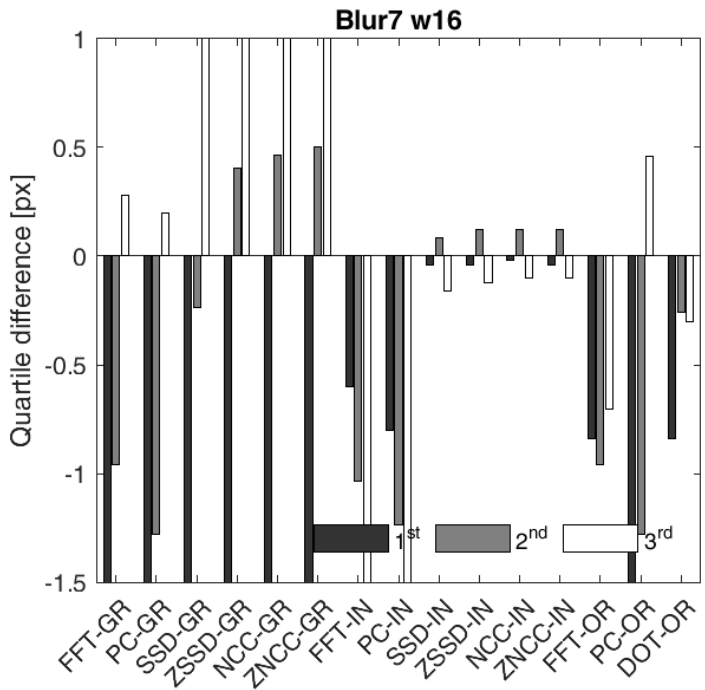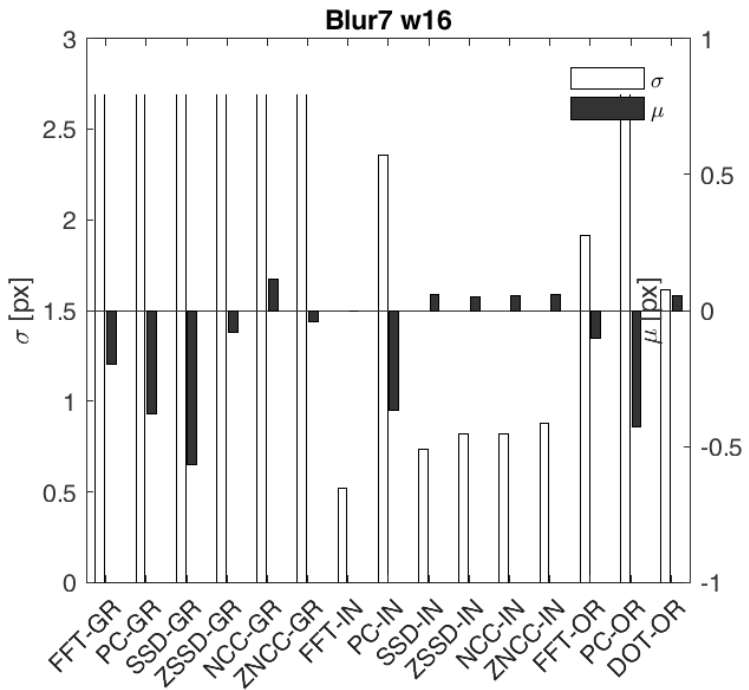

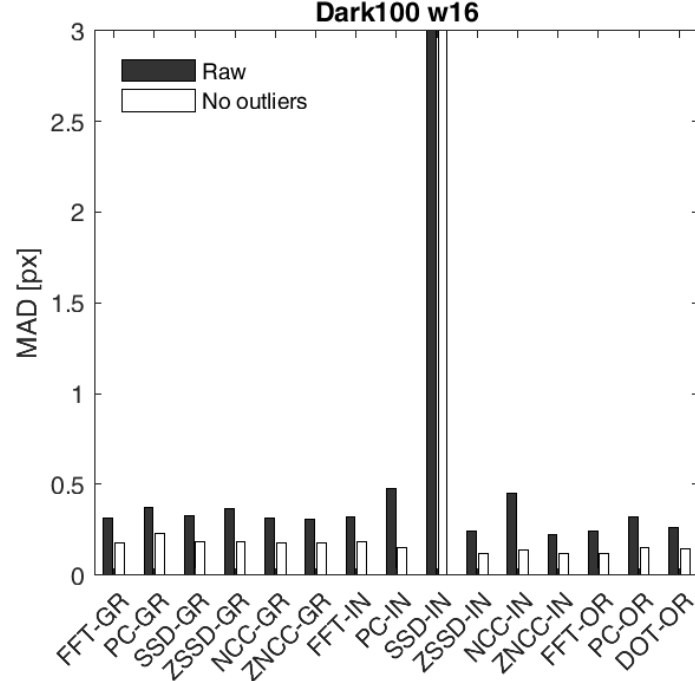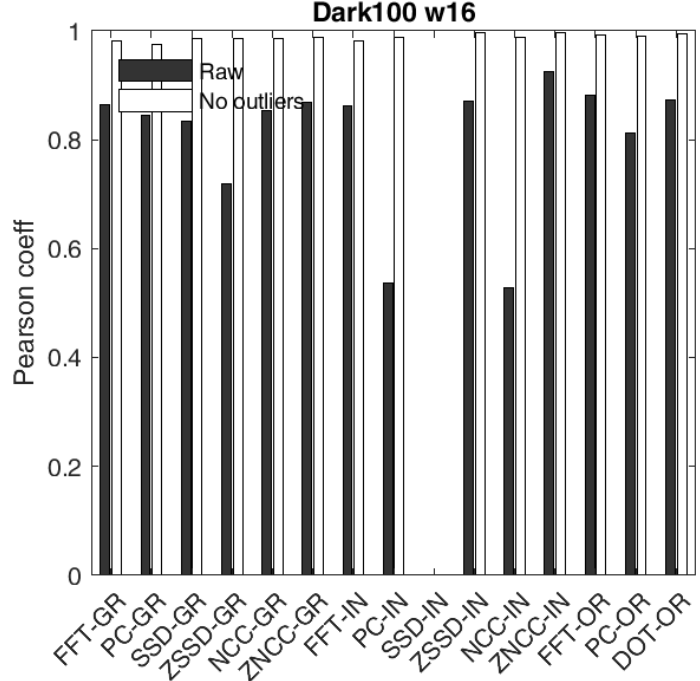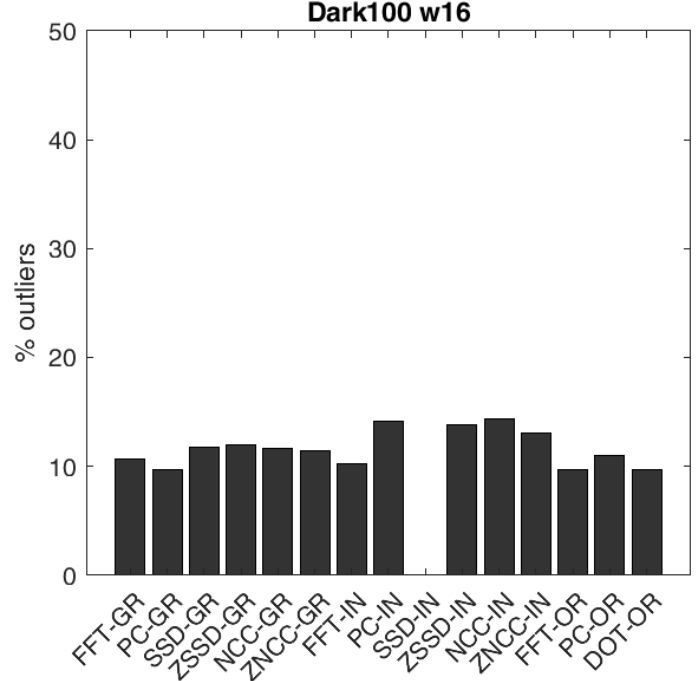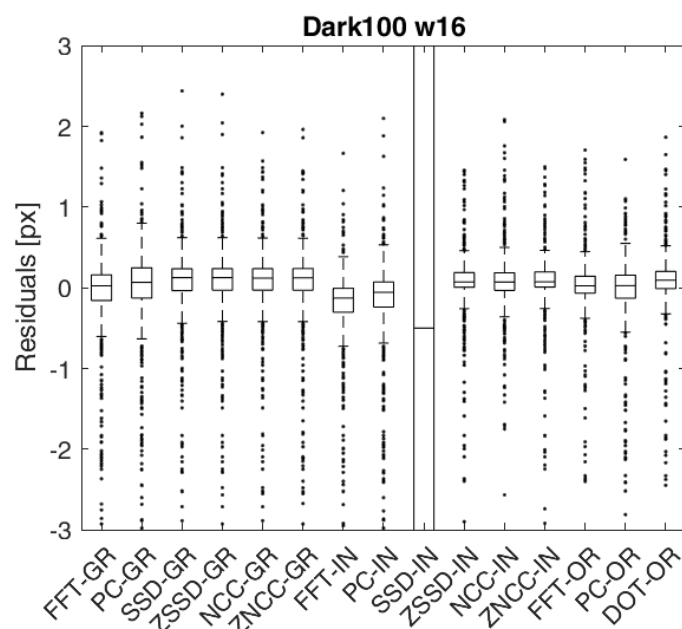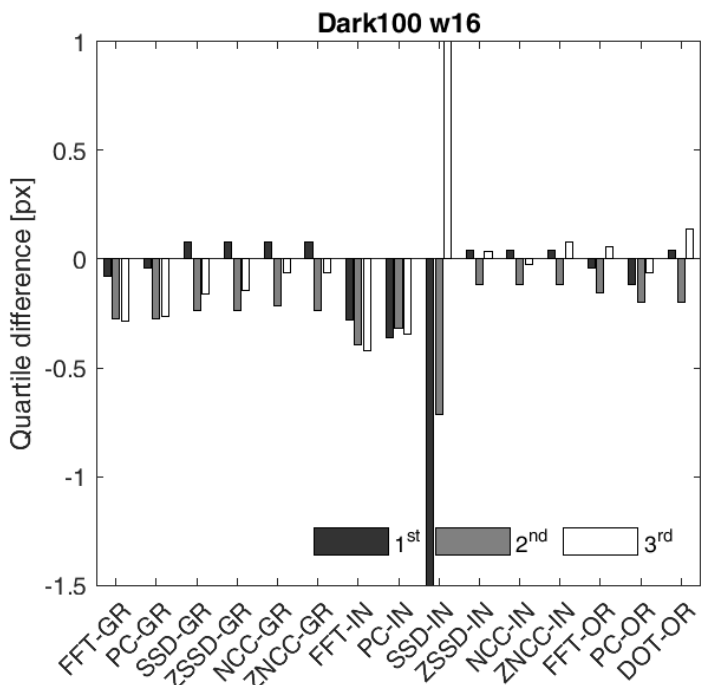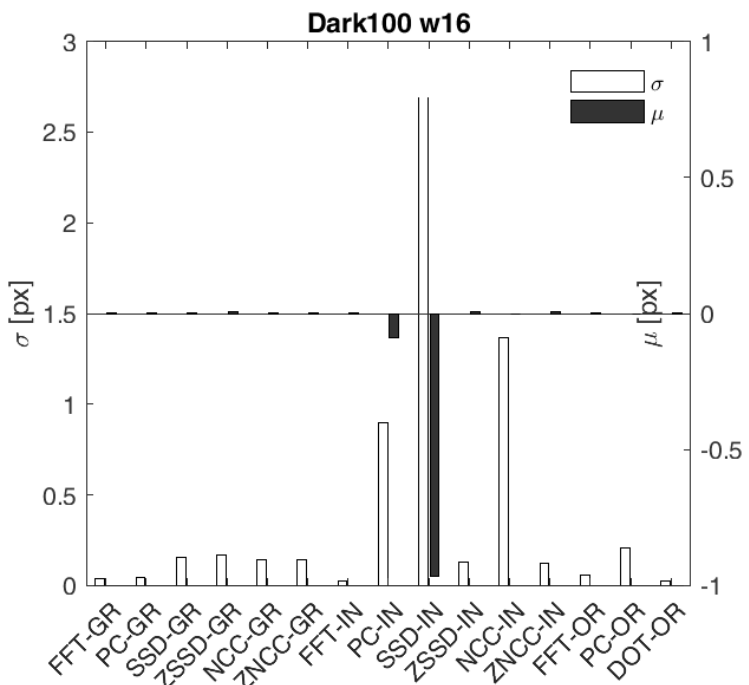

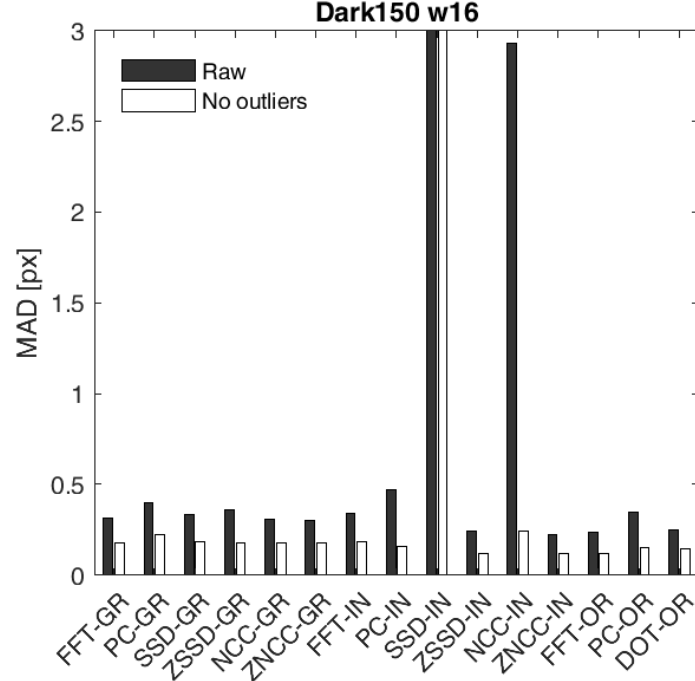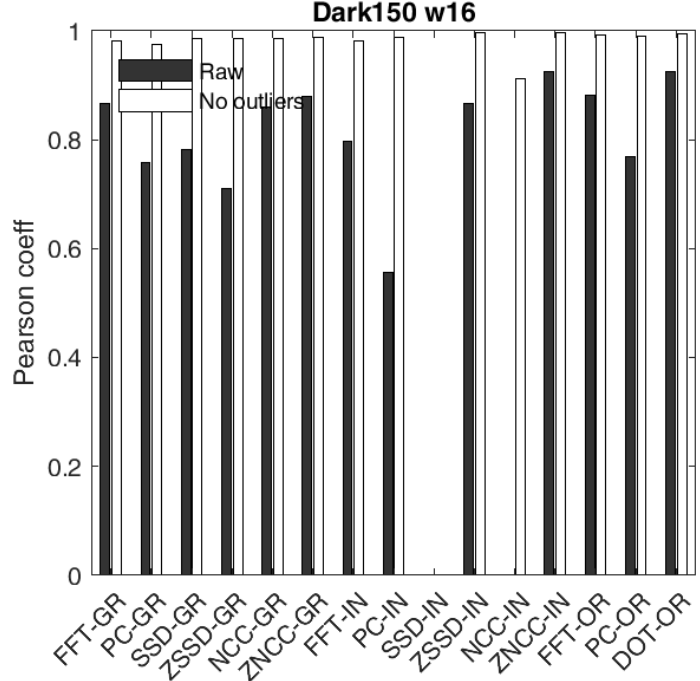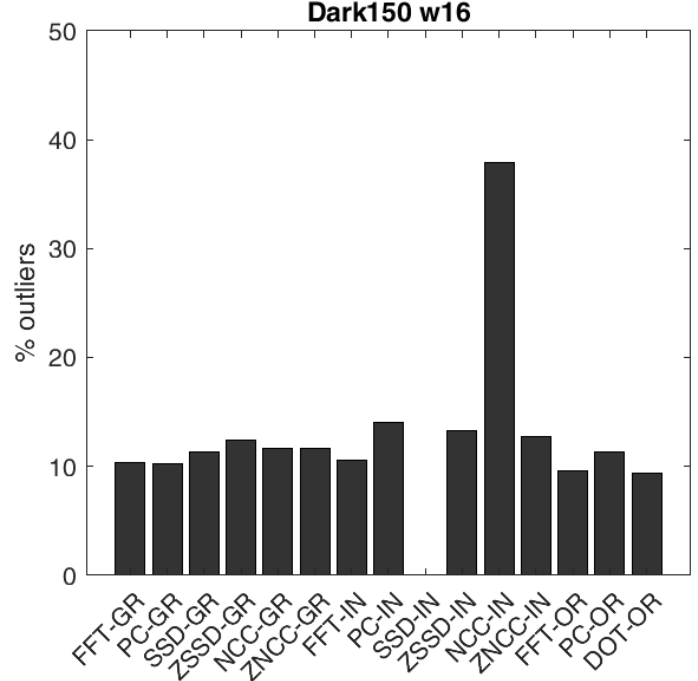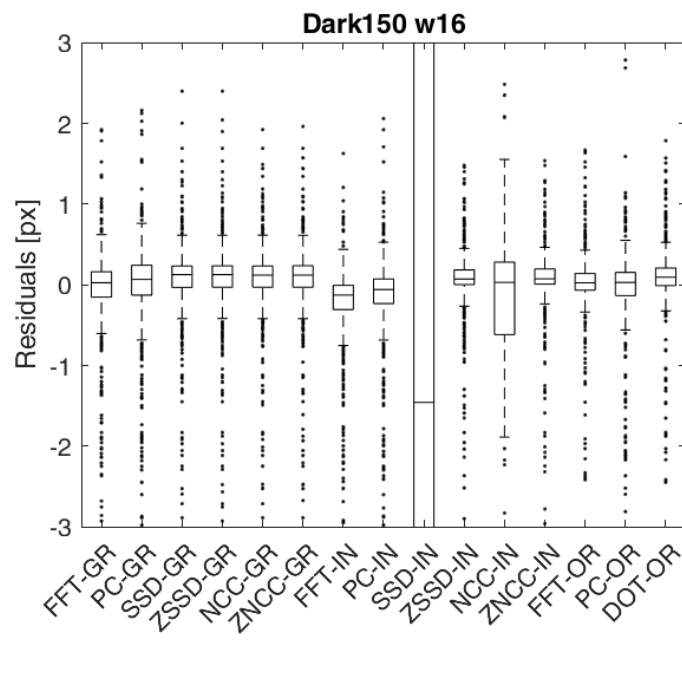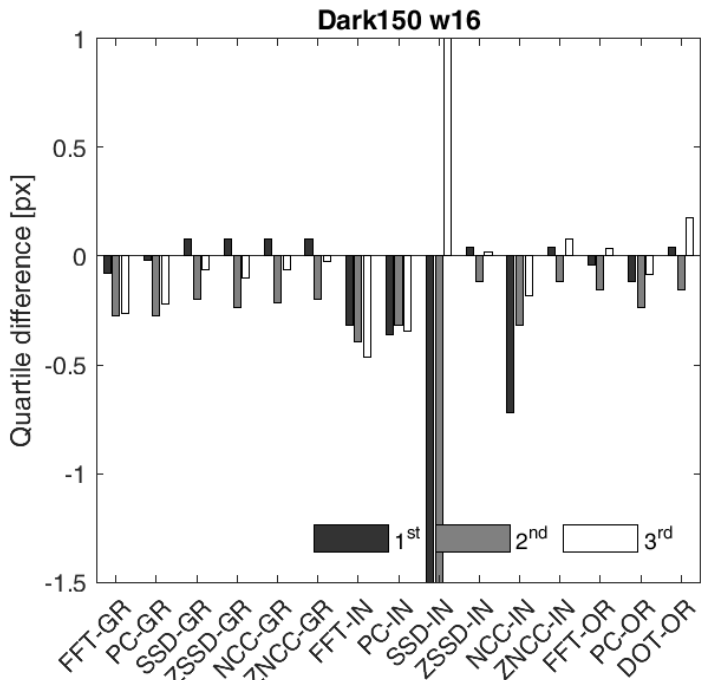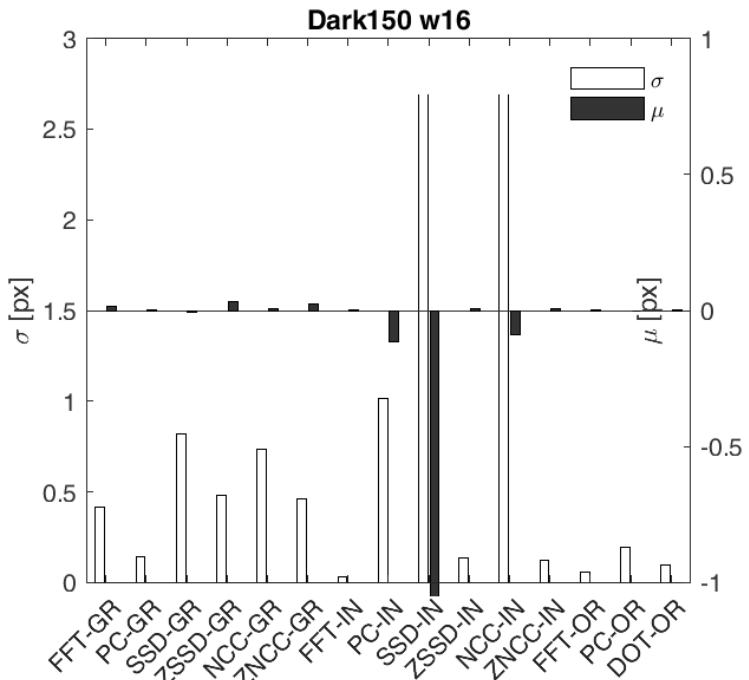

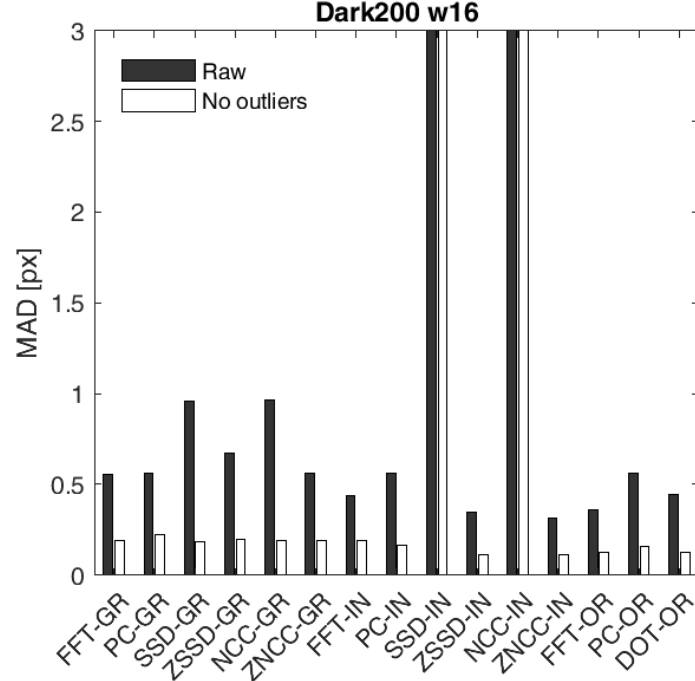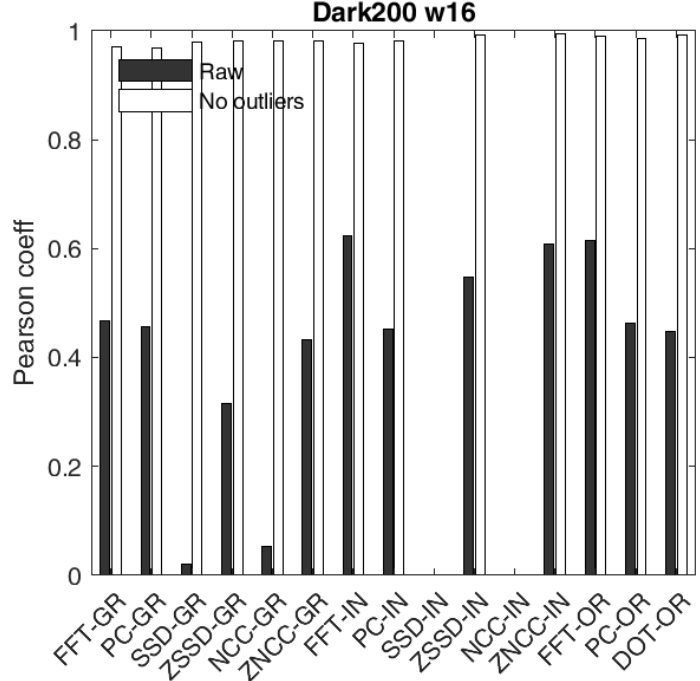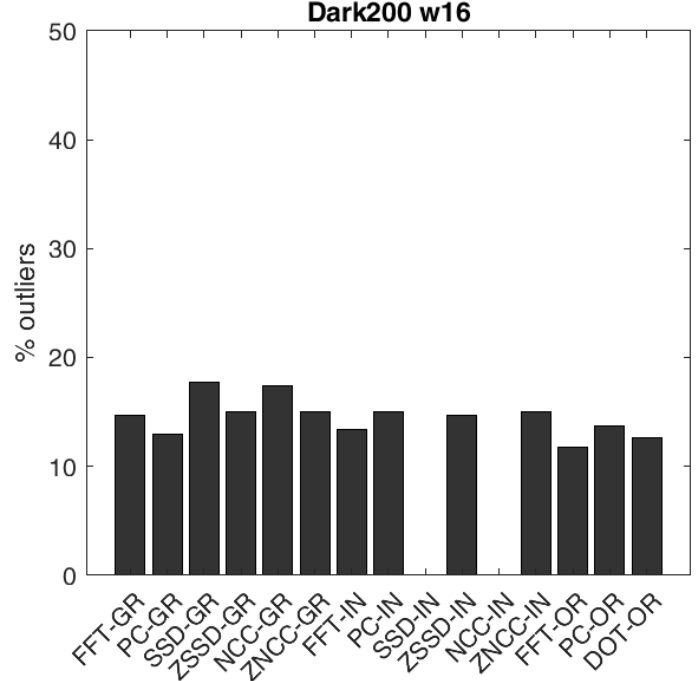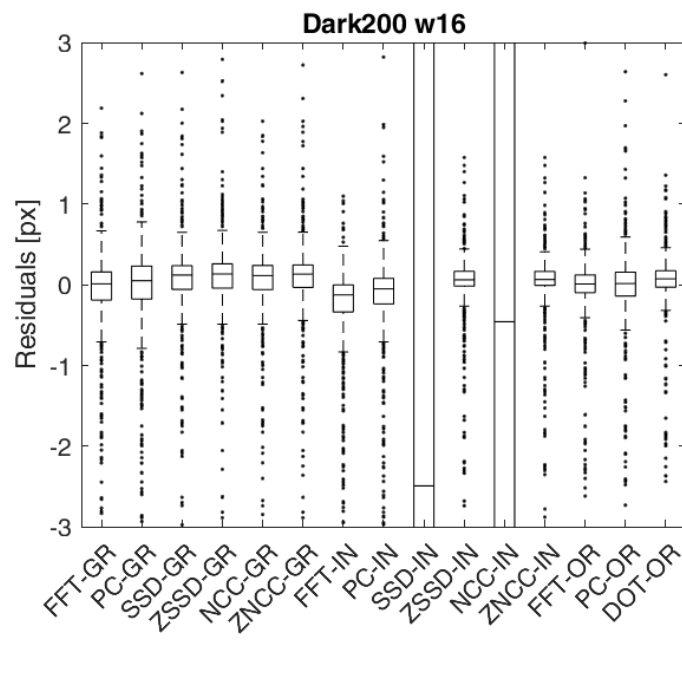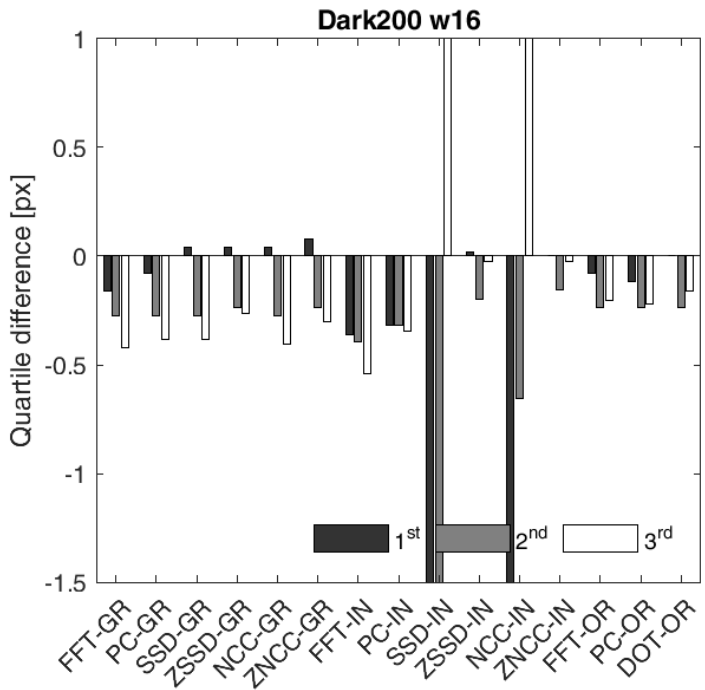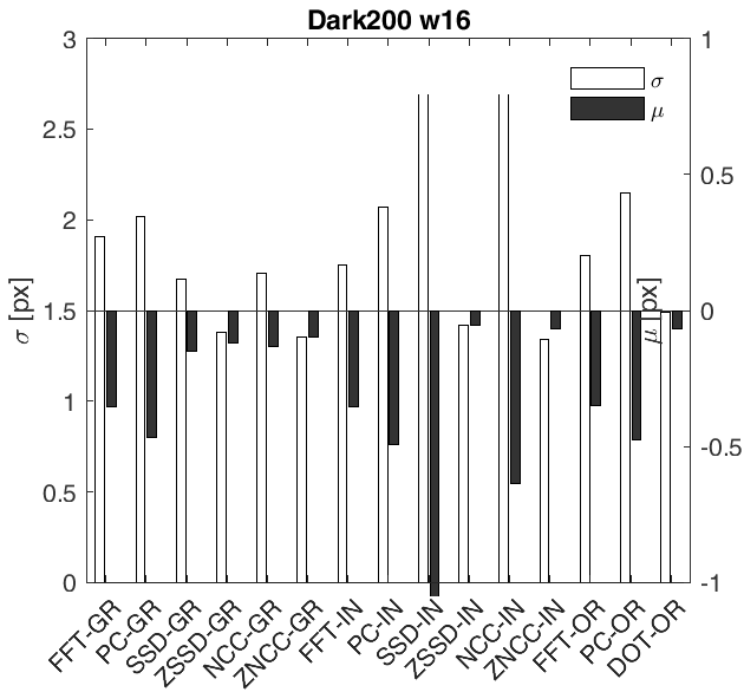

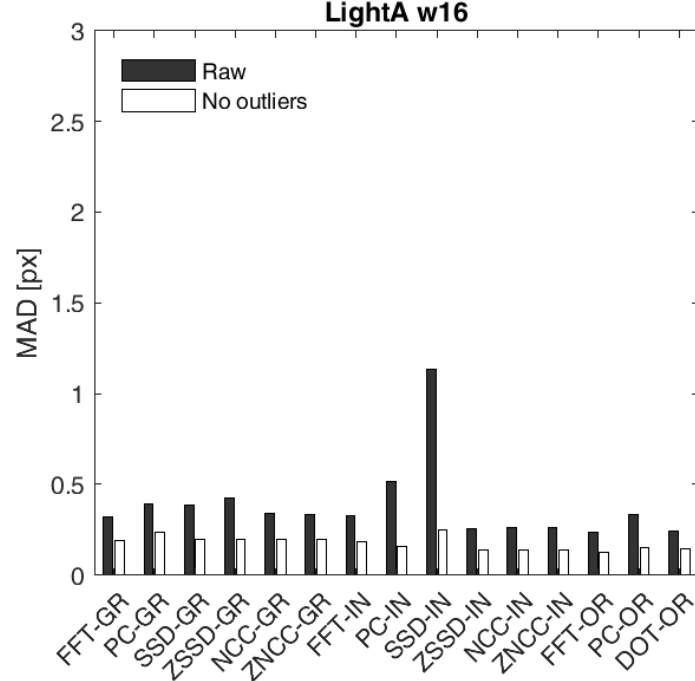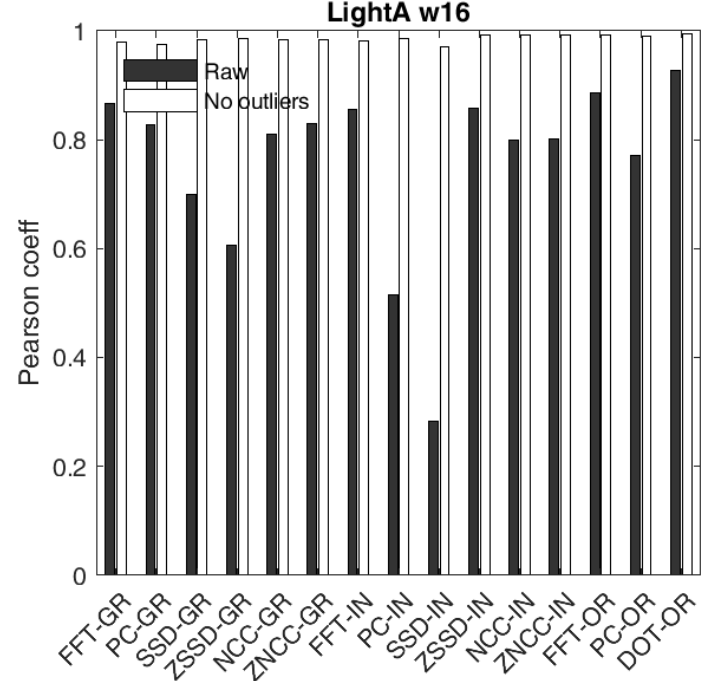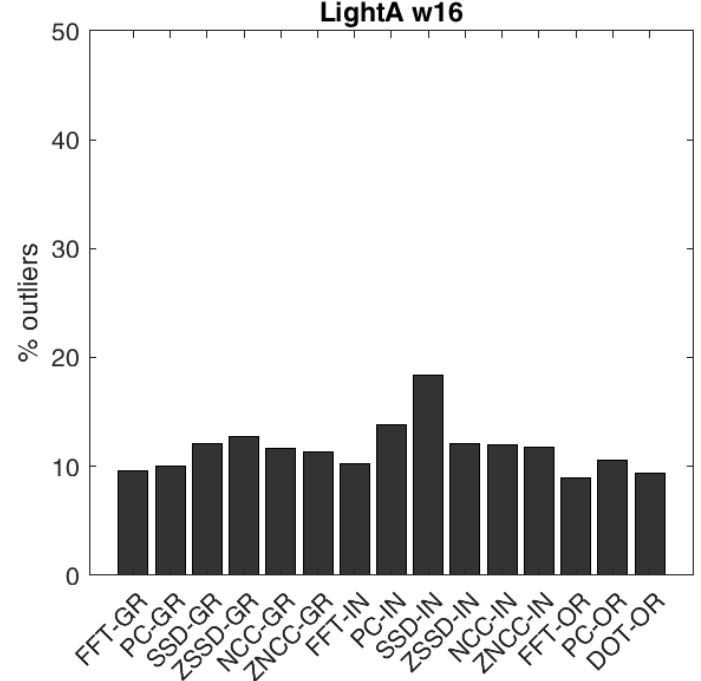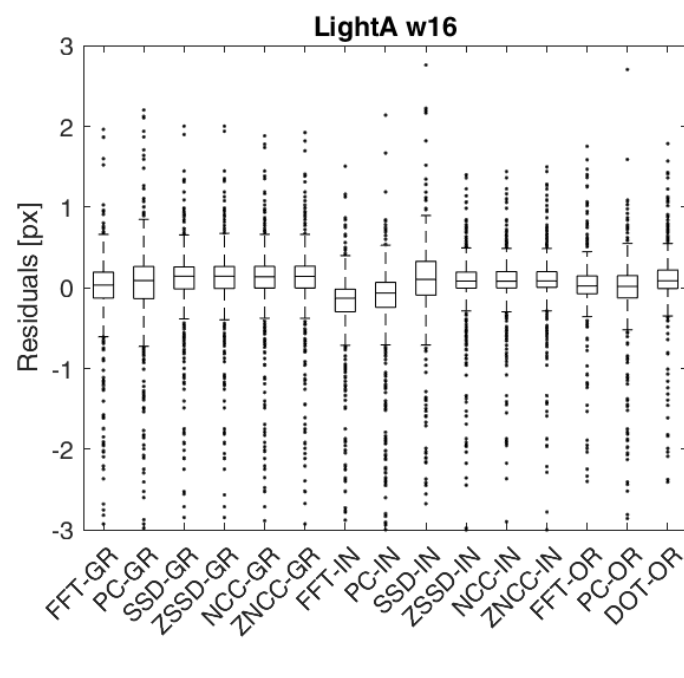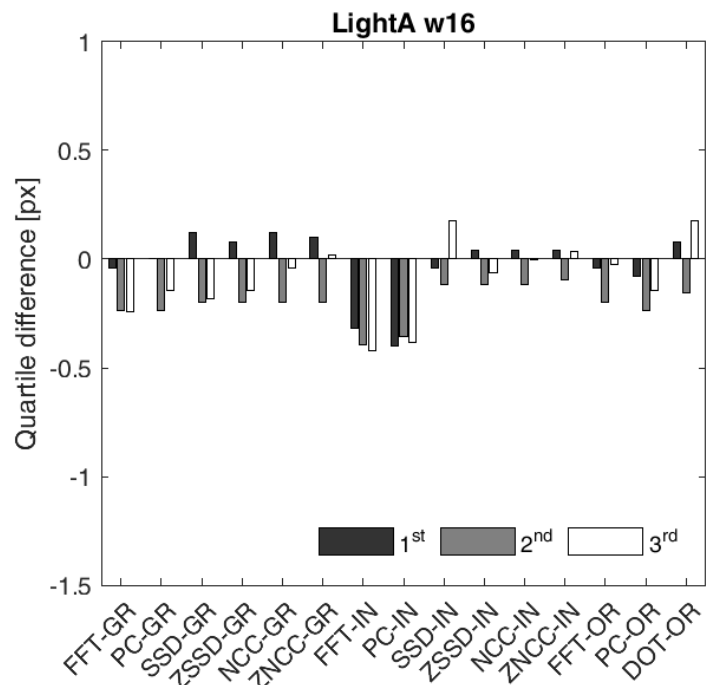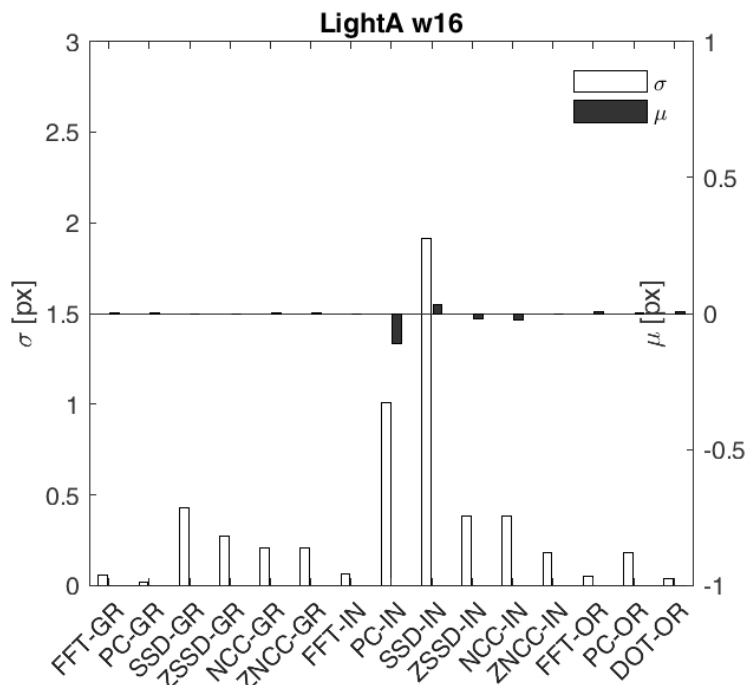

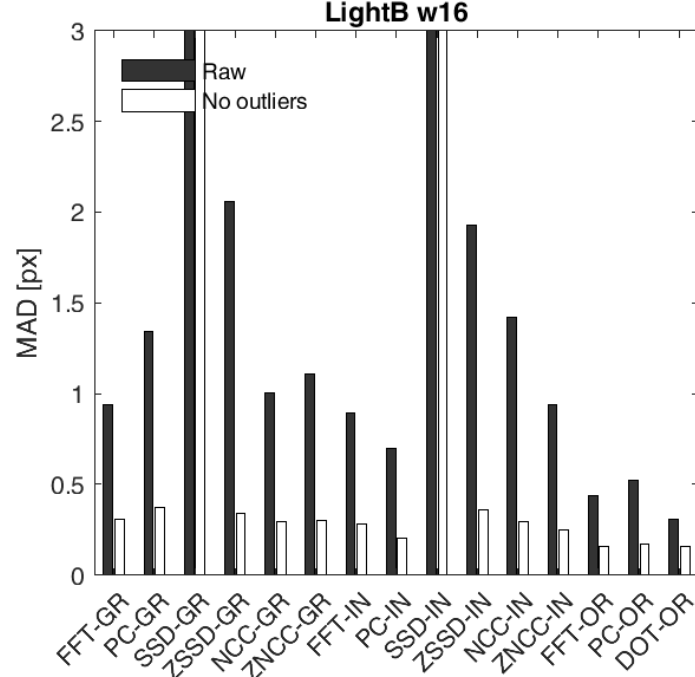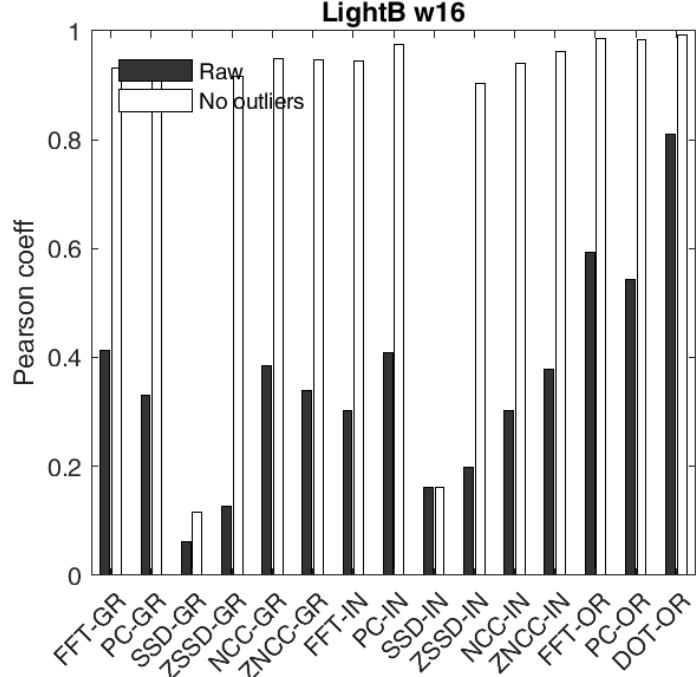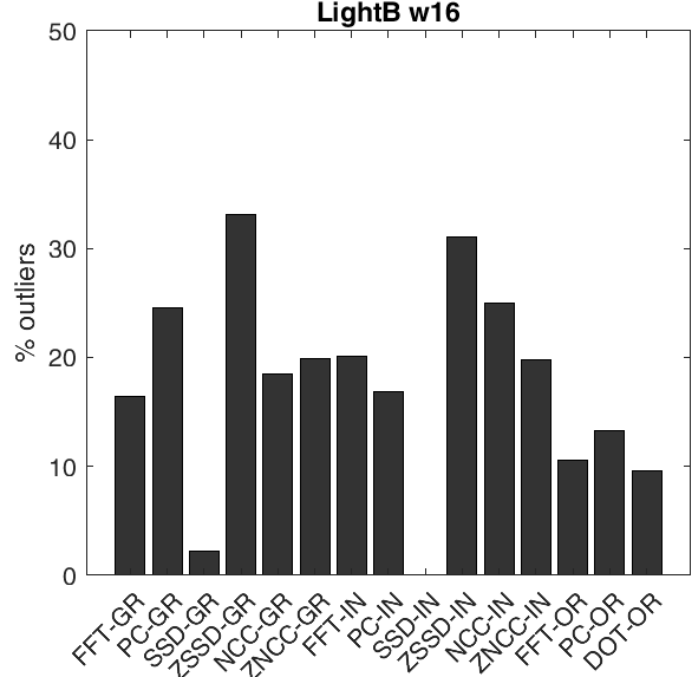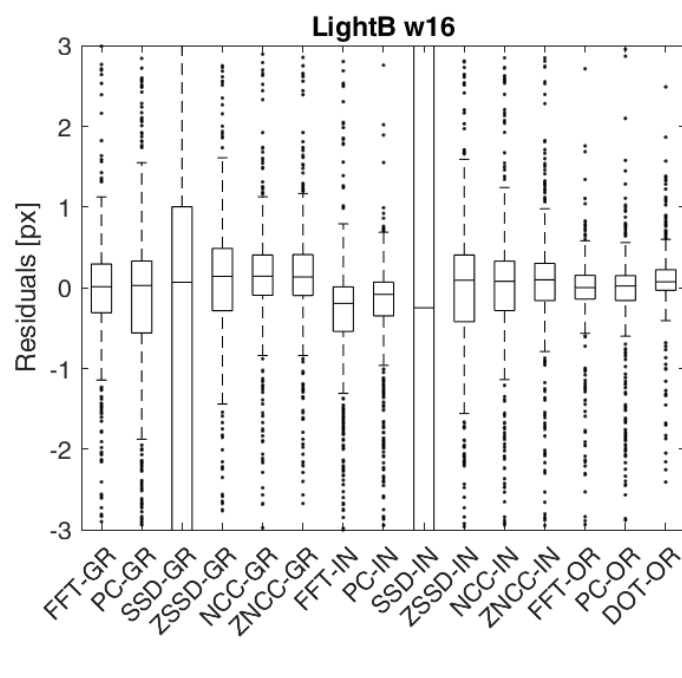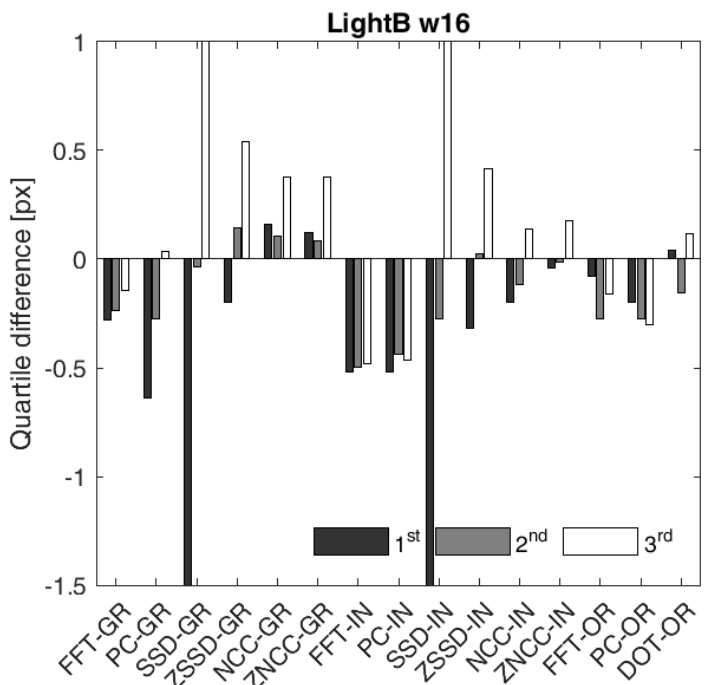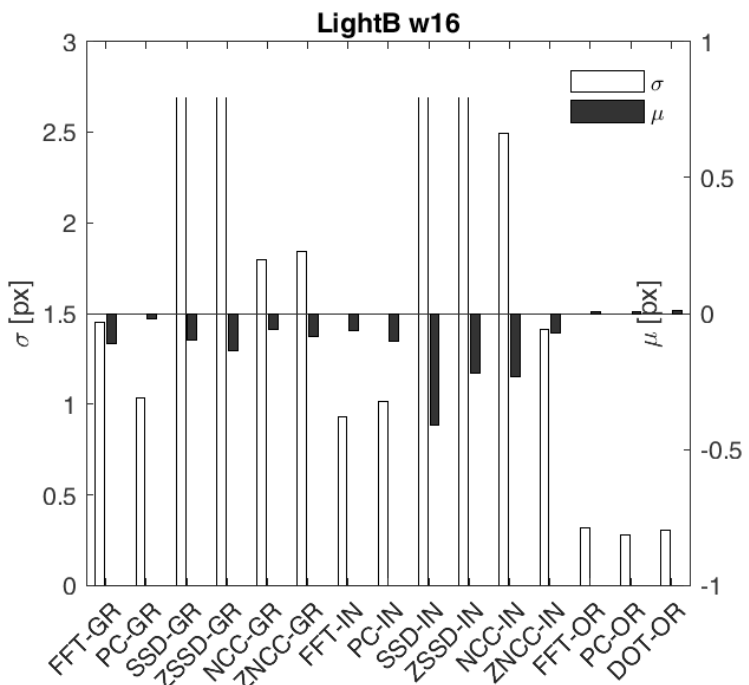



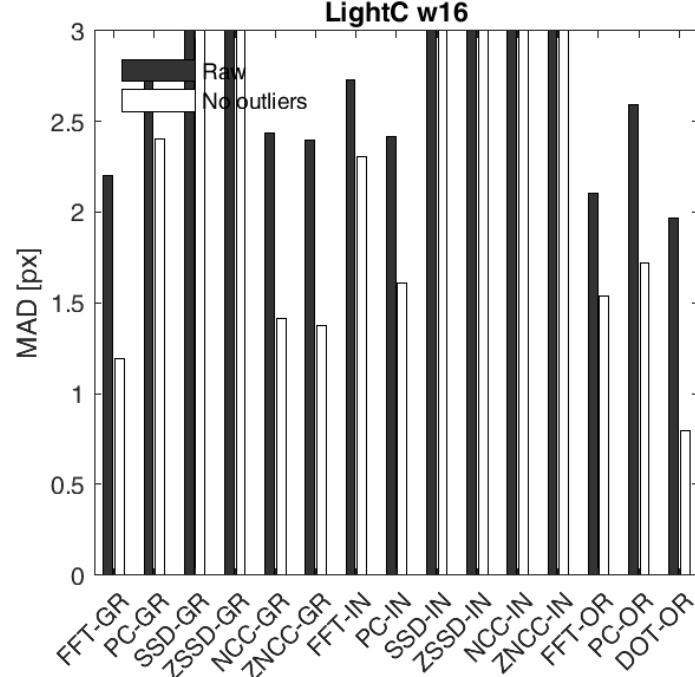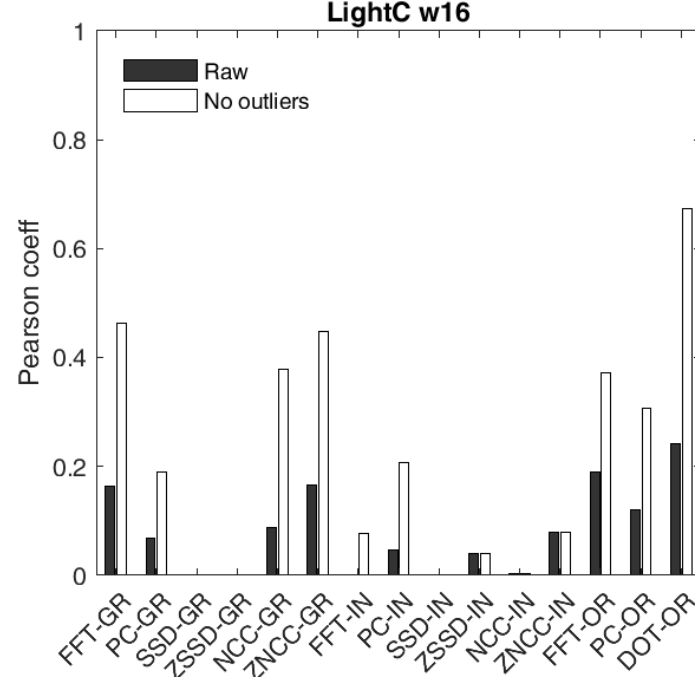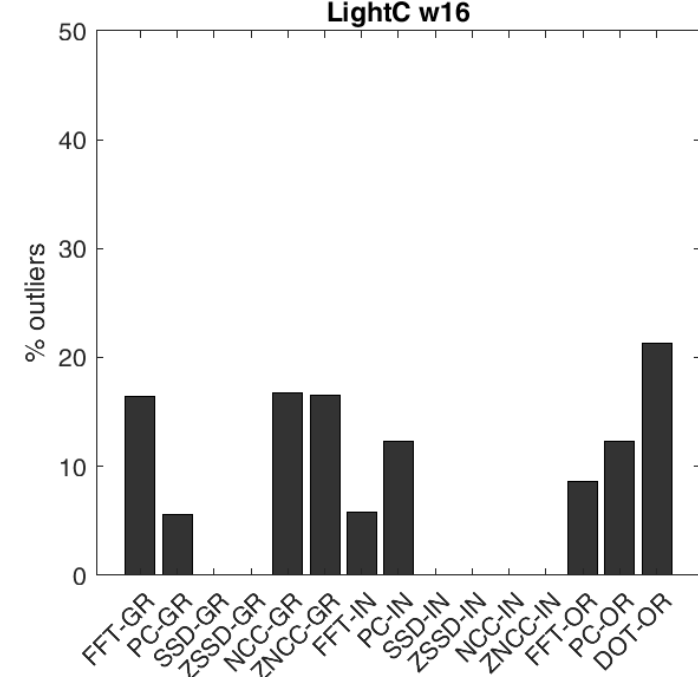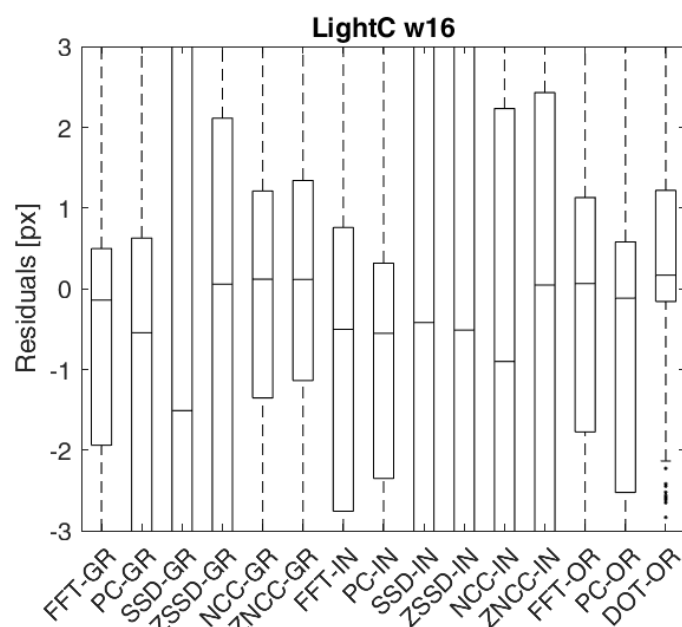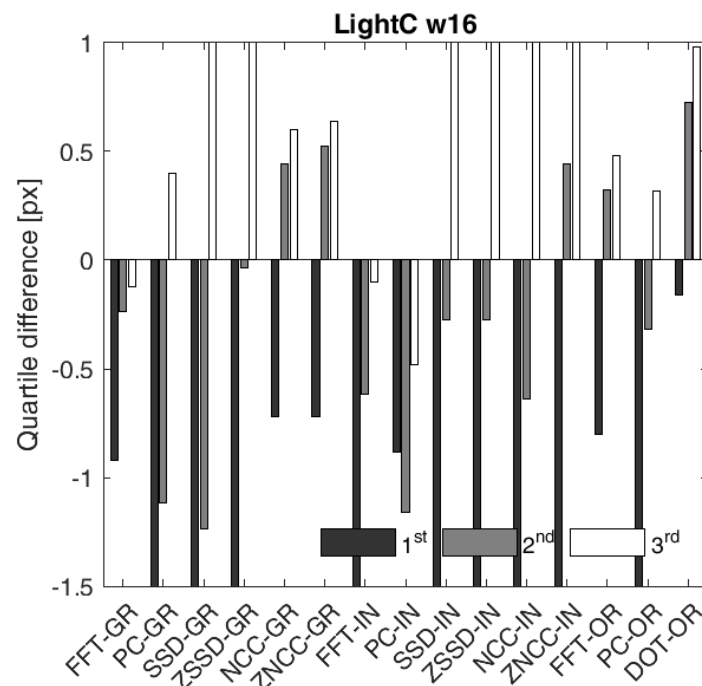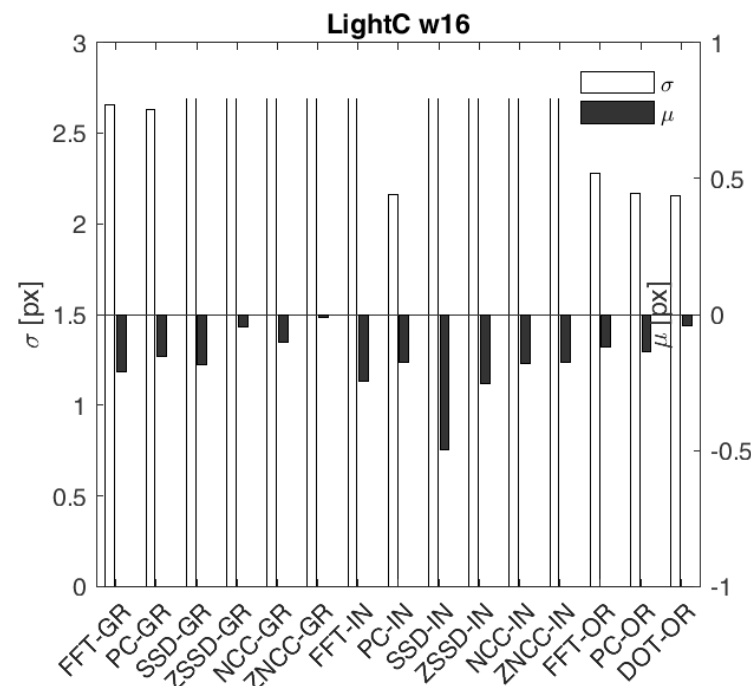

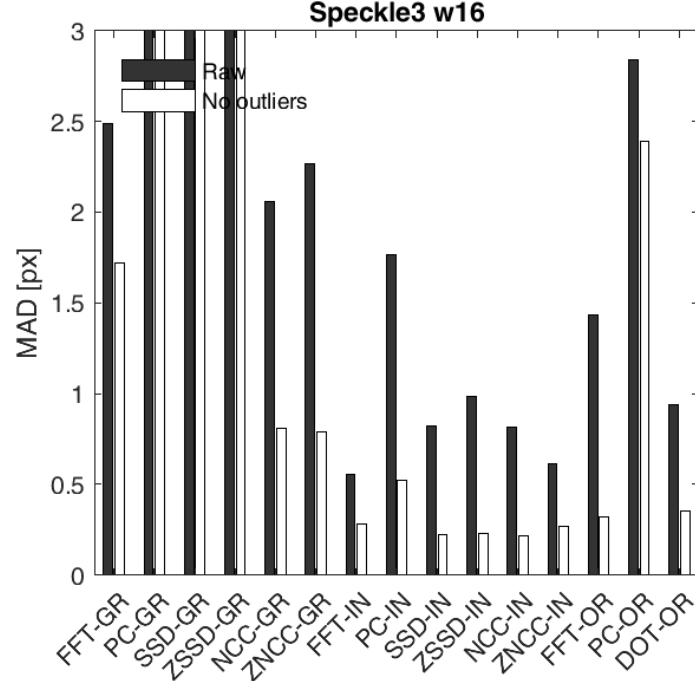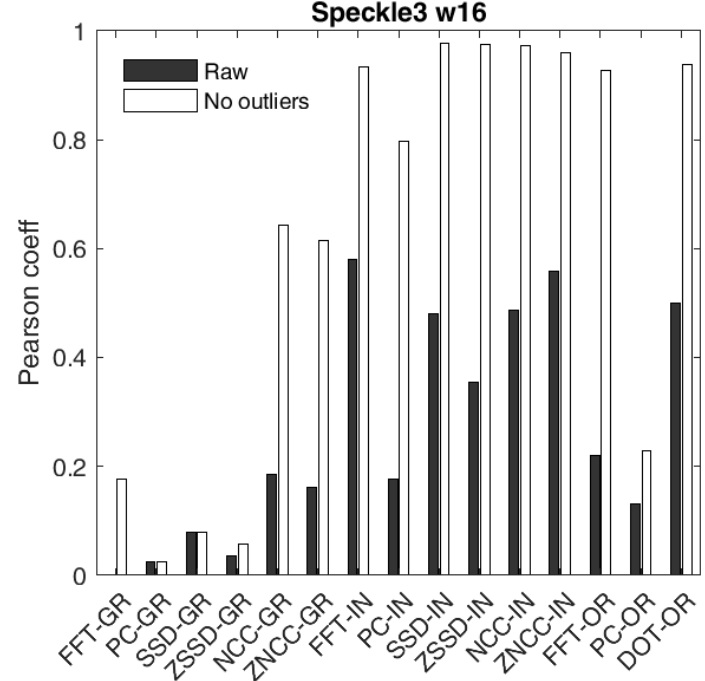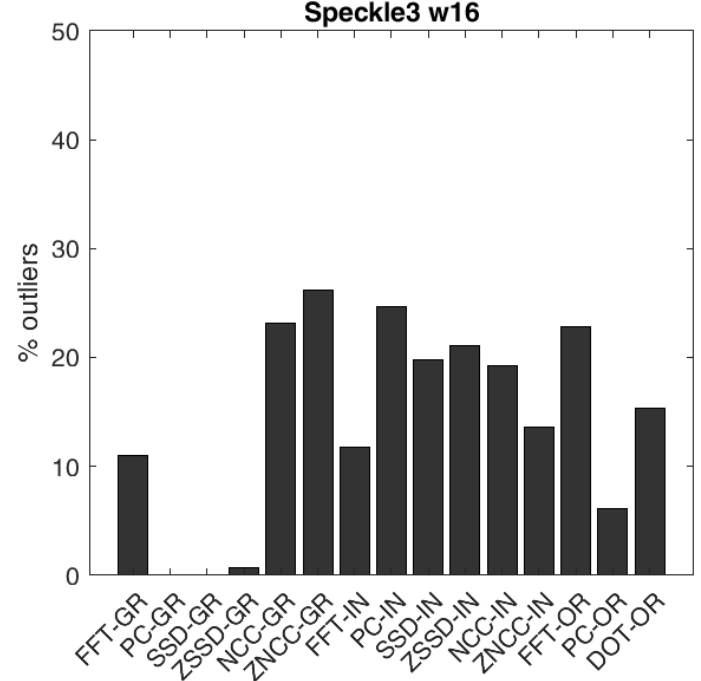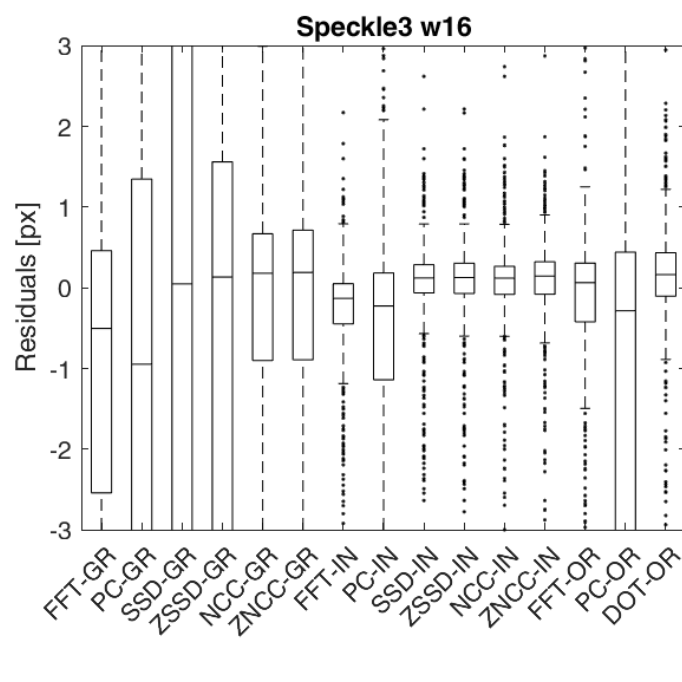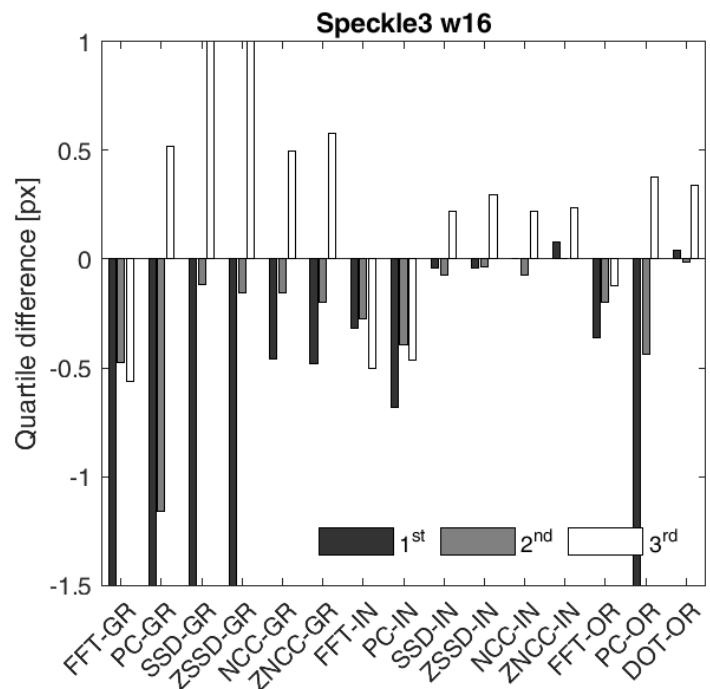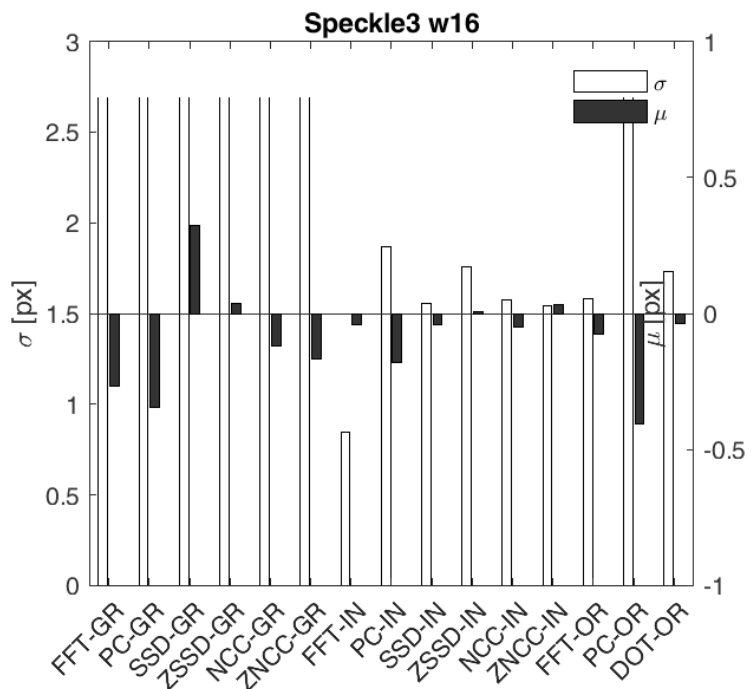

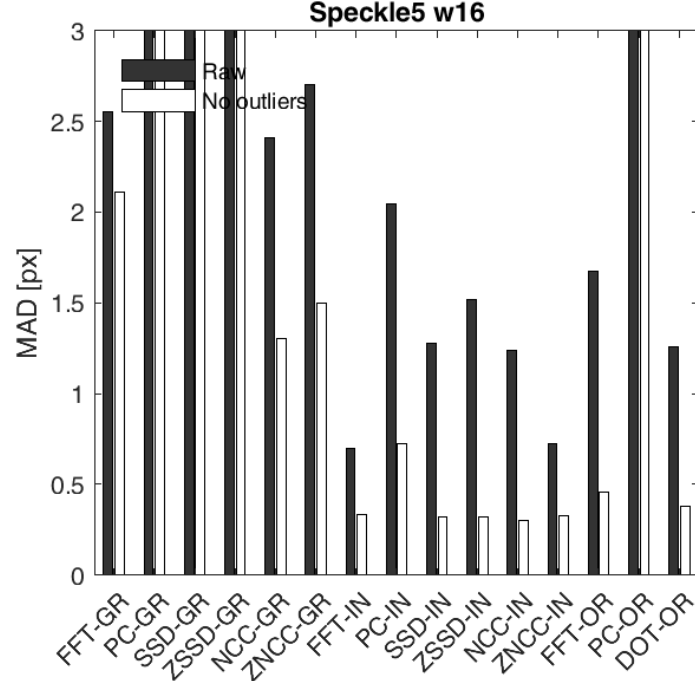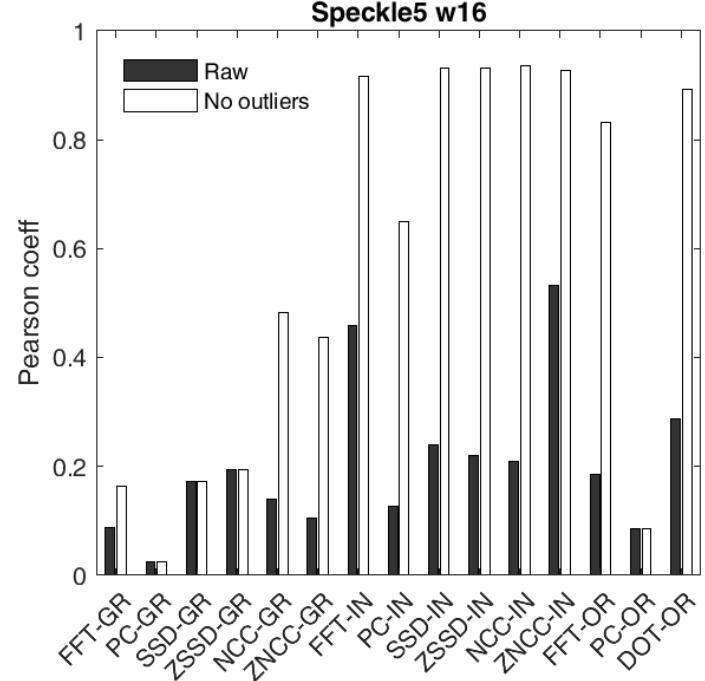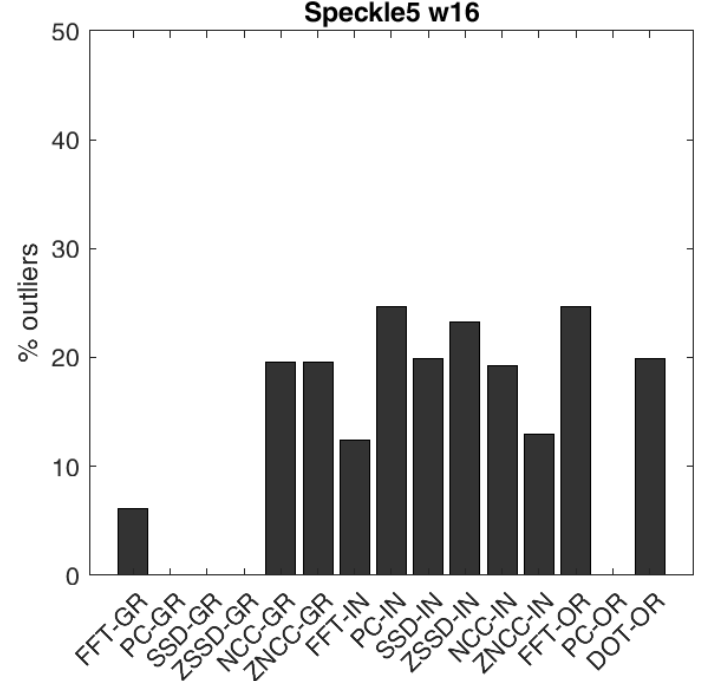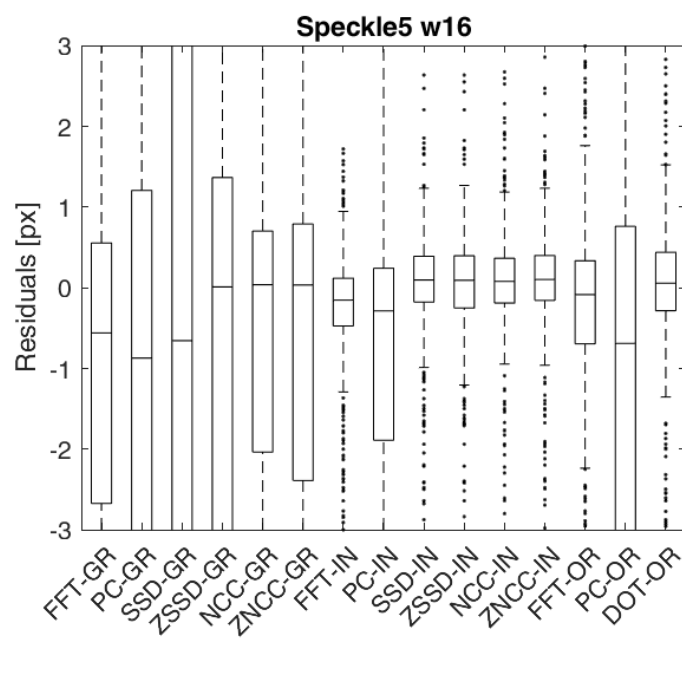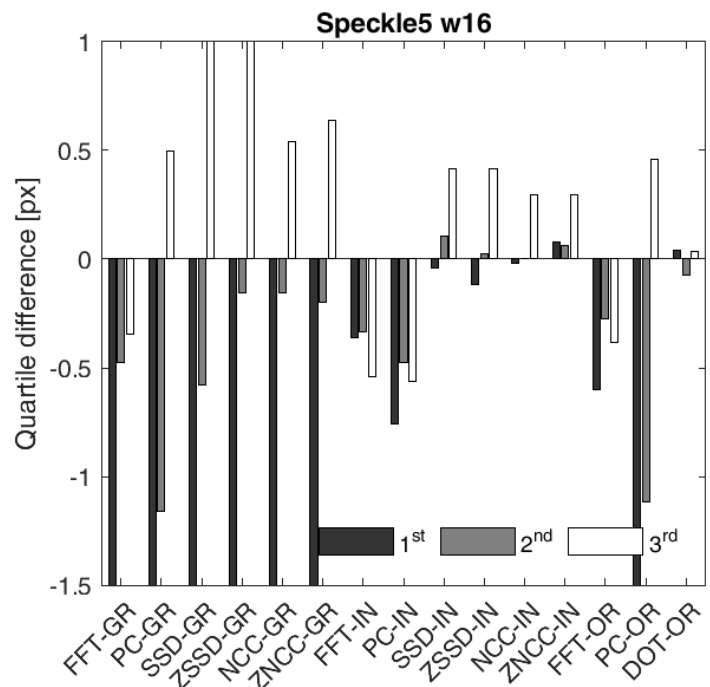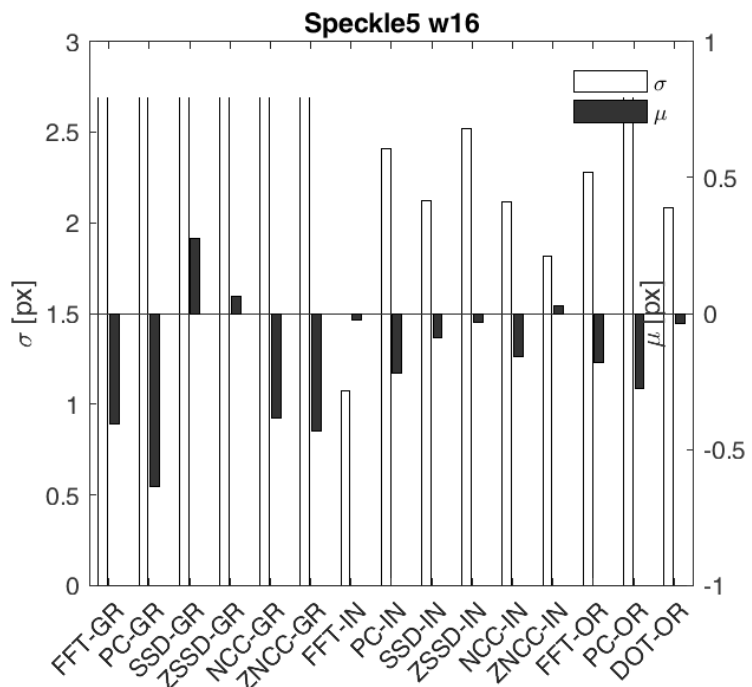

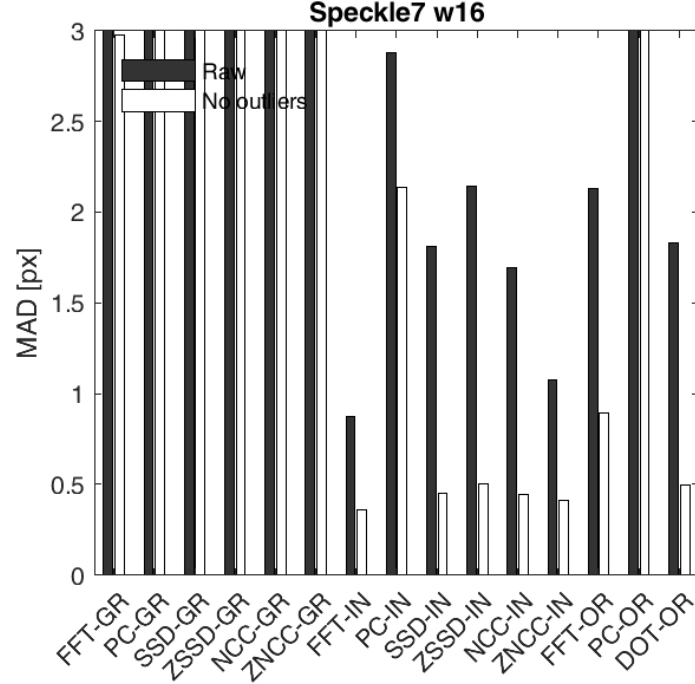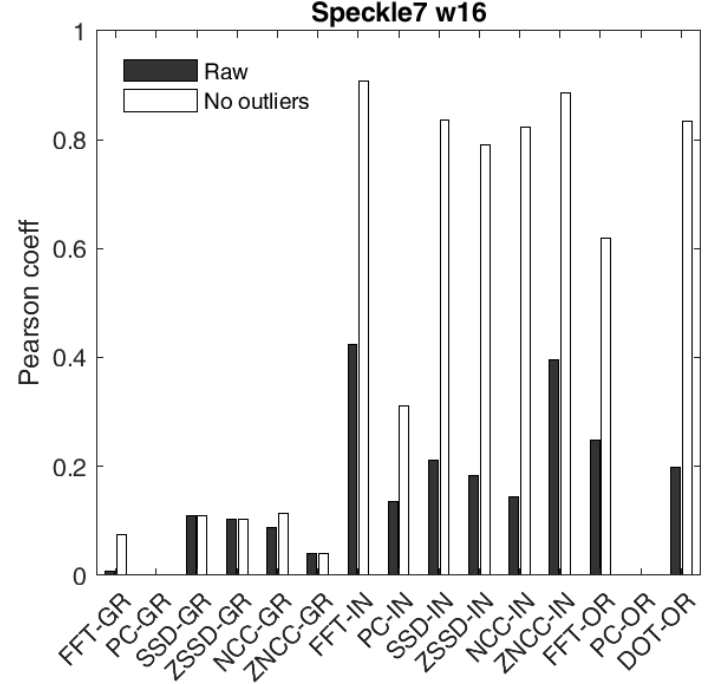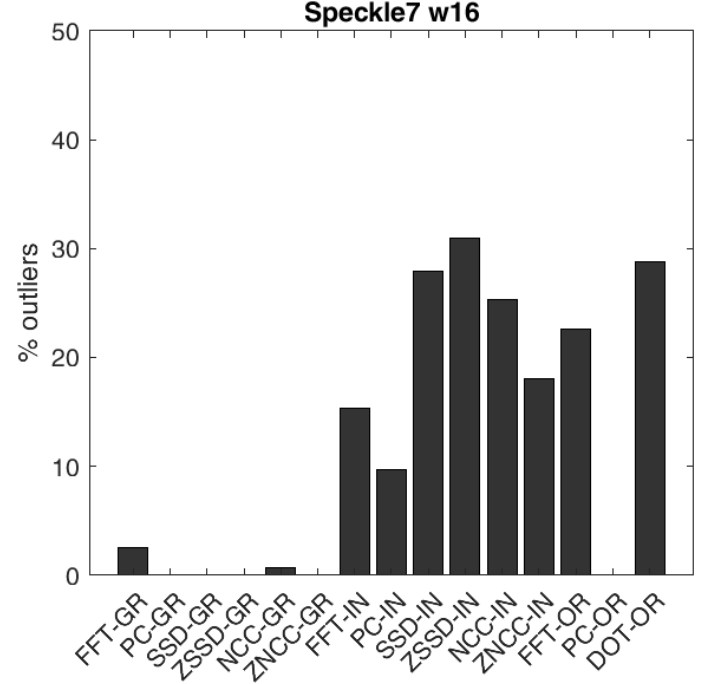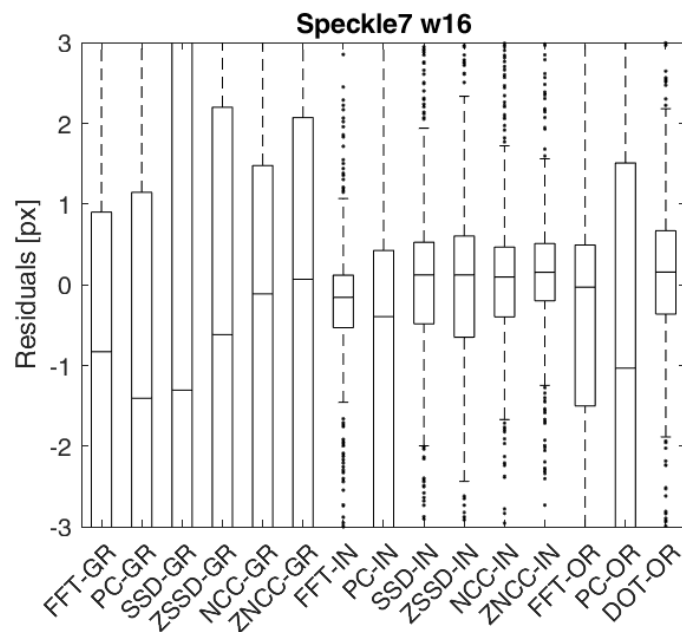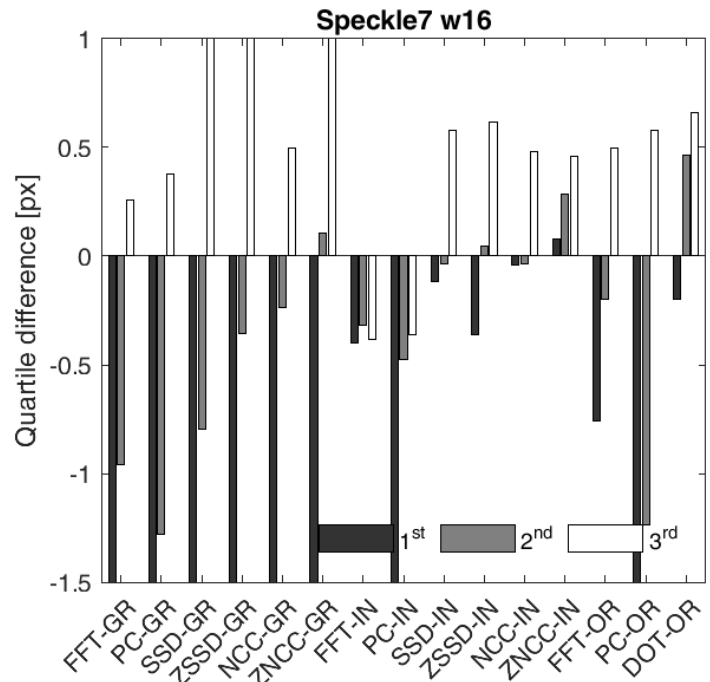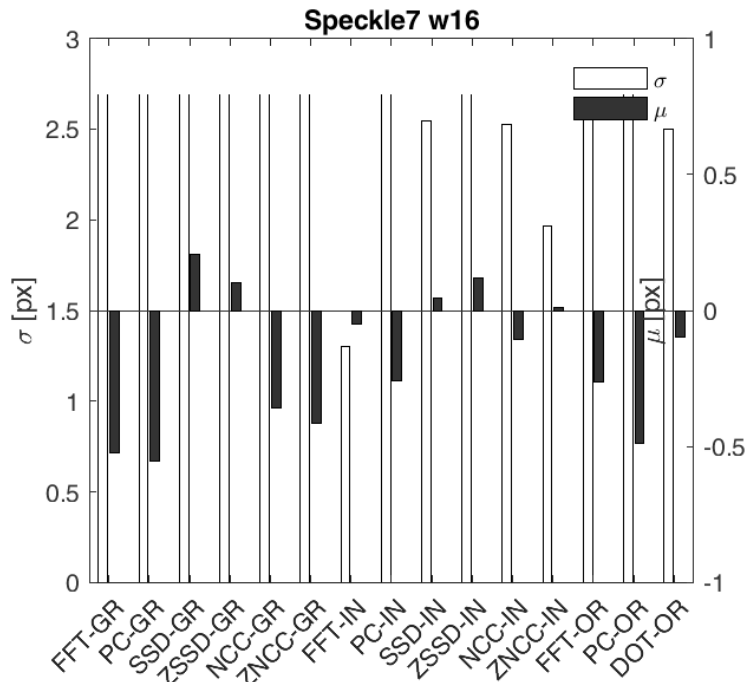

Template size 32x32

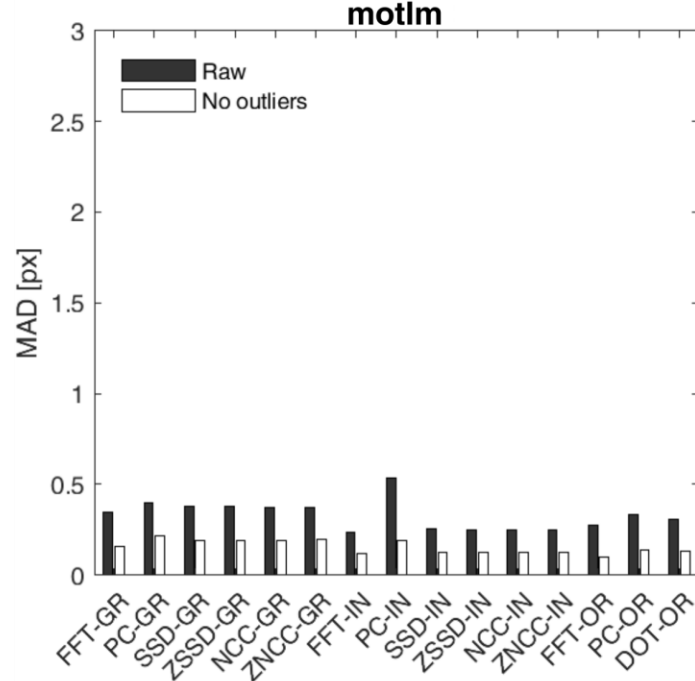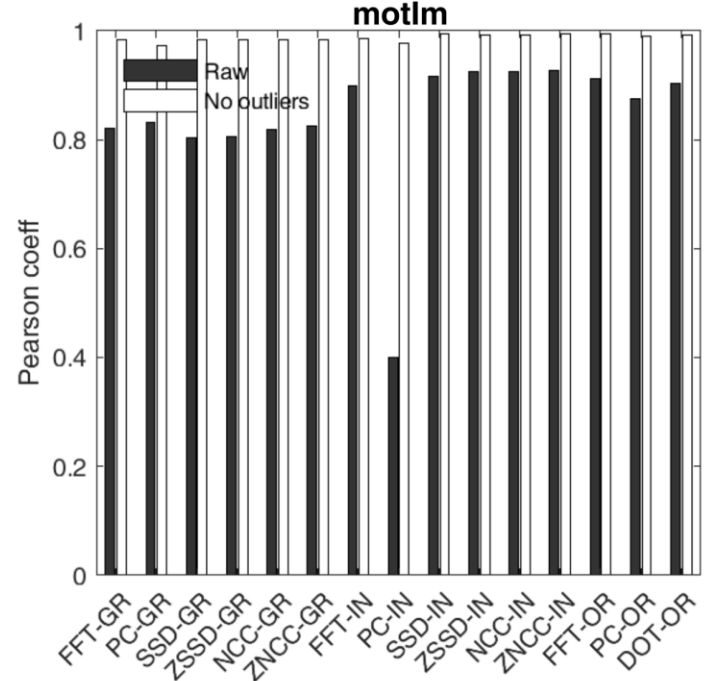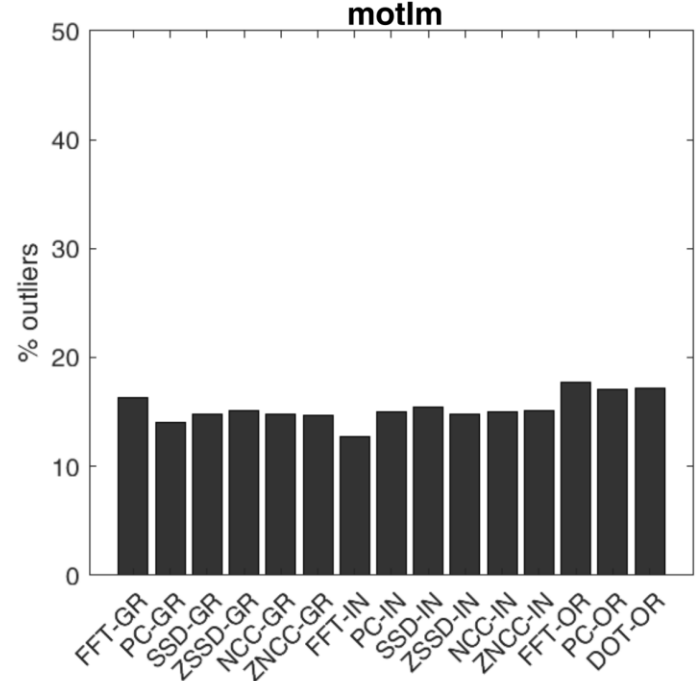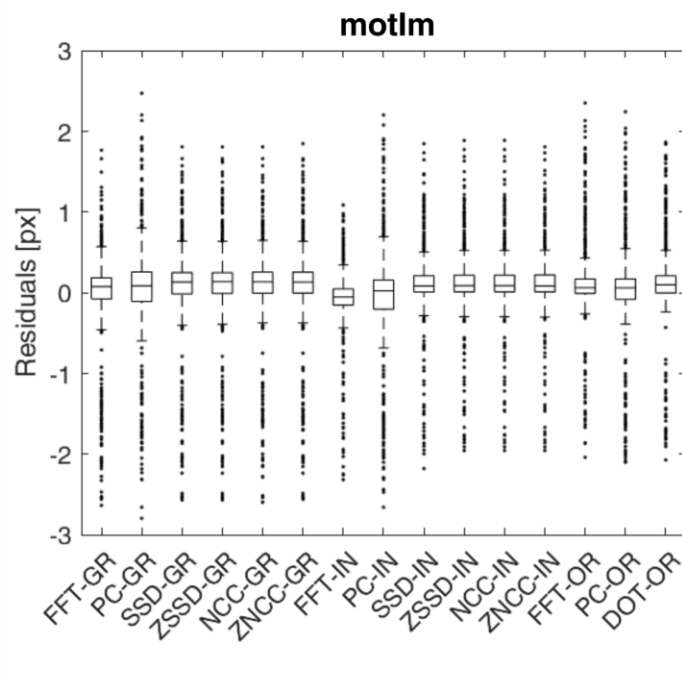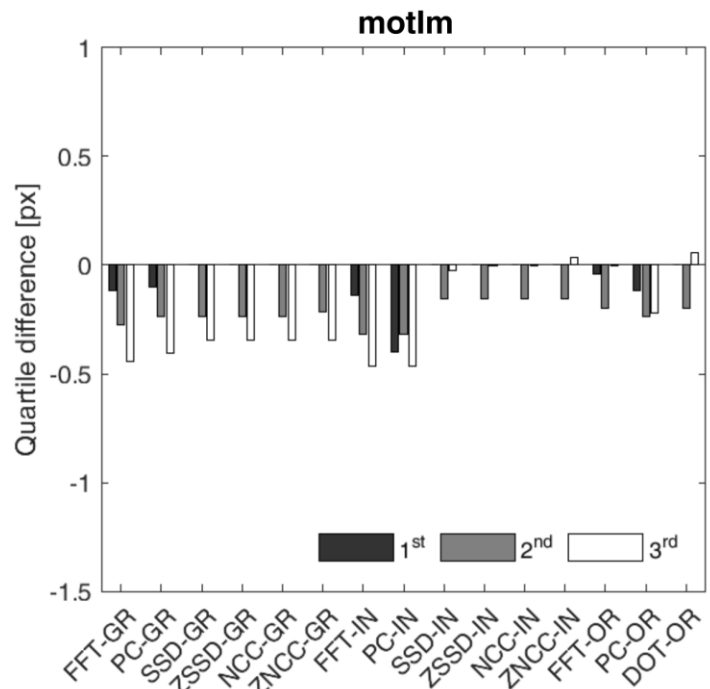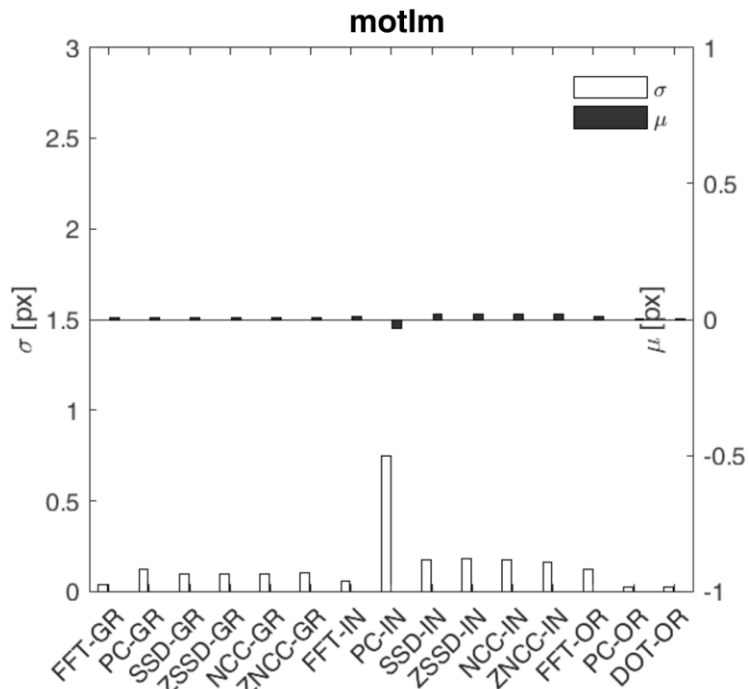

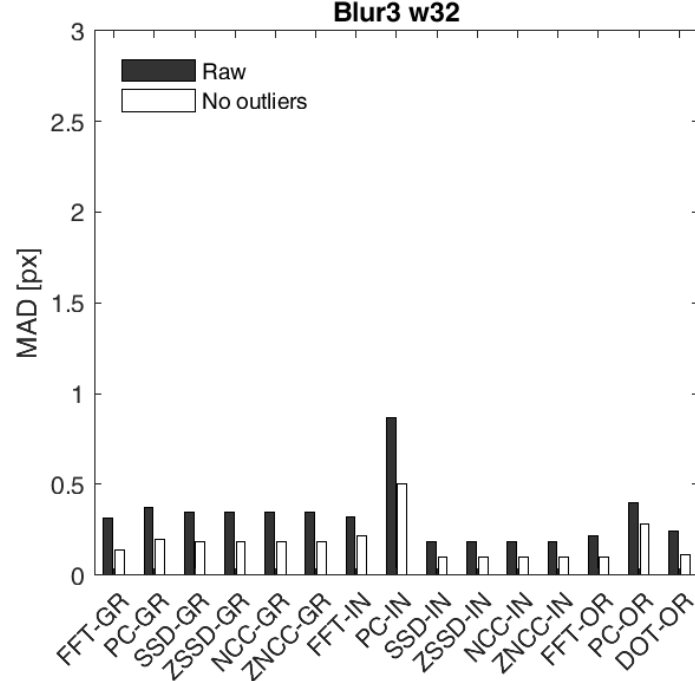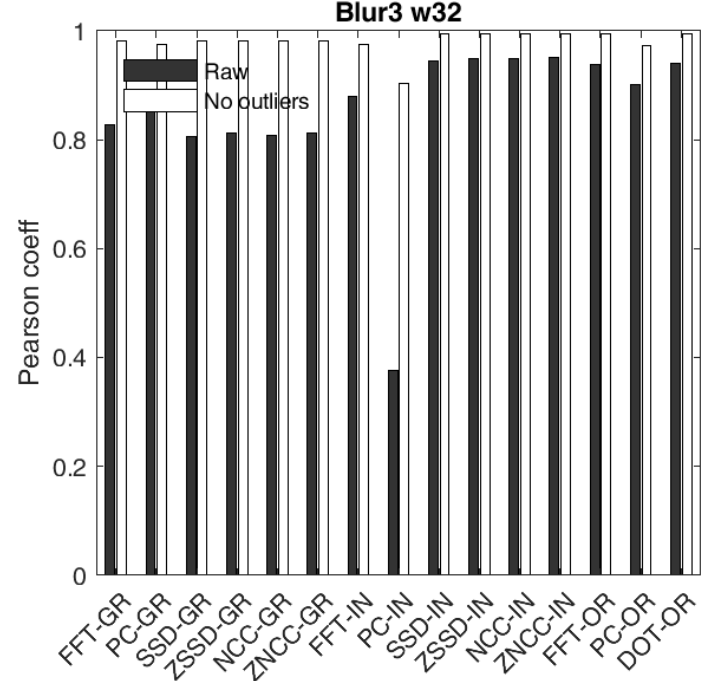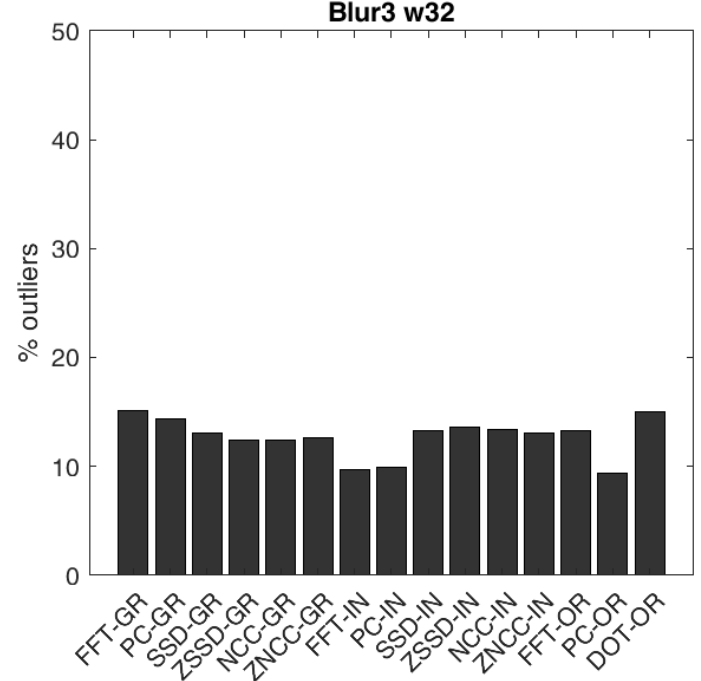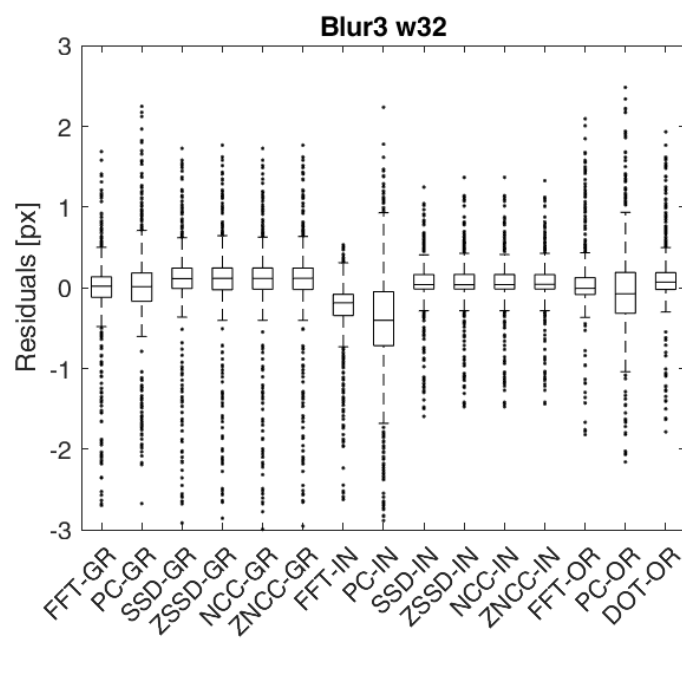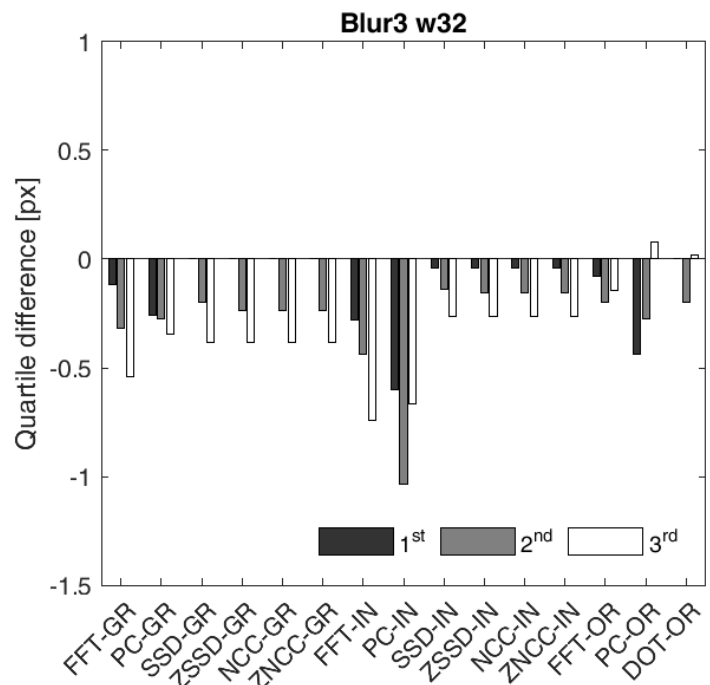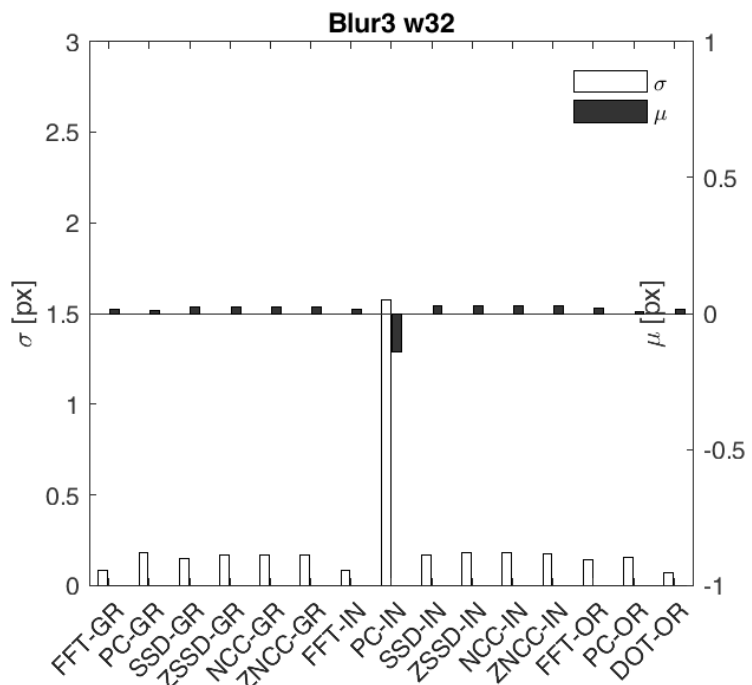

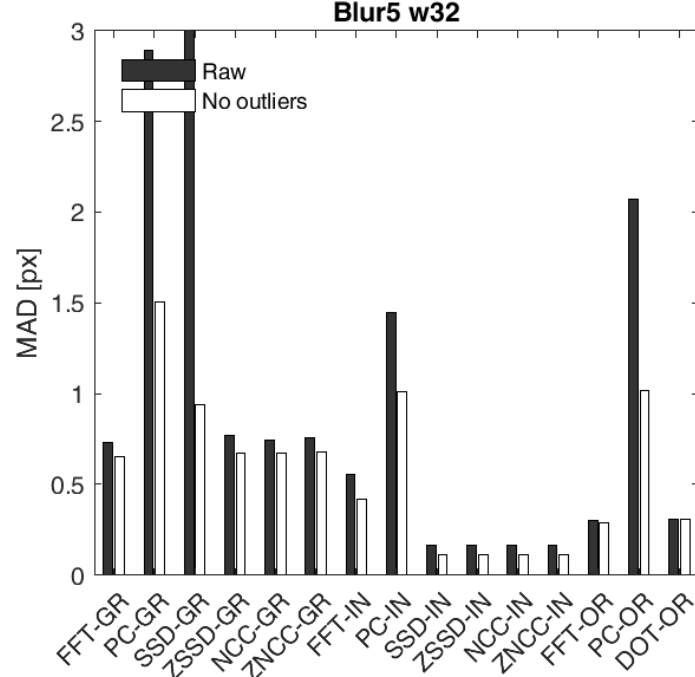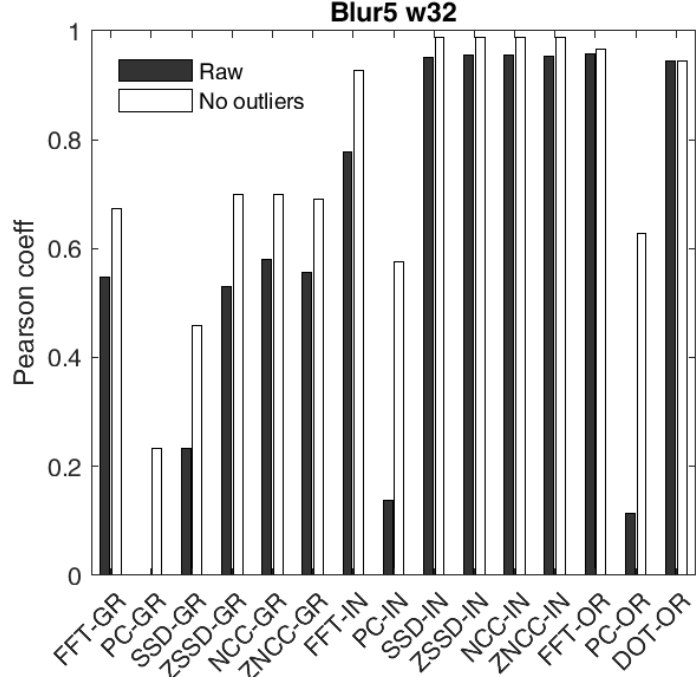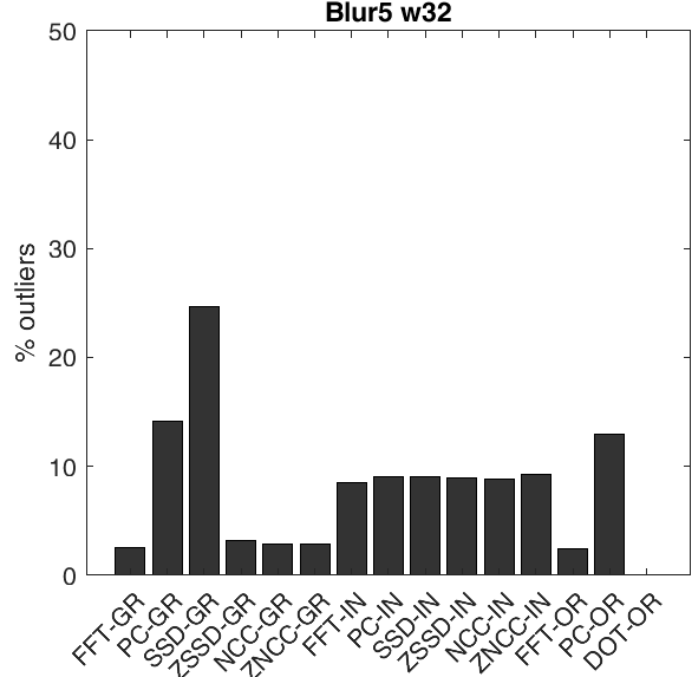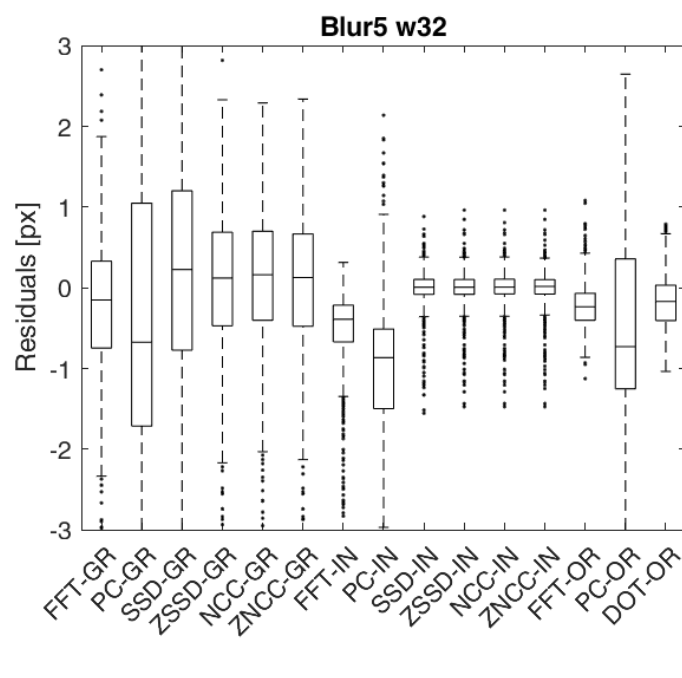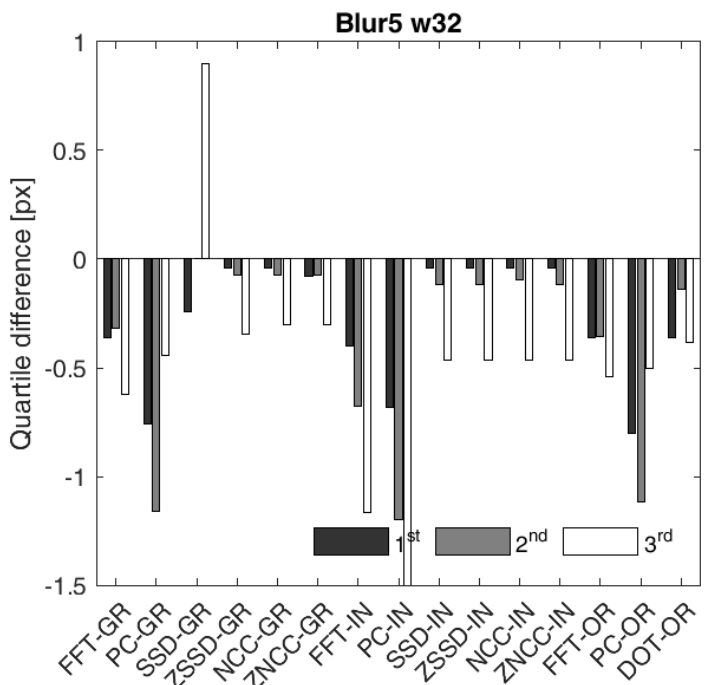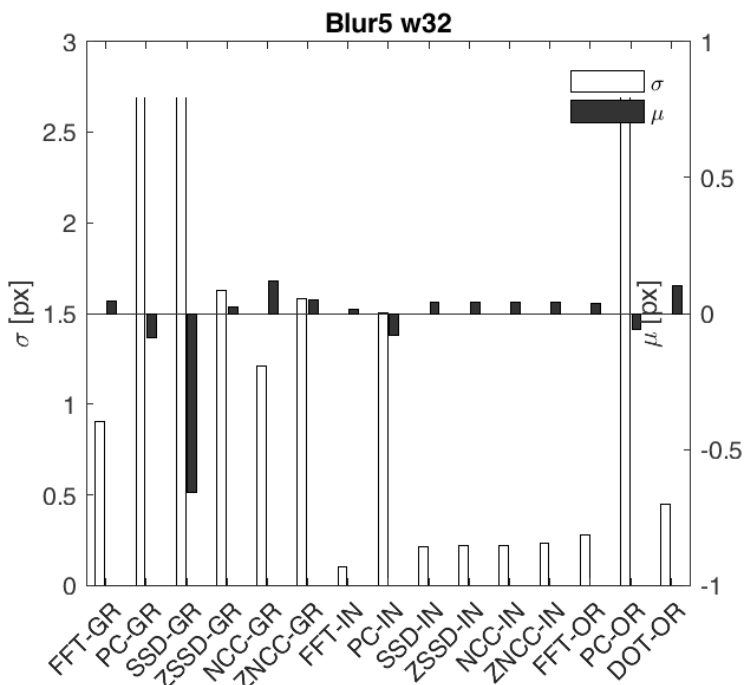



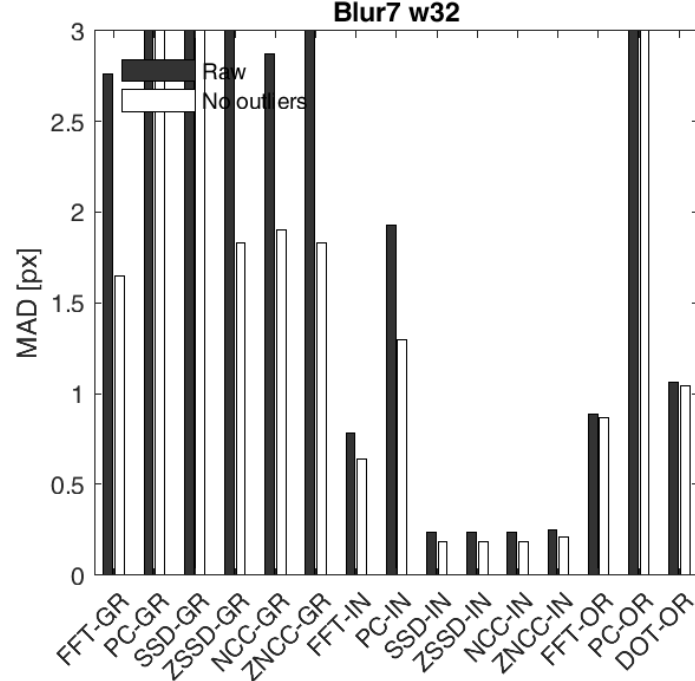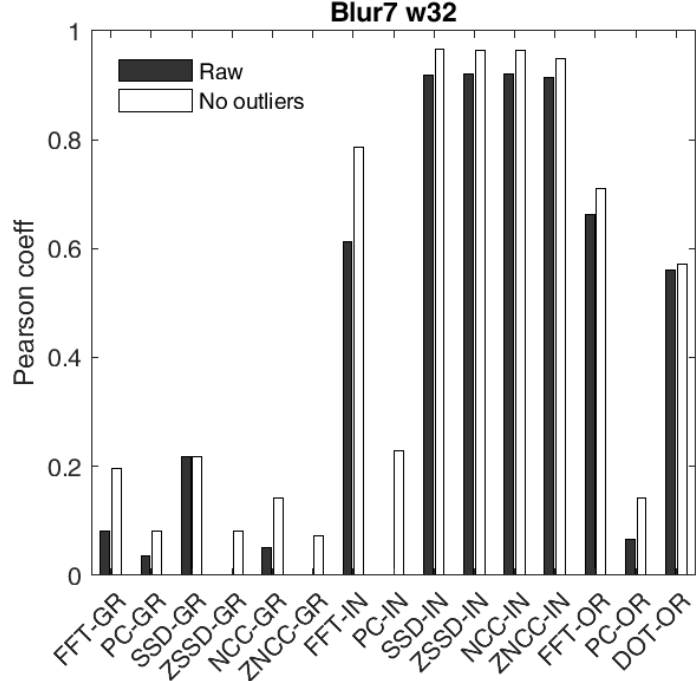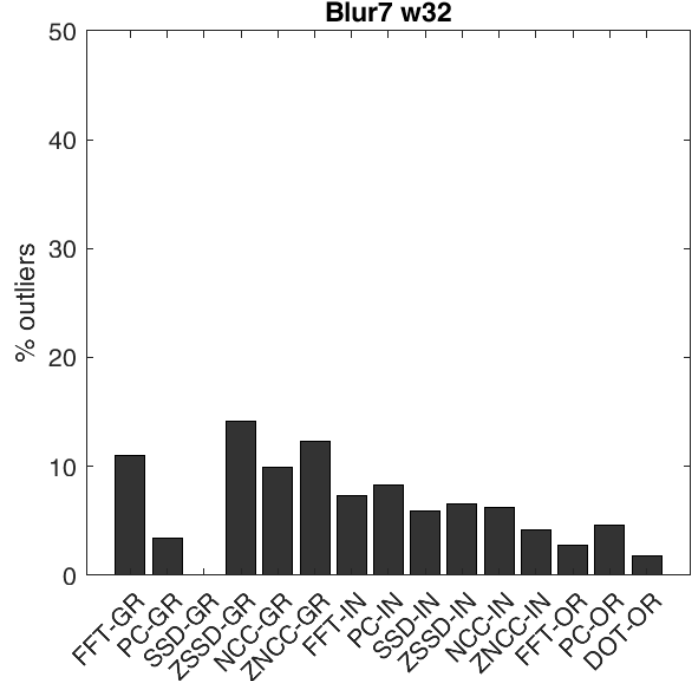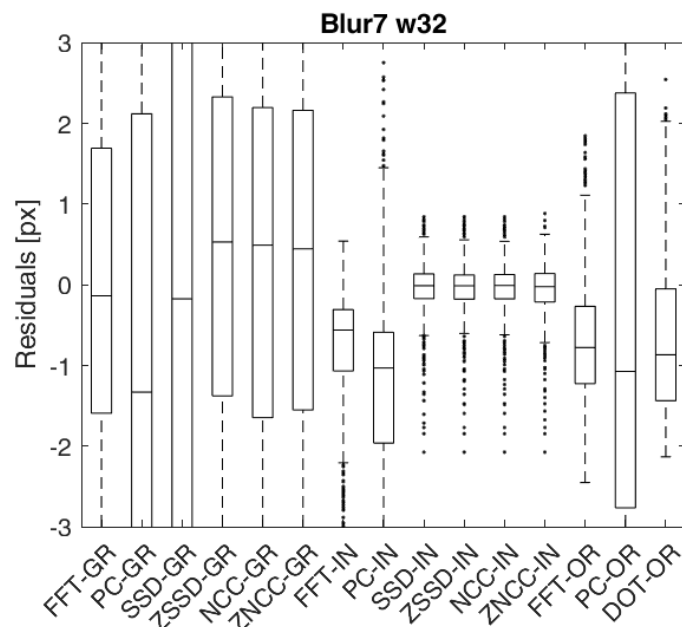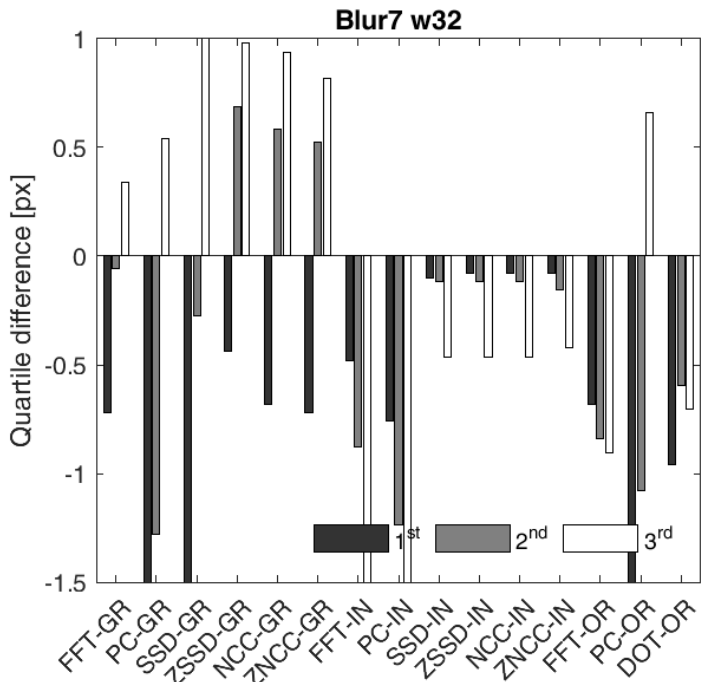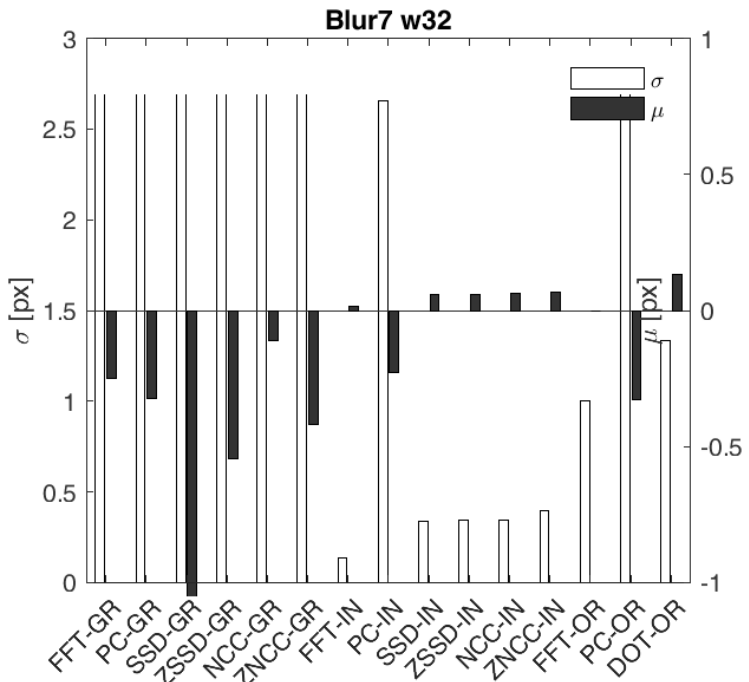

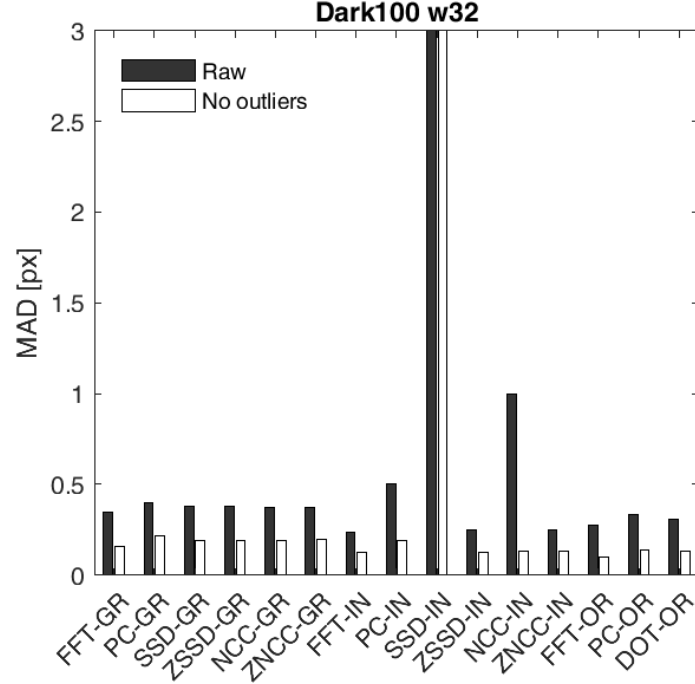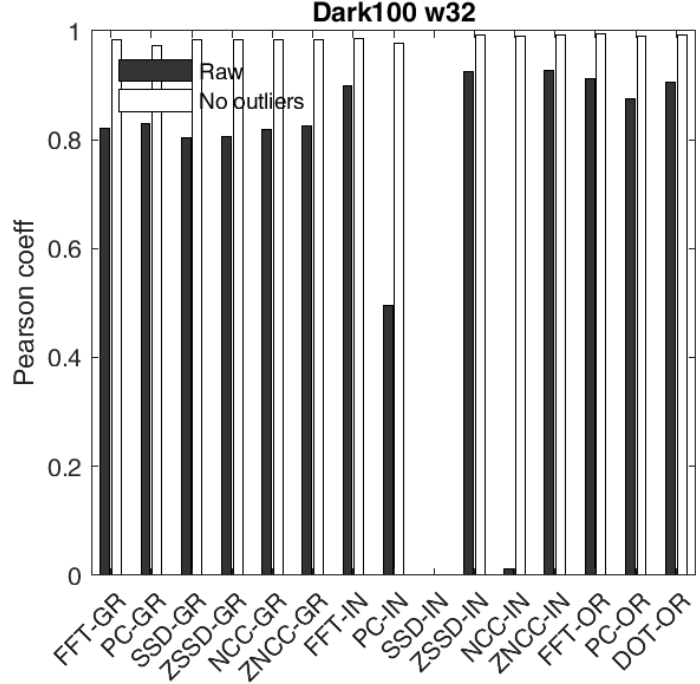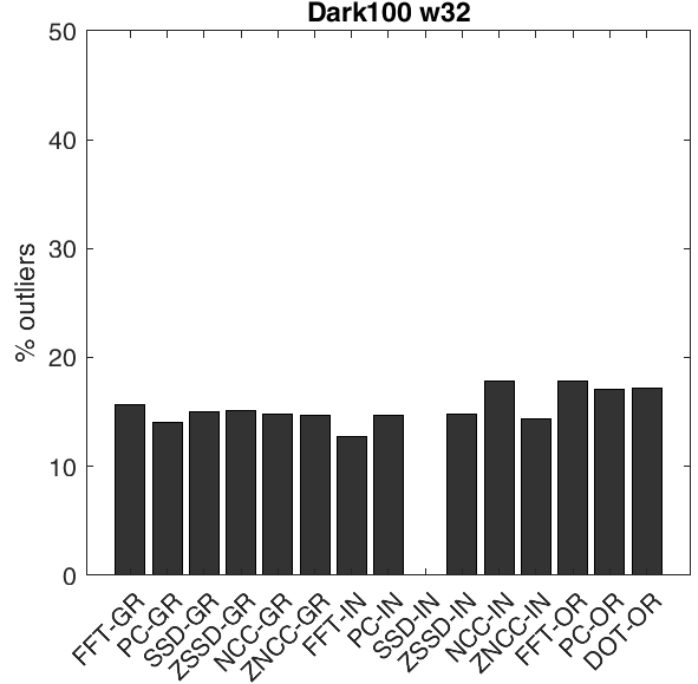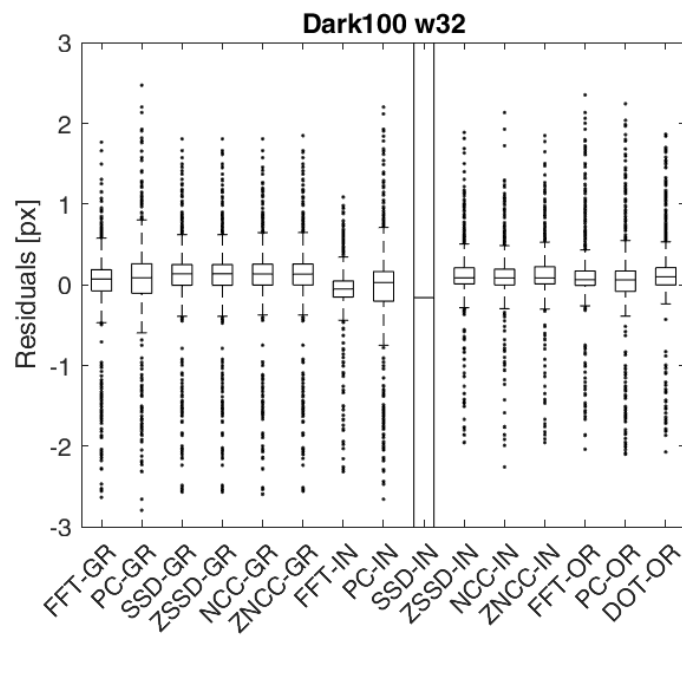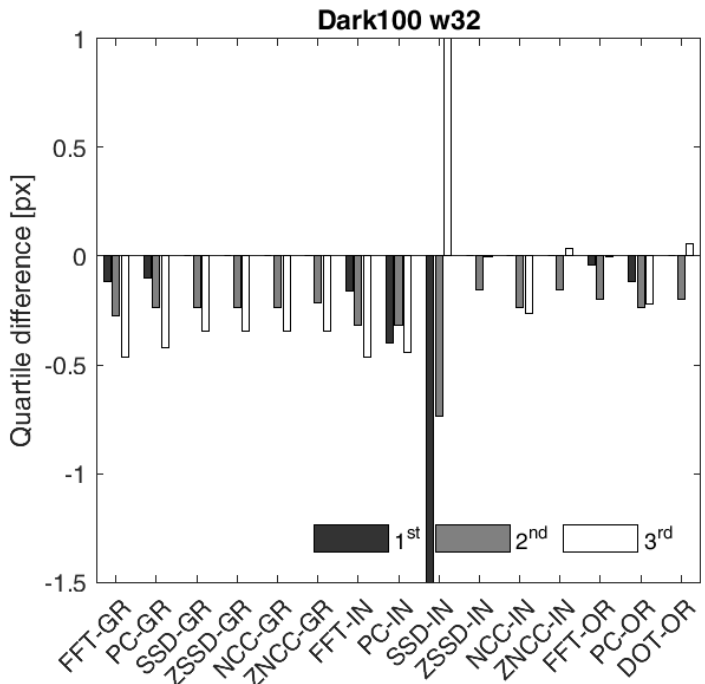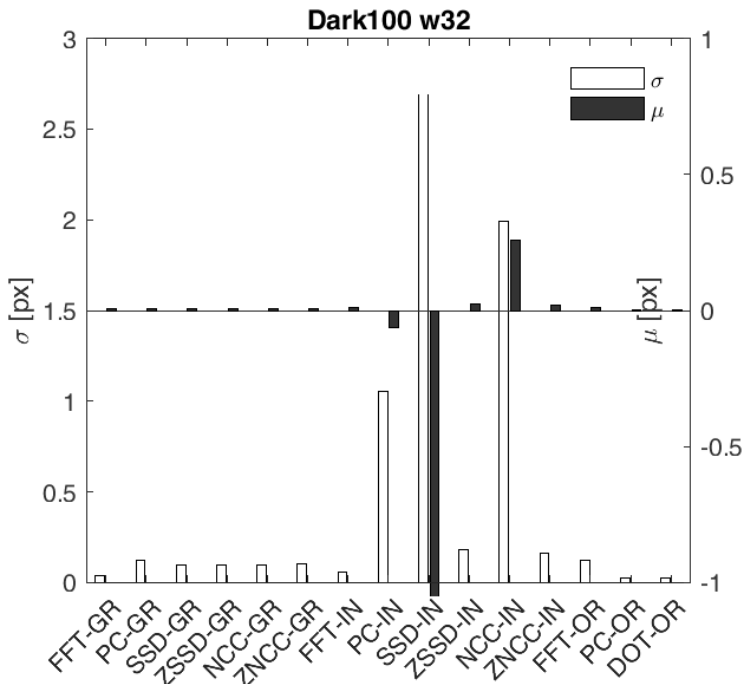

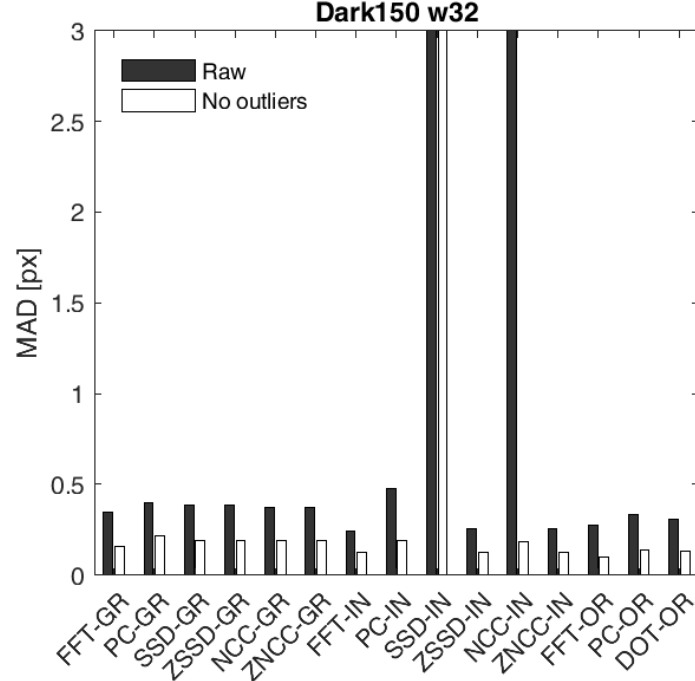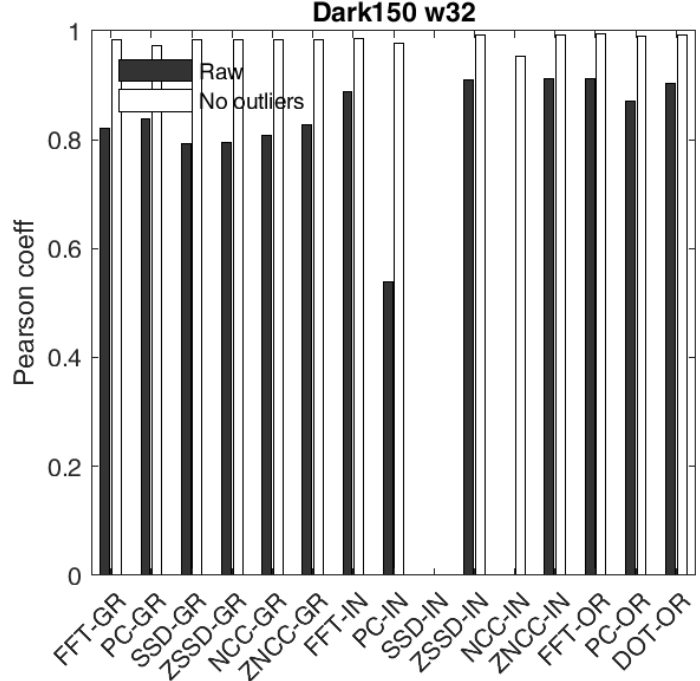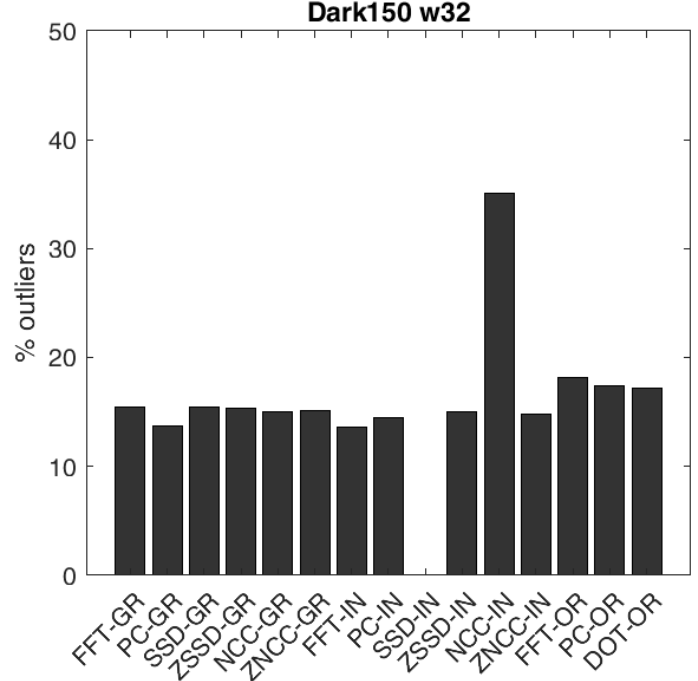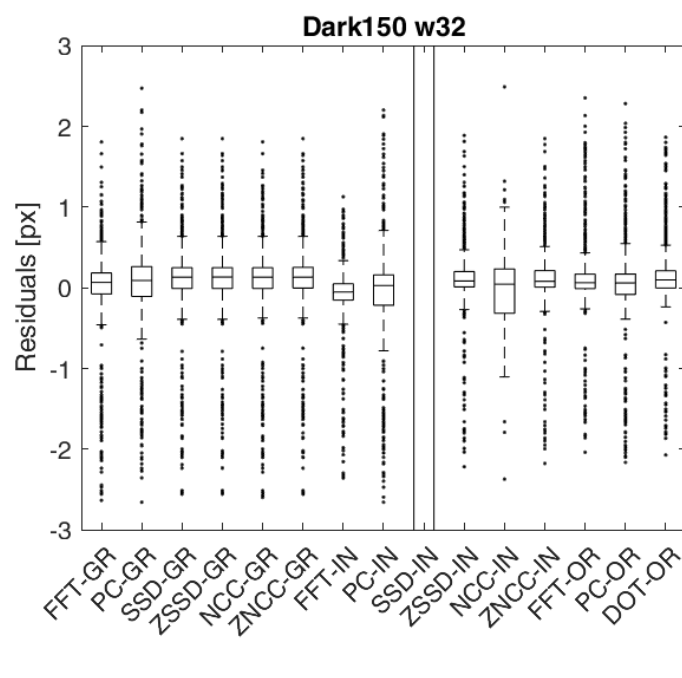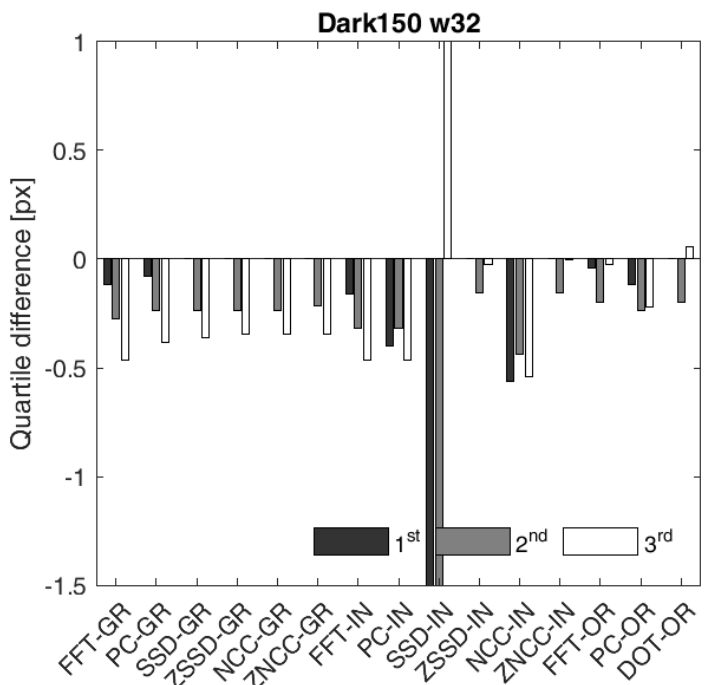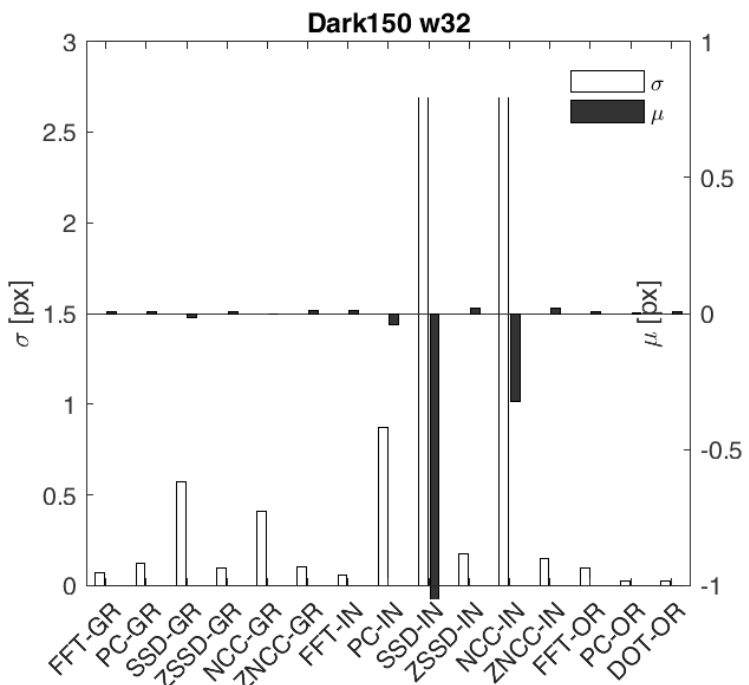

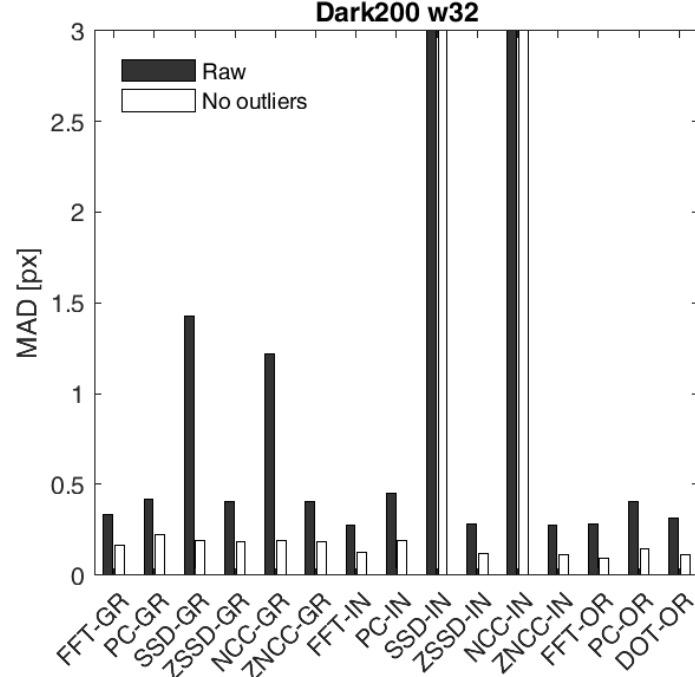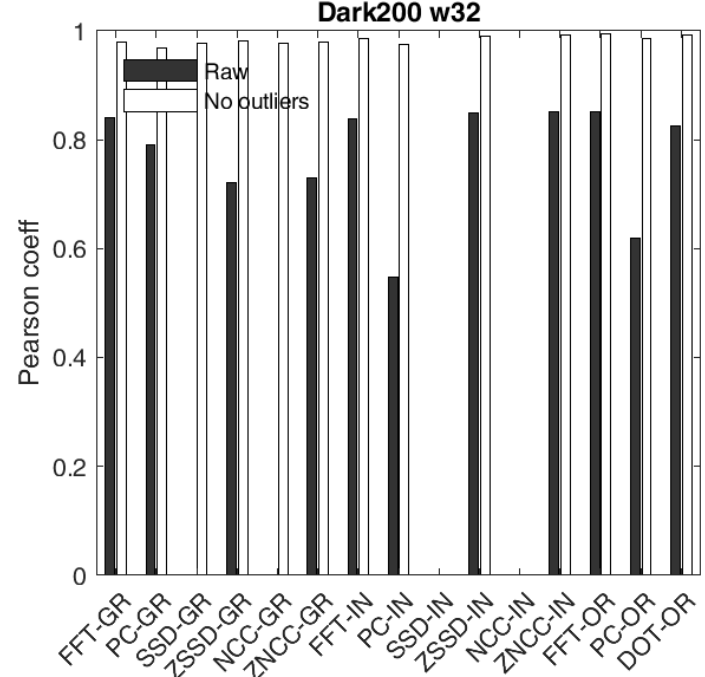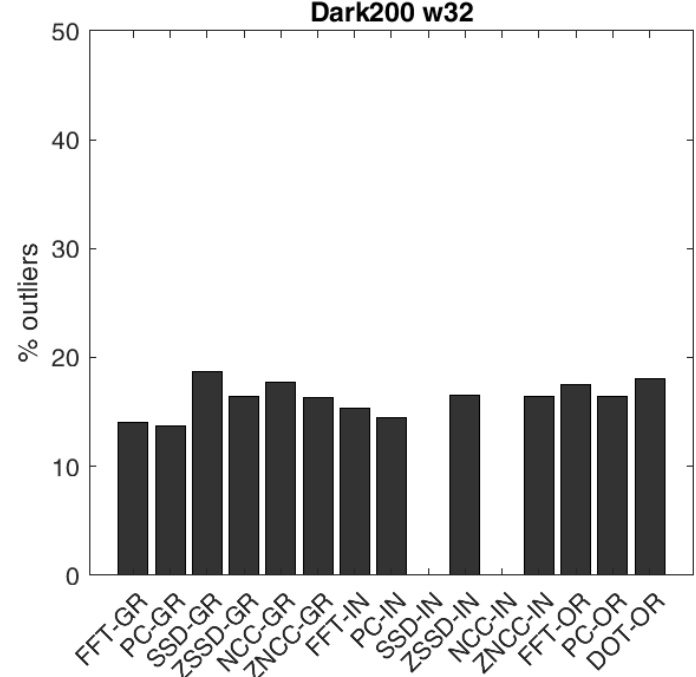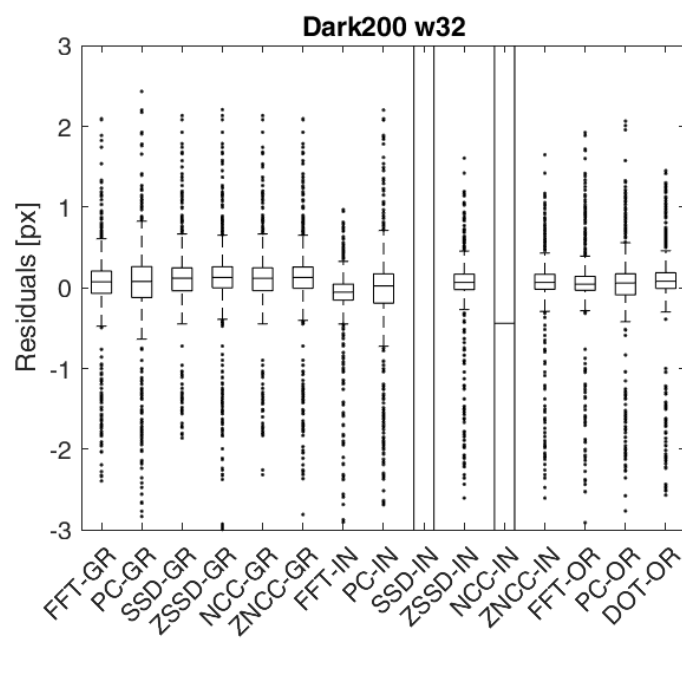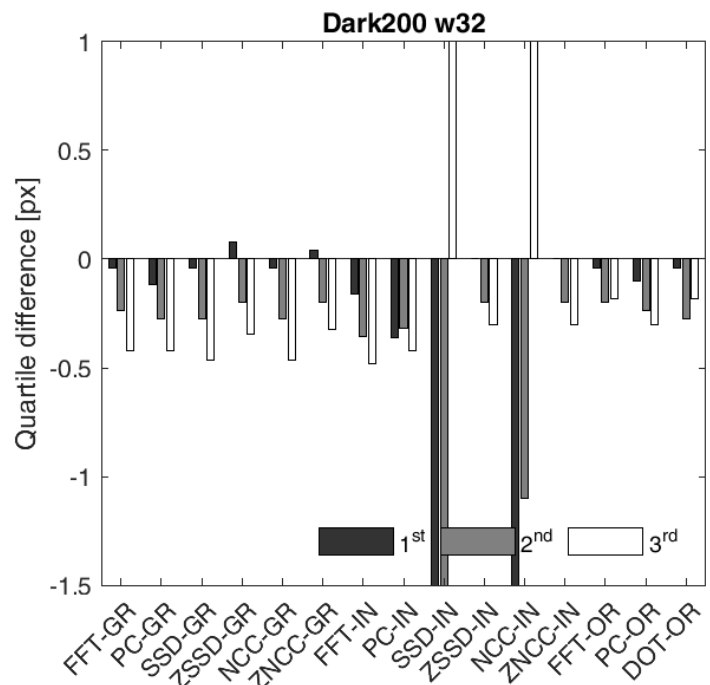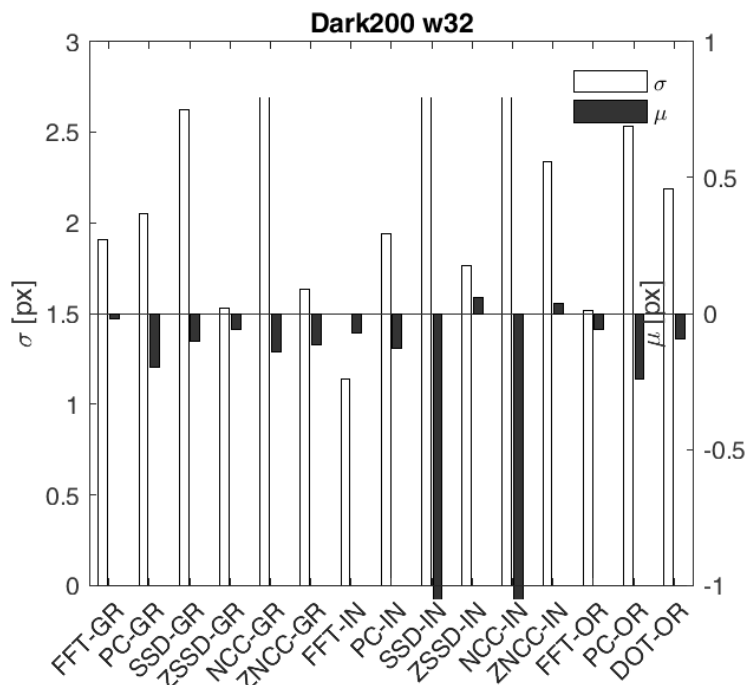

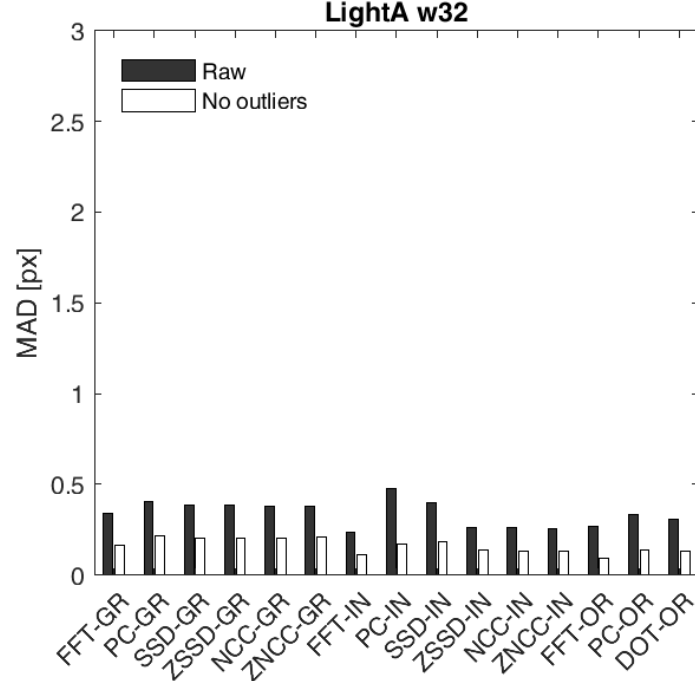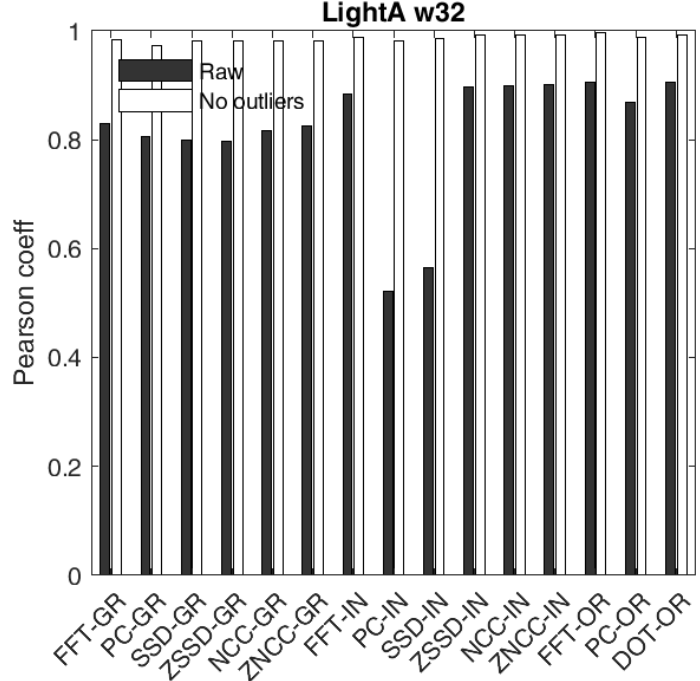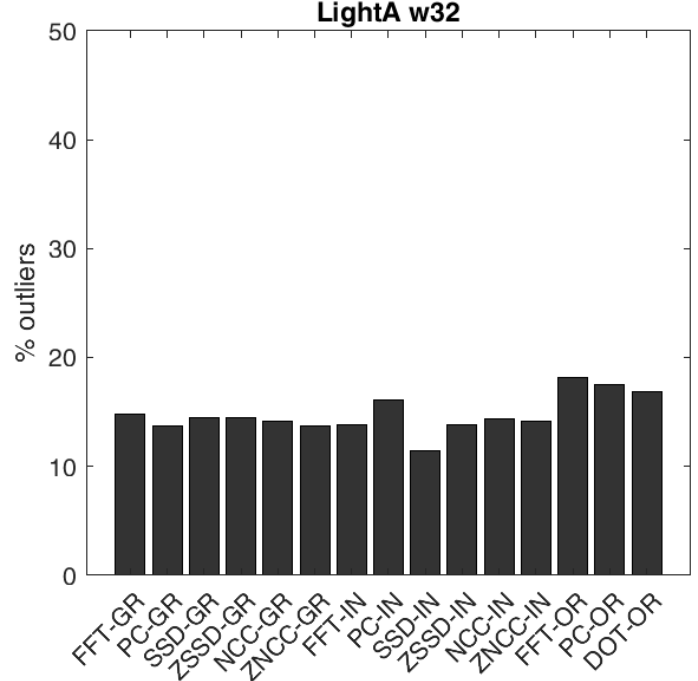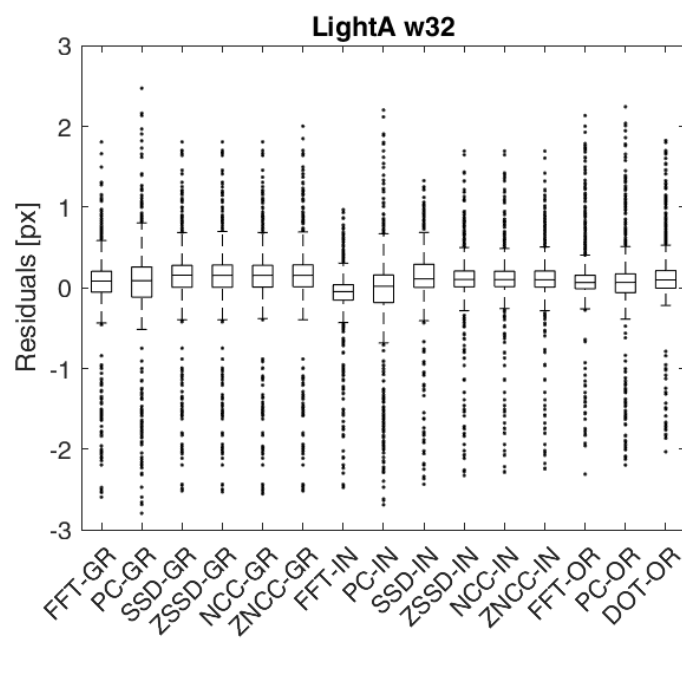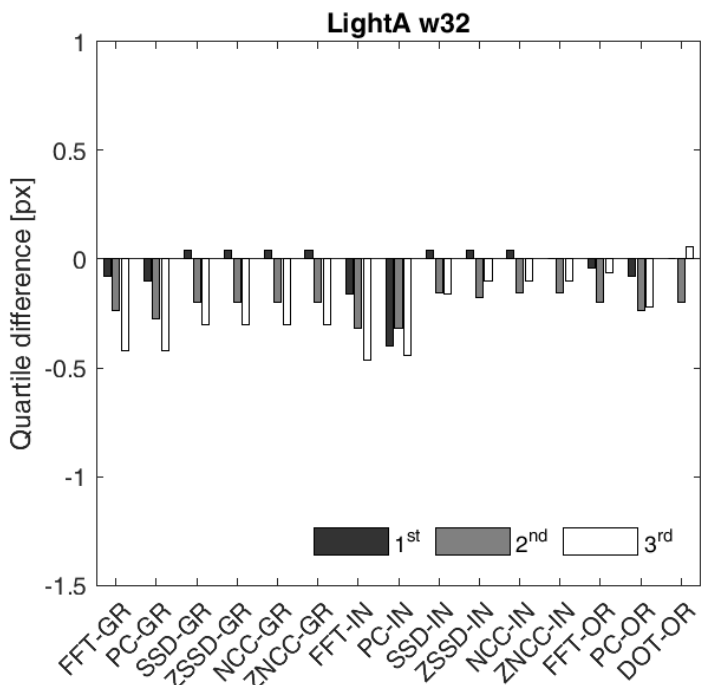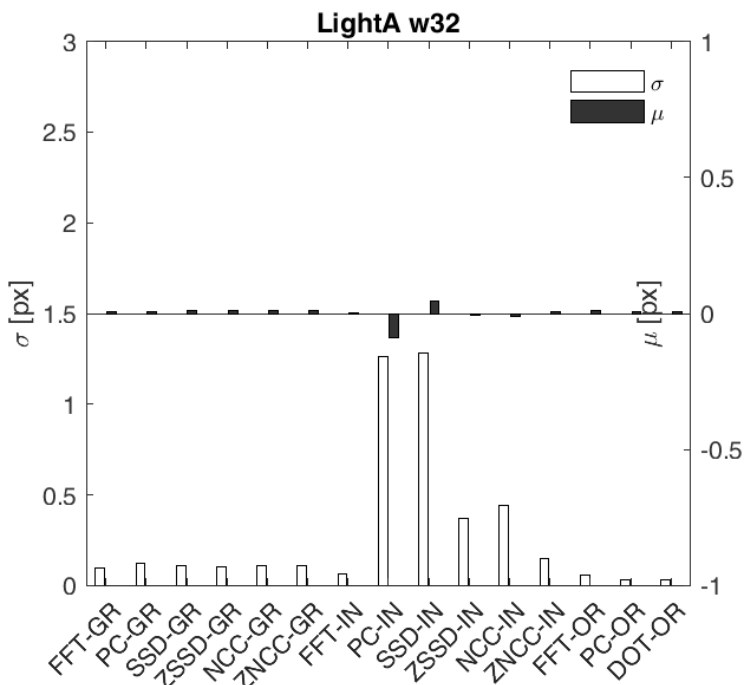

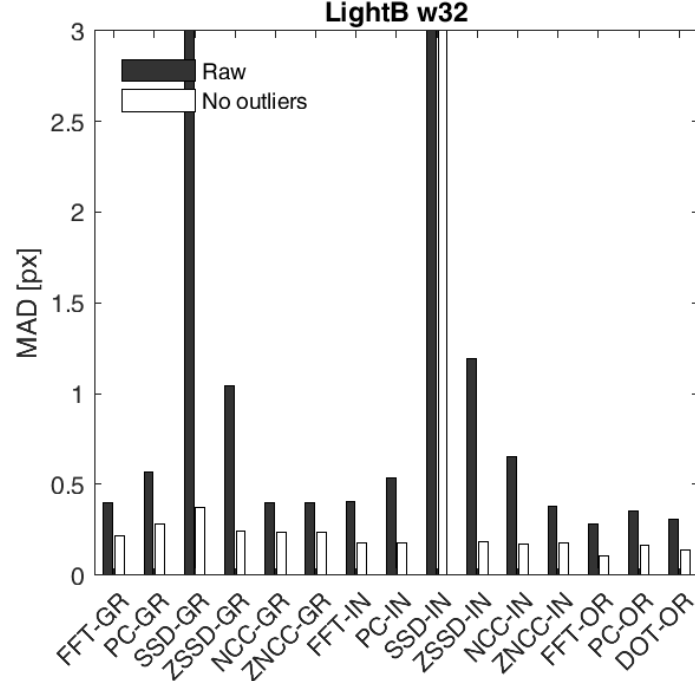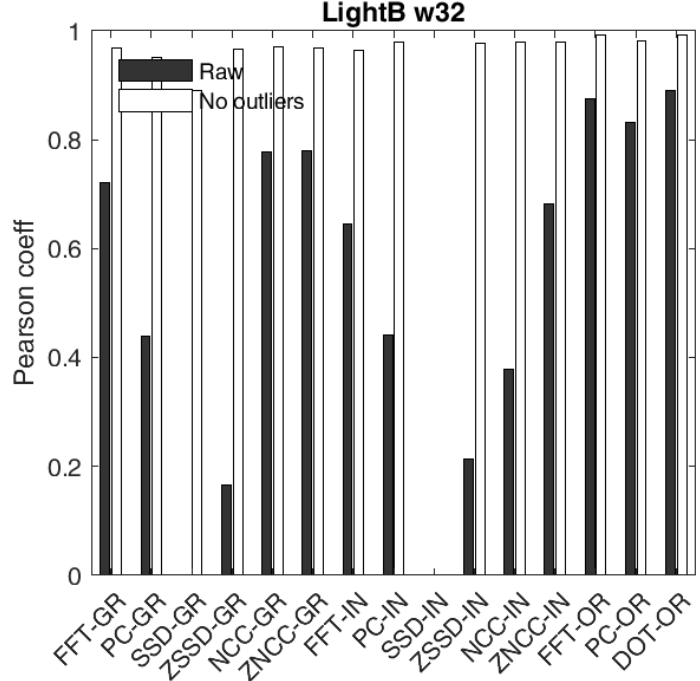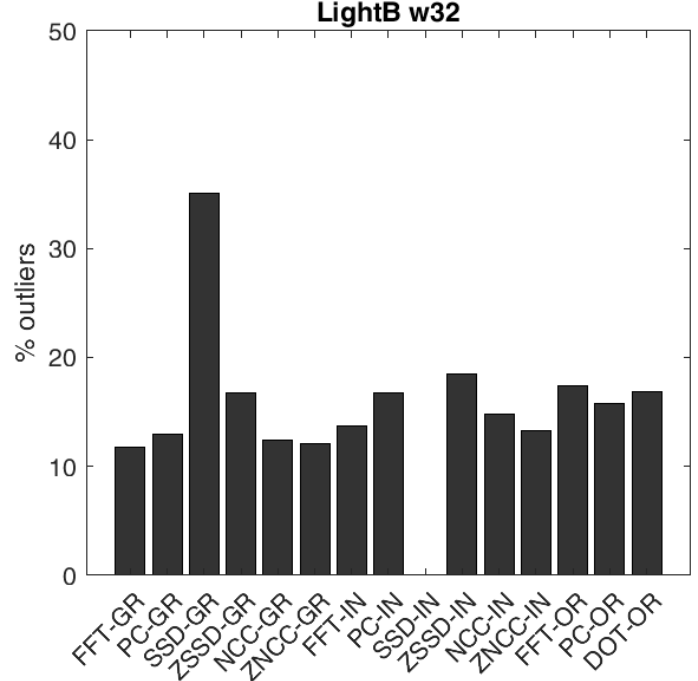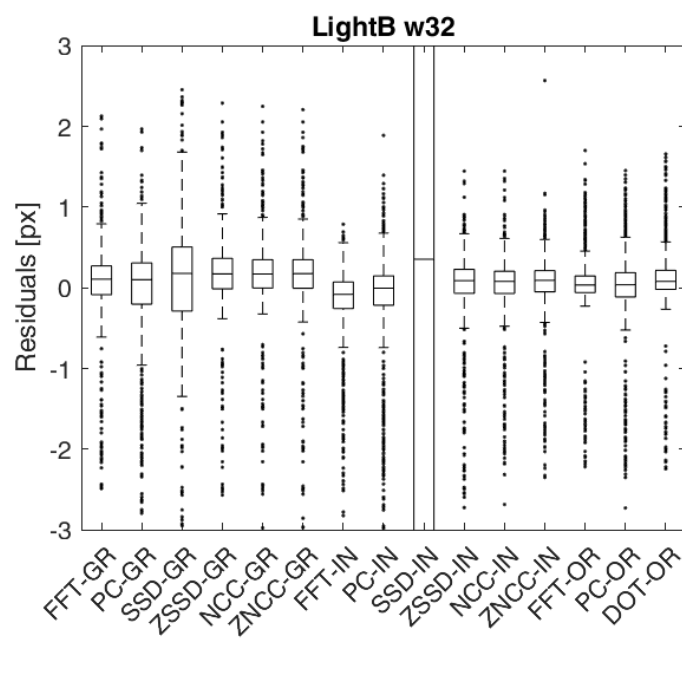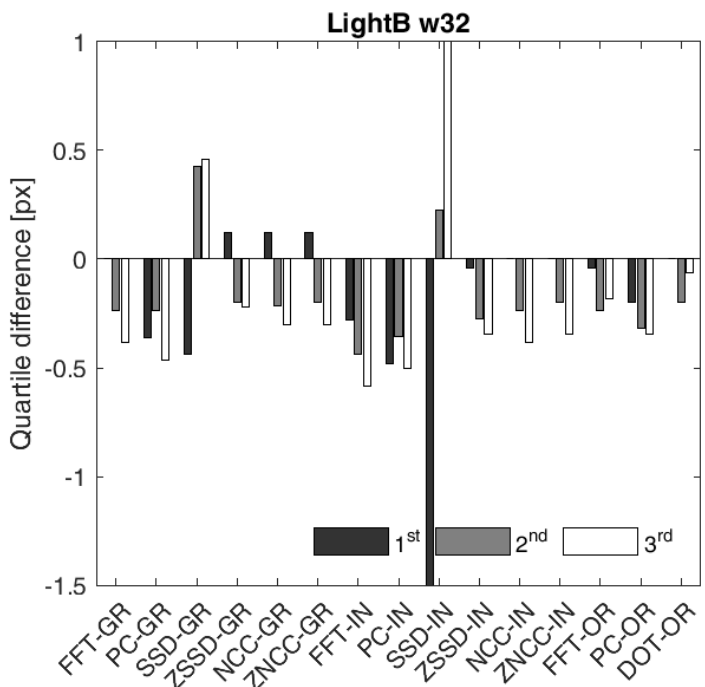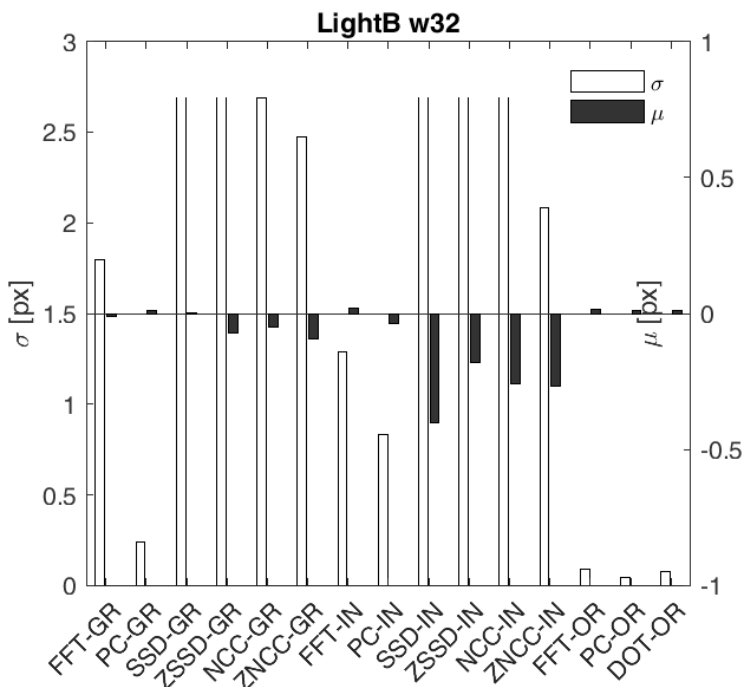

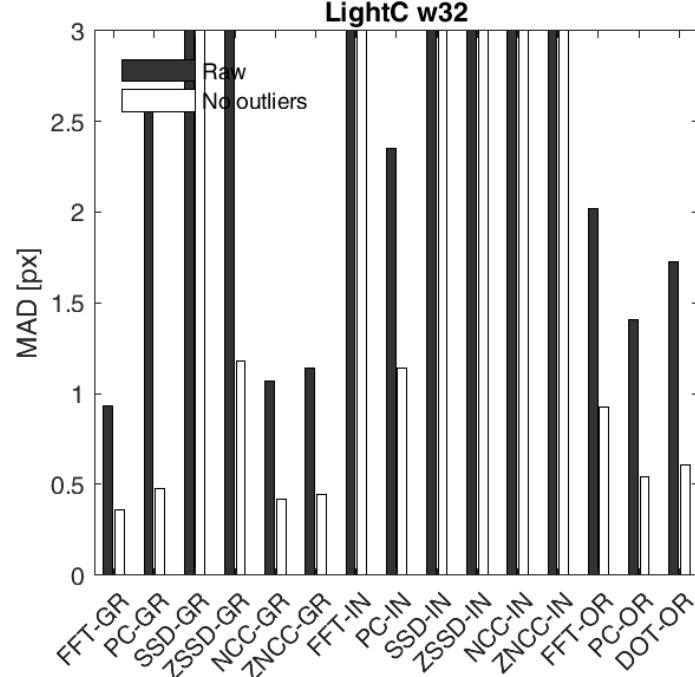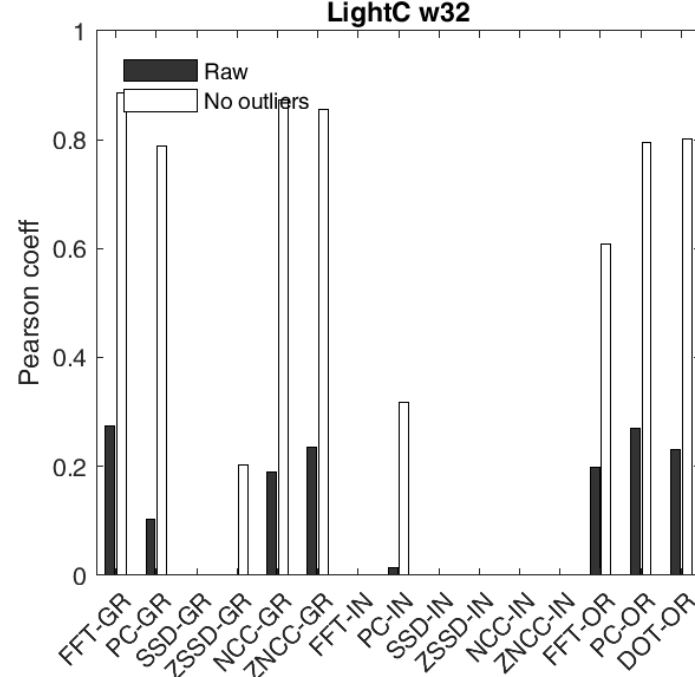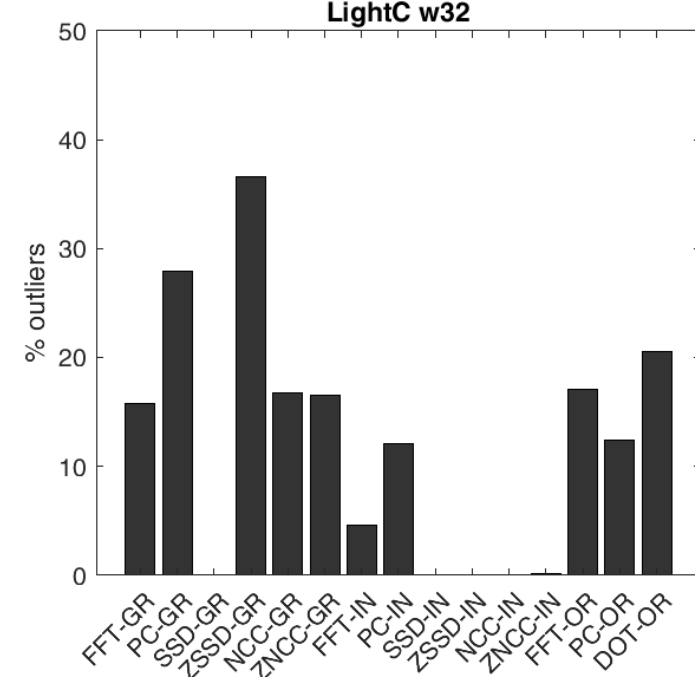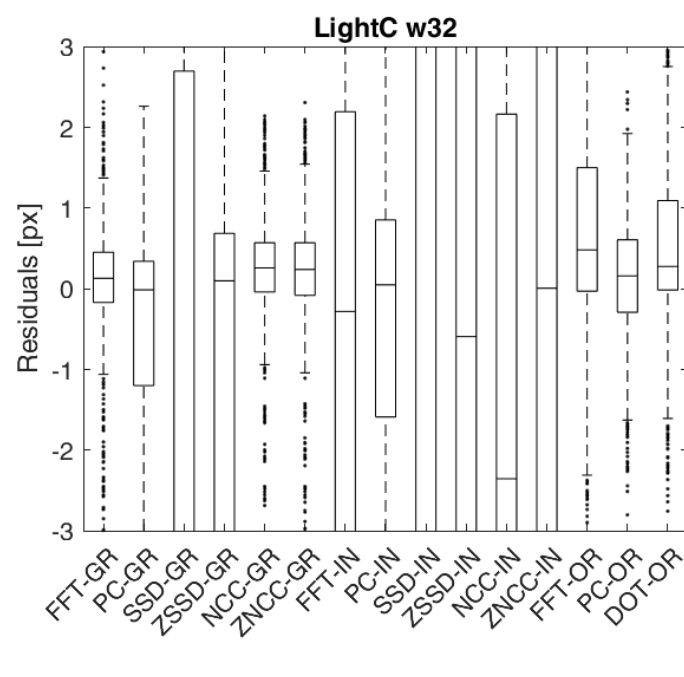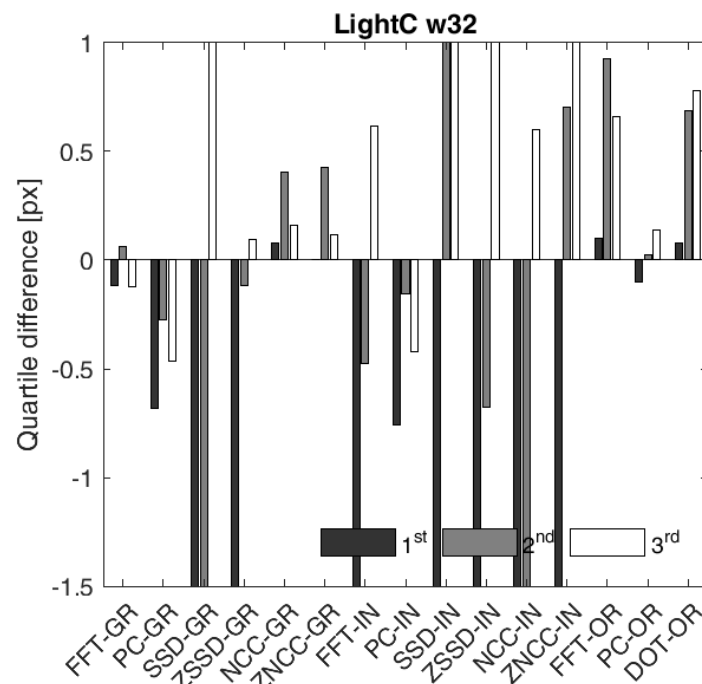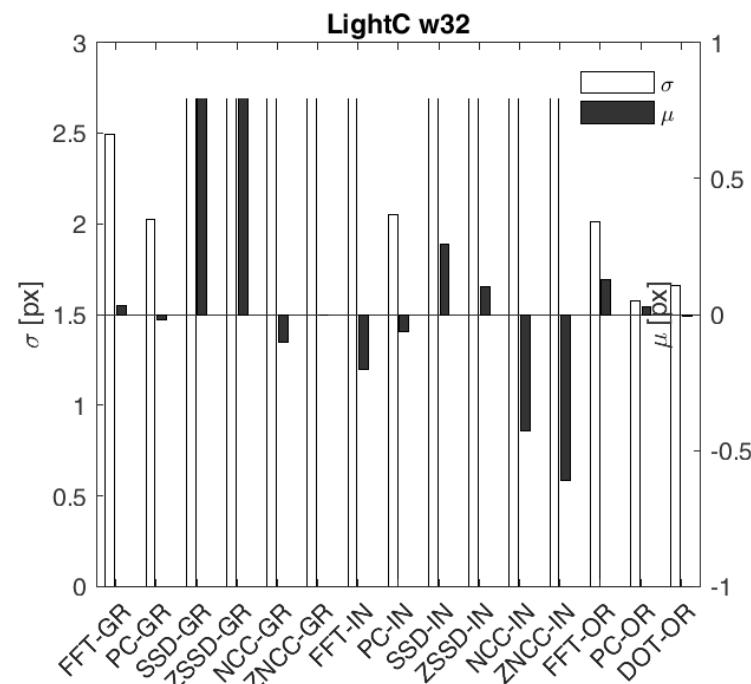

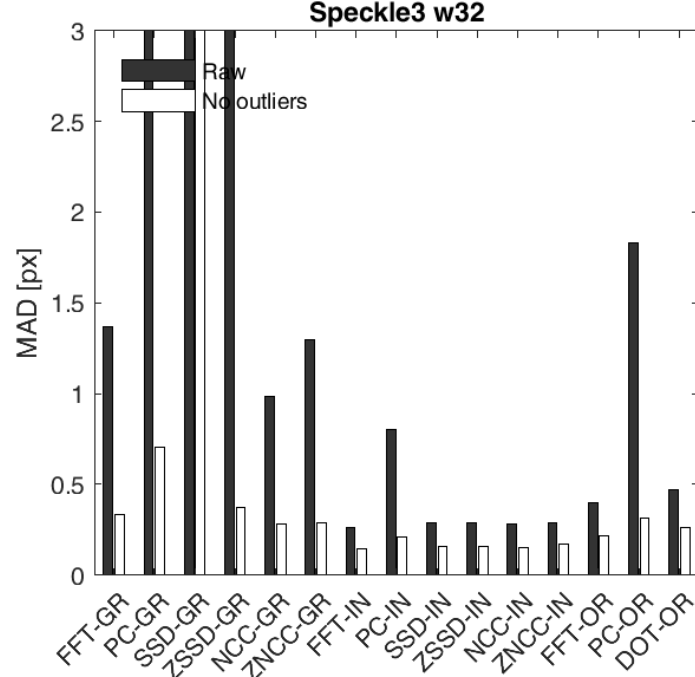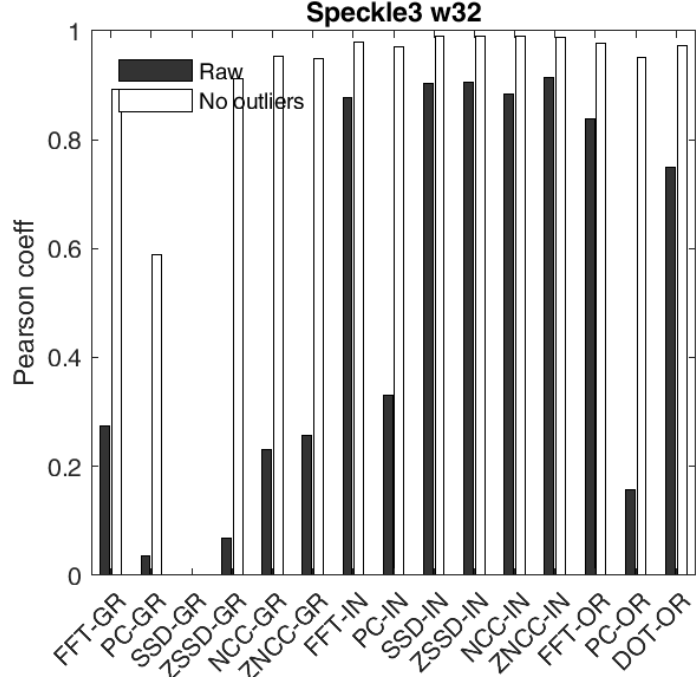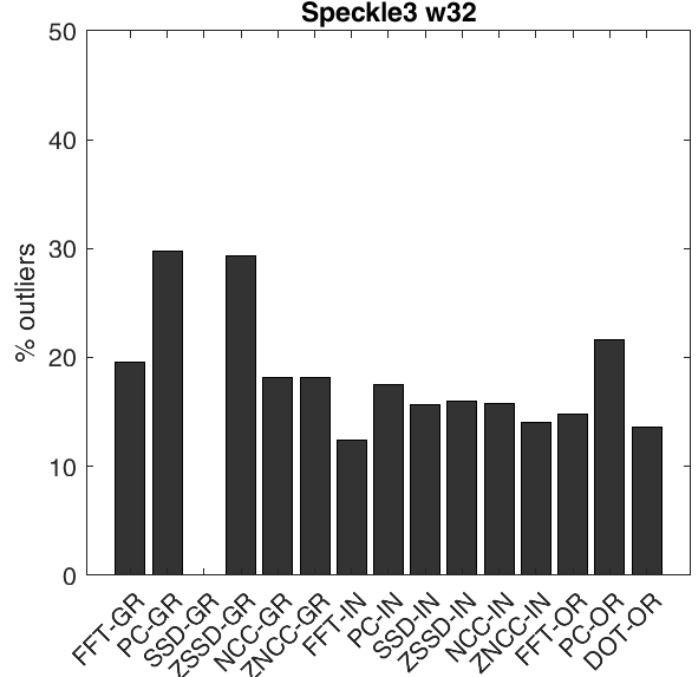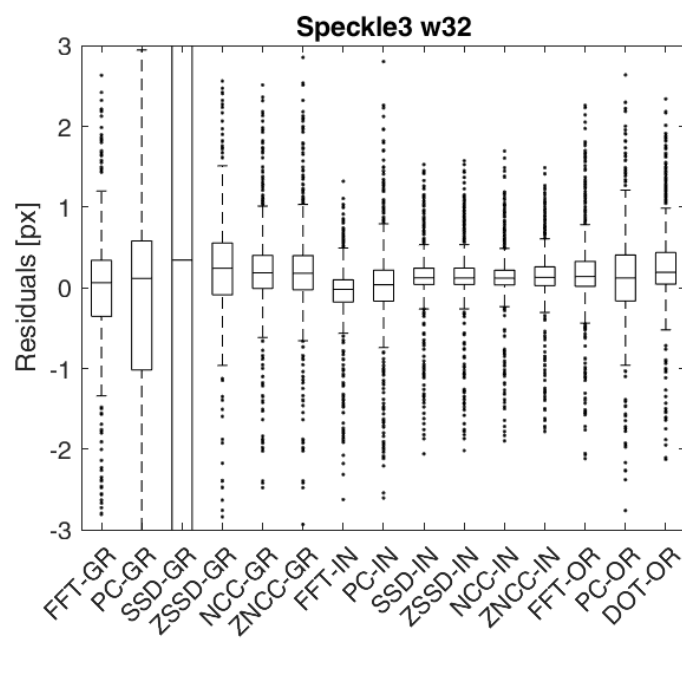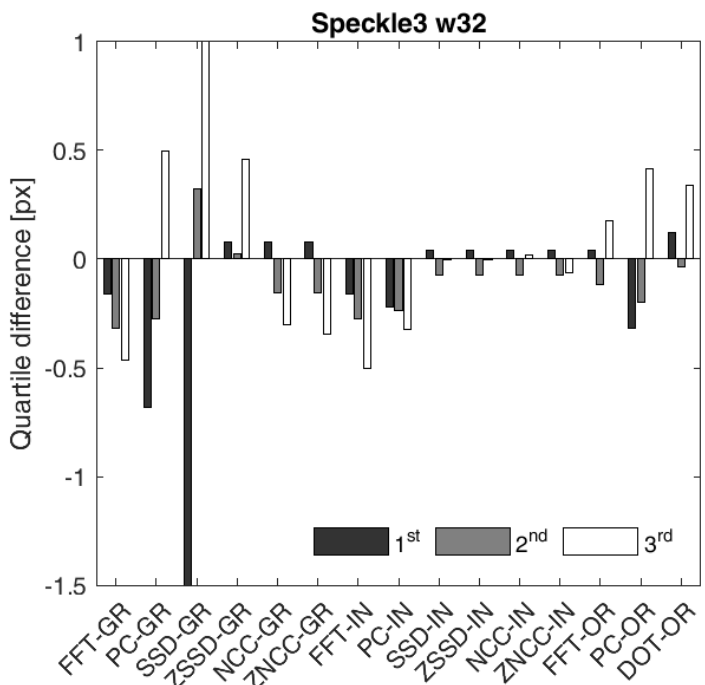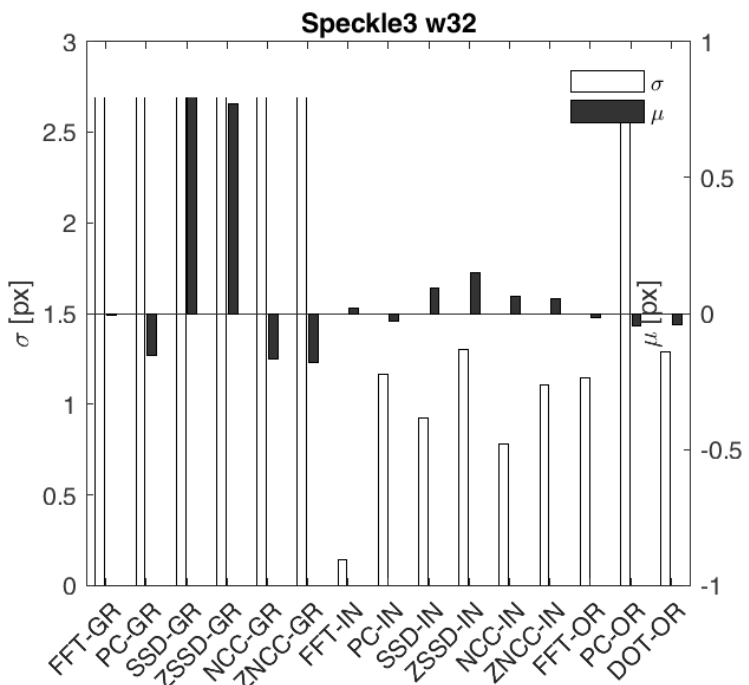



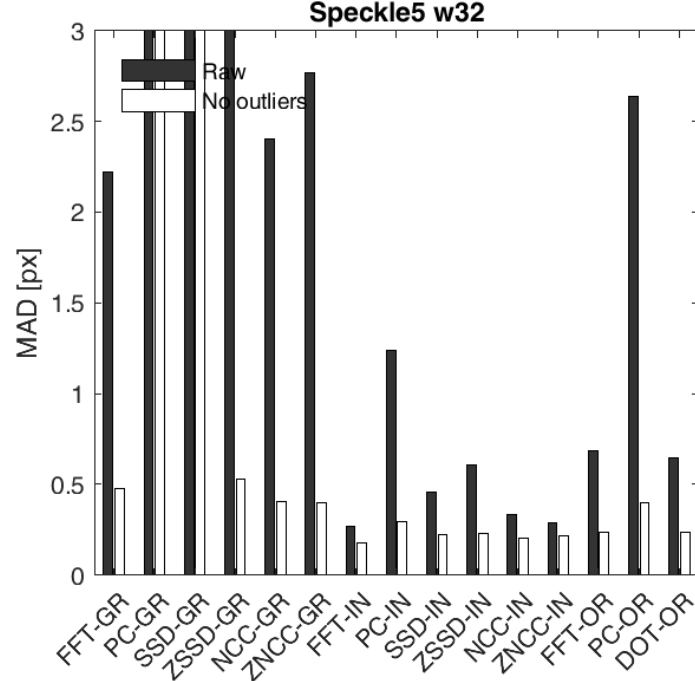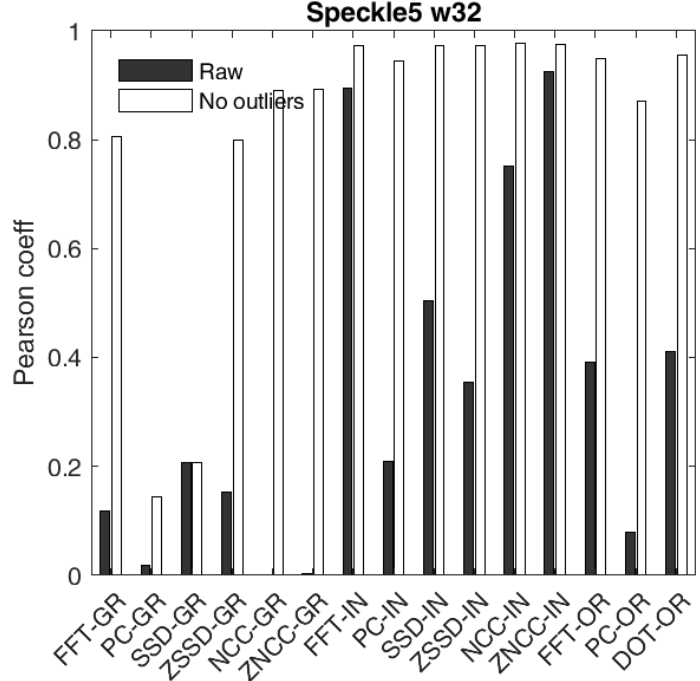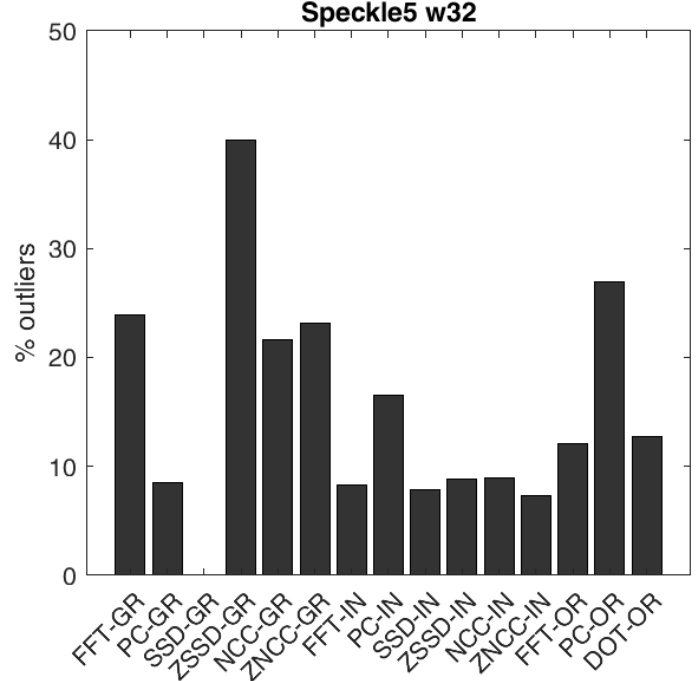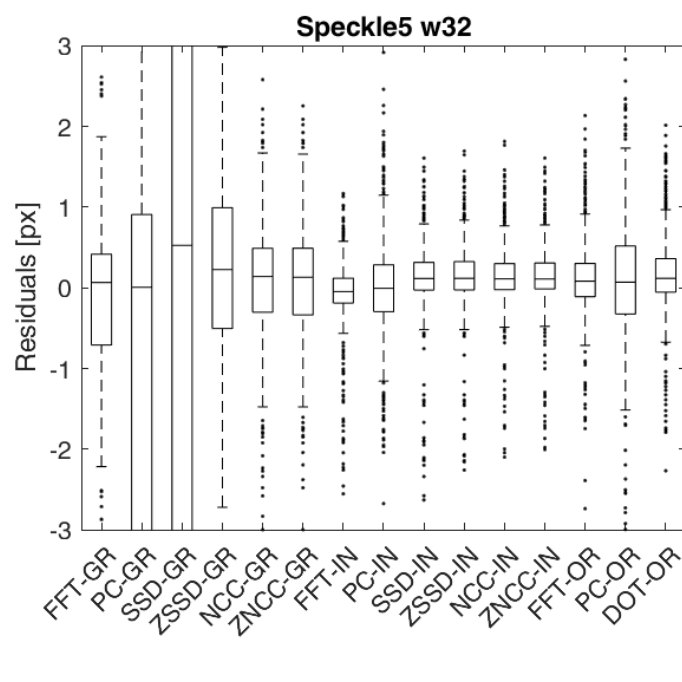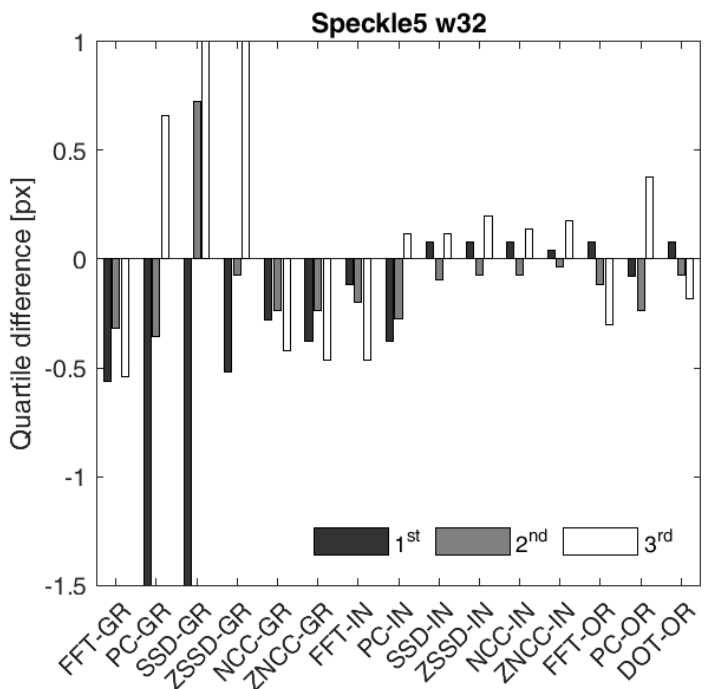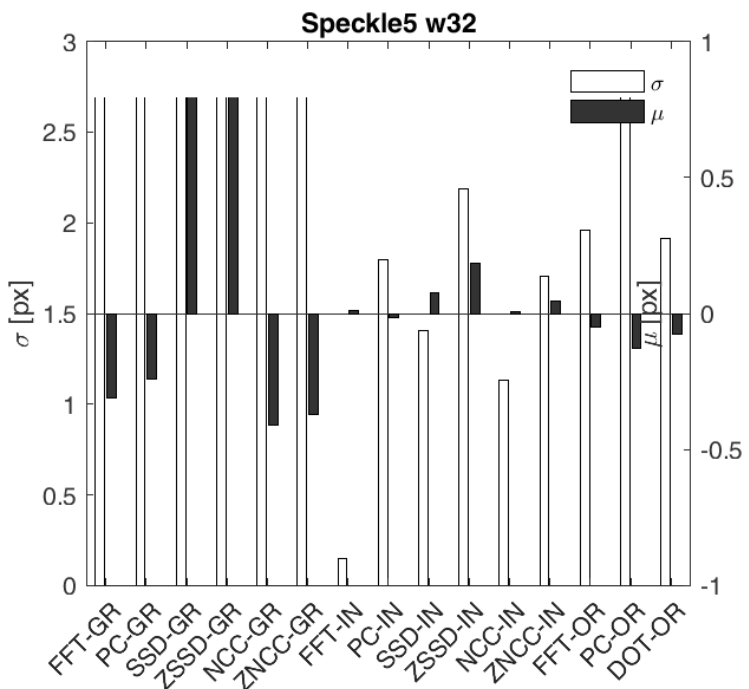

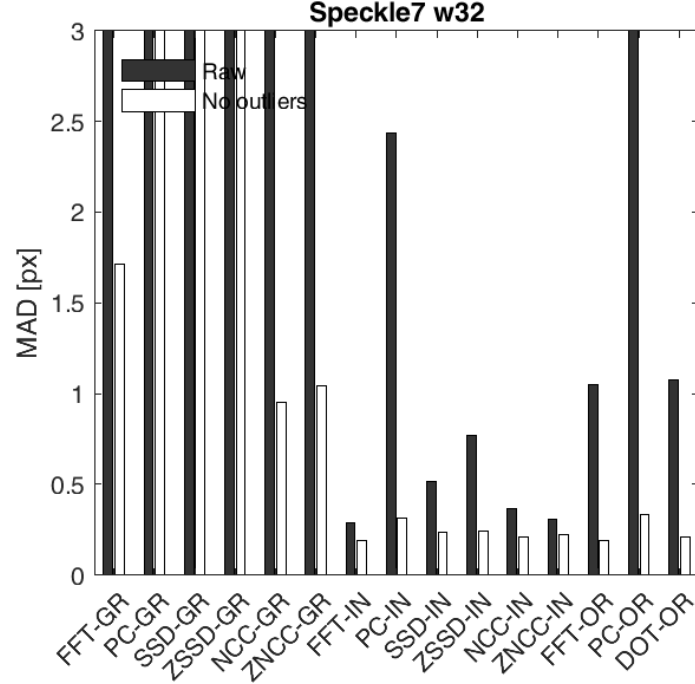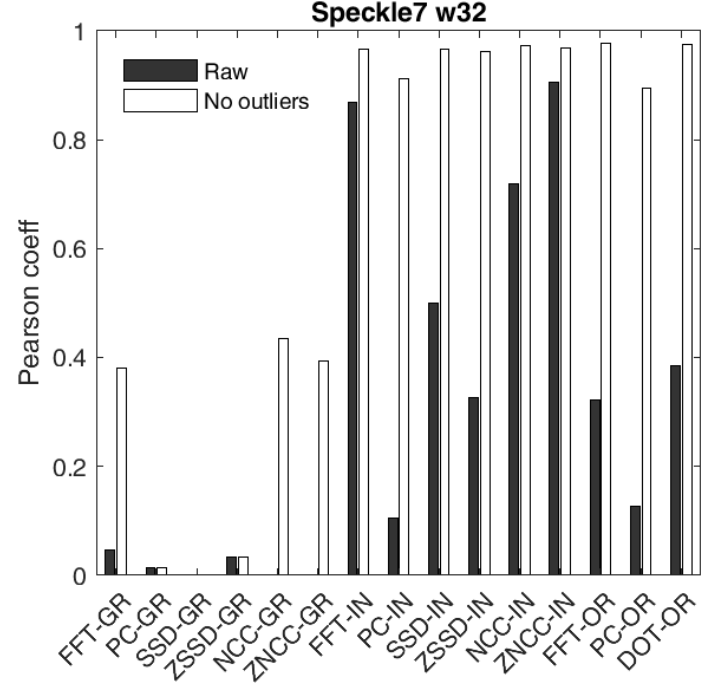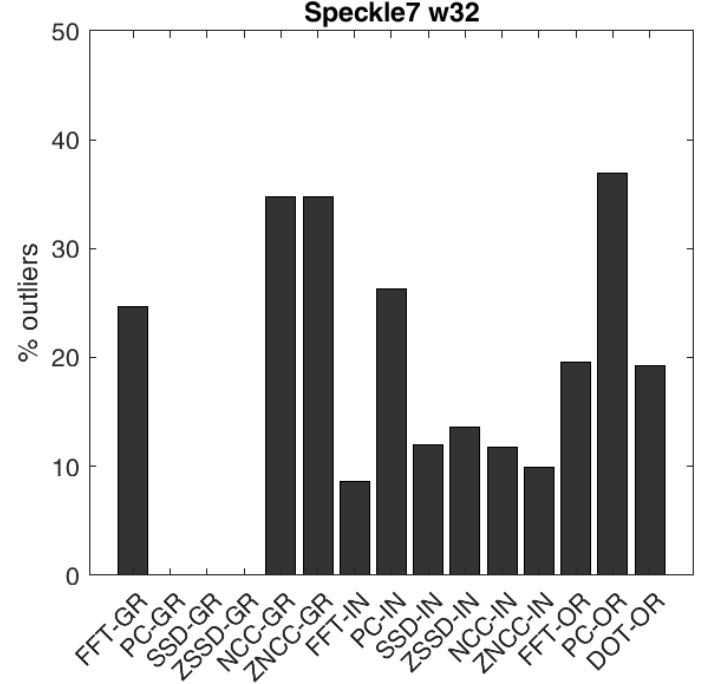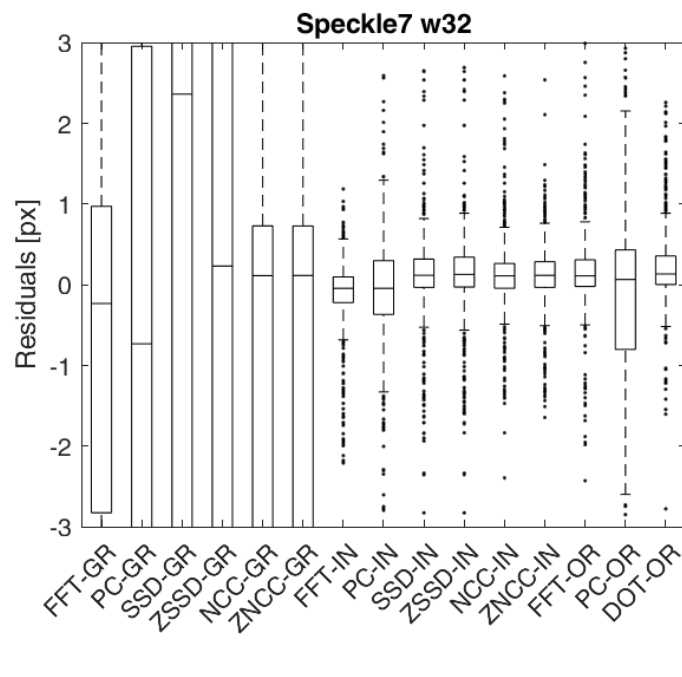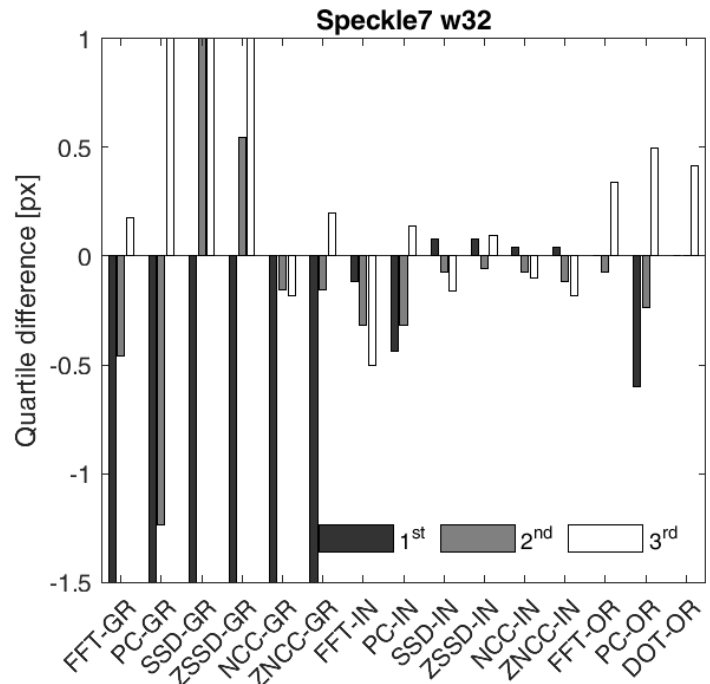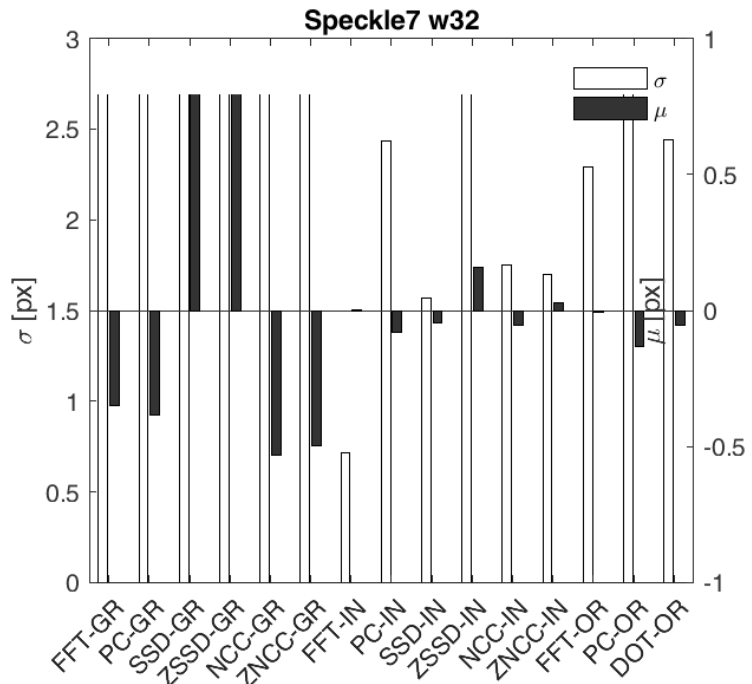

Template size 64x64

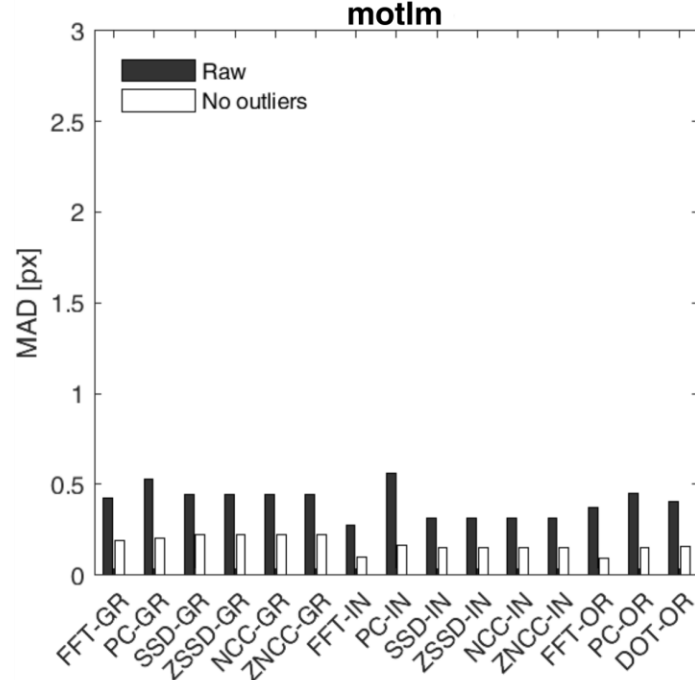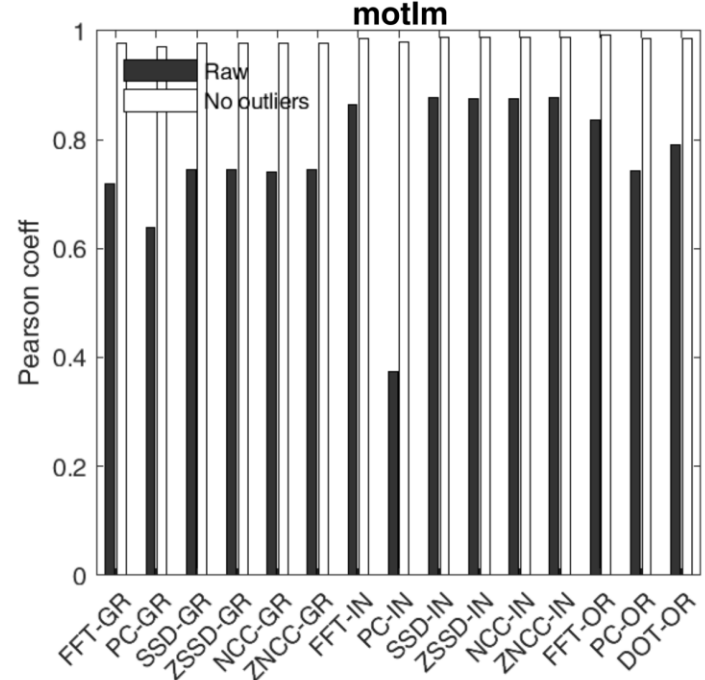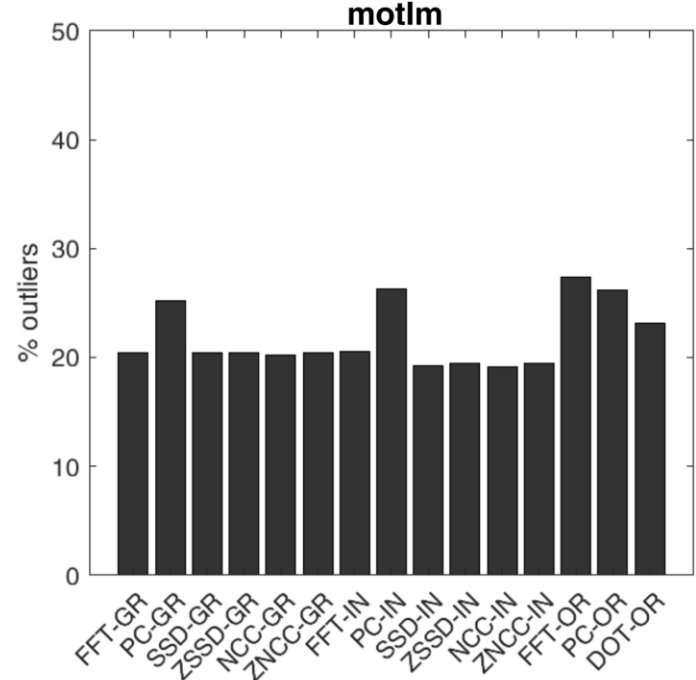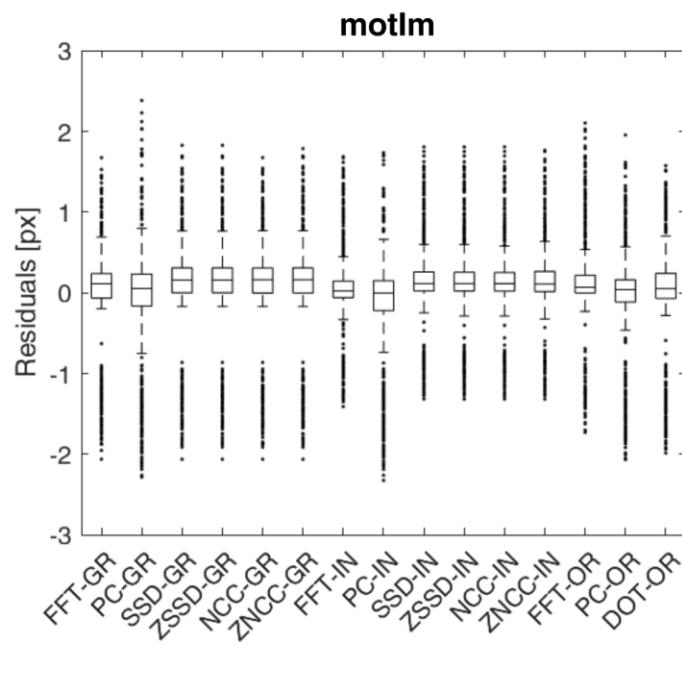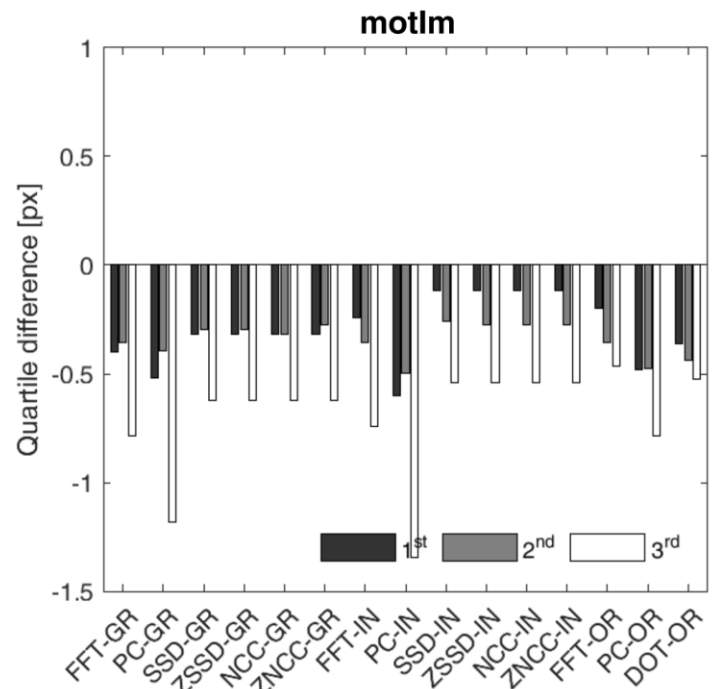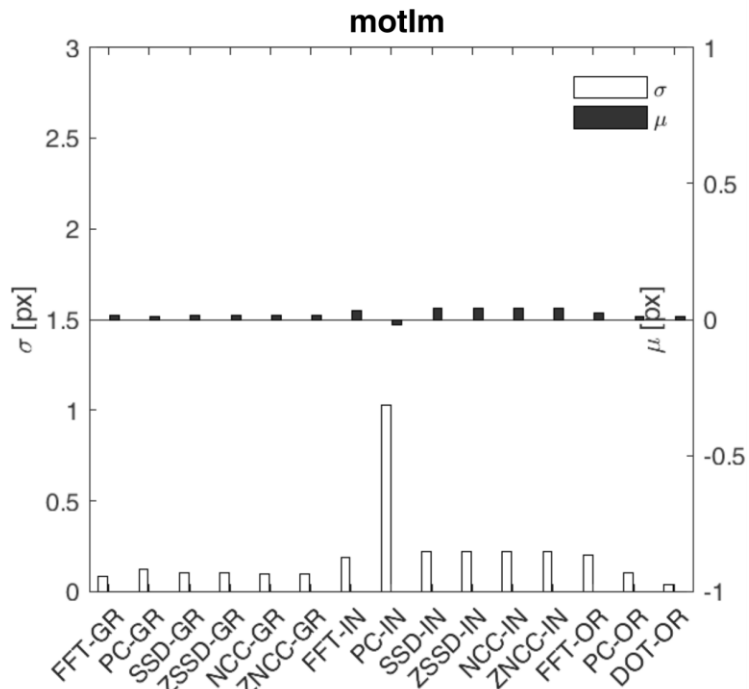

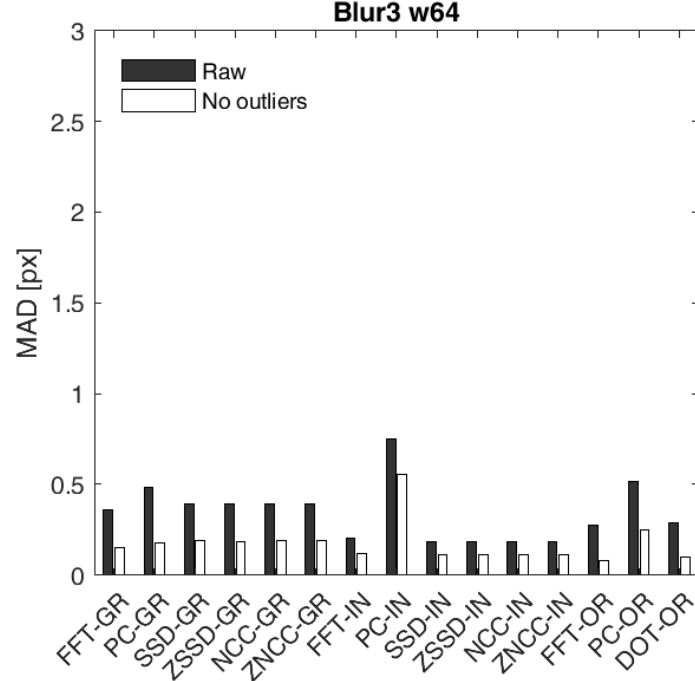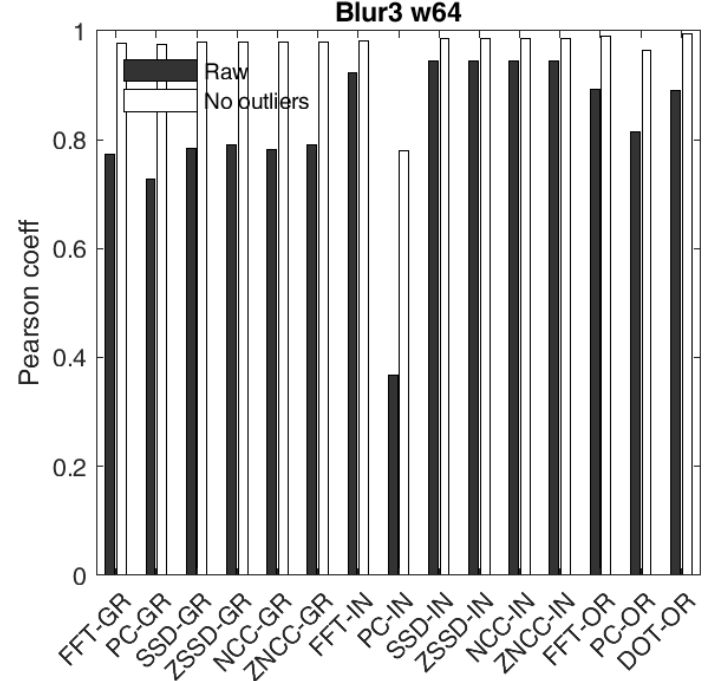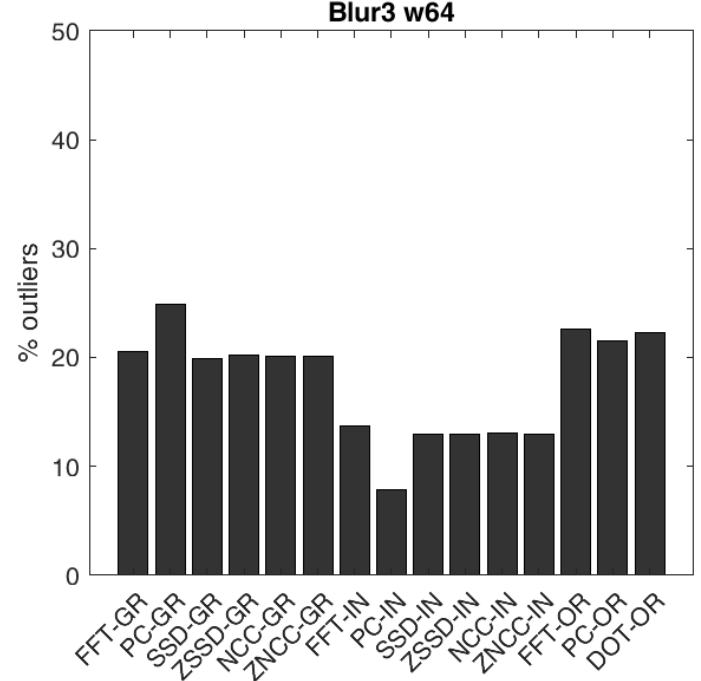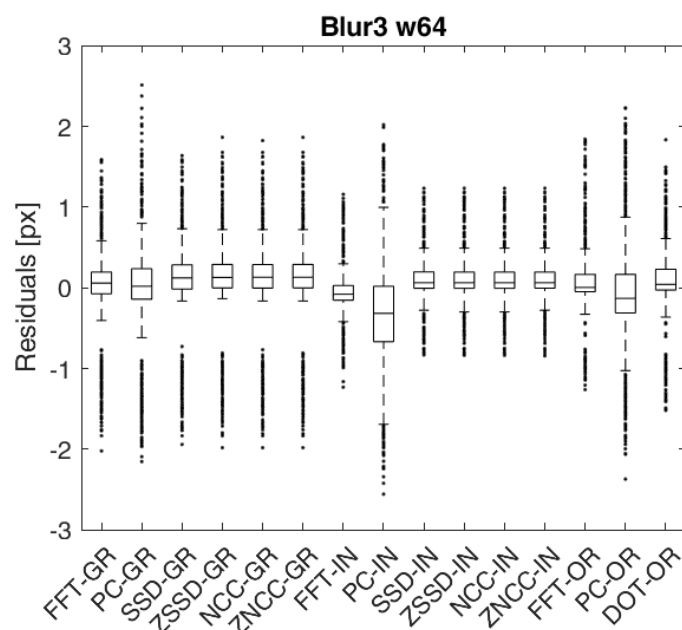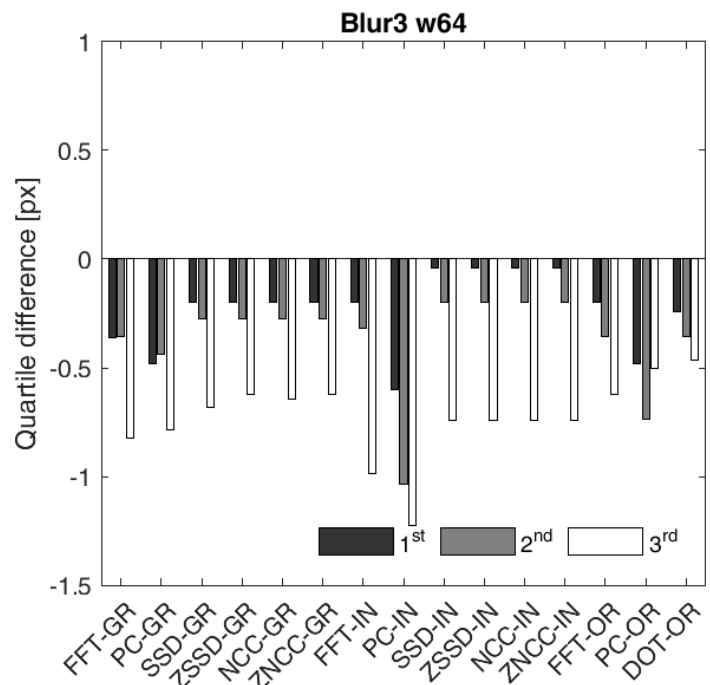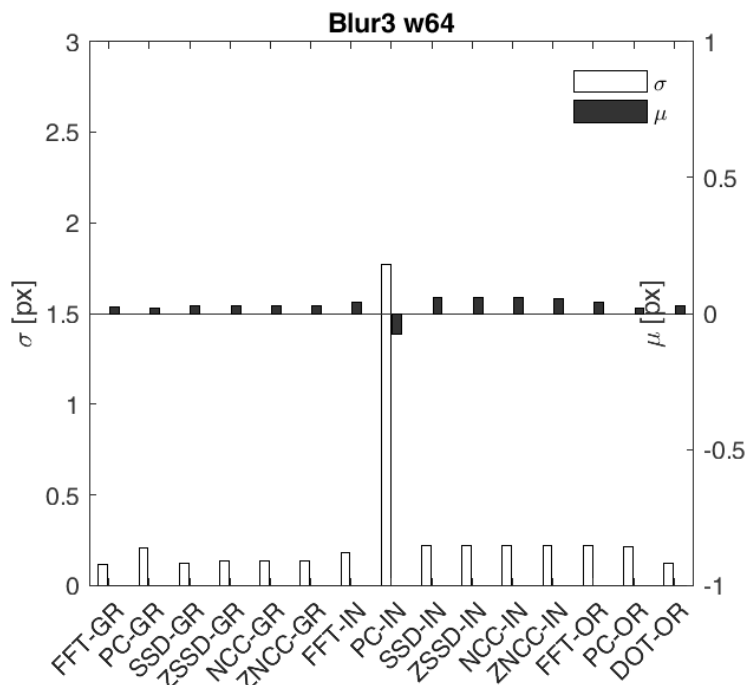

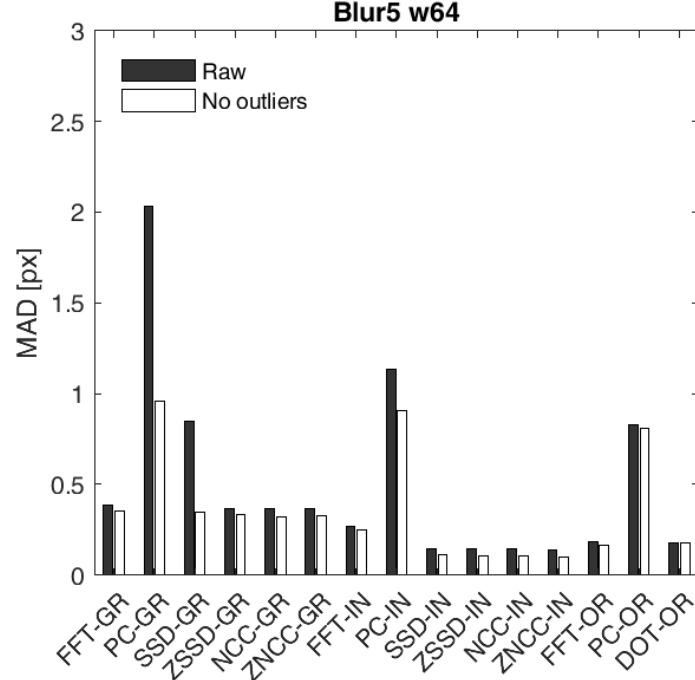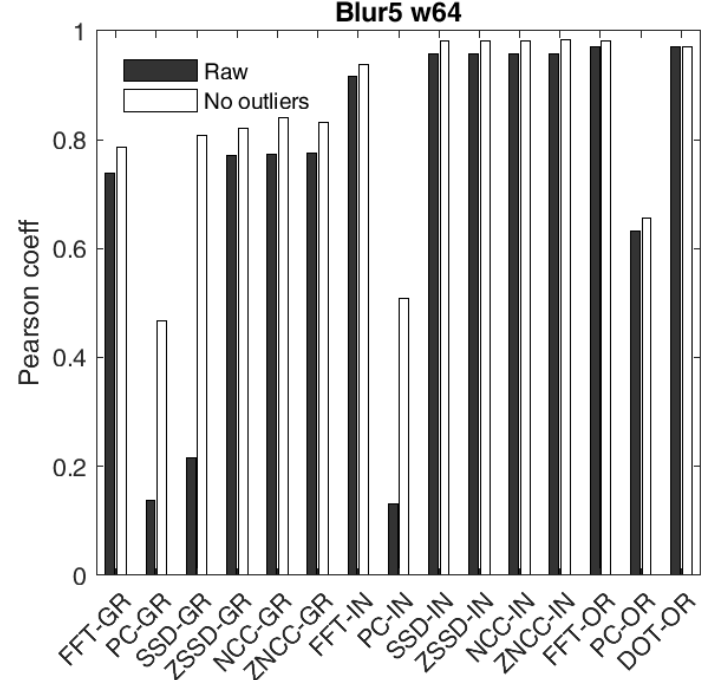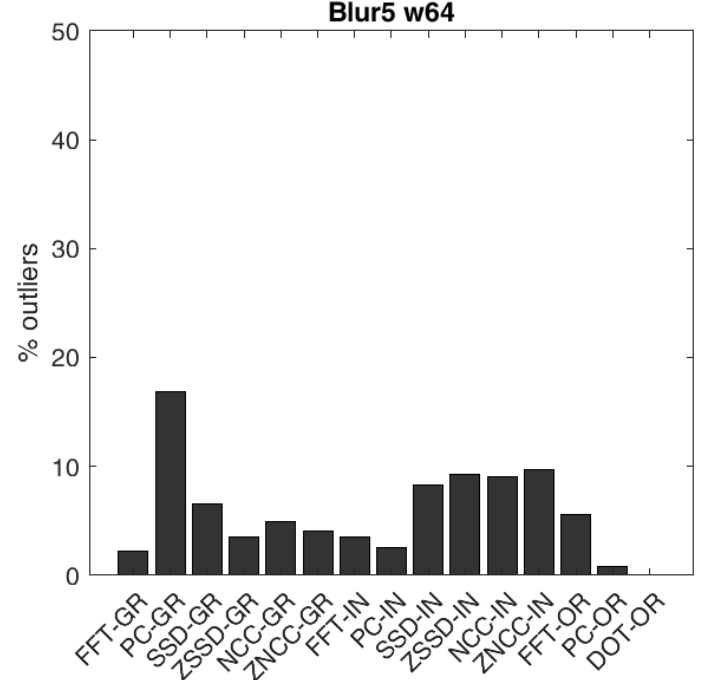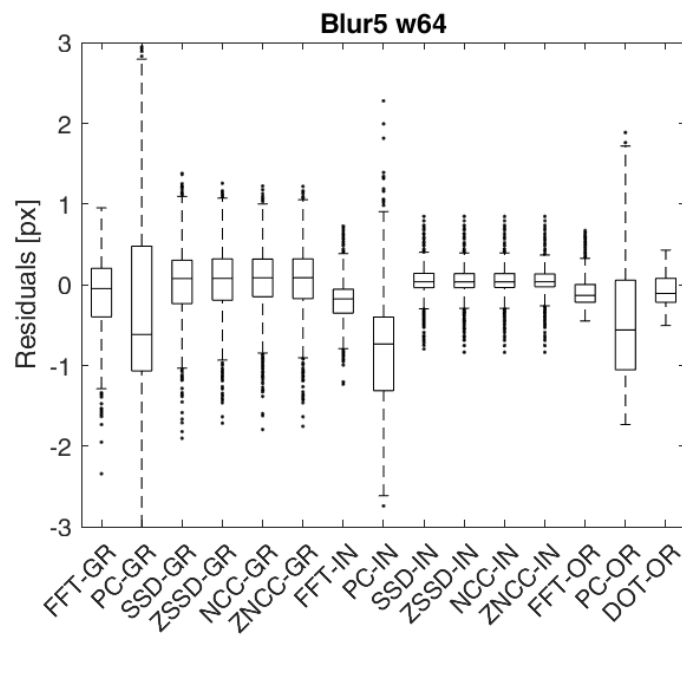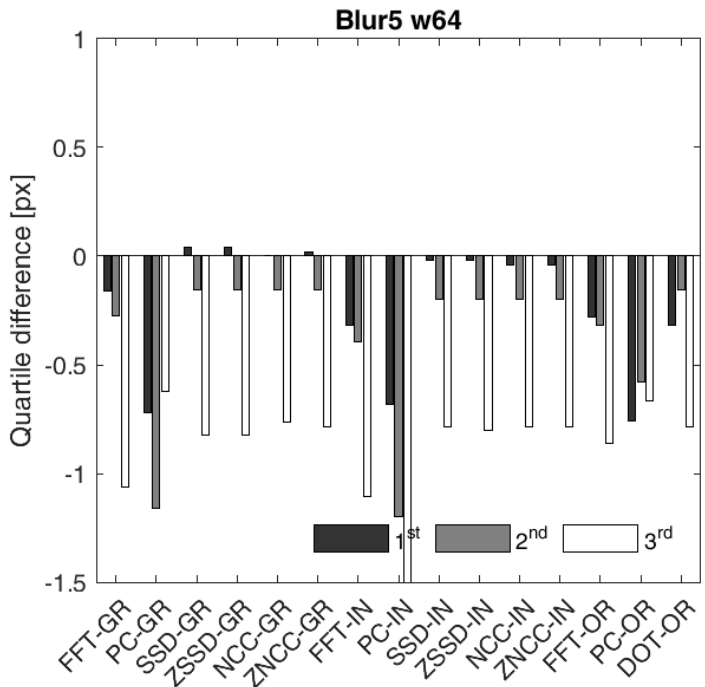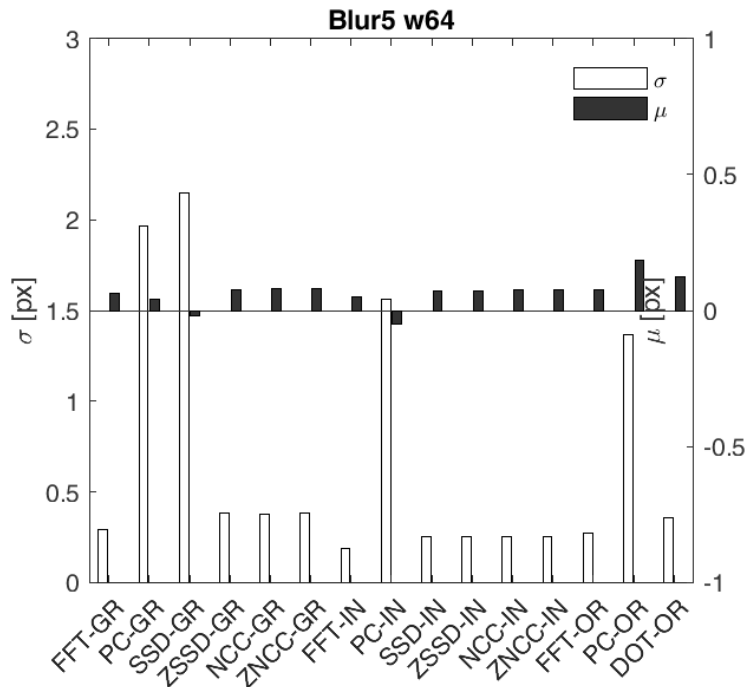

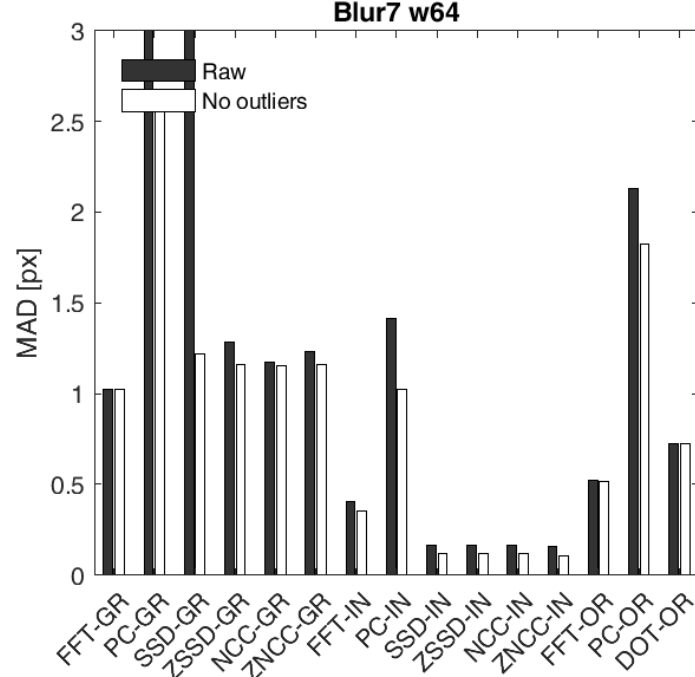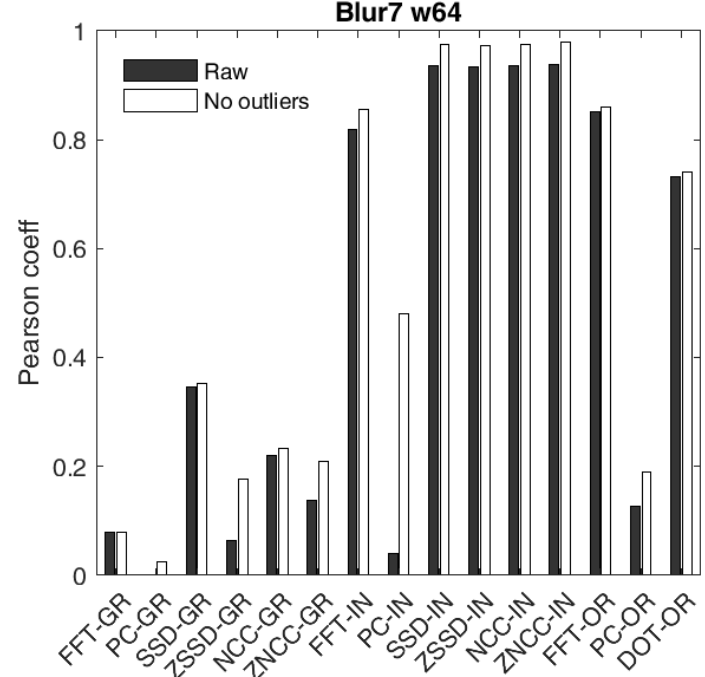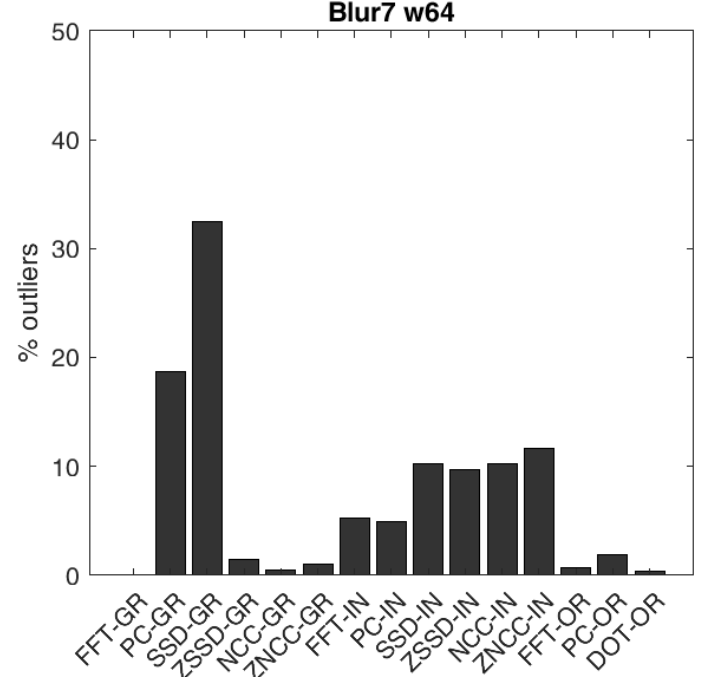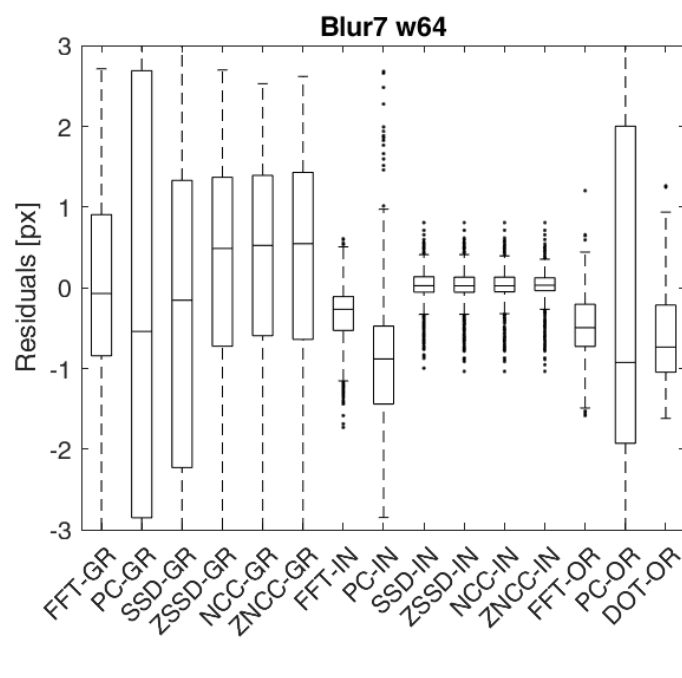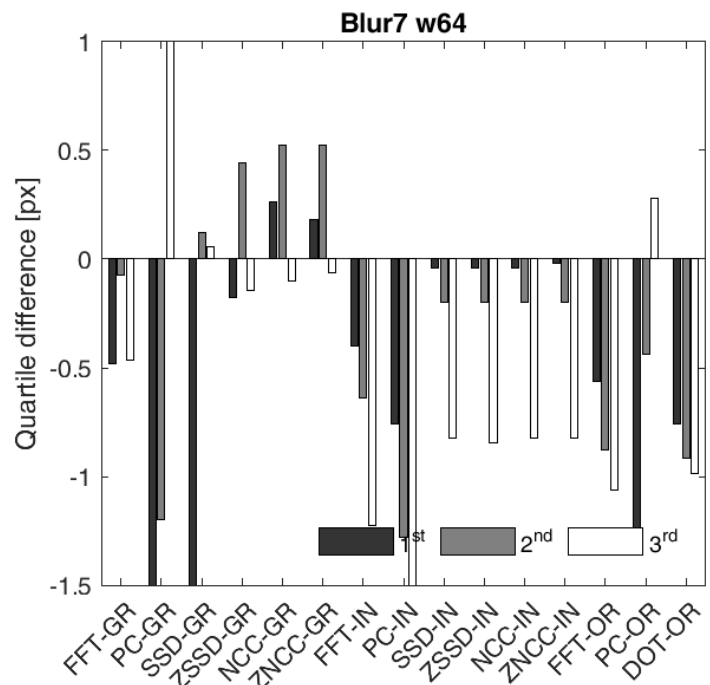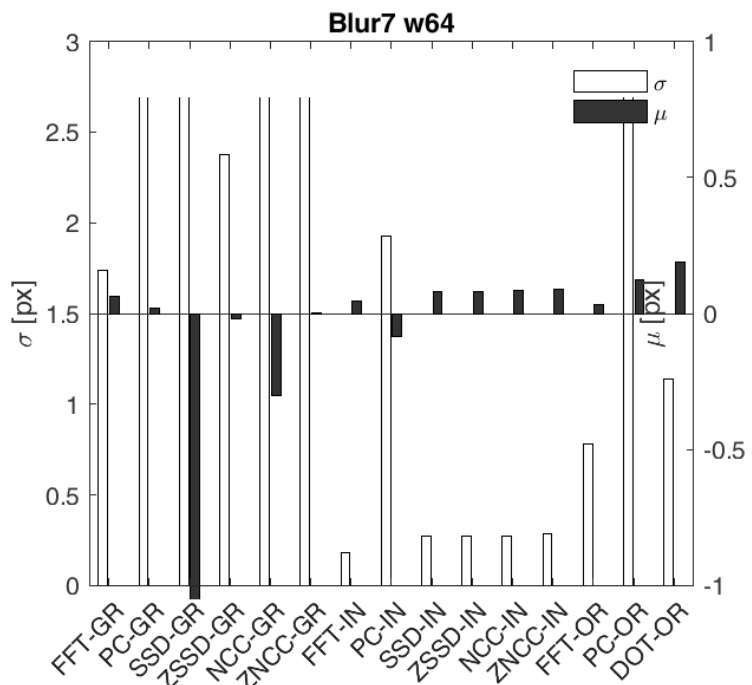

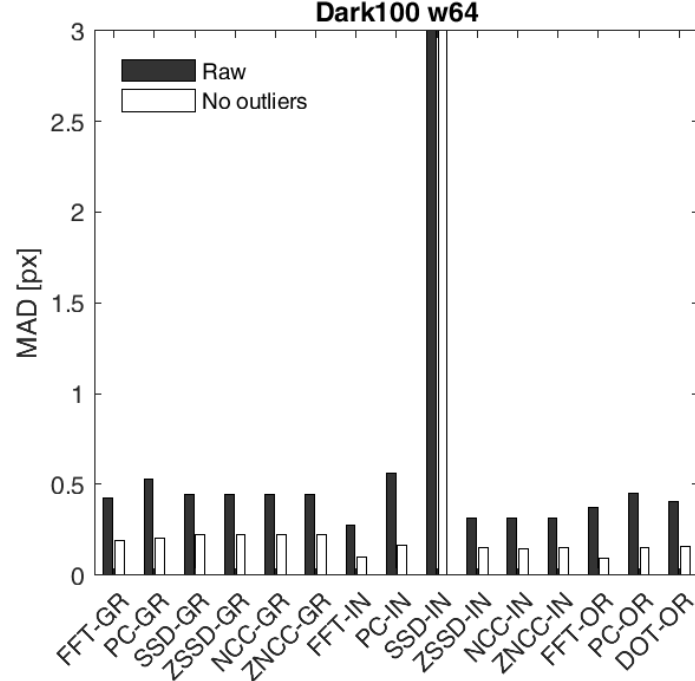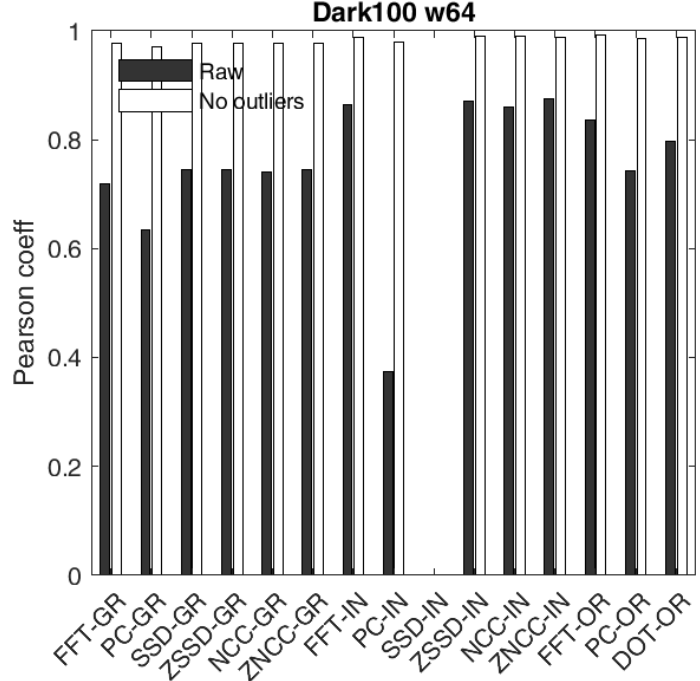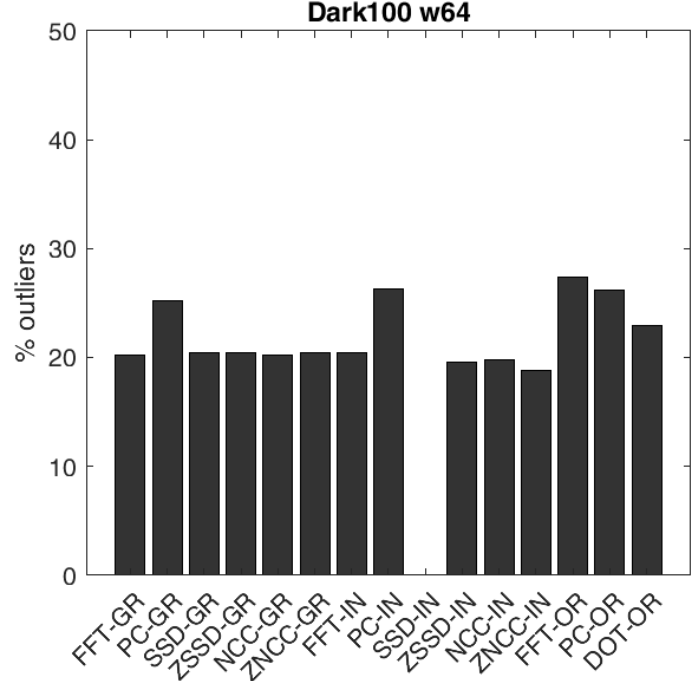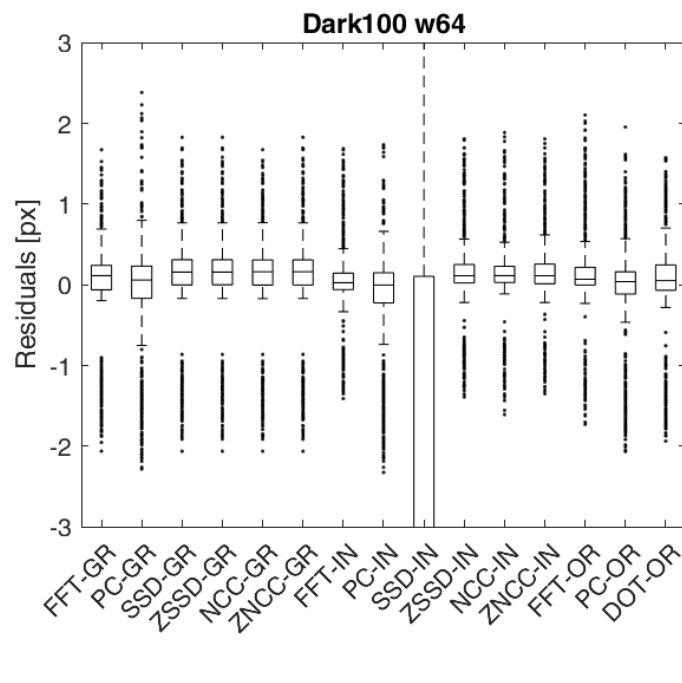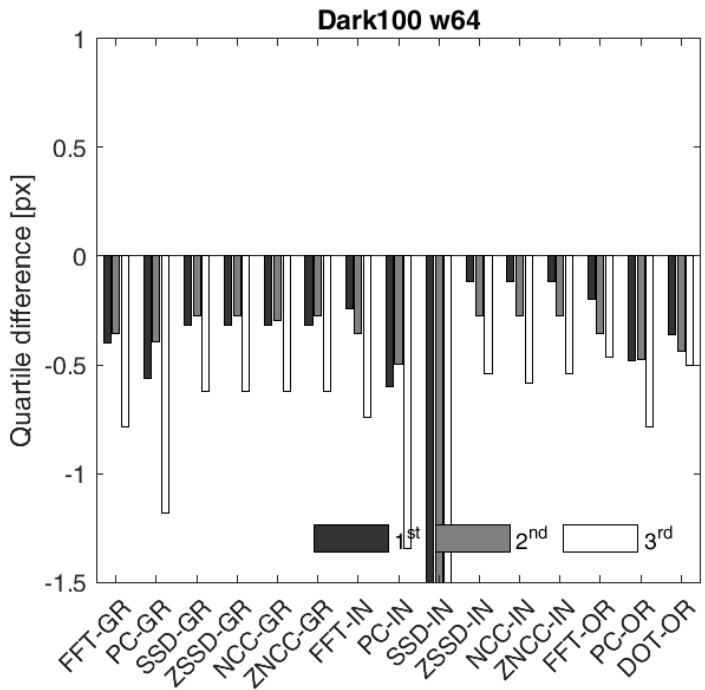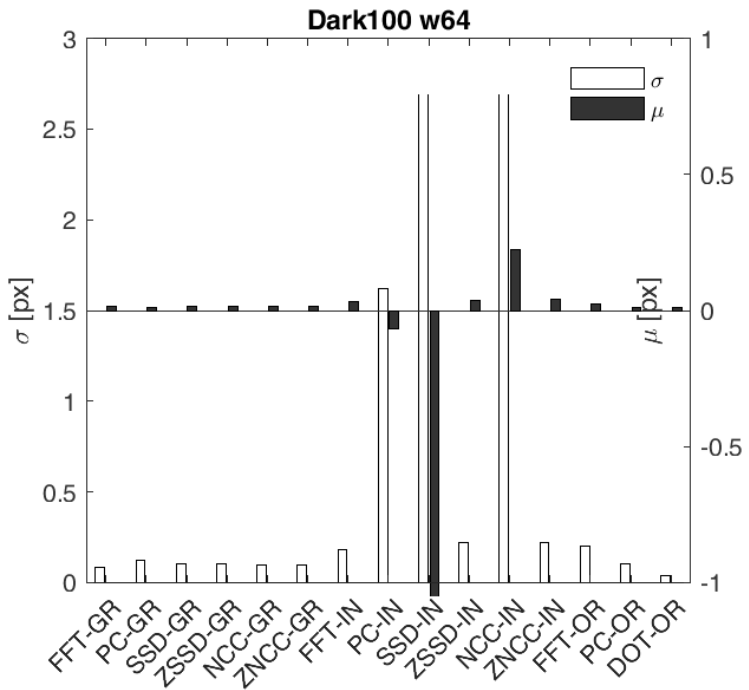



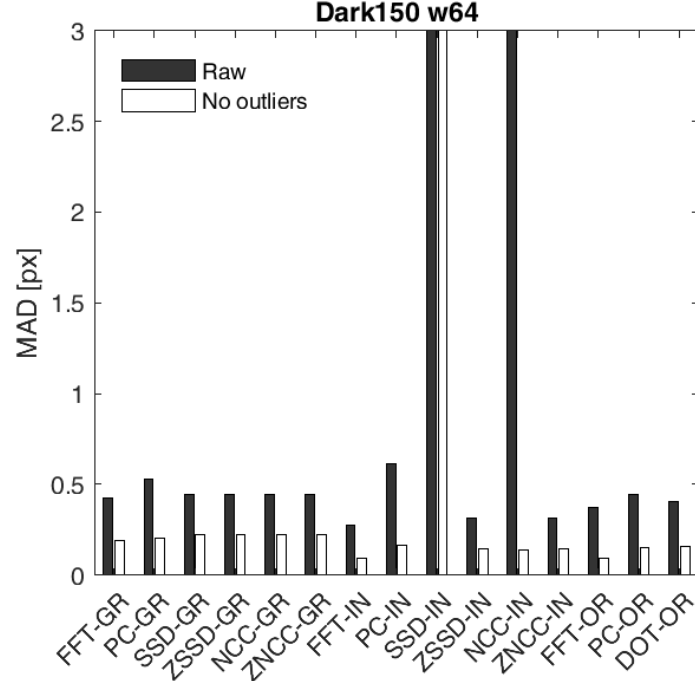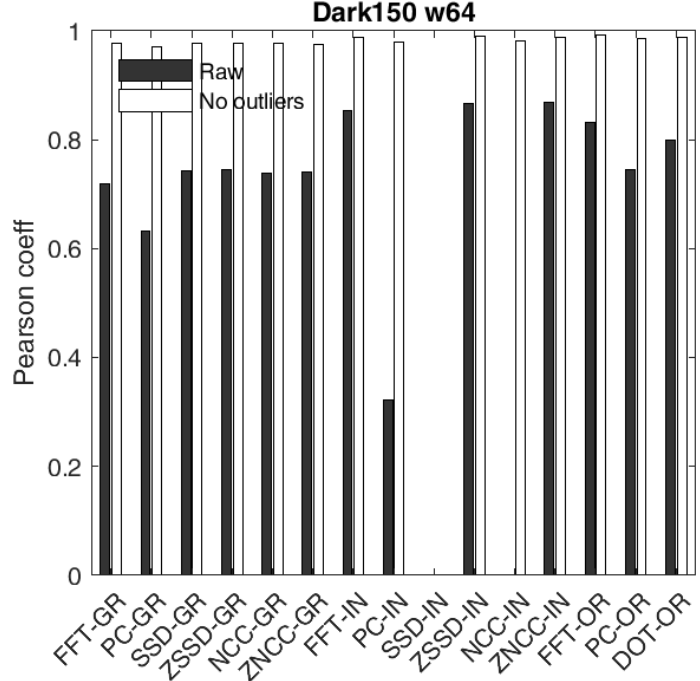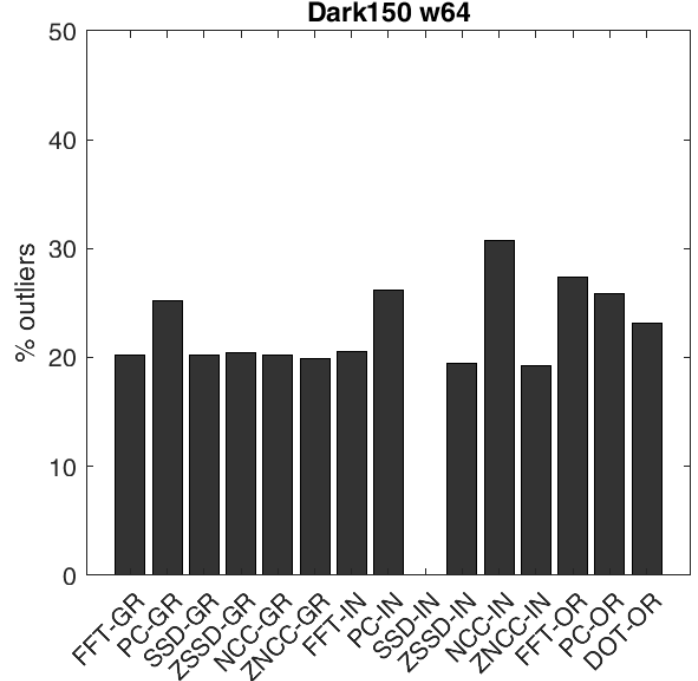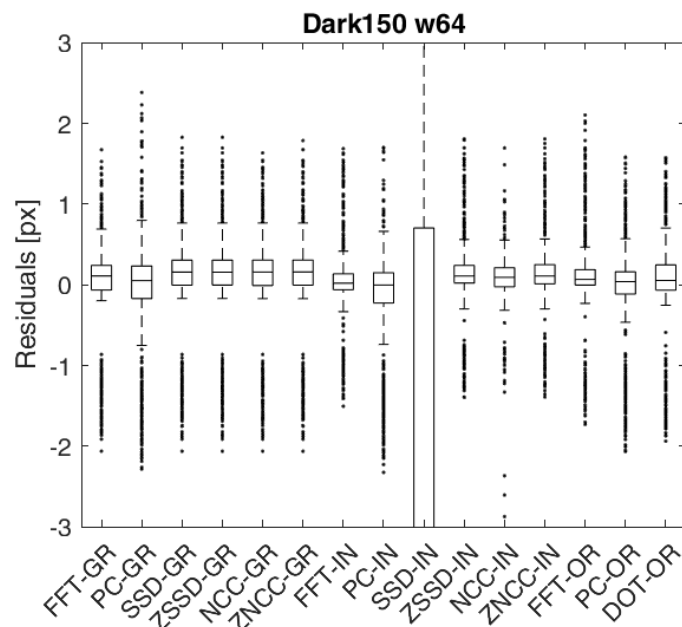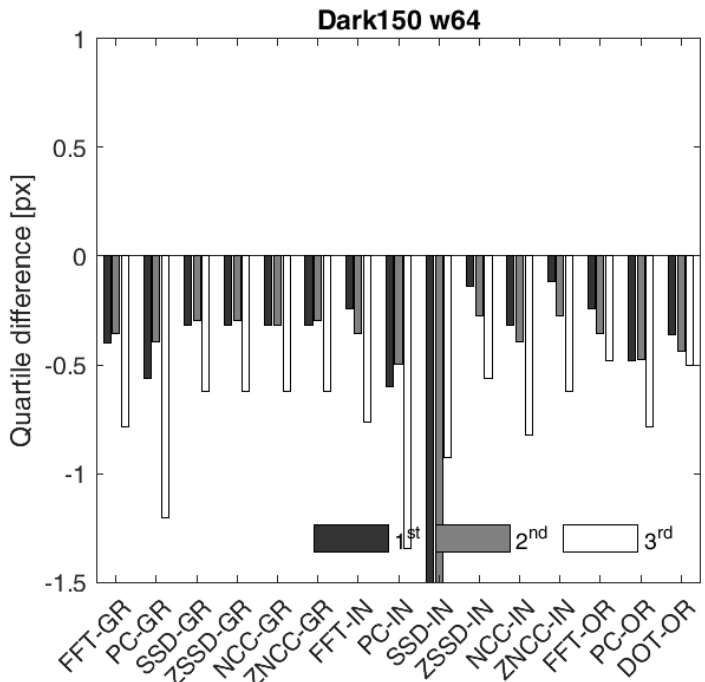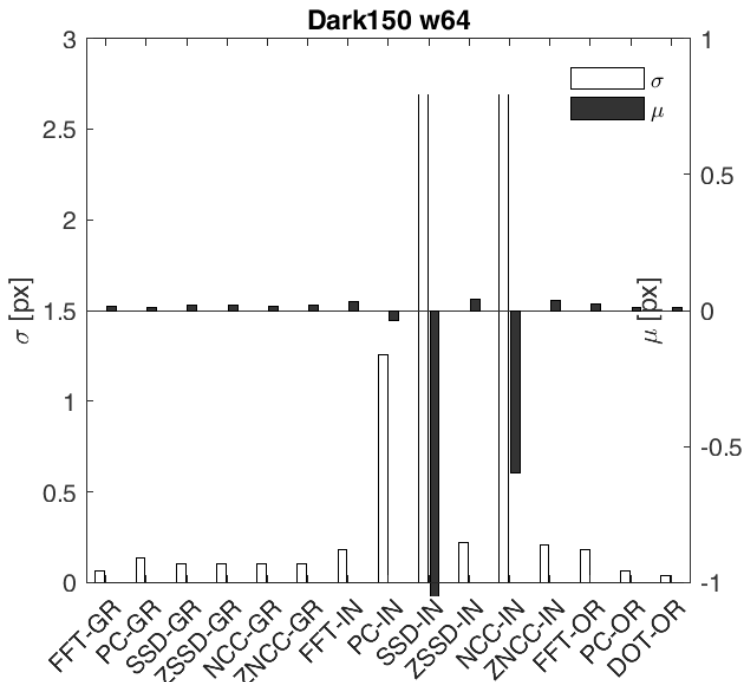

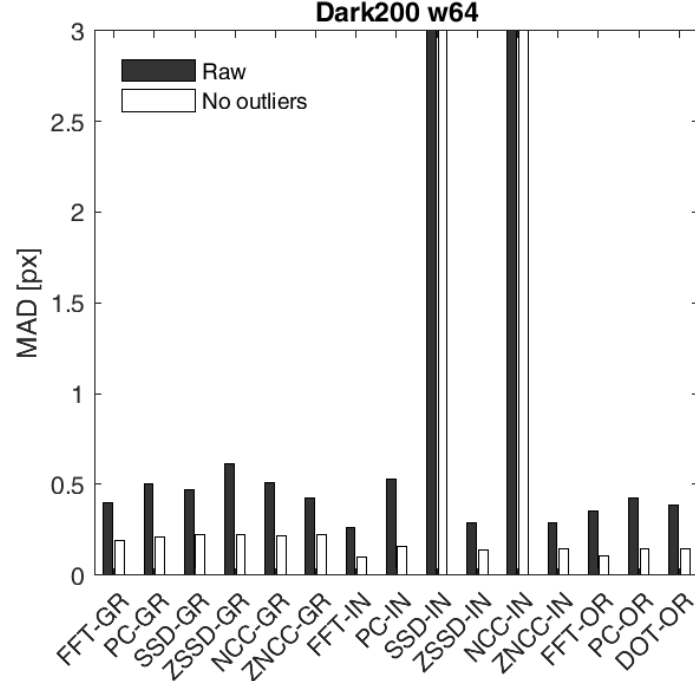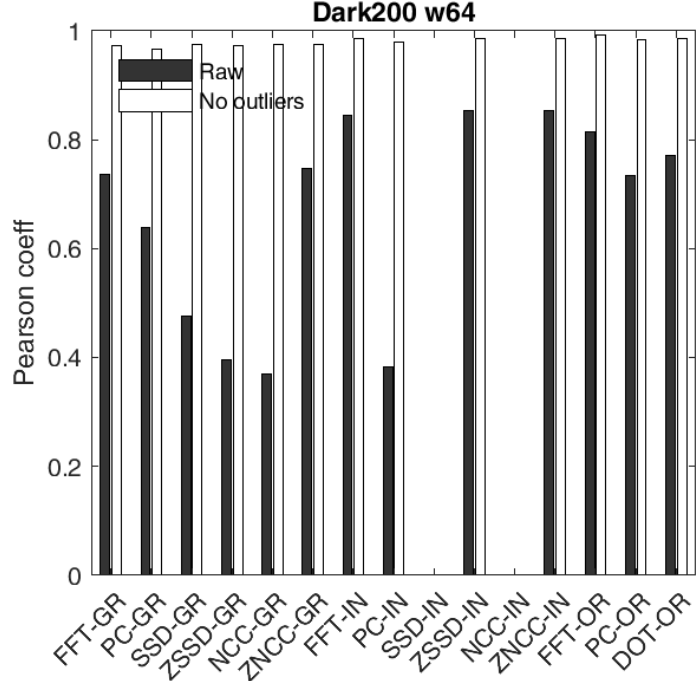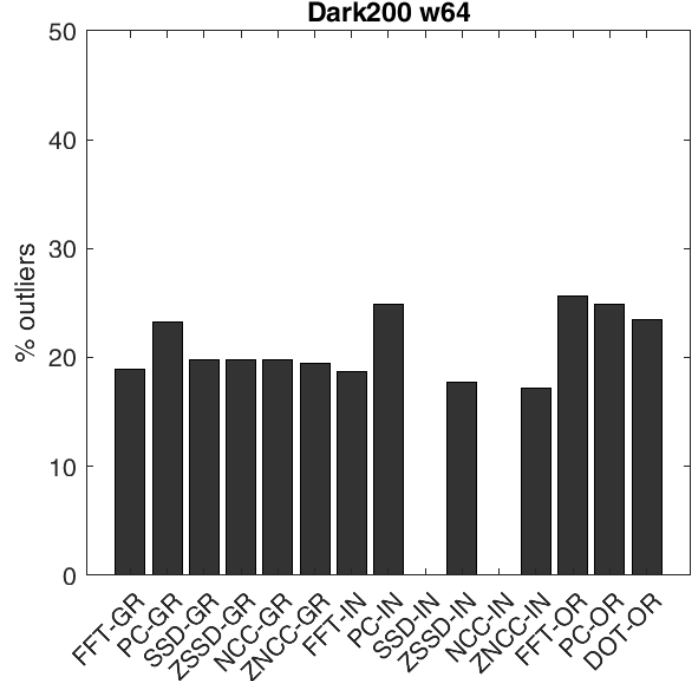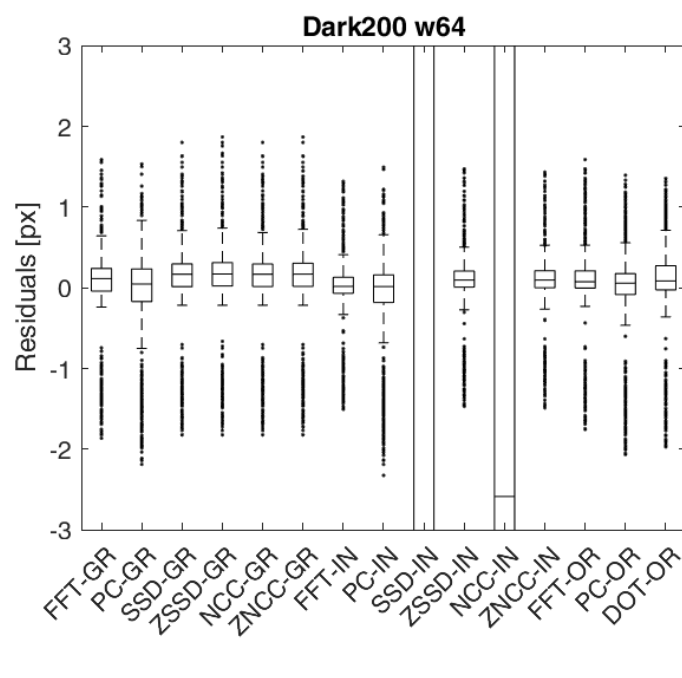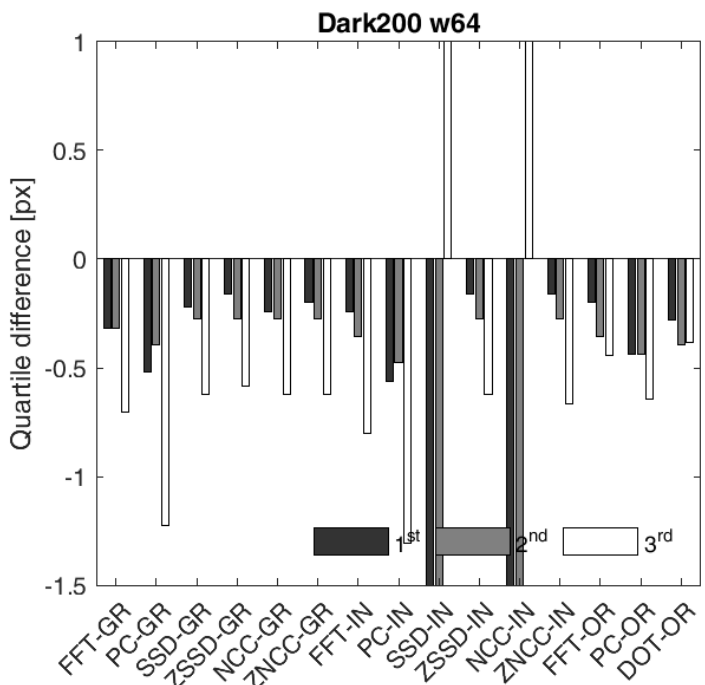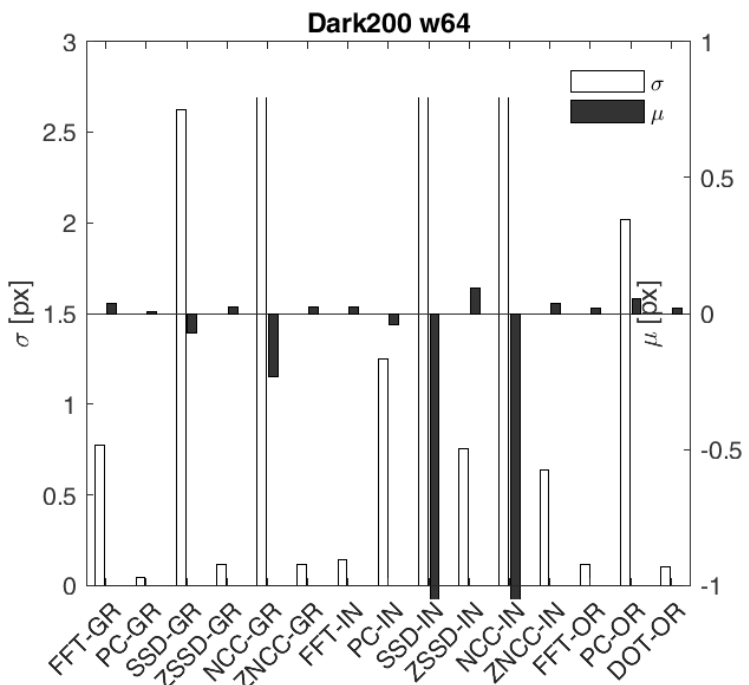

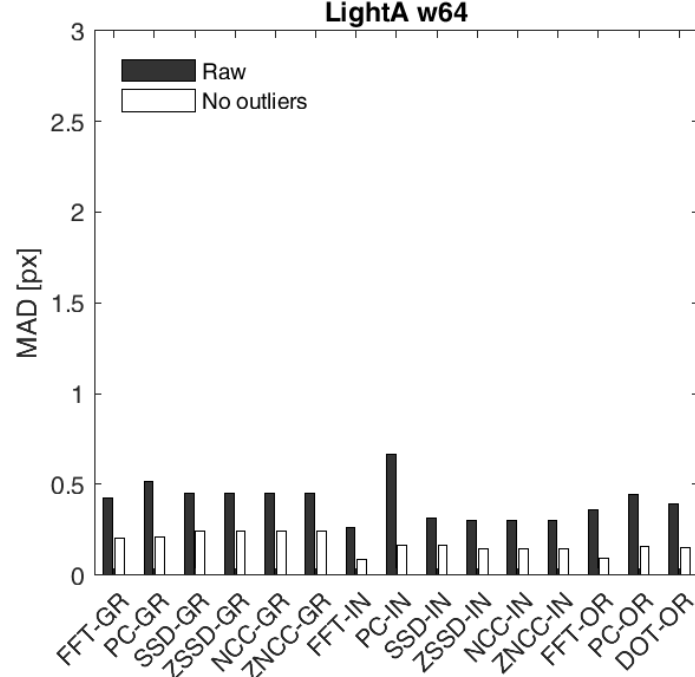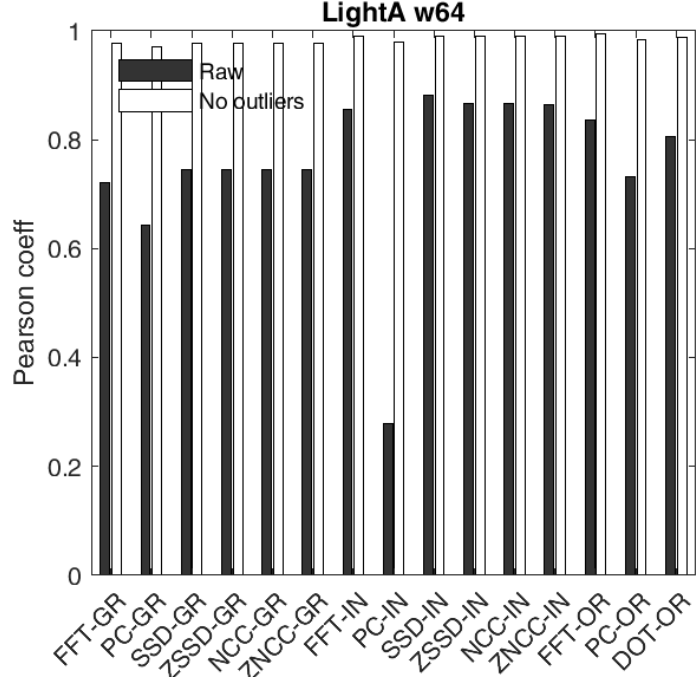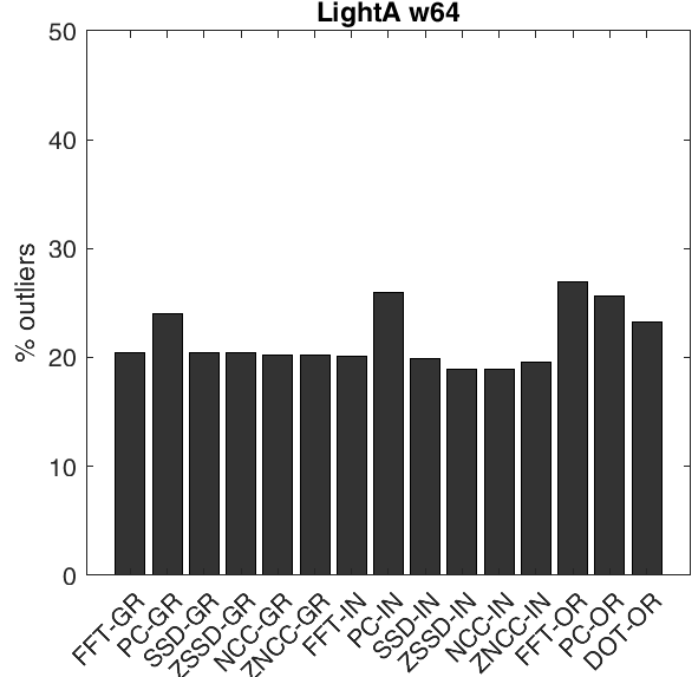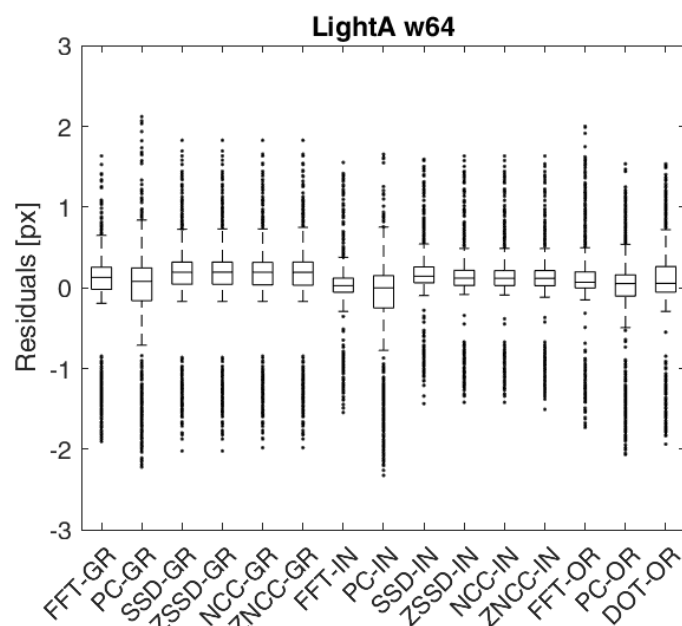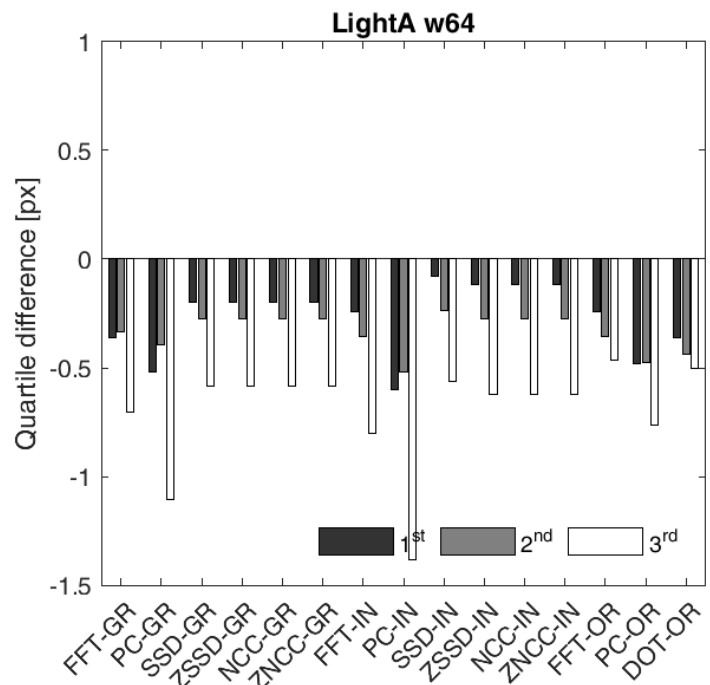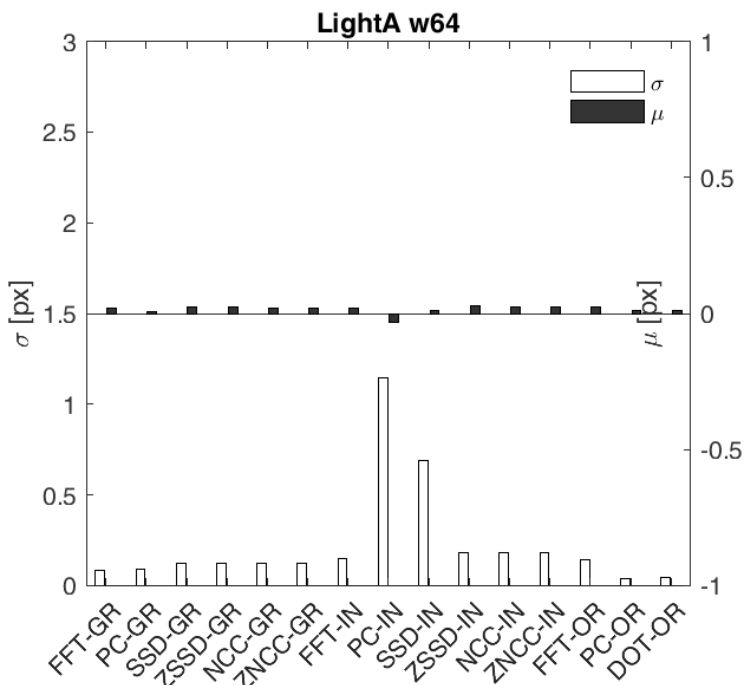

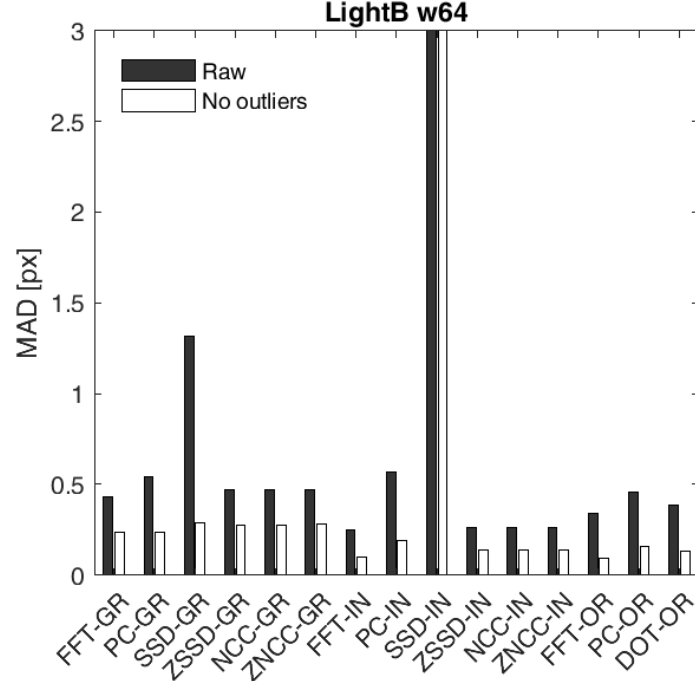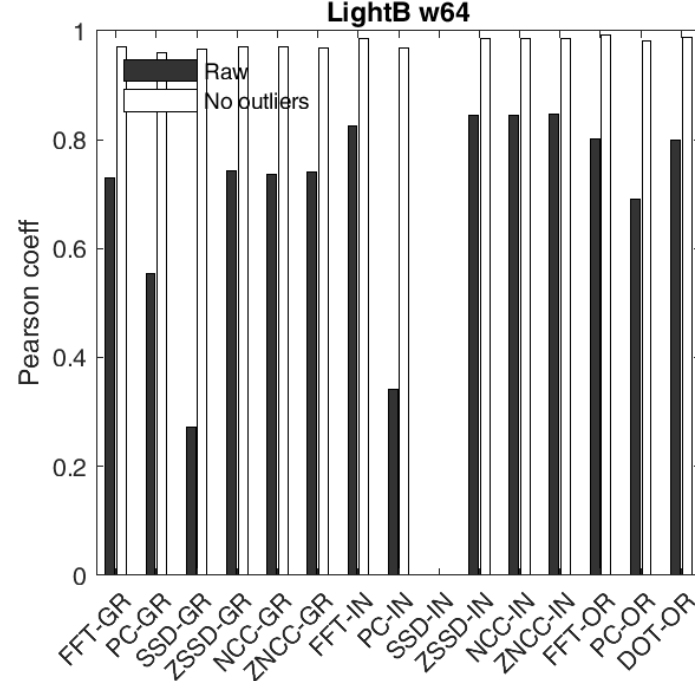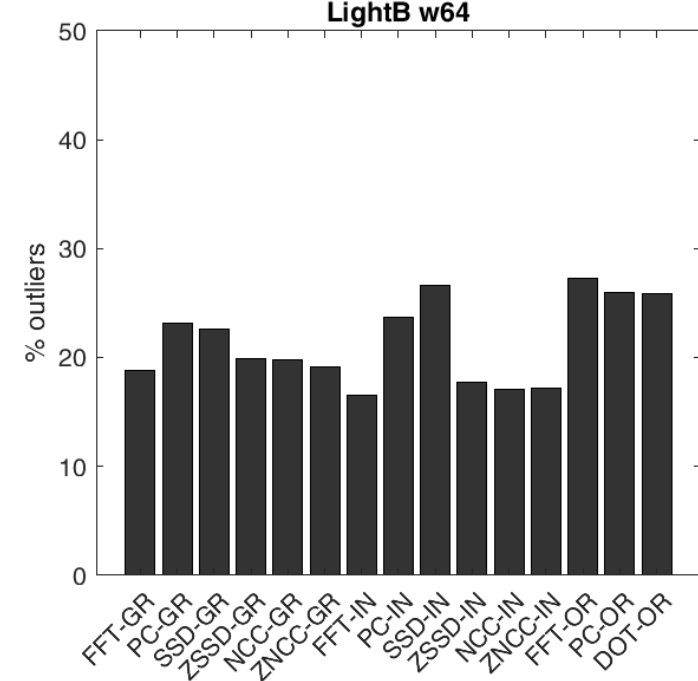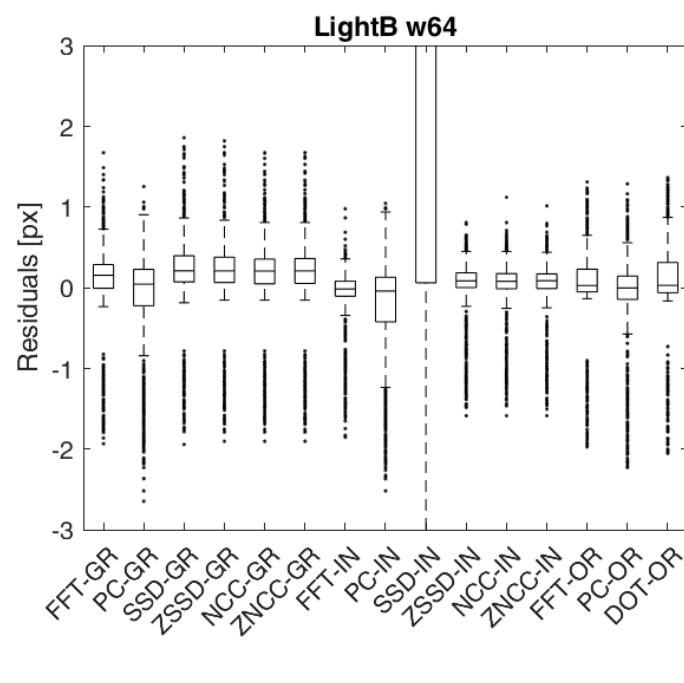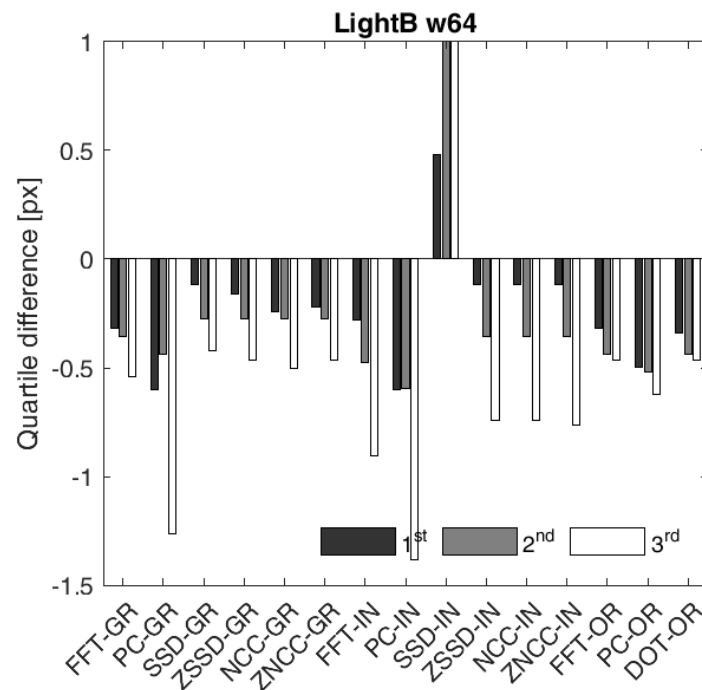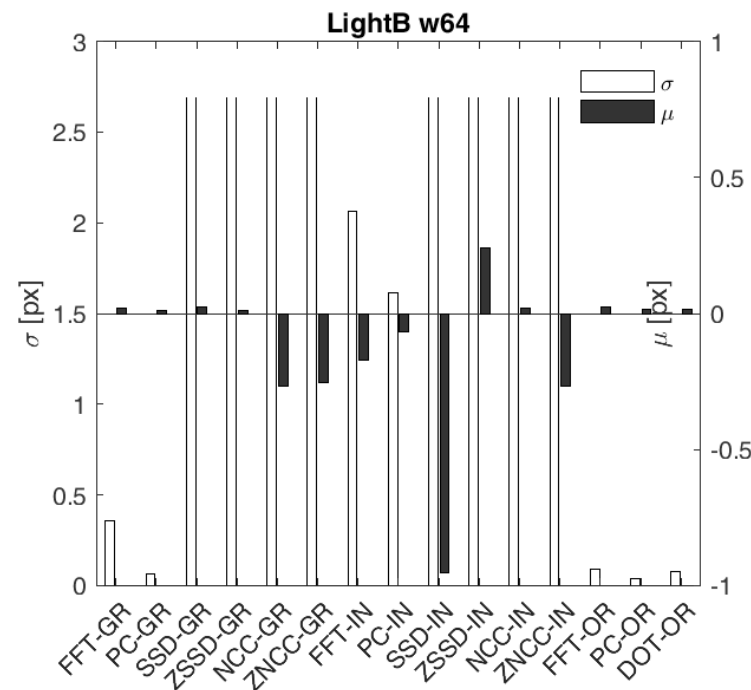

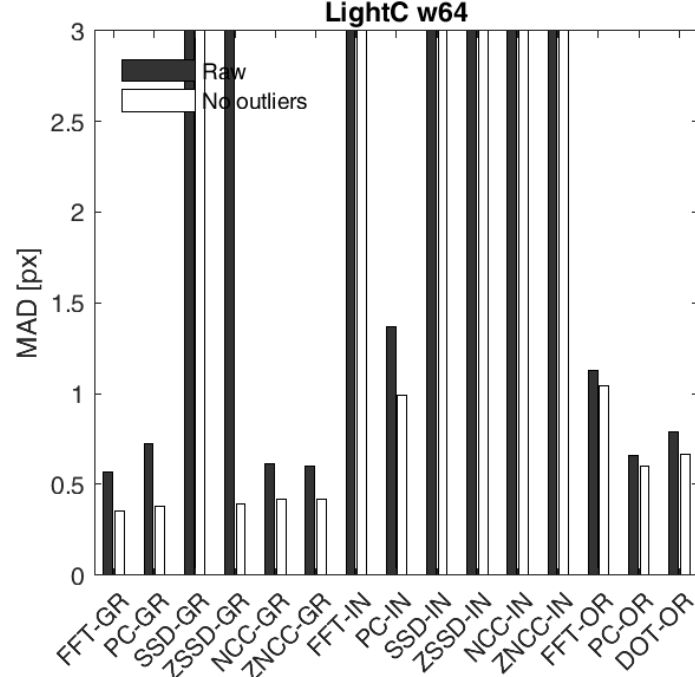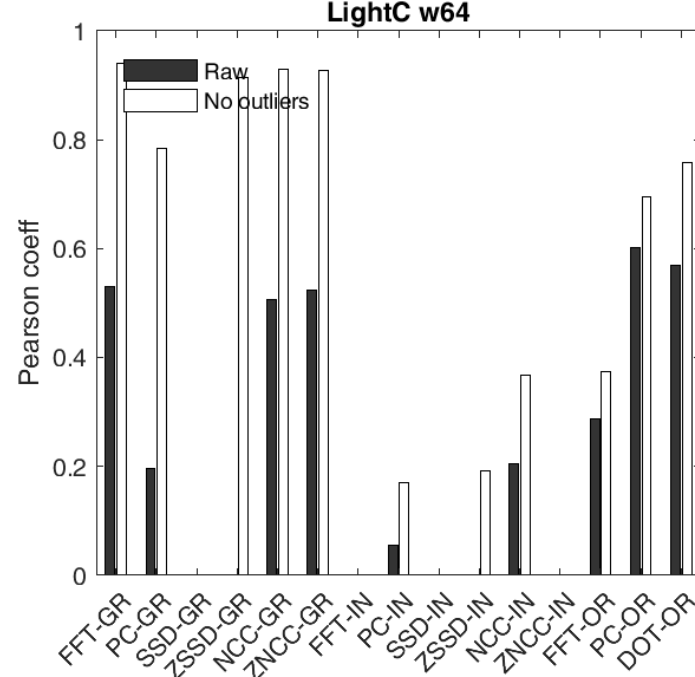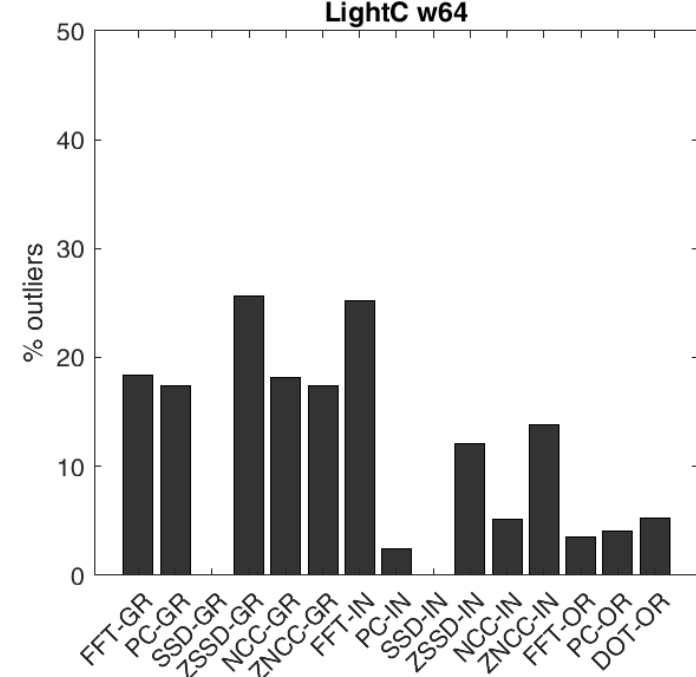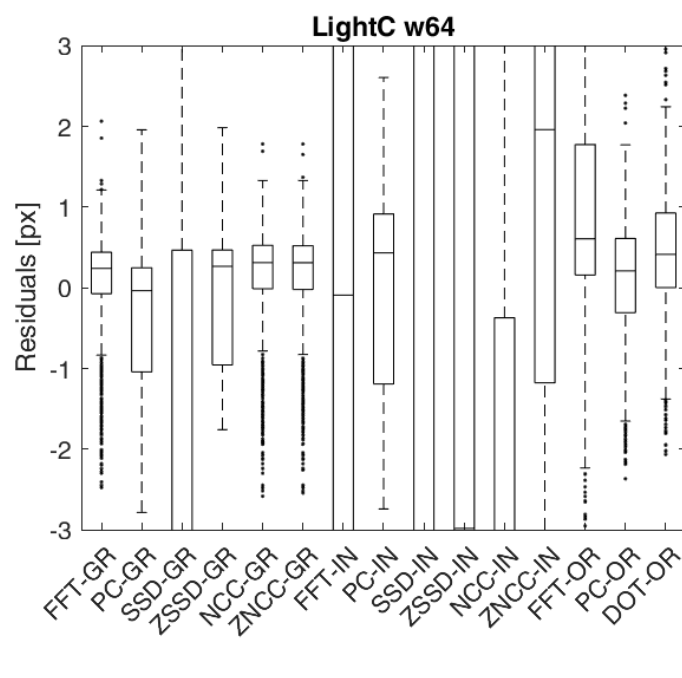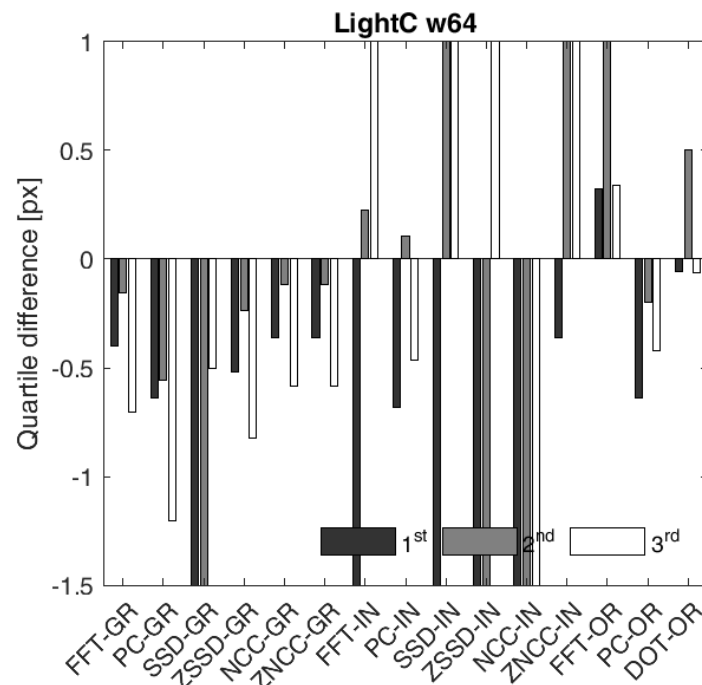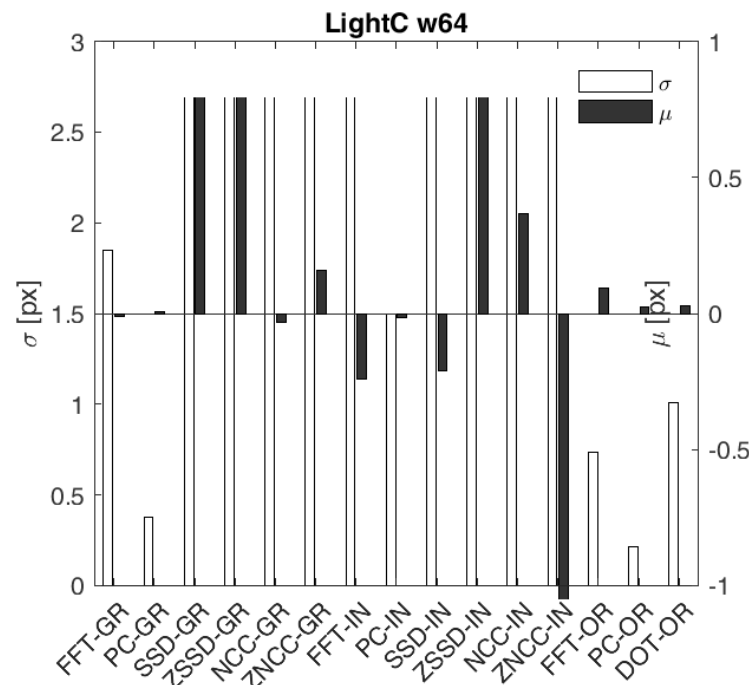

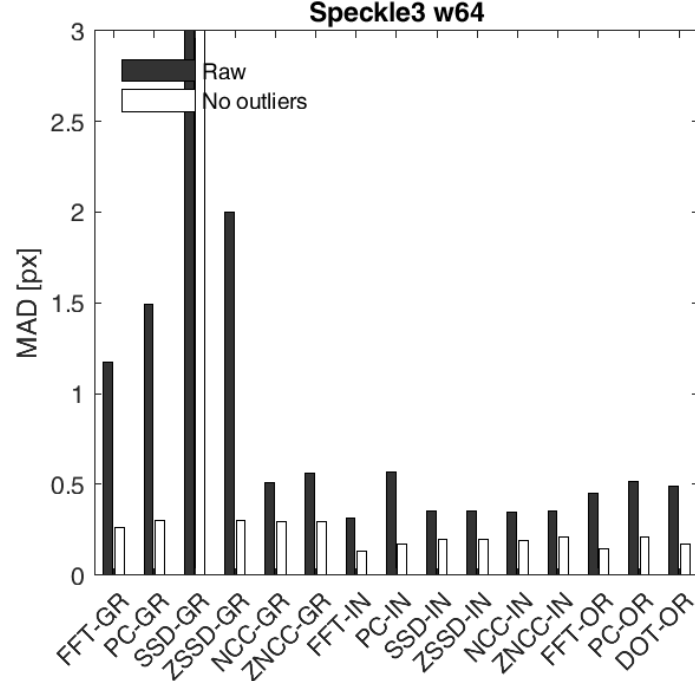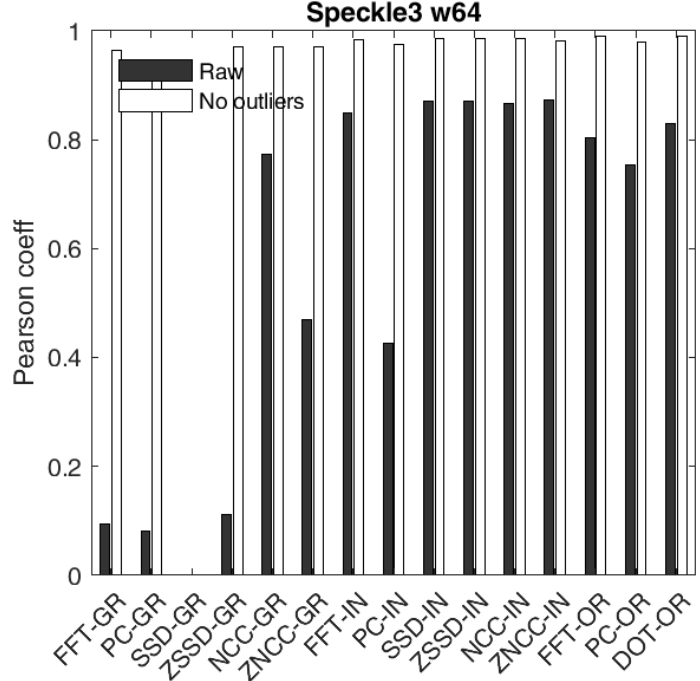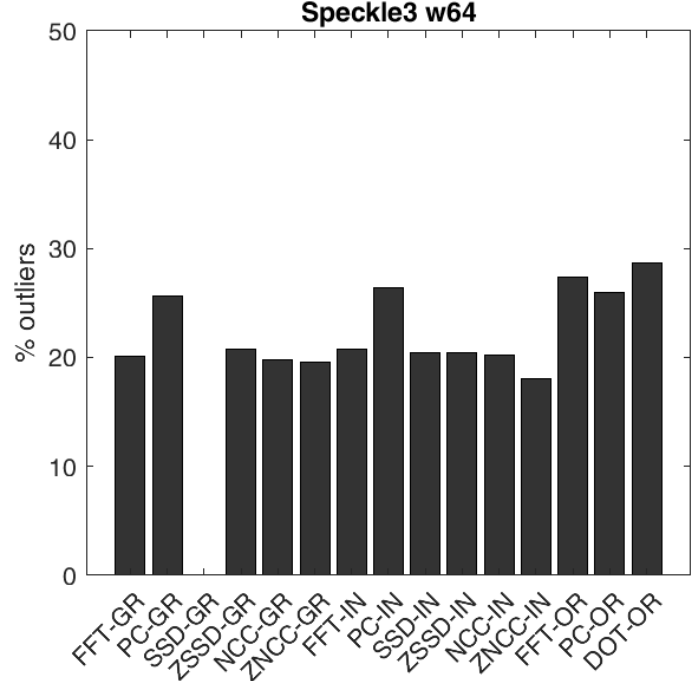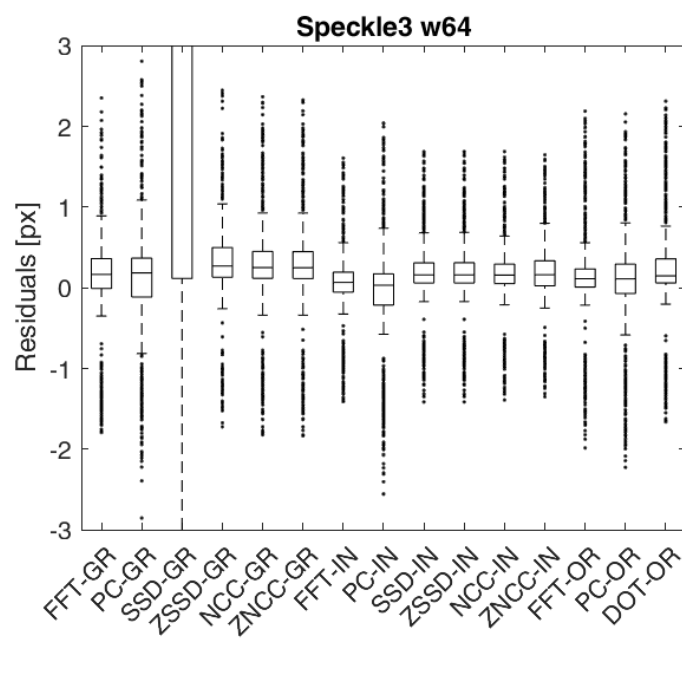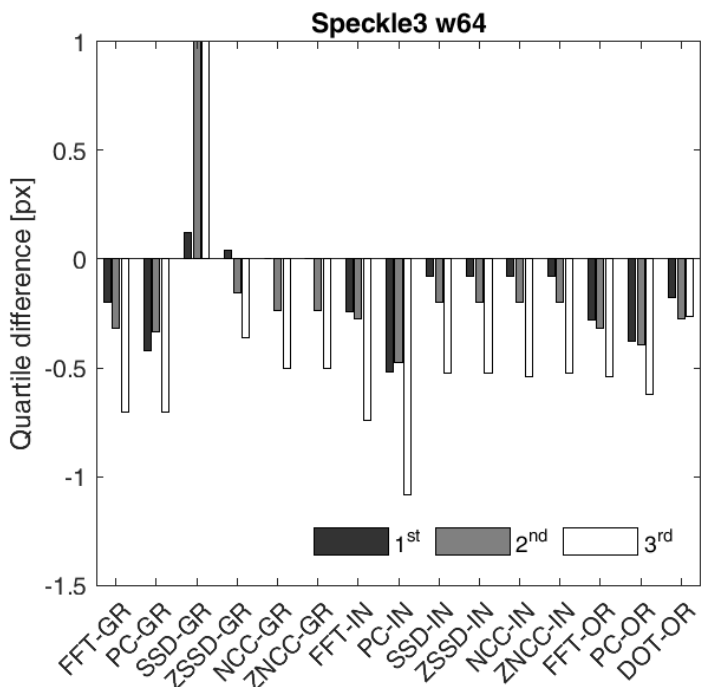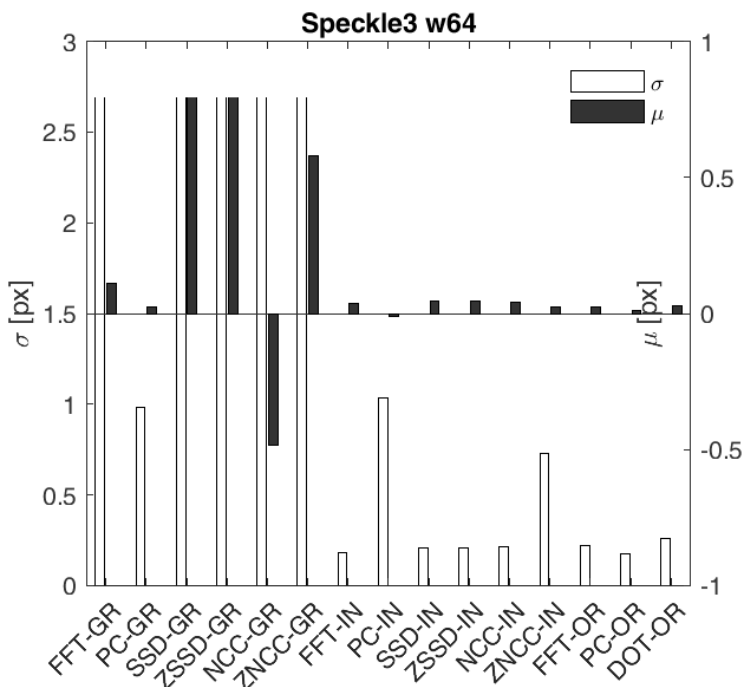

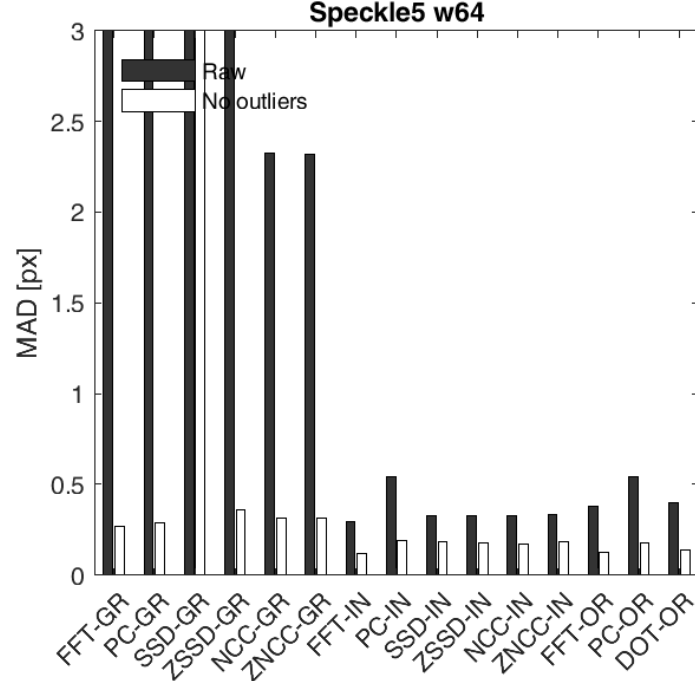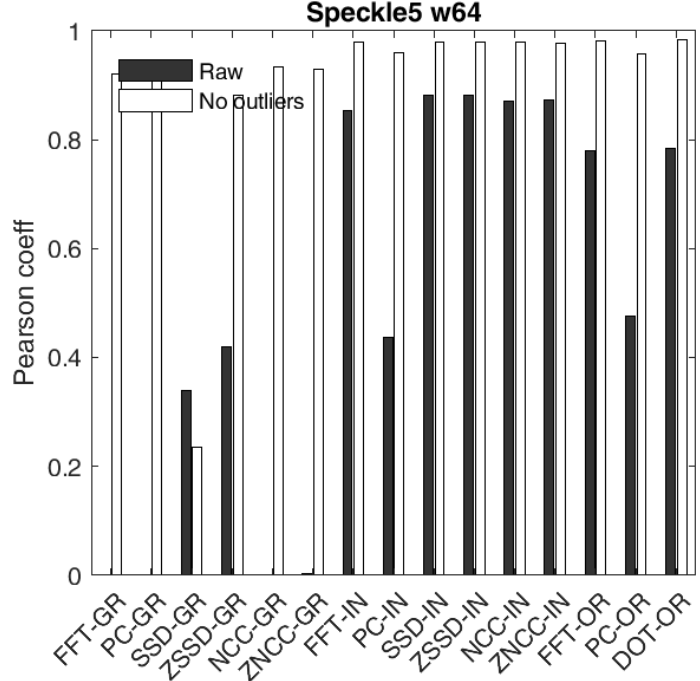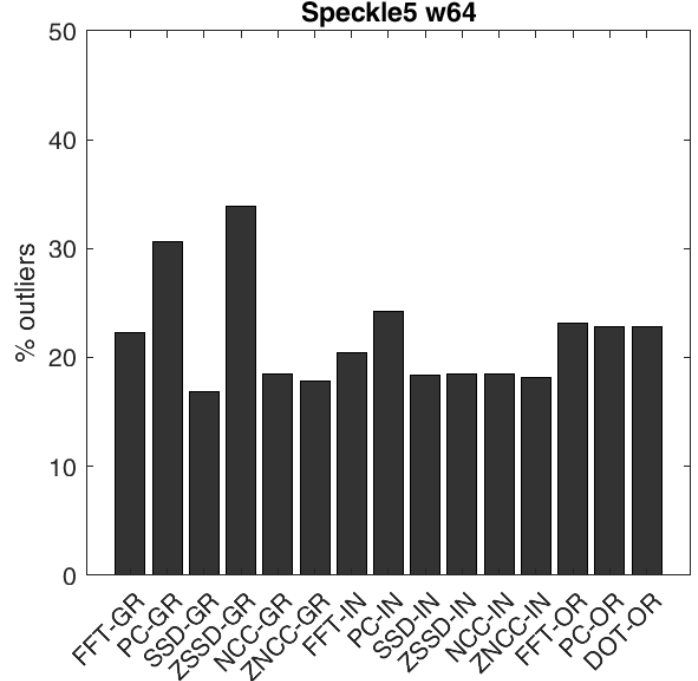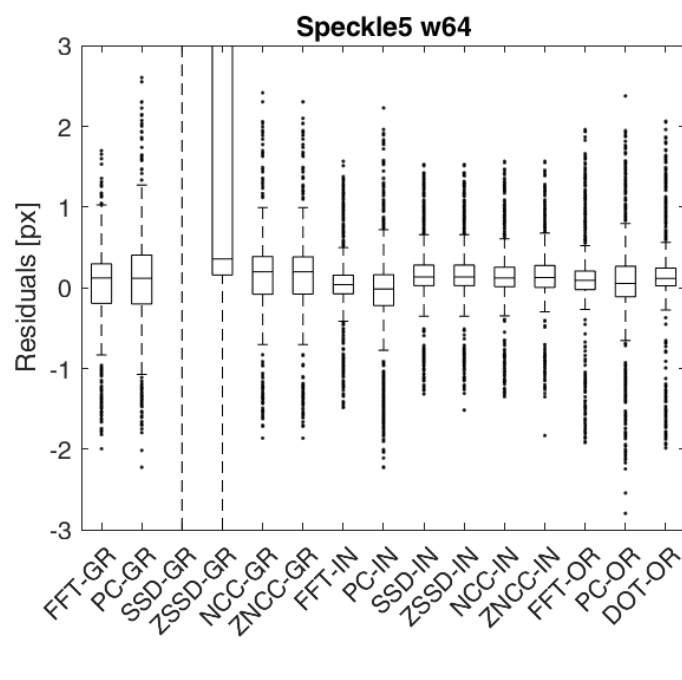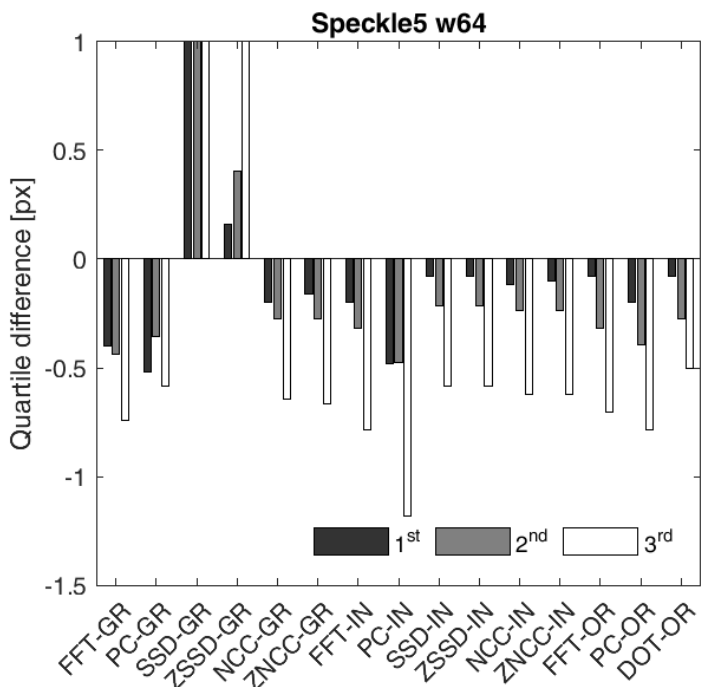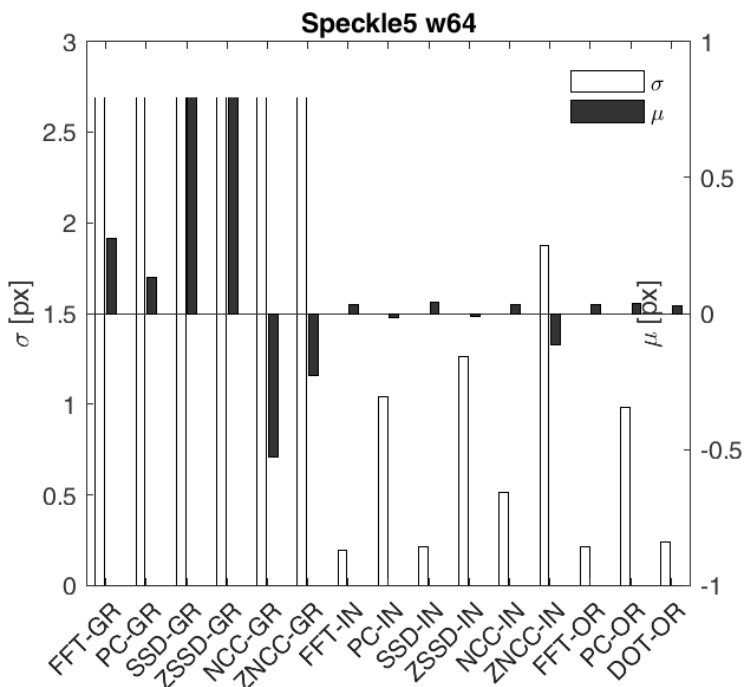

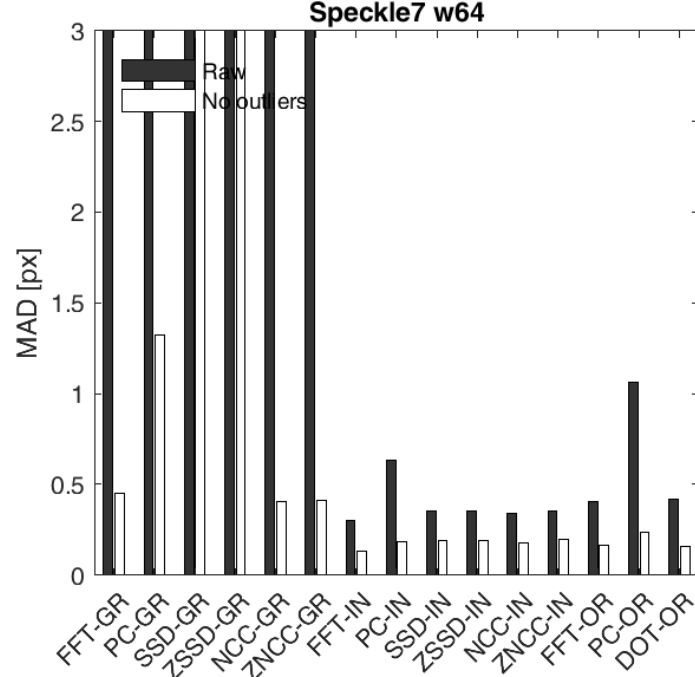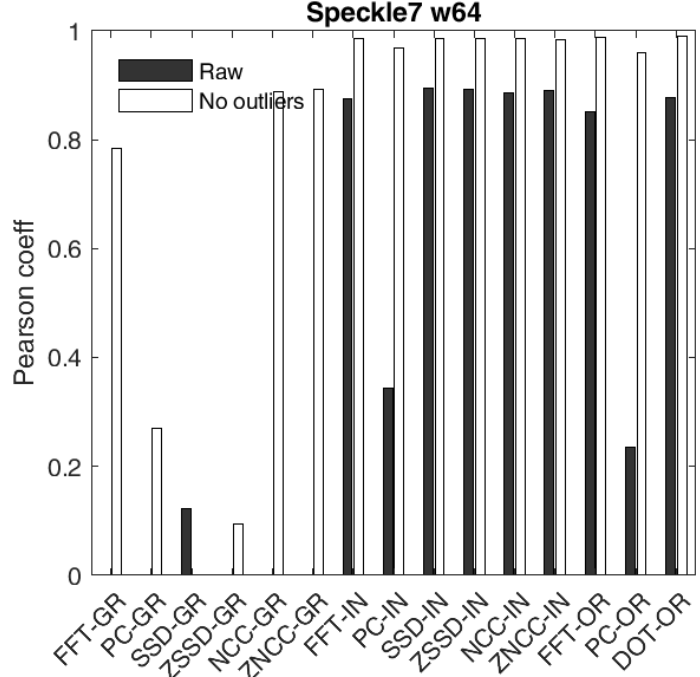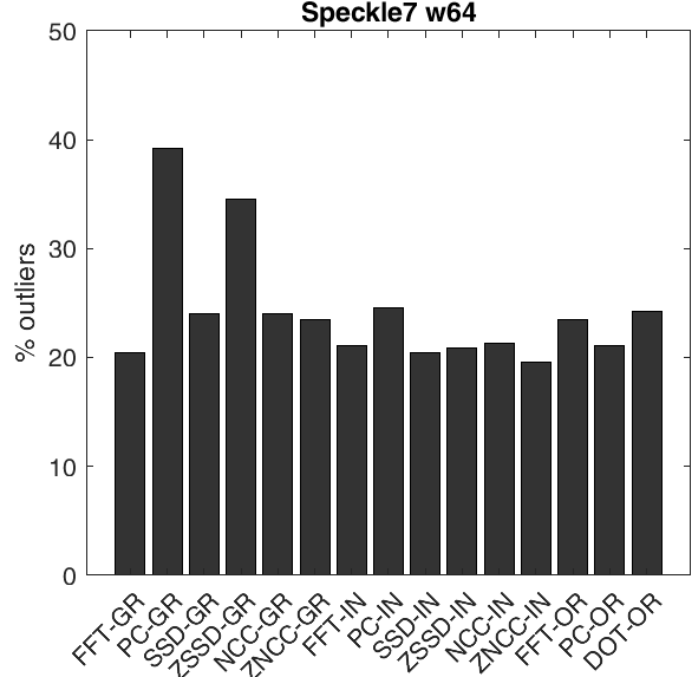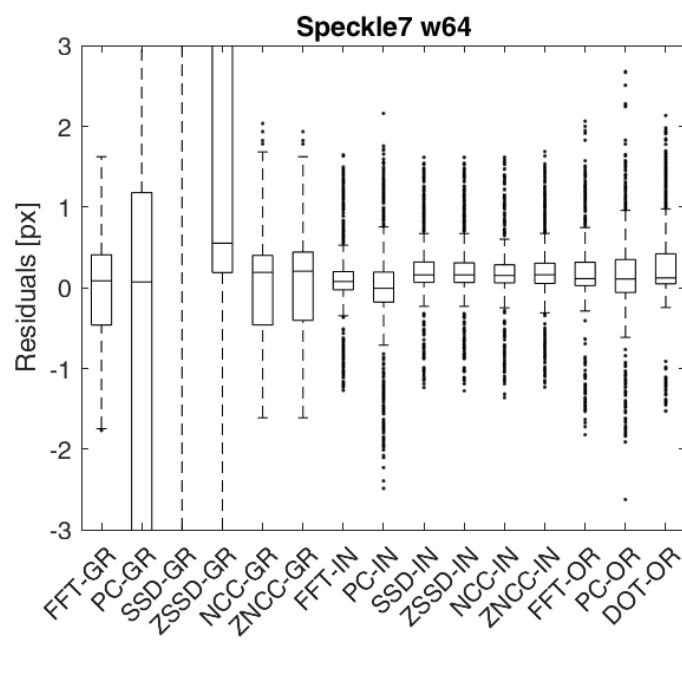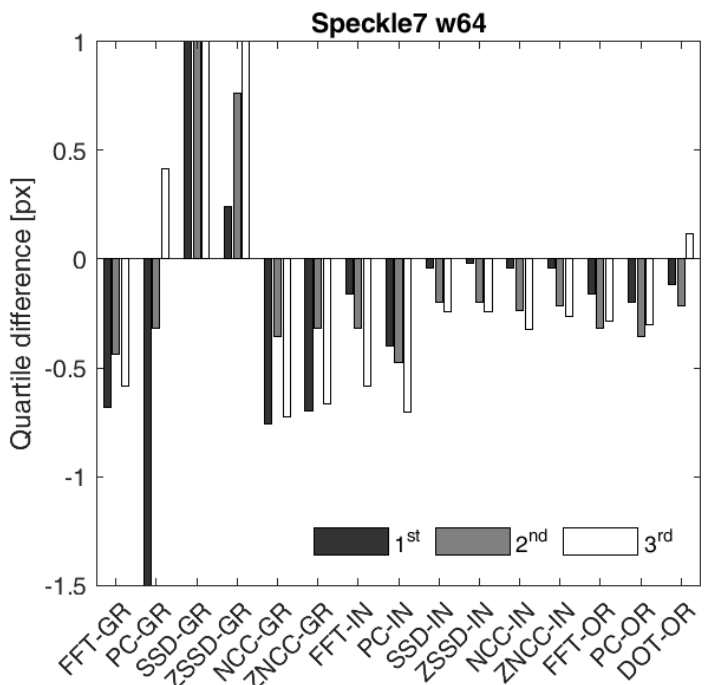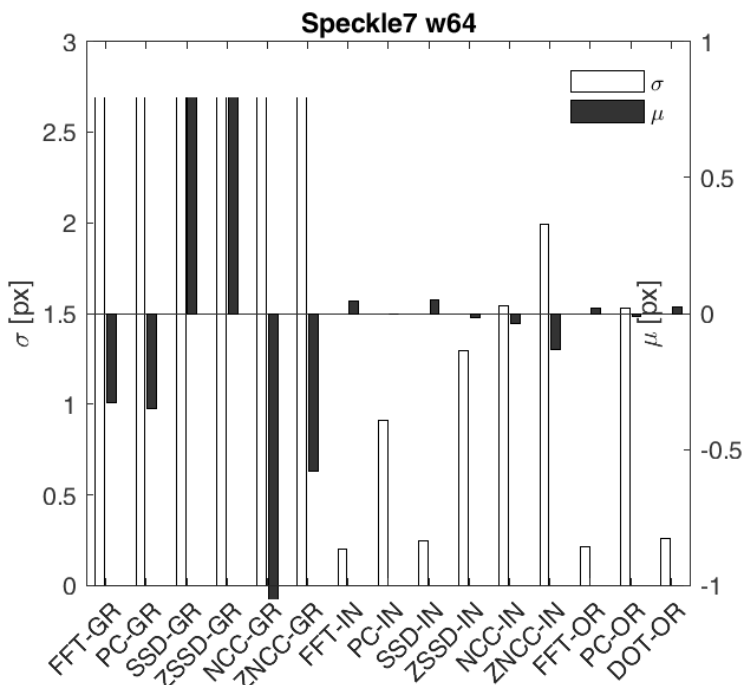

Supplement: s1 [file s1]

Reflm

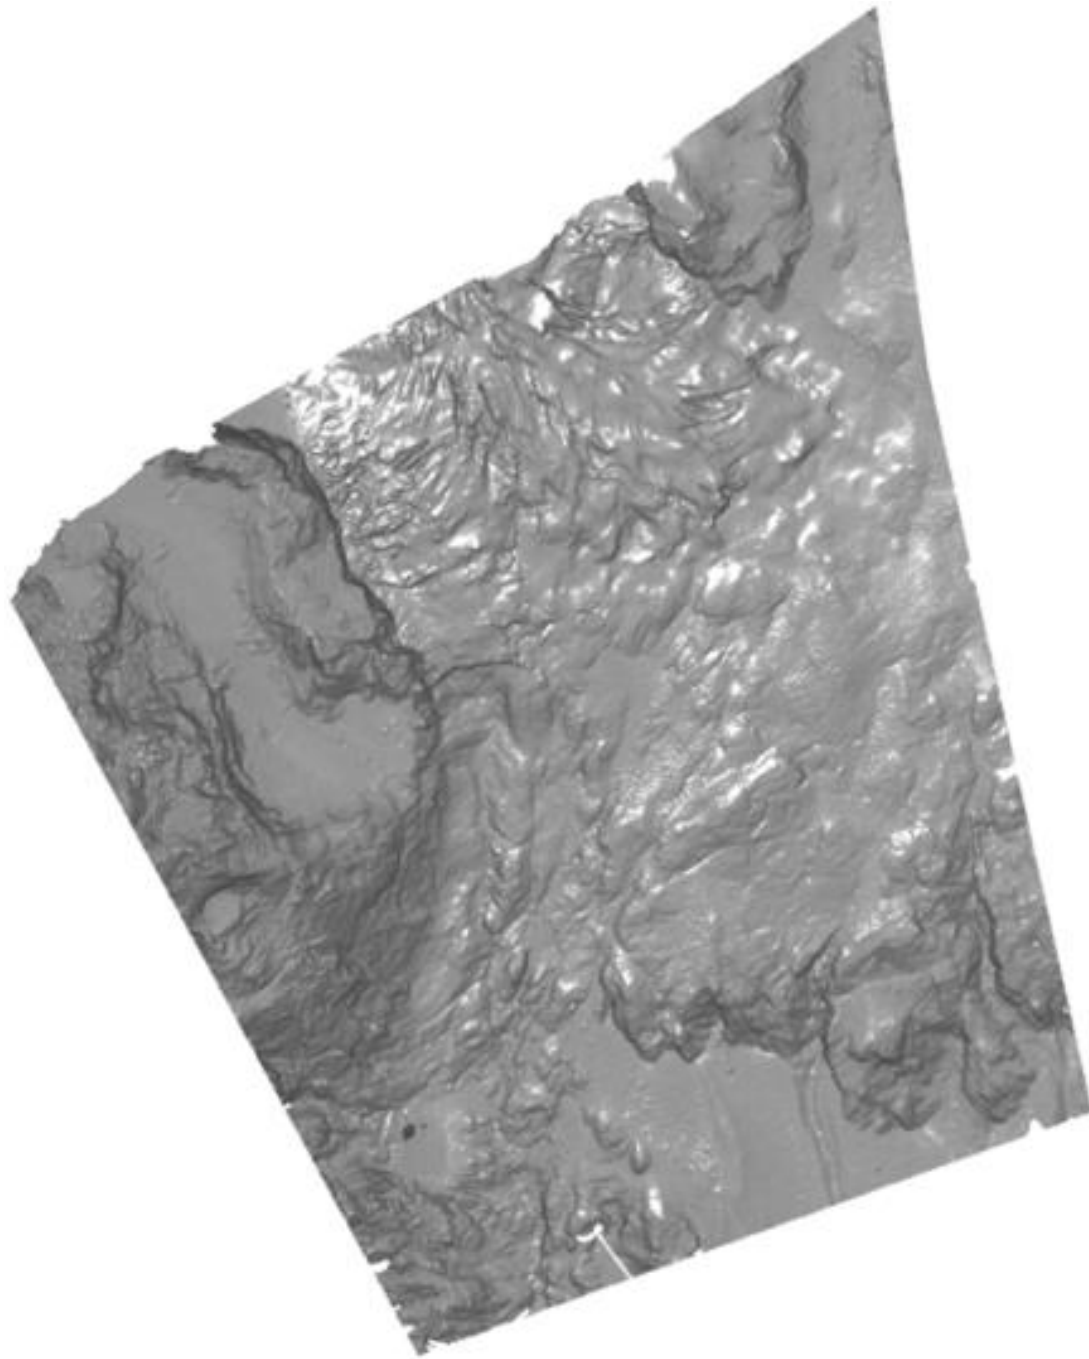

motlm

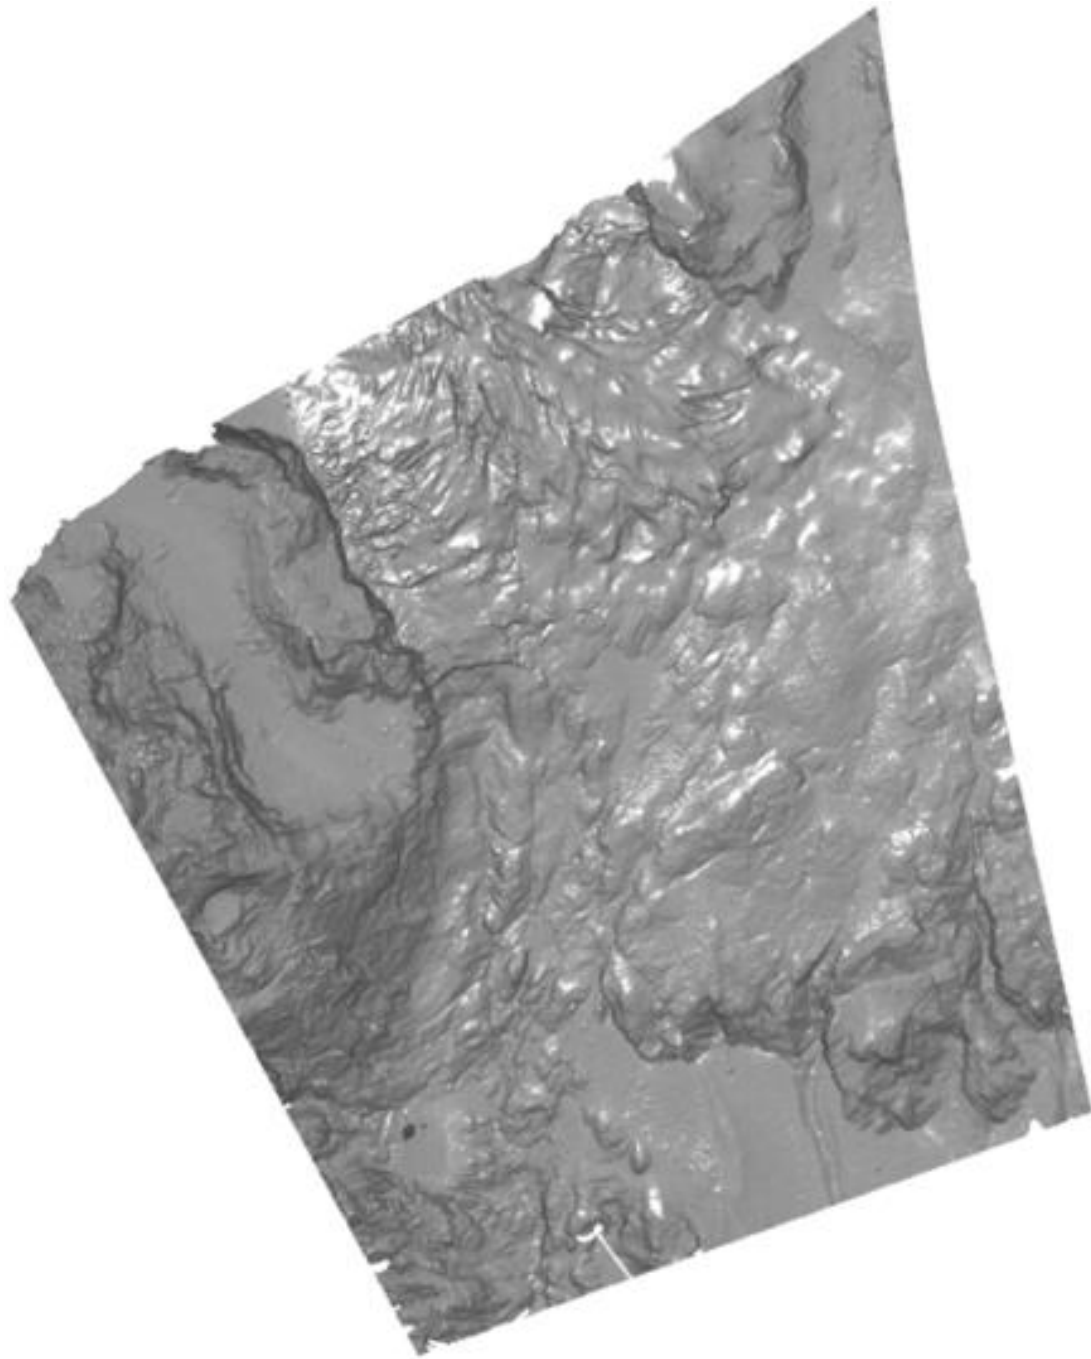

Blur3

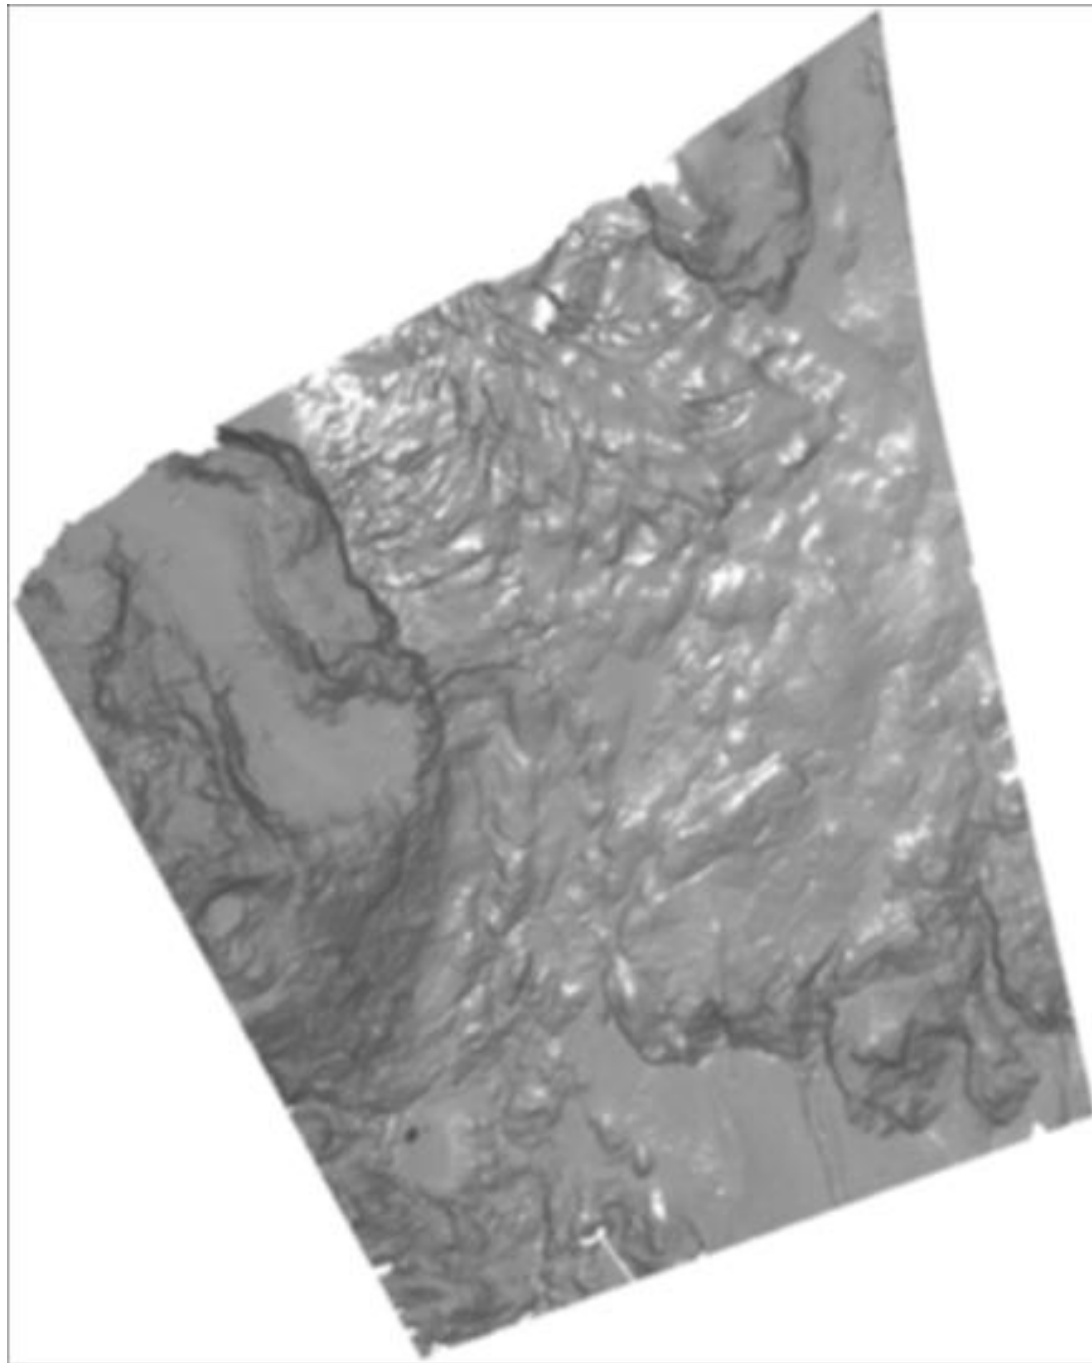

Blur5

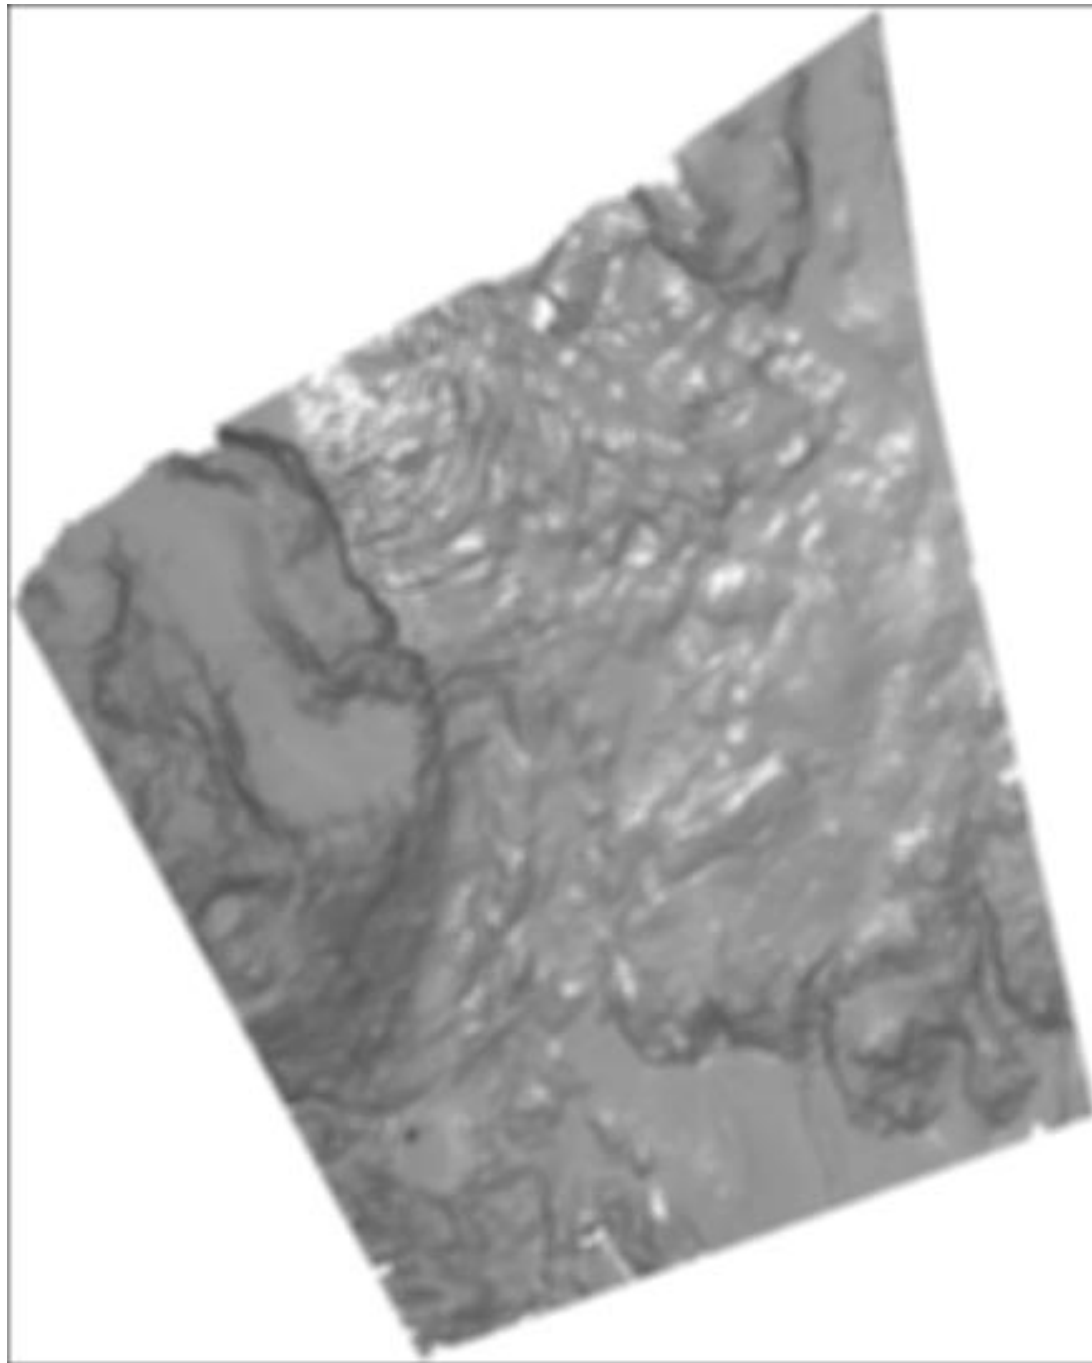

Blur7

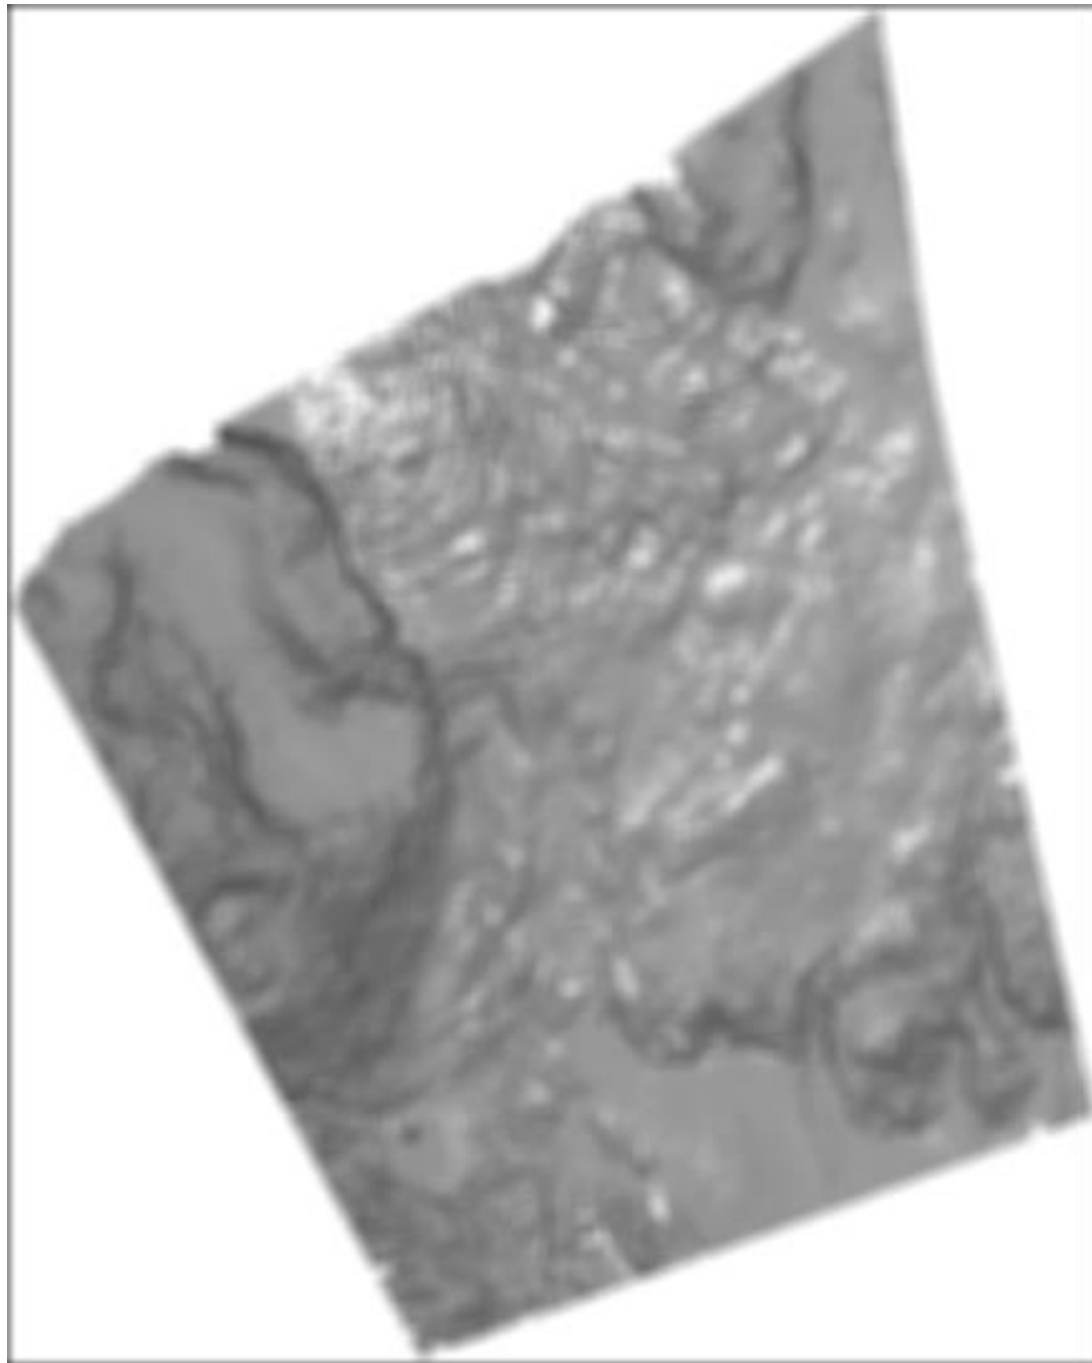

Dark100

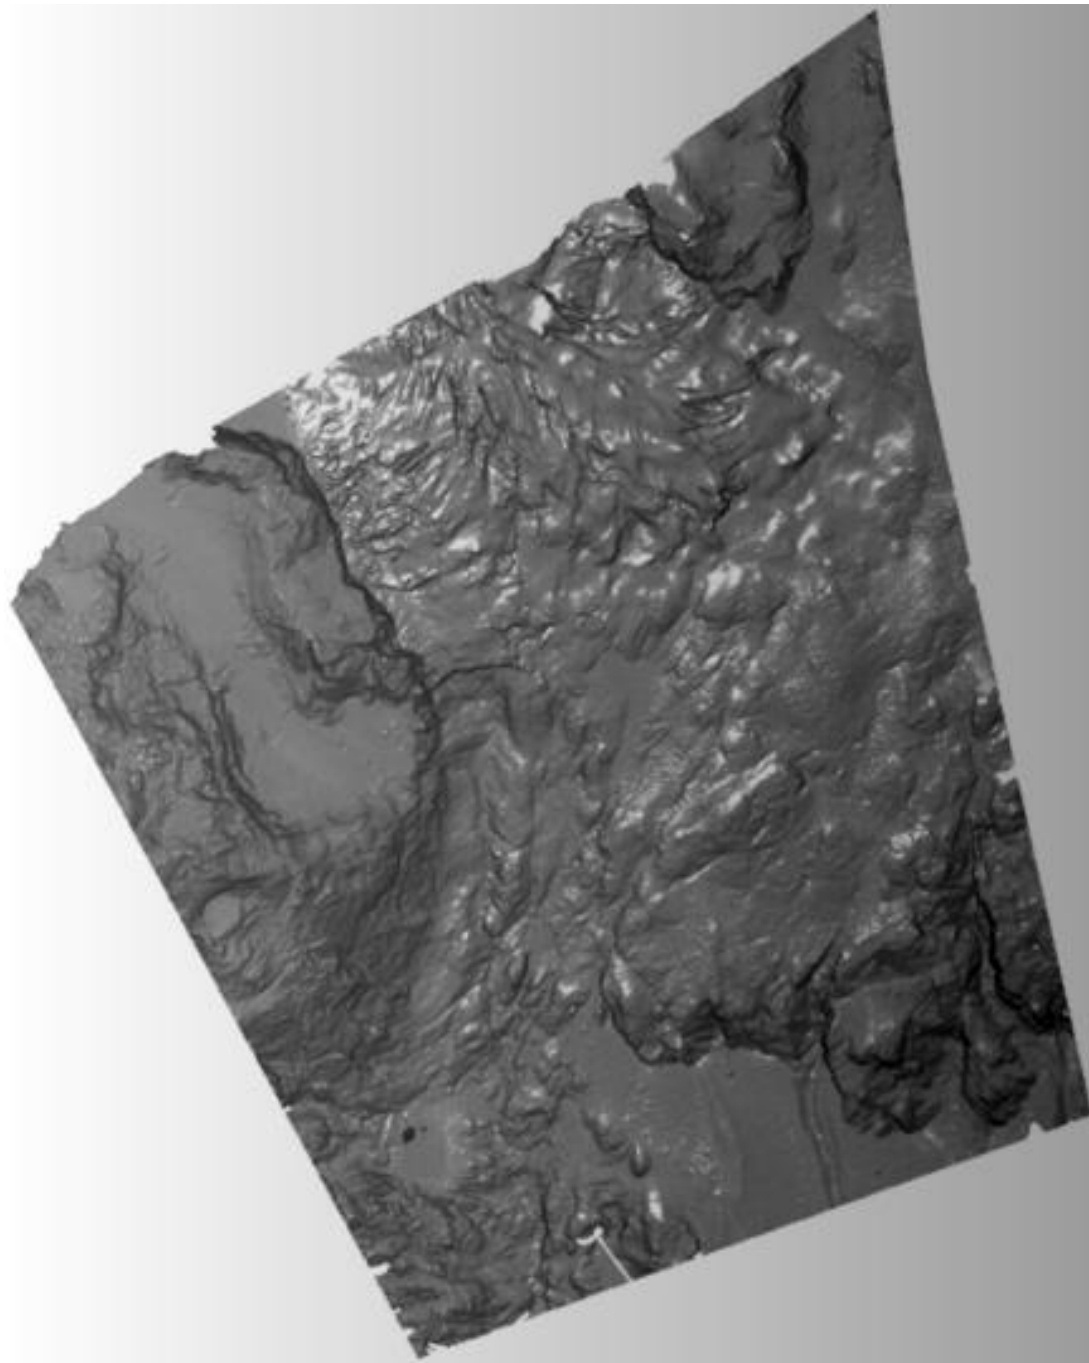

Dark150

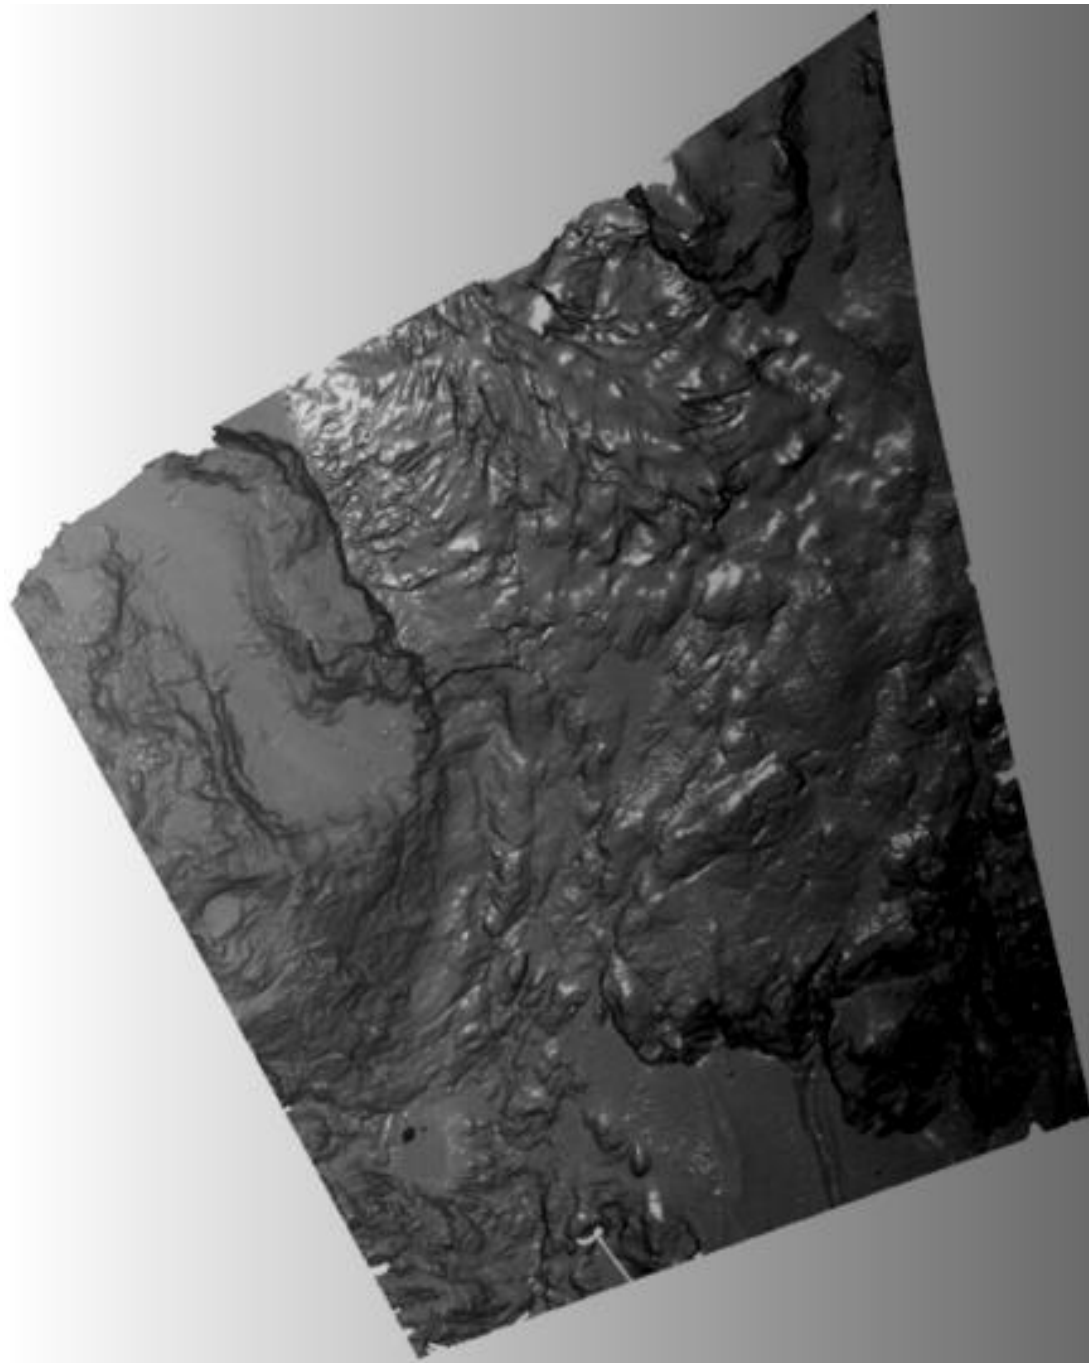

Dark200

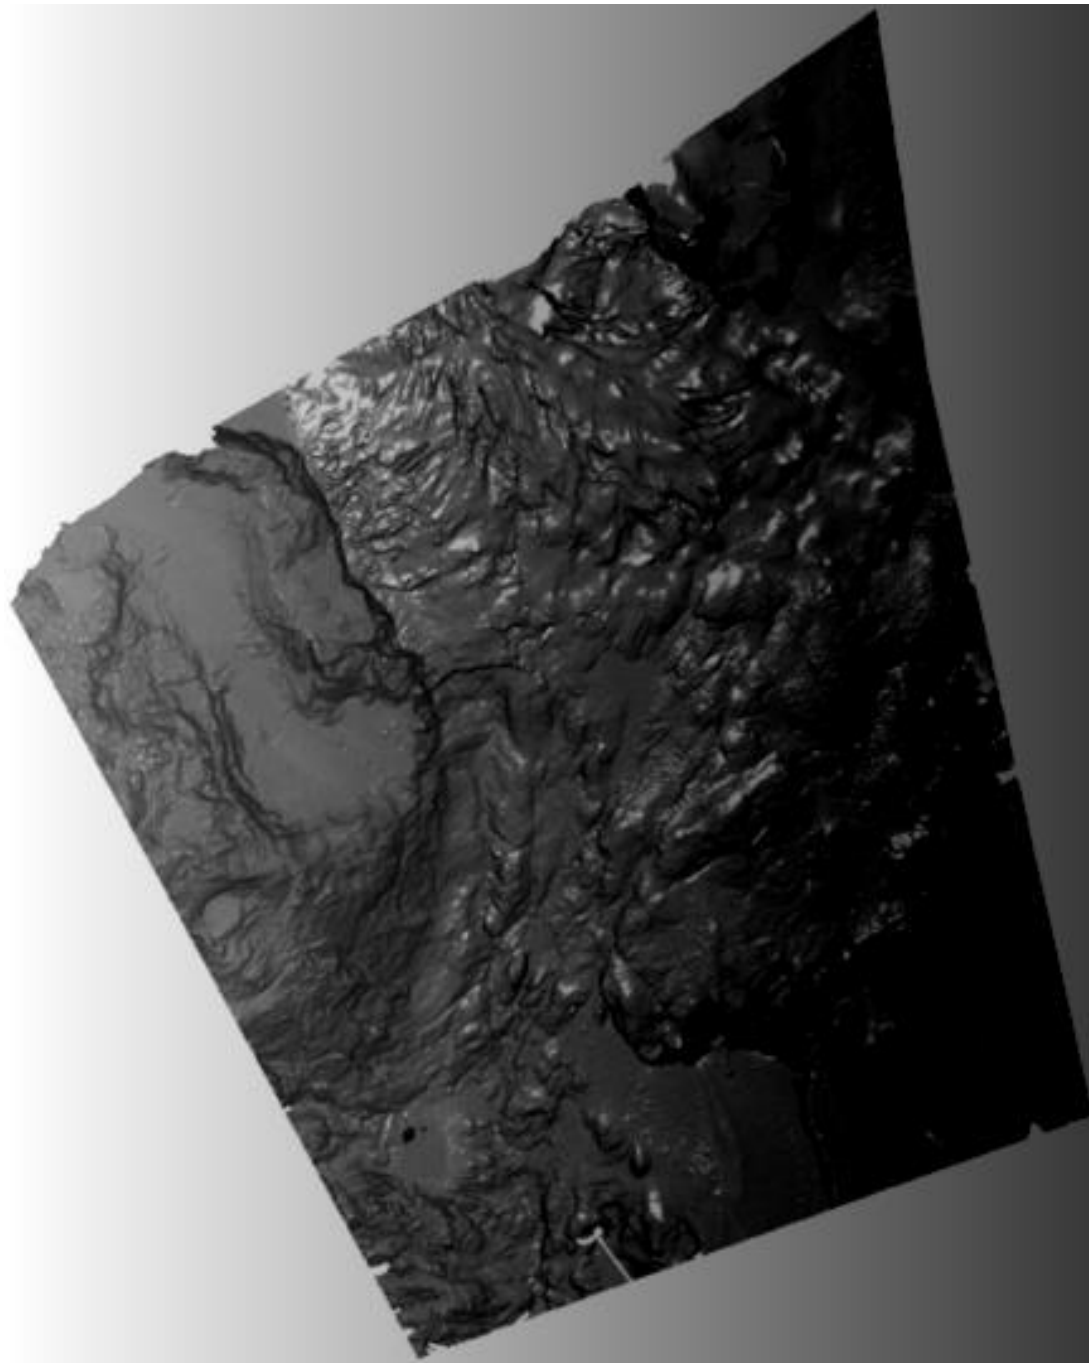

LightA

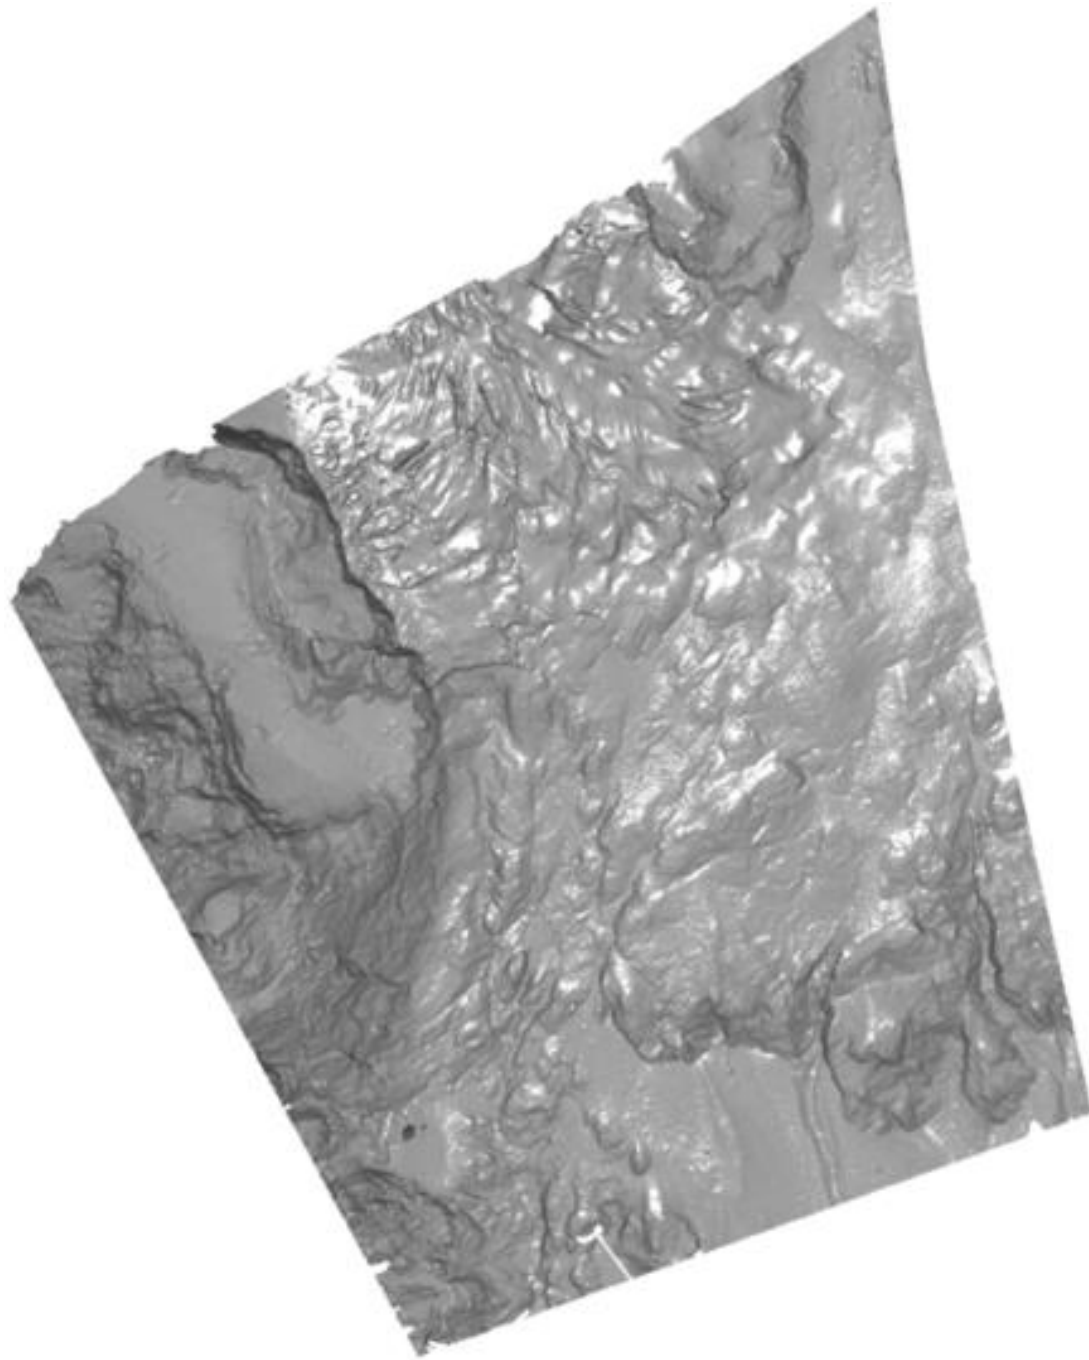

LightB

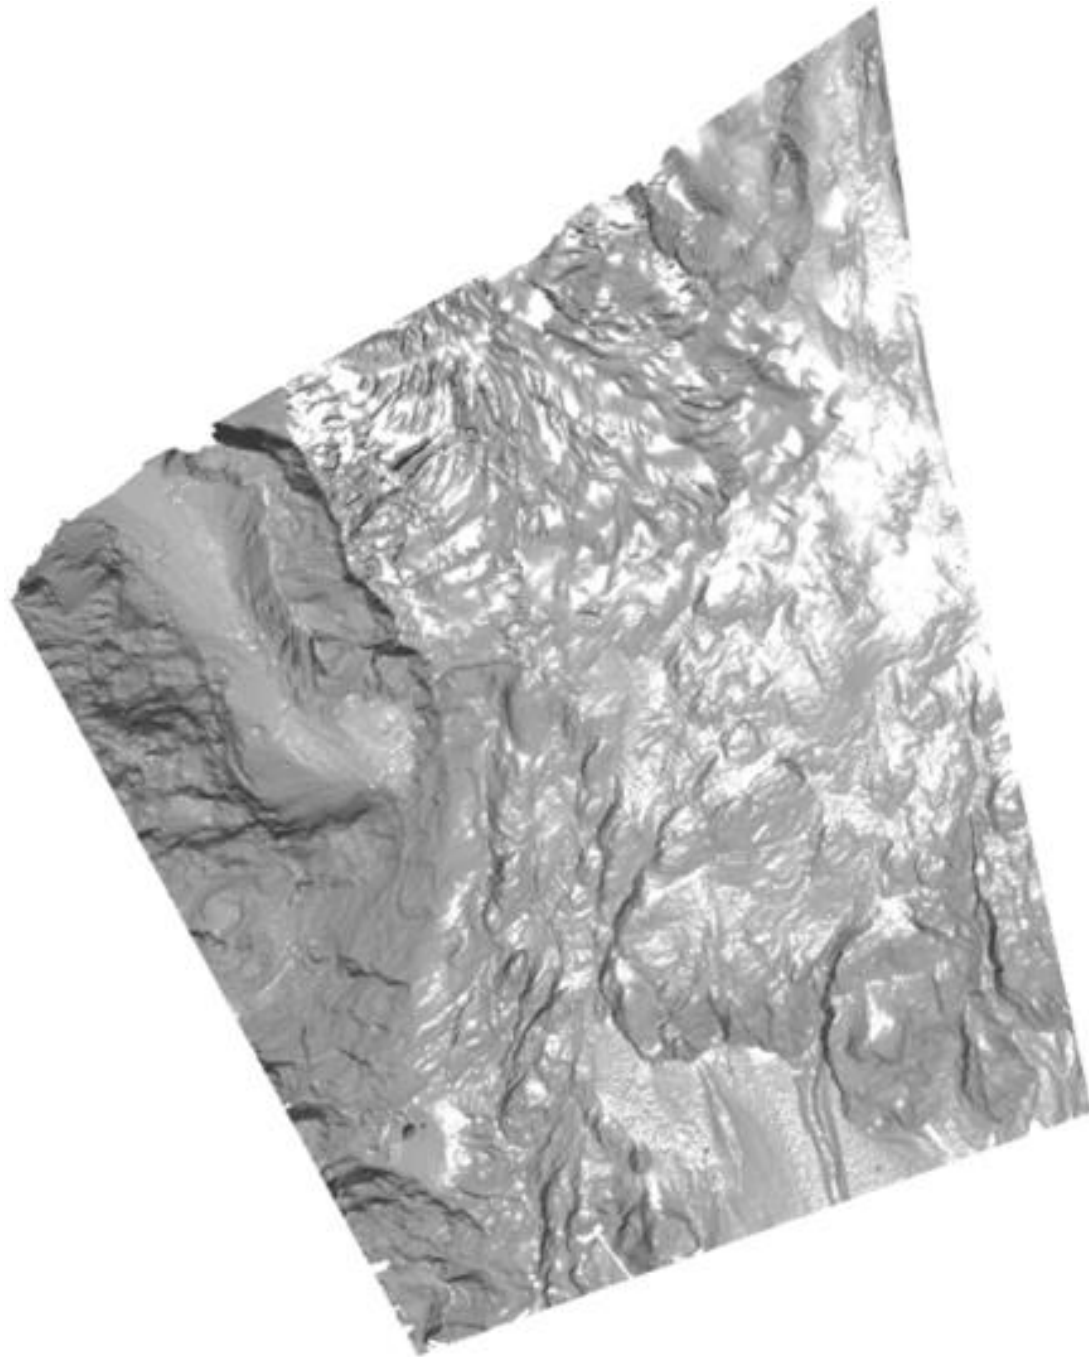

# LightC

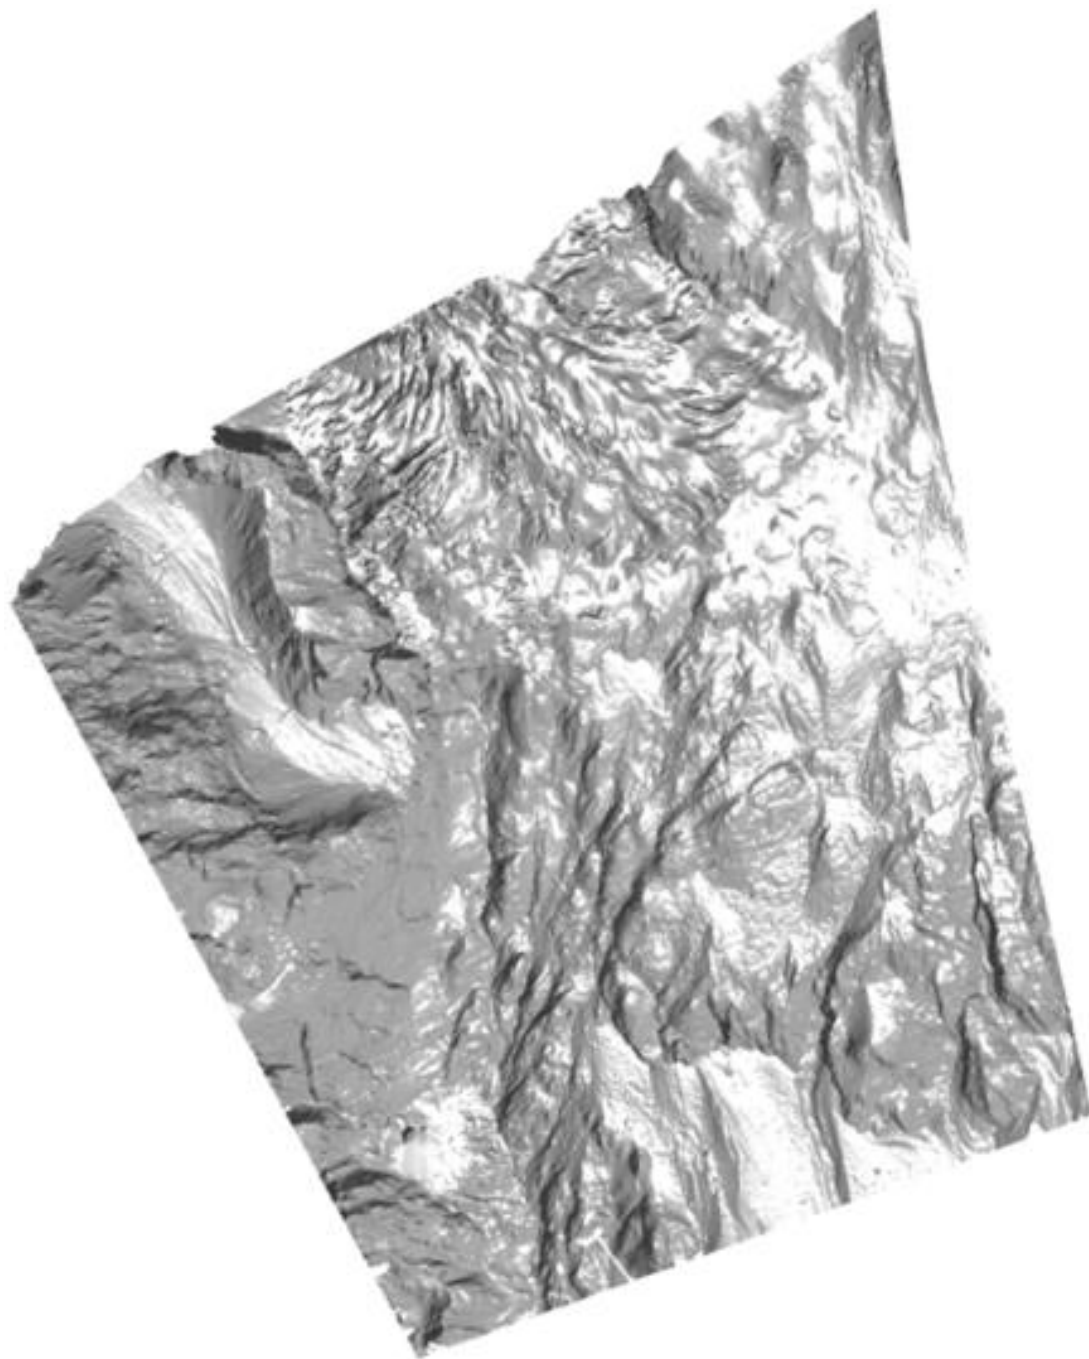

Speckle3

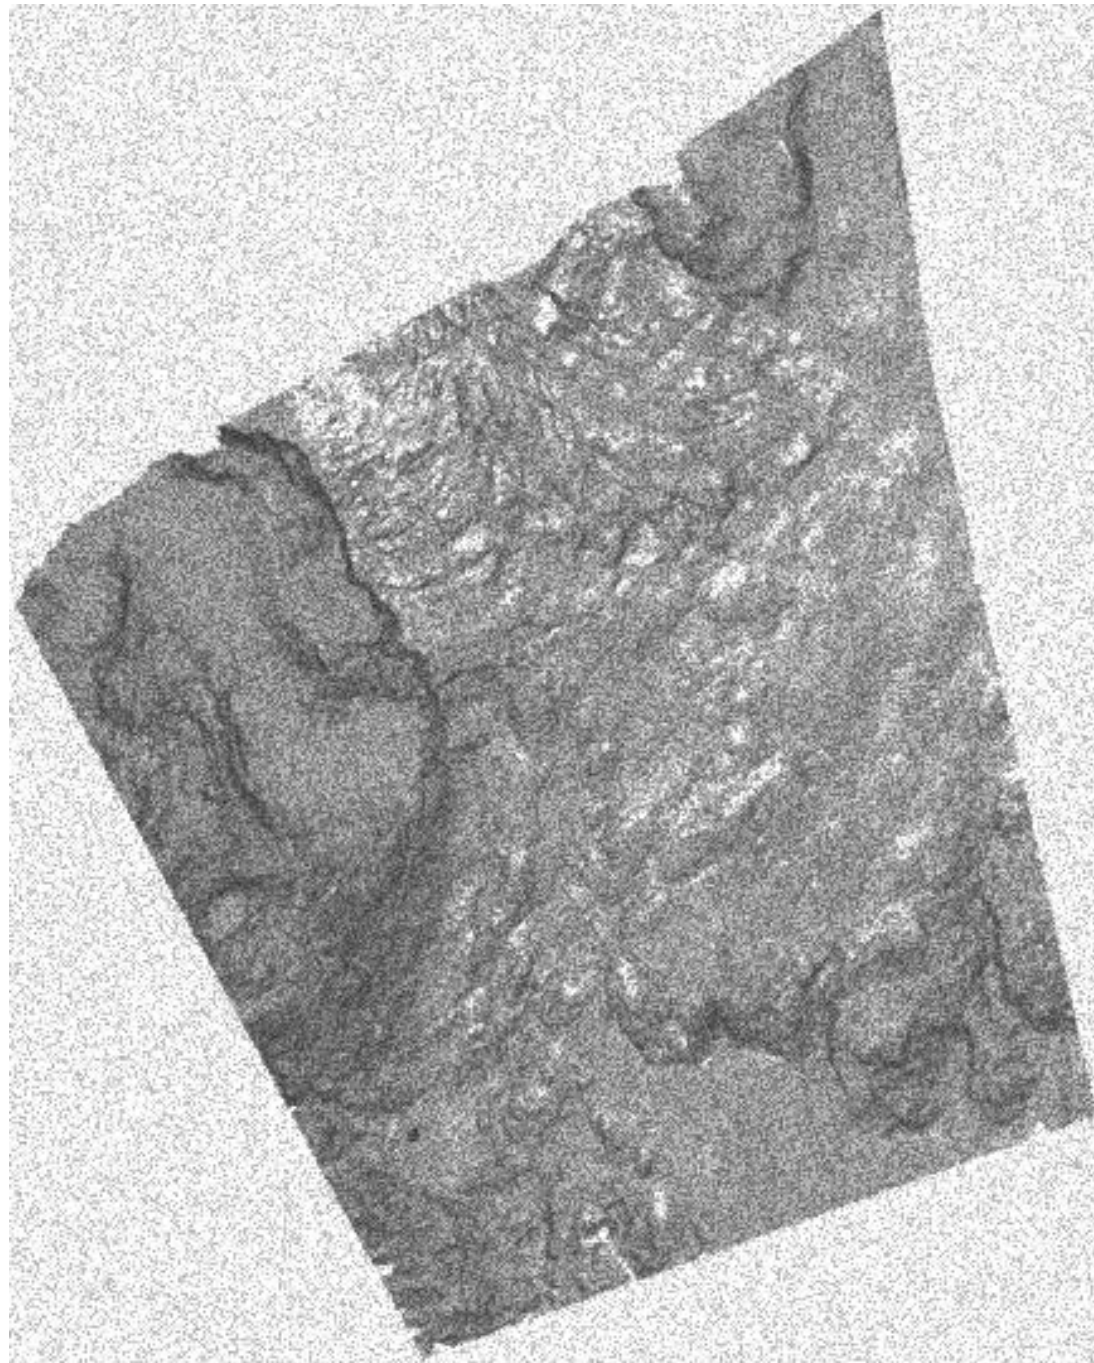

Speckle5

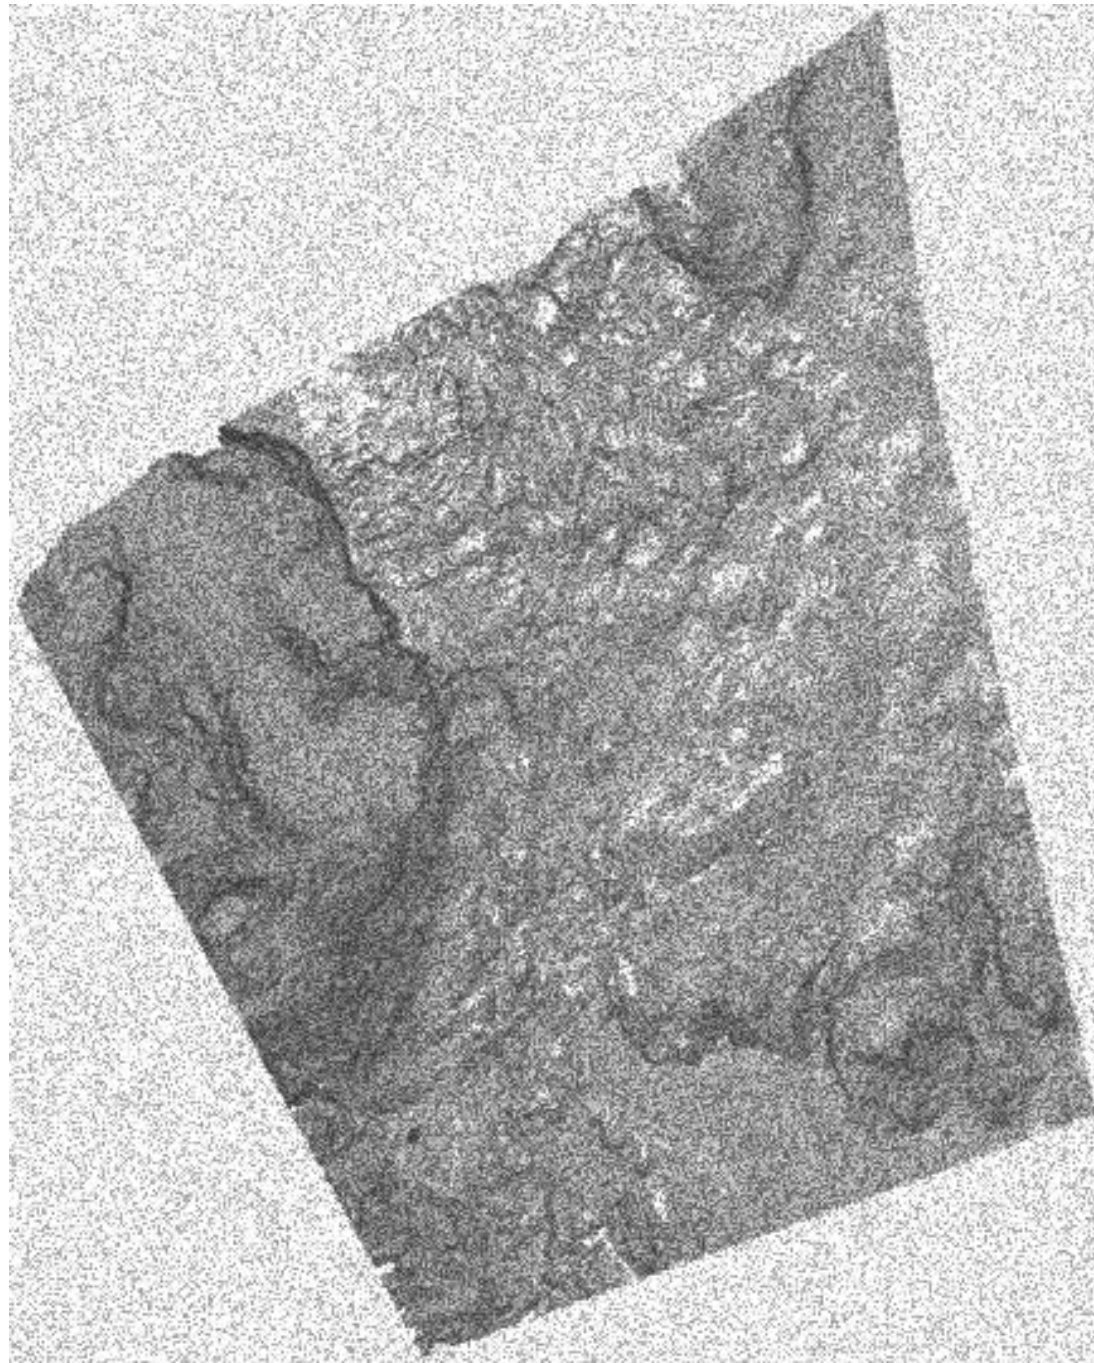

Speckle7

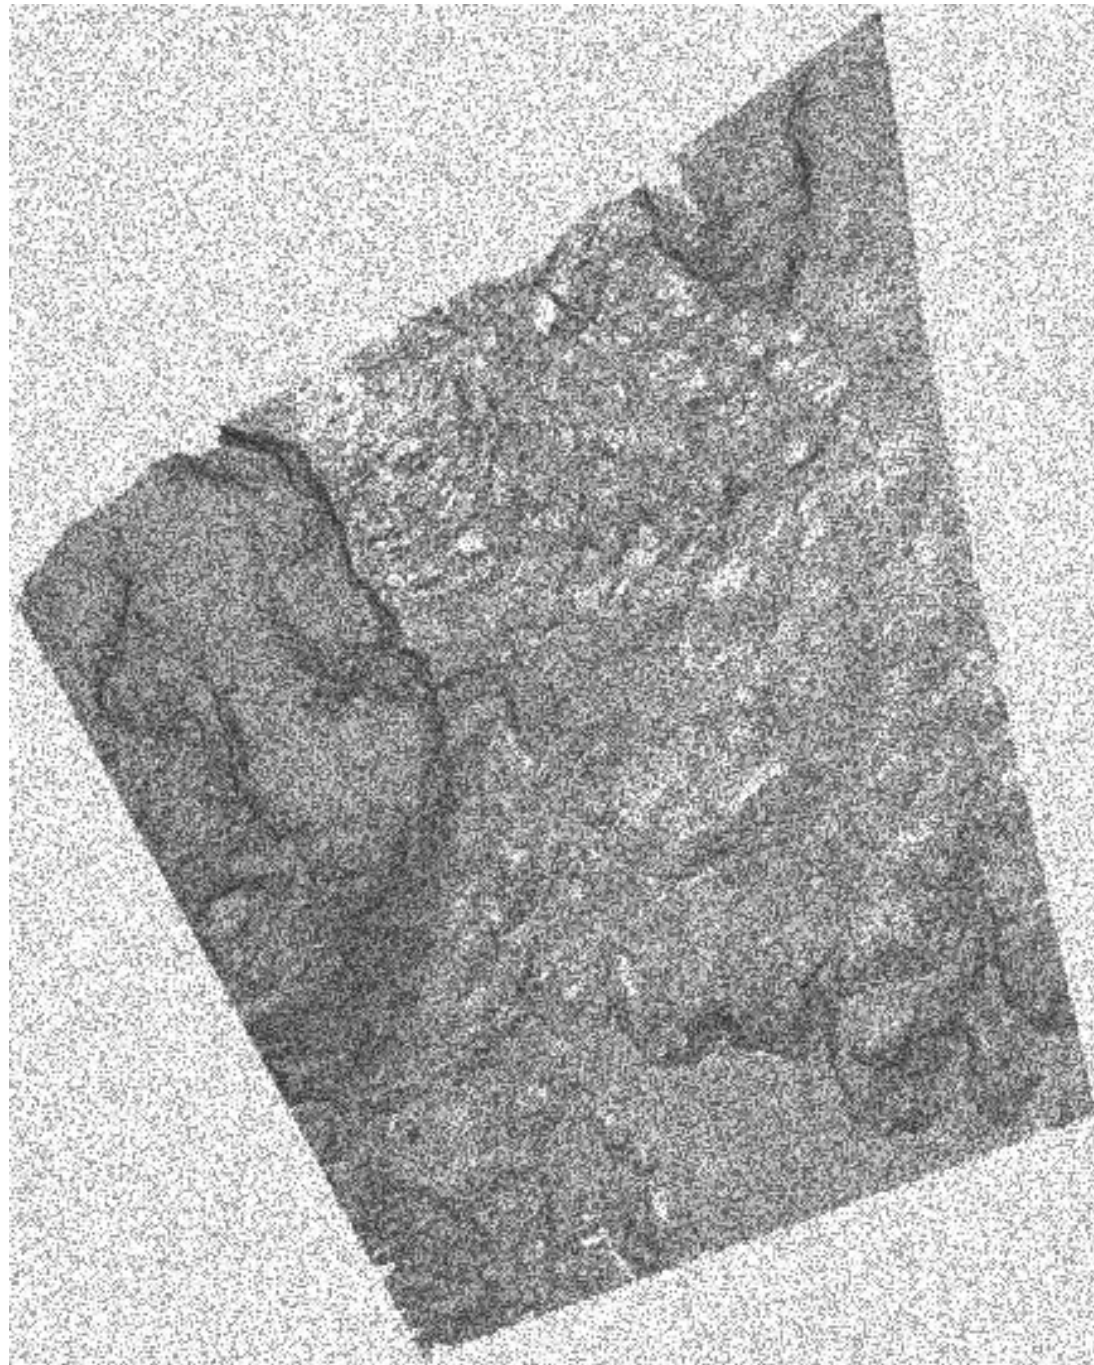

Supplement: s1 [file s1 › S2 - synthetic images.pdf]
